# Supplementary material for: Avian Migration-Mediated Cross-Species Transmission and Recombination driving the Diversity of Gammacoronaviruses and Deltacoronaviruses
Source: Research Square preprint supplement (doi:10.21203/rs.3.rs-4674414/v1), 2024-07-23
Supplement: Supplementary file 1 [file 8f911f3d618b1406eba6c162.xlsx]

## Sheet: TableS1
Table S1 Summary of Sequence Information for Gammacoronavirus and Deltacoronavirus
Order	Family	Genus	Species	Common name	Migratory Bird	Sampling in this study	CoV postive only in this study	Deltacoronavirus										Gammacoronavirus									Total
								Andecovirus		Buldecovirus						Herdecovirus		Brangacovirus	Cegacovirus	Igacovirus
								DuCoV_NL1	WiCoV_HKU20	BulCV_HKU11	CMCoV_HKU21	MunCV_HKU13	PoCoV_HKU15	SandCoV_NL2	WECoV_HKU16	Herdecovirus sp.	NHCoV_HKU19	BcanCoV_CB17	BdCoV_HKU22	ACoV_9203	DuCoV_2714	DuCoV_NL3	GaCoV_NL4	IBV	Igacovirus sp1.	Igacovirus sp2.
Anseriformes	Anatidae	Aix	Aix galericulata	Mandarin Duck	yes	yes	yes															2					2
Anseriformes	Anatidae	Anas	Anas acuta	Northern Pintail	yes	yes							1		1		1	1				45					49
Anseriformes	Anatidae	Anas	Anas bahamensis	White-cheeked Pintail	yes																	2					2
Anseriformes	Anatidae	Anas	Anas clypeata	Northern shoveler		yes		2	4													27					33
Anseriformes	Anatidae	Anas	Anas crecca	Common Teal	yes	yes		14					2		1							122		8			147
Anseriformes	Anatidae	Anas	Anas gracilis	Grey Teal																		11					11
Anseriformes	Anatidae	Anas	Anas platyrhynchos	Mallard	yes	yes							1				1					251		6			259
Anseriformes	Anatidae	Anas	Anas poecilorhyncha	Indian Spot-billed Duck	yes	yes	yes						1									3					4
Anseriformes	Anatidae	Anas	Anas sp.																		1			3			4
Anseriformes	Anatidae	Anas	Anas superciliosa	Pacific Black Duck				2														11					13
Anseriformes	Anatidae	Anas	Anas zonorhyncha	Chinese Spot-billed Duck	yes	yes		2					4		2			2				69					79
Anseriformes	Anatidae	Anser	Anser fabalis	Bean Goose	yes	yes												1									1
Anseriformes	Anatidae	Anser	Anser anser	Greylag Goose	yes	yes												3				3		1			7
Anseriformes	Anatidae	Anser	Anser caerulescens	Snow Goose	yes													1									1
Anseriformes	Anatidae	Anser	Anser cygnoides	Swan goose		yes											2	1				5		10			18
Anseriformes	Anatidae	Anser	Anser fabalis	Bean Goose	yes	yes												2									2
Anseriformes	Anatidae	Aythya	Aythya ferina	Common Pochard	yes	yes	yes		1													3					4
Anseriformes	Anatidae	Aythya	Aythya fuligula	Tufted Duck	yes	yes																3					3
Anseriformes	Anatidae	Aythya	Aythya marila	Greater Scaup	yes	yes																3					3
Anseriformes	Anatidae	Branta	Branta bernicla	Brent Goose	yes													3									3
Anseriformes	Anatidae	Branta	Branta canadensis	Canada Goose	yes													2									2
Anseriformes	Anatidae	Cairina	Cairina moschata	Muscovy Duck																		1					1
Anseriformes	Anatidae	Cygnus	Cygnus columbianus	Tundra Swan	yes	yes	yes											1									1
Anseriformes	Anatidae	Cygnus	Cygnus olor	Mute Swan	yes	yes												85				16					101
Anseriformes	Anatidae	Dendrocygna	Dendrocygna javanica	Lesser Whistling-duck														1									1
Anseriformes	Anatidae	Mareca	Mareca americana	American wigeon	yes												1										1
Anseriformes	Anatidae	Mareca	Mareca falcata	Falcated Duck	yes	yes	yes															2					2
Anseriformes	Anatidae	Mareca	Mareca penelope	Eurasian Wigeon	yes	yes			5						2		1					33					41
Anseriformes	Anatidae	Mareca	Mareca strepera	Gadwall	yes	yes		1	1						2							5					9
Anseriformes	Anatidae	Melanitta	Melanitta nigra	Common Scoter	yes																	2		2			4
Anseriformes	Anatidae	Mergus	Mergus merganser	Goosander	yes																	1					1
Anseriformes	Anatidae	Radjah	Radjah radjah	Radjah Shelduck																		1					1
Anseriformes	Anatidae	Sibirionetta	Sibirionetta formosa	Baikal Teal	yes	yes																3					3
Anseriformes	Anatidae	Spatula	Spatula clypeata	Northern Shoveler	yes																	1					1
Anseriformes	Anatidae	Spatula	Spatula querquedula	Garganey	yes																	1					1
Artiodactyla	Delphinidae	Bottlenose	Delphinus truncatus	Bottlenose dolphin															7								7
Artiodactyla	Monodontidae	Delphinapterus	Delphinapterus leucas	Beluga whale															2								2
Artiodactyla	Suidae	Sus	Sus scrofa domestica	Pig									199											10		11	220
Charadriiformes	Charadriidae	Charadrius	Charadrius alexandrinus	Kentish Plover	yes	yes	yes								2							2					4
Charadriiformes	Charadriidae	Charadrius	Charadrius leschenaultii	Greater Sandplover	yes	yes	yes								2												2
Charadriiformes	Charadriidae	Pluvialis	Pluvialis squatarola	Grey Plover	yes	yes	yes							2													2
Charadriiformes	Laridae	Chroicocephalus	Chroicocephalus ridibundus	Black-headed gull											14			1				67			1	2	85
Charadriiformes	Laridae	Larus	Larus argentatus	European Herring Gull	yes										1							2					3
Charadriiformes	Laridae	Larus	Larus canus	Mew Gull	yes										8							9					17
Charadriiformes	Laridae	Larus	Larus fuscus (heuglin)	Lesser black-backed gull																		1					1
Charadriiformes	Laridae	Larus	Larus glaucescens	Glaucous-winged Gull	yes																	1					1
Charadriiformes	Laridae	Larus	Larus heuglini	Heuglin's gull											1												1
Charadriiformes	Laridae	Larus	Larus hyperboreus	Glaucous Gull	yes																	1					1
Charadriiformes	Laridae	Larus	Larus schistisagus	Slaty-backed Gull	yes										1												1
Charadriiformes	Laridae	Larus	larus sp.																			1					1
Charadriiformes	Laridae	Rynchops	Rynchops niger	Black Skimmer	yes										1												1
Charadriiformes	Laridae	Sterna	Sterna hirundo	Common Tern	yes										1												1
Charadriiformes	Recurvirostridae	Recurvirostra	Recurvirostra novaehollandiae	Red-necked Avocet																		1					1
Charadriiformes	Scolopacidae	Actitis	Actitis hypoleucos	Common Sandpiper		yes																1					1
Charadriiformes	Scolopacidae	Arenaria	Arenaria interpres	Ruddy Turnstone	yes	yes								8								23					31
Charadriiformes	Scolopacidae	Calidris	Calidris acuminata	Sharp-tailed Sandpiper	yes	yes									1												1
Charadriiformes	Scolopacidae	Calidris	Calidris alba	Sanderling	yes	yes																1					1
Charadriiformes	Scolopacidae	Calidris	Calidris alpina	Dunlin	yes	yes								7								4					11
Charadriiformes	Scolopacidae	Calidris	Calidris falcinellus	Broad-billed Sandpiper	yes	yes	yes							2													2
Charadriiformes	Scolopacidae	Calidris	Calidris ferruginea	Curlew Sandpiper	yes									1								3					4
Charadriiformes	Scolopacidae	Calidris	Calidris fuscicollis	White-rumped Sandpiper	yes																	1					1
Charadriiformes	Scolopacidae	Calidris	Calidris mauri	Western Sandpiper	yes																	1					1
Charadriiformes	Scolopacidae	Calidris	Calidris ptilocnemis	Rock Sandpiper	yes																	4					4
Charadriiformes	Scolopacidae	Calidris	Calidris ruficollis	Red-necked Stint	yes	yes								5	2							11					18
Charadriiformes	Scolopacidae	Calidris	Calidris subminuta	Long-toed Stint	yes	yes	yes							3													3
Charadriiformes	Scolopacidae	Calidris	Calidris tenuirostris	Great Knot	yes	yes	yes							38								20					58
Charadriiformes	Scolopacidae	Gallinago	Gallinago gallinago	Common Snipe	yes	yes								1													1
Charadriiformes	Scolopacidae	Limosa	Limosa lapponica	Bar-tailed Godwit	yes	yes	yes															5					5
Charadriiformes	Scolopacidae	Limosa	Limosa limosa	Black-tailed Godwit	yes	yes	yes															2					2
Charadriiformes	Scolopacidae	Numenius	Numenius phaeopus	Whimbrel	yes	yes	yes															12					12
Charadriiformes	Scolopacidae	Tringa	Tringa nebularia	Common Greenshank	yes	yes	yes							1													1
Charadriiformes	Scolopacidae	Tringa	Tringa totanus	Common Redshank	yes	yes	yes										1					4					5
Charadriiformes	Scolopacidae	Xenus	Xenus cinereus	Terek Sandpiper	yes	yes	yes															2					2
Charadriiformes	Stercorariidae	pomarine	pomarine jaeger	Pomarine jaeger											1												1
Columbiformes	Columbidae	Columba	Columba livia	Rock Dove									3		1							1		7		3	15
Columbiformes	Columbidae	Columba	Columba livia domestica	Domestic pigeon																						35	35
Columbiformes	Columbidae	Columba	Columba sp.																					1		4	5
Falconiformes	Falconidae	Falco	Falco sp.												1												1
Galliformes	Numididae	Numida	Numida meleagris	Helmeted Guineafowl																				3			3
Galliformes	Phasianidae	Coturnix	Coturnix coturnix	Common Quail	yes								10											2			12
Galliformes	Phasianidae	Coturnix	Coturnix japonica	Japanese Quail	yes								1														1
Galliformes	Phasianidae	Gallus	Gallus gallus	Red Junglefowl																1		122	2	1562			1687
Galliformes	Phasianidae	Gallus	Gallus gallus domesticus	Chicken																						2	2
Galliformes	Phasianidae	Meleagris	Meleagris gallopavo	Wild Turkey																				8			8
Galliformes	Phasianidae	Pavo	Pavo muticus	Green Peafowl																				1			1
Galliformes	Phasianidae	Phasianus	Phasianus colchicus	Common Pheasant									1				1							6			8
Gruiformes	Rallidae	Fulica	Fulica atra	Common Coot	yes	yes																1					1
Gruiformes	Rallidae	Gallinula	Gallinula chloropus	Common Moorhen	yes	yes					2																2
Otidiformes	Otididae	Chlamydotis	Chlamydotis undulata	African Houbara											1												1
Passeriformes	Corvidae	Corvus	Corvus cornix	Hooded crow									1														1
Passeriformes	Corvidae	Corvus	Corvus frugilegus	Rook	yes																	2					2
Passeriformes	Corvidae	Pica	Pica pica	Eurasian Magpie									4														4
Passeriformes	Estrildidae	Lonchura	Lonchura striata	White-rumped Munia								1															1
Passeriformes	Muscicapidae	Copsychus	Copsychus saularis	Oriental Magpie-robin								2															2
Passeriformes	Passeridae	Montifringilla	Montifringilla taczanowskii	White-rumped snowfinch									1														1
Passeriformes	Passeridae	Passer	Passer domesticus	House Sparrow																				1			1
Passeriformes	Passeridae	Passer	Passer montanus	Eurasian Tree Sparrow									6														6
Passeriformes	Pycnonotidae	Pycnonotus	Pycnonotus jocosus	Red-whiskered Bulbul						1																	1
Passeriformes	Pycnonotidae	Pycnonotus	Pycnonotus sinensis	Light-vented Bulbul	yes	yes				1																	1
Passeriformes	Sturnidae	Acridotheres	Acridotheres cristatellus	Crested Myna																		1					1
Passeriformes	Sturnidae	Sturnus	Sturnus vulgaris	Common Starling	yes																					1	1
Passeriformes	Turdidae	Turdus	Turdus hortulorum	Grey-backed Thrush	yes					2																	2
Passeriformes	Zosteropidae	Zosterops	Zosterops simplex	Swinhoe's White-eye											2												2
Pelecaniformes	Ardeidae	Ardea	Ardea cinerea	Grey Heron	yes	yes											4										4
Pelecaniformes	Ardeidae	Ardea	Ardea modesta	Eastern great egret		yes																1					1
Pelecaniformes	Ardeidae	Ardeola	Ardeola bacchus	Chinese Pond-heron	yes												9										9
Pelecaniformes	Ardeidae	Bubulcus	Bubulcus ibis	Cattle Egret	yes	yes											2							5			7
Pelecaniformes	Ardeidae	Egretta	Egretta garzetta	Little Egret	yes	yes									1		10					1					12
Pelecaniformes	Ardeidae	Egretta	Egretta picata	Pied Heron	yes												5										5
Pelecaniformes	Ardeidae	Gorsachius	Gorsachius magnificus	White-eared night heron													2										2
Pelecaniformes	Ardeidae	Nycticorax	Nycticorax nycticorax	Black-crowned Night-heron	yes	yes											12					1					13
Pelecaniformes	Threskiornithidae	Platalea	Platalea minor	Black-faced Spoonbill	yes											1											1
Primates	Hominidae	Homo	Homo sapiens	Human									3														3
Psittaciformes	Psittacidae	Amazona	Amazona vinacea	Vinaceous-breasted Amazon									1														1
Rodentia	Sciuridae	Marmota	Marmota himalayana	Himalayan marmot									1														1
Sphenisciformes	Spheniscidae	Pygoscelis	Pygoscelis papua	Gentoo Penguin											1												1
Suliformes	Phalacrocoracidae	Phalacrocorax	Phalacrocorax carbo	Great Cormorant	yes	yes											20										20
Suliformes	Phalacrocoracidae	Phalacrocorax	Phalacrocorax fuscicollis	Indian Cormorant											2												2
Suliformes	Sulidae	Sula	Sula leucogaster	Brown Booby													3										3
Avian.sp																								5			5
environmental																						1		27			28
unknown 待确认										2		4															6
Total								21	11	6	2	7	240	68	52	1	75	104	9	1	1	936	2	1668	1	58	3263

## Sheet: TableS2
Table S2 Species Sampled and Sampling Periods for Migratory Birds
Order	Family	Genus	Species	Common name	2019/10	2019/11	2019/12	2019/4	2020/10	2020/11	2020/12	2020/2	2020/3	2020/4	2020/9	2021/1	2021/10	2021/11	2021/12	2021/3	2021/4	2021/5	2021/7	2021/8	2021/9	2022/1	2022/10	2022/11	2022/12	2022/2	2022/3	2022/7	2022/8	2022/9	2023/1	2023/4
Accipitriformes	Accipitridae	Buteo	Buteo japonicus	Japanese Buzzard																1									1								2
Anseriformes	Anatidae	Aix	Aix galericulata	Mandarin Duck	19	15												12								3											49
Anseriformes	Anatidae	Anas	Anas acuta	Northern Pintail	1	16			1	3	7							7	6							1		5	4								51
Anseriformes	Anatidae	Anas	Anas clypeata	Northern shoveler	4	13	1			5	5							27	17									6									78
Anseriformes	Anatidae	Anas	Anas crecca	Common Teal	170	207	6		32	134	10	1						137	87		1					3	4	12									804
Anseriformes	Anatidae	Anas	Anas platyrhynchos	Mallard	7	33	3		1	54	25	28				1		86	37							8		118	10						4		415
Anseriformes	Anatidae	Anas	Anas poecilorhyncha	Indian Spot-billed Duck														6			1																7
Anseriformes	Anatidae	Anas	Anas sp.																									4									4
Anseriformes	Anatidae	Anas	Anas zonorhyncha	Chinese Spot-billed Duck	43	72	17			36	40	9				6		30	3							3	2	83									344
Anseriformes	Anatidae	Anas	Anser albifrons	Greater White-fronted Goose																									2								2
Anseriformes	Anatidae	Anas	Anser anser	Greylag Goose																									1								1
Anseriformes	Anatidae	Anas	Anser cygnoides	Swan goose							2																		3								5
Anseriformes	Anatidae	Anas	Anser fabalis	Bean Goose						1	2								5										11								19
Anseriformes	Anatidae	Aythya	Aythya ferina	Common Pochard		2				2	3					1		7	1									9	10								35
Anseriformes	Anatidae	Aythya	Aythya fuligula	Tufted Duck						1	2							1								4											8
Anseriformes	Anatidae	Aythya	Aythya marila	Greater Scaup		1				1								1																			3
Anseriformes	Anatidae	Cygnu	Cygnus melancoryphus	Black-necked Swan							3																										3
Anseriformes	Anatidae	Cygnus	Cygnus atratus	Black Swan												1		1	10								1										13
Anseriformes	Anatidae	Cygnus	Cygnus columbianus	Tundra Swan						6	2								14									5	33		1				1		62
Anseriformes	Anatidae	Cygnus	Cygnus olor	Mute Swan							10																	1									11
Anseriformes	Anatidae	Mareca	Mareca penelope	Eurasian Wigeon	5	18				18	8							46	1									5									101
Anseriformes	Anatidae	Mareca	Mareca falcata	Falcated Duck	4	5				5								8										1									23
Anseriformes	Anatidae	Mareca	Mareca strepera	Gadwall		2			1		8							20	8							4		1									44
Anseriformes	Anatidae	Sibirionetta	Sibirionetta formosa	Baikal Teal						1																		1									2
Bucerotiformes	Upupidae	Upupa	Upupa epops	Common Hoopoe							1																										1
Charadriiformes	Charadriidae	Charadrius	Charadrius alexandrinus	Kentish Plover											1										5								19	4			29
Charadriiformes	Charadriidae	Charadrius	Charadrius dubius	Little Ringed Plover																													11	1			12
Charadriiformes	Charadriidae	Charadrius	Charadrius leschenaultii	Greater Sandplover				5						3	1						1			1	1								24	2			38
Charadriiformes	Charadriidae	Charadrius	Charadrius mongolus	Lesser Sandplover				1						6	3						1				6												17
Charadriiformes	Charadriidae	Pluvialis	Pluvialis fulva	Pacific Golden Plover																					6								4				10
Charadriiformes	Charadriidae	Pluvialis	Pluvialis squatarola	Grey Plover				3						4							10	2			4									1			24
Charadriiformes	Glareolidae	Glareola	Glareola maldivarum	Oriental Pratincole											1																						1
Charadriiformes	Laridae	Chlidonias	Chlidonias hybrida	Whiskered Tern																													3				3
Charadriiformes	Laridae	Chlidonias	Chlidonias leucopterus	White-winged Tern																													1	1			2
Charadriiformes	Recurvirostridae	Recurvirostra	Recurvirostra avosetta	Pied Avocet														1																			1
Charadriiformes	Scolopacidae	Actitis	Actitis hypoleucos	Common Sandpiper																					2								1				3
Charadriiformes	Scolopacidae	Arenaria	Arenaria interpres	Ruddy Turnstone				6						2	4						3			1	2								5			1	24
Charadriiformes	Scolopacidae	Calidris	Calidris acuminata	Sharp-tailed Sandpiper										2	1						4												2				9
Charadriiformes	Scolopacidae	Calidris	Calidris alba	Sanderling				4																									1	1			6
Charadriiformes	Scolopacidae	Calidris	Calidris alpina	Dunlin									1	18	14						47				10		11						11	2			114
Charadriiformes	Scolopacidae	Calidris	Calidris bairdii	Baird's Sandpiper											1																						1
Charadriiformes	Scolopacidae	Calidris	Calidris canutus	Red Knot				16													5	4			1									2			28
Charadriiformes	Scolopacidae	Calidris	Calidris falcinellus	Broad-billed Sandpiper											3										11		1						23				38
Charadriiformes	Scolopacidae	Calidris	Calidris ruficollis	Red-necked Stint										2											2		2						87	3			96
Charadriiformes	Scolopacidae	Calidris	Calidris subminuta	Long-toed Stint											1																		19				20
Charadriiformes	Scolopacidae	Calidris	Calidris tenuirostris	Great Knot				102					30	116							47				19									51			365
Charadriiformes	Scolopacidae	Gallinago	Gallinago gallinago	Common Snipe	1																												2				3
Charadriiformes	Scolopacidae	Gallinago	Gallinago megala	Swinhoe's Snipe																							1										1
Charadriiformes	Scolopacidae	Limosa	Limosa lapponica	Bar-tailed Godwit				22					1	28	6						15				3									5			80
Charadriiformes	Scolopacidae	Limosa	Limosa limosa	Black-tailed Godwit											32										3									5			40
Charadriiformes	Scolopacidae	Numenius	Numenius phaeopus	Whimbrel				5						2	8						9	2			1								2	20			49
Charadriiformes	Scolopacidae	Scolopax	Scolopax rusticola	Eurasian Woodcock													1				2						2							1			6
Charadriiformes	Scolopacidae	Tringa	Tringa brevipes	Grey-tailed Tattler																	5				1								1				7
Charadriiformes	Scolopacidae	Tringa	Tringa erythropus	Spotted Redshank	4																													1			5
Charadriiformes	Scolopacidae	Tringa	Tringa glareola	Wood Sandpiper											4									1	1								4				10
Charadriiformes	Scolopacidae	Tringa	Tringa nebularia	Common Greenshank											7						1	1		1	3								9				22
Charadriiformes	Scolopacidae	Tringa	Tringa stagnatilis	Marsh Sandpiper											1										1		4						6				12
Charadriiformes	Scolopacidae	Tringa	Tringa totanus	Common Redshank				1							10						2	8		2	12								24	3			62
Charadriiformes	Scolopacidae	Xenus	Xenus cinereus	Terek Sandpiper				8						2	4						5	10		1	6								27	3			66
Ciconiiformes	Ciconiidae	Ciconia	Ciconia boyciana	Oriental Stork							2																										2
Columbiformes	Columbidae	Spilopelia	Spilopelia chinensis	Eastern Spotted Dove		1												2						1	1		2					1		1			9
Columbiformes	Columbidae	Streptopelia	Streptopelia orientalis	Oriental Turtle-dove		3																															3
Falconiformes	Falconidae	Falco	Falco peregrinus	Peregrine Falcon						1							1												2								4
Falconiformes	Falconidae	Falco	Falco tinnunculus	Common Kestrel						1								1					2	2	1		1		1			1		2			12
Gruiformes	Gruidae	Grus	Grus nigricollis	Black-necked Crane							5																										5
Gruiformes	Rallidae	Fulica	Fulica atra	Common Coot	1	1	6			1						1		12	3							2		5		10							42
Gruiformes	Rallidae	Gallinula	Gallinula chloropus	Common Moorhen	9	25	5																														39
Gruiformes	Rallidae	Rallus	Rallus indicus	Eastern Water Rail	3																																3
Passeriformes	Alaudidae	Alauda	Alauda arvensis	Eurasian Skylark																								1									1
Passeriformes	Fringillidae	Eophona	Eophona migratoria	Chinese Grosbeak																														2			2
Passeriformes	Laniidae	Lanius	Lanius schach	Long-tailed Shrike																				1													1
Passeriformes	Muscicapidae	Calliope	Calliope calliope	Siberian Rubythroat														1																			1
Passeriformes	Muscicapidae	Luscinia	Luscinia megarhynchos	Common Nightingale												1		1																1			3
Passeriformes	Phylloscopidae	Phylloscopus	Phylloscopus trochilus	Willow Warbler														1																			1
Passeriformes	Pittidae	Pitta	Pitta nympha	Fairy Pitta																					2		1							2			5
Passeriformes	Pycnonotidae	Pycnonotus	Pycnonotus sinensis	Light-vented Bulbul																			1														1
Passeriformes	Turdidae	Geokichla	Geokichla sibirica	Siberian Thrush		4																															4
Passeriformes	Turdidae	Turdus	Turdus pallidus	Pale Thrush		6					1																										7
Passeriformes	Turdidae	Zoothera	Zoothera aurea	White's Thrush														3									2				1						6
Pelecaniformes	Ardeidae	Ardea	Ardea alba	Great White Egret																										1							1
Pelecaniformes	Ardeidae	Ardea	Ardea cinerea	Grey Heron							3						2	3	10								1	1	1		2						23
Pelecaniformes	Ardeidae	Ardea	Ardea modesta	Eastern great egret														3																			3
Pelecaniformes	Ardeidae	Bubulcus	Bubulcus ibis	Cattle Egret																														2			2
Pelecaniformes	Ardeidae	Egretta	Egretta garzetta	Little Egret							1					1	3	2	1				5				2	1	1		4	2	1	2			26
Pelecaniformes	Ardeidae	Ixobrychus	Ixobrychus sinensis	Yellow Bittern																														1			1
Pelecaniformes	Ardeidae	Nycticorax	Nycticorax nycticorax	Black-crowned Night-heron							9					4	2	1	4				4	2	1	7	5	1	1			1	2	7			51
Pelecaniformes	Pelecanidae	Pelecanus	Pelecanus crispus	Dalmatian Pelican							4																										4
Pelecaniformes	Threskiornithidae	Platalea	Platalea leucorodia	Eurasian Spoonbill														4																			4
Pelecaniformes	Threskiornithidae	Threskiorni	Threskiornis melanocephalus	Black-headed Ibis							2																										2
Phoenicopteriformes	Phoenicopteridae	Phoenicopterus	Phoenicopterus ruber	American Flamingo							12																										12
Podicipediformes	Podicipedidae	Tachybaptus	Tachybaptus ruficollis	Little Grebe															1																		1
Strigiformes	Strigidae	Asio	Asio otus	Northern Long-eared Owl		4	2																														6
Strigiformes	Strigidae	Otus	Otus scops	Eurasian Scops-owl														1									2	1									4
Strigiformes	Strigidae	Otus	Otus sunia	Oriental Scops-owl													2																	1			3
Suliformes	Phalacrocoracidae	Phalacrocorax	Phalacrocorax carbo	Great Cormorant																								1									1
Unknown bird									14	116			2	82	272		156	156		16	41							315	205				27	274			1676
Total					271	428	40	173	49	386	167	38	34	267	374	16	167	581	208	17	200	27	12	13	105	35	44	577	286	11	8	5	316	401	5	1	5262

## Sheet: TableS3
Table S3 Coronavirus Positive Detection in Migratory Bird Samples
Order	Family	Genus	Species	2019/10	2019/11	2019/12	2019/4	2020/10	2020/11	2020/12	2020/2	2020/3	2020/4	2020/9	2021/1	2021/10	2021/11	2021/12	2021/3	2021/4	2021/5	2021/7	2021/8	2021/9	2022/1	2022/10	2022/11	2022/12	2022/2	2022/3	2022/7	2022/8	2022/9	2023/1	2023/4	Total
Accipitriformes	Accipitridae	Buteo	Buteo japonicus																																	0
Anseriformes	Anatidae	Aix	Aix galericulata														2																			2
Anseriformes	Anatidae	Anas	Anas acuta					1									5										2									8
Anseriformes	Anatidae	Anas	Anas clypeata							1							2	1																		4
Anseriformes	Anatidae	Anas	Anas crecca		1			17	11								37	14		1																81
Anseriformes	Anatidae	Anas	Anas platyrhynchos	1	3			1	5	9							67	2									9							4		101
Anseriformes	Anatidae	Anas	Anas poecilorhyncha														6			1																7
Anseriformes	Anatidae	Anas	Anas sp.																																	0
Anseriformes	Anatidae	Anas	Anas zonorhyncha	3	2				9	6							12										5									37
Anseriformes	Anatidae	Anas	Anser albifrons																																	0
Anseriformes	Anatidae	Anas	Anser anser																																	0
Anseriformes	Anatidae	Anas	Anser cygnoides																																	0
Anseriformes	Anatidae	Anas	Anser fabalis															1																		1
Anseriformes	Anatidae	Aythya	Aythya ferina														3	1																		4
Anseriformes	Anatidae	Aythya	Aythya fuligula																																	0
Anseriformes	Anatidae	Aythya	Aythya marila																																	0
Anseriformes	Anatidae	Cygnu	Cygnus melancoryphus																																	0
Anseriformes	Anatidae	Cygnus	Cygnus atratus																																	0
Anseriformes	Anatidae	Cygnus	Cygnus columbianus																															1		1
Anseriformes	Anatidae	Mareca	Mareca penelope	1						1							9																			11
Anseriformes	Anatidae	Cygnus	Cygnus olor																																	0
Anseriformes	Anatidae	Mareca	Mareca falcata														2																			2
Anseriformes	Anatidae	Mareca	Mareca strepera							2							3	1																		6
Anseriformes	Anatidae	Sibirionetta	Sibirionetta formosa																																	0
Bucerotiformes	Upupidae	Upupa	Upupa epops																																	0
Charadriiformes	Charadriidae	Charadrius	Charadrius alexandrinus																														3			3
Charadriiformes	Charadriidae	Charadrius	Charadrius dubius																																	0
Charadriiformes	Charadriidae	Charadrius	Charadrius leschenaultii																														1			1
Charadriiformes	Charadriidae	Charadrius	Charadrius mongolus																																	0
Charadriiformes	Charadriidae	Pluvialis	Pluvialis fulva																																	0
Charadriiformes	Charadriidae	Pluvialis	Pluvialis squatarola																	1																1
Charadriiformes	Glareolidae	Glareola	Glareola maldivarum																																	0
Charadriiformes	Laridae	Chlidonias	Chlidonias hybrida																																	0
Charadriiformes	Laridae	Chlidonias	Chlidonias leucopterus																																	0
Charadriiformes	Recurvirostridae	Recurvirostra	Recurvirostra avosetta																																	0
Charadriiformes	Scolopacidae	Actitis	Actitis hypoleucos																																	0
Charadriiformes	Scolopacidae	Arenaria	Arenaria interpres																				1												1	2
Charadriiformes	Scolopacidae	Calidris	Calidris acuminata																																	0
Charadriiformes	Scolopacidae	Calidris	Calidris alba																																	0
Charadriiformes	Scolopacidae	Calidris	Calidris alpina											1						1																2
Charadriiformes	Scolopacidae	Calidris	Calidris bairdii																																	0
Charadriiformes	Scolopacidae	Calidris	Calidris canutus																																	0
Charadriiformes	Scolopacidae	Calidris	Calidris falcinellus																					2												2
Charadriiformes	Scolopacidae	Calidris	Calidris ruficollis																														3			3
Charadriiformes	Scolopacidae	Calidris	Calidris subminuta																													2				2
Charadriiformes	Scolopacidae	Calidris	Calidris tenuirostris																					3									40			43
Charadriiformes	Scolopacidae	Gallinago	Gallinago gallinago																																	0
Charadriiformes	Scolopacidae	Gallinago	Gallinago megala																																	0
Charadriiformes	Scolopacidae	Limosa	Limosa lapponica											3																						3
Charadriiformes	Scolopacidae	Limosa	Limosa limosa																														2			2
Charadriiformes	Scolopacidae	Numenius	Numenius phaeopus																														20			20
Charadriiformes	Scolopacidae	Scolopax	Scolopax rusticola																																	0
Charadriiformes	Scolopacidae	Tringa	Tringa brevipes																																	0
Charadriiformes	Scolopacidae	Tringa	Tringa erythropus																																	0
Charadriiformes	Scolopacidae	Tringa	Tringa glareola																																	0
Charadriiformes	Scolopacidae	Tringa	Tringa nebularia																													3				3
Charadriiformes	Scolopacidae	Tringa	Tringa stagnatilis																																	0
Charadriiformes	Scolopacidae	Tringa	Tringa totanus																					1								3	3			7
Charadriiformes	Scolopacidae	Xenus	Xenus cinereus																														3			3
Ciconiiformes	Ciconiidae	Ciconia	Ciconia boyciana																																	0
Columbiformes	Columbidae	Spilopelia	Spilopelia chinensis																																	0
Columbiformes	Columbidae	Streptopelia	Streptopelia orientalis																																	0
Falconiformes	Falconidae	Falco	Falco peregrinus																																	0
Falconiformes	Falconidae	Falco	Falco tinnunculus																																	0
Gruiformes	Gruidae	Grus	Grus nigricollis																																	0
Gruiformes	Rallidae	Fulica	Fulica atra																																	0
Gruiformes	Rallidae	Gallinula	Gallinula chloropus																																	0
Gruiformes	Rallidae	Rallus	Rallus indicus																																	0
Passeriformes	Alaudidae	Alauda	Alauda arvensis																																	0
Passeriformes	Fringillidae	Eophona	Eophona migratoria																																	0
Passeriformes	Laniidae	Lanius	Lanius schach																																	0
Passeriformes	Muscicapidae	Calliope	Calliope calliope																																	0
Passeriformes	Muscicapidae	Luscinia	Luscinia megarhynchos																																	0
Passeriformes	Phylloscopidae	Phylloscopus	Phylloscopus trochilus																																	0
Passeriformes	Pittidae	Pitta	Pitta nympha																																	0
Passeriformes	Pycnonotidae	Pycnonotus	Pycnonotus sinensis																																	0
Passeriformes	Turdidae	Geokichla	Geokichla sibirica																																	0
Passeriformes	Turdidae	Turdus	Turdus pallidus																																	0
Passeriformes	Turdidae	Zoothera	Zoothera aurea																																	0
Pelecaniformes	Ardeidae	Ardea	Ardea alba																																	0
Pelecaniformes	Ardeidae	Ardea	Ardea cinerea																																	0
Pelecaniformes	Ardeidae	Ardea	Ardea modesta														3																			3
Pelecaniformes	Ardeidae	Bubulcus	Bubulcus ibis																														1			1
Pelecaniformes	Ardeidae	Egretta	Egretta garzetta																			2									1		1			4
Pelecaniformes	Ardeidae	Ixobrychus	Ixobrychus sinensis																																	0
Pelecaniformes	Ardeidae	Nycticorax	Nycticorax nycticorax																							1							1			2
Pelecaniformes	Pelecanidae	Pelecanus	Pelecanus crispus																																	0
Pelecaniformes	Threskiornithidae	Platalea	Platalea leucorodia																																	0
Pelecaniformes	Threskiornithidae	Threskiorni	Threskiornis melanocephalus																																	0
Phoenicopteriformes	Phoenicopteridae	Phoenicopterus	Phoenicopterus ruber																																	0
Podicipediformes	Podicipedidae	Tachybaptus	Tachybaptus ruficollis																																	0
Strigiformes	Strigidae	Asio	Asio otus																																	0
Strigiformes	Strigidae	Otus	Otus scops																																	0
Strigiformes	Strigidae	Otus	Otus sunia																																	0
Suliformes	Phalacrocoracidae	Phalacrocorax	Phalacrocorax carbo																																	0
Total				5	6	0	0	19	25	19	0	0	0	4	0	0	151	20	0	4	0	2	1	6	0	1	16	0	0	0	1	8	78	5	1	372

## Sheet: TableS4
Table S4 Positivity Rate of Coronaviruses in Migratory Bird Samples
Order	Family	Genus	Species	2019/4	2019/10	2019/11	2019/12	2020/2	2020/3	2020/4	2020/9	2020/10	2020/11	2020/12	2021/1	2021/3	2021/4	2021/5	2021/7	2021/8	2021/9	2021/10	2021/11	2021/12	2022/1	2022/2	2022/3	2022/7	2022/8	2022/9	2022/10	2022/11	2022/12	2023/1	2023/4	Positive Samples	Total Samples	Positivity Rate	CI Lower	CI Upper
Accipitriformes	Accipitridae	Buteo	Buteo japonicus													0																	0			0	2	0
Anseriformes	Anatidae	Aix	Aix galericulata		0	0																	0.166667		0											2	49	0.0408163	0.0112656	0.13713
Anseriformes	Anatidae	Anas	Anas acuta		0	0						1	0	0									0.714286	0	0							0.4	0			8	51	0.156863	0.0816922	0.280104
Anseriformes	Anatidae	Anas	Anas clypeata		0	0	0						0	0.2									0.0740741	0.0588235								0				4	78	0.0512821	0.020121	0.124567
Anseriformes	Anatidae	Anas	Anas crecca		0	0.00483092	0	0				0.53125	0.0820896	0			1						0.270073	0.16092	0						0	0				81	804	0.100746	0.0818023	0.123487
Anseriformes	Anatidae	Anas	Anas platyrhynchos		0.142857	0.0909091	0	0				1	0.0925926	0.36	0								0.77907	0.0540541	0							0.0762712	0	1		101	415	0.243373	0.204564	0.286891
Anseriformes	Anatidae	Anas	Anas poecilorhyncha														1						1													7	7	1	0.64567	1
Anseriformes	Anatidae	Anas	Anas sp.																													0				0	4	0
Anseriformes	Anatidae	Anas	Anas zonorhyncha		0.0697674	0.0277778	0	0					0.25	0.15	0								0.4	0	0						0	0.060241				37	344	0.107558	0.0790461	0.144738
Anseriformes	Anatidae	Anas	Anser albifrons																														0			0	2	0
Anseriformes	Anatidae	Anas	Anser anser																														0			0	1	0
Anseriformes	Anatidae	Anas	Anser cygnoides											0																			0			0	5	0
Anseriformes	Anatidae	Anas	Anser fabalis										0	0										0.2									0			1	19	0.0526316	0.00935199	0.246387
Anseriformes	Anatidae	Aythya	Aythya ferina			0							0	0	0								0.428571	1								0	0			4	35	0.114286	0.0453518	0.259515
Anseriformes	Anatidae	Aythya	Aythya fuligula										0	0									0		0											0	8	0
Anseriformes	Anatidae	Aythya	Aythya marila			0							0										0													0	3	0
Anseriformes	Anatidae	Cygnu	Cygnus melancoryphus											0																						0	3	0
Anseriformes	Anatidae	Cygnus	Cygnus atratus												0								0	0							0					0	13	0
Anseriformes	Anatidae	Cygnus	Cygnus columbianus										0	0										0			0					0	0	1		1	62	0.016129	0.00285287	0.0858672
Anseriformes	Anatidae	Mareca	Mareca penelope		0.2	0							0	0.125									0.195652	0								0				11	101	0.108911	0.0619113	0.18457
Anseriformes	Anatidae	Cygnus	Cygnus olor											0																		0				0	11	0
Anseriformes	Anatidae	Mareca	Mareca falcata		0	0							0										0.25									0				2	23	0.0869565	0.02418	0.26796
Anseriformes	Anatidae	Mareca	Mareca strepera			0						0		0.25									0.15	0.125	0							0				6	44	0.136364	0.0640295	0.267095
Anseriformes	Anatidae	Sibirionetta	Sibirionetta formosa										0																			0				0	2	0
Bucerotiformes	Upupidae	Upupa	Upupa epops											0																						0	1	0
Charadriiformes	Charadriidae	Charadrius	Charadrius alexandrinus								0										0								0	0.75						3	29	0.103448	0.0358149	0.263851
Charadriiformes	Charadriidae	Charadrius	Charadrius dubius																										0	0						0	12	0
Charadriiformes	Charadriidae	Charadrius	Charadrius leschenaultii	0						0	0						0			0	0								0	0.5						1	38	0.0263158	0.00466059	0.134949
Charadriiformes	Charadriidae	Charadrius	Charadrius mongolus	0						0	0						0				0															0	17	0
Charadriiformes	Charadriidae	Pluvialis	Pluvialis fulva																		0								0							0	10	0
Charadriiformes	Charadriidae	Pluvialis	Pluvialis squatarola	0						0							0.1	0			0									0						1	24	0.0416667	0.00739346	0.202418
Charadriiformes	Glareolidae	Glareola	Glareola maldivarum								0																									0	1	0
Charadriiformes	Laridae	Chlidonias	Chlidonias hybrida																										0							0	3	0
Charadriiformes	Laridae	Chlidonias	Chlidonias leucopterus																										0	0						0	2	0
Charadriiformes	Recurvirostridae	Recurvirostra	Recurvirostra avosetta																				0													0	1	0
Charadriiformes	Scolopacidae	Actitis	Actitis hypoleucos																		0								0							0	3	0
Charadriiformes	Scolopacidae	Arenaria	Arenaria interpres	0						0	0						0			1	0								0						1	2	24	0.0833333	0.0231588	0.258488
Charadriiformes	Scolopacidae	Calidris	Calidris acuminata							0	0						0												0							0	9	0
Charadriiformes	Scolopacidae	Calidris	Calidris alba	0																									0	0						0	6	0
Charadriiformes	Scolopacidae	Calidris	Calidris alpina						0	0	0.0714286						0.0212766				0								0	0	0					2	114	0.0175439	0.00482442	0.061718
Charadriiformes	Scolopacidae	Calidris	Calidris bairdii								0																									0	1	0
Charadriiformes	Scolopacidae	Calidris	Calidris canutus	0													0	0			0									0						0	28	0
Charadriiformes	Scolopacidae	Calidris	Calidris falcinellus								0										0.181818								0		0					2	38	0.0526316	0.0145542	0.172855
Charadriiformes	Scolopacidae	Calidris	Calidris ruficollis							0											0								0	1	0					3	96	0.03125	0.0106841	0.0878868
Charadriiformes	Scolopacidae	Calidris	Calidris subminuta								0																		0.105263							2	20	0.1	0.0278665	0.301034
Charadriiformes	Scolopacidae	Calidris	Calidris tenuirostris	0					0	0							0				0.157895									0.784314						43	365	0.117808	0.0886487	0.154929
Charadriiformes	Scolopacidae	Gallinago	Gallinago gallinago		0																								0							0	3	0
Charadriiformes	Scolopacidae	Gallinago	Gallinago megala																												0					0	1	0
Charadriiformes	Scolopacidae	Limosa	Limosa lapponica	0					0	0	0.5						0				0									0						3	80	0.0375	0.0128346	0.104547
Charadriiformes	Scolopacidae	Limosa	Limosa limosa								0										0									0.4						2	40	0.05	0.0138207	0.165039
Charadriiformes	Scolopacidae	Numenius	Numenius phaeopus	0						0	0						0	0			0								0	1						20	49	0.408163	0.282152	0.547527
Charadriiformes	Scolopacidae	Scolopax	Scolopax rusticola														0					0								0	0					0	6	0
Charadriiformes	Scolopacidae	Tringa	Tringa brevipes														0				0								0							0	7	0
Charadriiformes	Scolopacidae	Tringa	Tringa erythropus		0																									0						0	5	0
Charadriiformes	Scolopacidae	Tringa	Tringa glareola								0									0	0								0							0	10	0
Charadriiformes	Scolopacidae	Tringa	Tringa nebularia								0						0	0		0	0								0.333333							3	22	0.136364	0.04749	0.33335
Charadriiformes	Scolopacidae	Tringa	Tringa stagnatilis								0										0								0		0					0	12	0
Charadriiformes	Scolopacidae	Tringa	Tringa totanus	0							0						0	0		0	0.0833333								0.125	1						7	62	0.112903	0.0557786	0.215197
Charadriiformes	Scolopacidae	Xenus	Xenus cinereus	0						0	0						0	0		0	0								0	1						3	66	0.0454545	0.0155783	0.125333
Ciconiiformes	Ciconiidae	Ciconia	Ciconia boyciana											0																						0	2	0
Columbiformes	Columbidae	Spilopelia	Spilopelia chinensis			0														0	0		0					0		0	0					0	9	0
Columbiformes	Columbidae	Streptopelia	Streptopelia orientalis			0																														0	3	0
Falconiformes	Falconidae	Falco	Falco peregrinus										0									0											0			0	4	0
Falconiformes	Falconidae	Falco	Falco tinnunculus										0						0	0	0		0					0		0	0		0			0	12	0
Gruiformes	Gruidae	Grus	Grus nigricollis											0																						0	5	0
Gruiformes	Rallidae	Fulica	Fulica atra		0	0	0						0		0								0	0	0	0						0				0	42	0
Gruiformes	Rallidae	Gallinula	Gallinula chloropus		0	0	0																													0	39	0
Gruiformes	Rallidae	Rallus	Rallus indicus		0																															0	3	0
Passeriformes	Alaudidae	Alauda	Alauda arvensis																													0				0	1	0
Passeriformes	Fringillidae	Eophona	Eophona migratoria																											0						0	2	0
Passeriformes	Laniidae	Lanius	Lanius schach																	0																0	1	0
Passeriformes	Muscicapidae	Calliope	Calliope calliope																				0													0	1	0
Passeriformes	Muscicapidae	Luscinia	Luscinia megarhynchos												0								0							0						0	3	0
Passeriformes	Phylloscopidae	Phylloscopus	Phylloscopus trochilus																				0													0	1	0
Passeriformes	Pittidae	Pitta	Pitta nympha																		0									0	0					0	5	0
Passeriformes	Pycnonotidae	Pycnonotus	Pycnonotus sinensis																0																	0	1	0
Passeriformes	Turdidae	Geokichla	Geokichla sibirica			0																														0	4	0
Passeriformes	Turdidae	Turdus	Turdus pallidus			0								0																						0	7	0
Passeriformes	Turdidae	Zoothera	Zoothera aurea																				0				0				0					0	6	0
Pelecaniformes	Ardeidae	Ardea	Ardea alba																							0										0	1	0
Pelecaniformes	Ardeidae	Ardea	Ardea cinerea											0								0	0	0			0				0	0	0			0	23	0
Pelecaniformes	Ardeidae	Ardea	Ardea modesta																				1													3	3	1	0.438503	1
Pelecaniformes	Ardeidae	Bubulcus	Bubulcus ibis																											0.5						1	2	0.5	0.0945312	0.905469
Pelecaniformes	Ardeidae	Egretta	Egretta garzetta											0	0				0.4			0	0	0			0	0.5	0	0.5	0	0	0			4	26	0.153846	0.0615003	0.335312
Pelecaniformes	Ardeidae	Ixobrychus	Ixobrychus sinensis																											0						0	1	0
Pelecaniformes	Ardeidae	Nycticorax	Nycticorax nycticorax											0	0				0	0	0	0	0	0	0			0	0	0.142857	0.2	0	0			2	51	0.0392157	0.0108211	0.132163
Pelecaniformes	Pelecanidae	Pelecanus	Pelecanus crispus											0																						0	4	0
Pelecaniformes	Threskiornithidae	Platalea	Platalea leucorodia																				0													0	4	0
Pelecaniformes	Threskiornithidae	Threskiorni	Threskiornis melanocephalus											0																						0	2	0
Phoenicopteriformes	Phoenicopteridae	Phoenicopterus	Phoenicopterus ruber											0																						0	12	0
Podicipediformes	Podicipedidae	Tachybaptus	Tachybaptus ruficollis																					0												0	1	0
Strigiformes	Strigidae	Asio	Asio otus			0	0																													0	6	0
Strigiformes	Strigidae	Otus	Otus scops																				0								0	0				0	4	0
Strigiformes	Strigidae	Otus	Otus sunia																			0								0						0	3	0
Suliformes	Phalacrocoracidae	Phalacrocorax	Phalacrocorax carbo																													0				0	1	0

## Sheet: TableS5
Table S5 Sequence Information for Gammacoronavirus and Deltacoronavirus
Sequence Source	Accession	From RdRp	Length	complete	refseq	collection_date(original)	country	province	city	Isolation_source	organism	isolate	Strain	host(original)	host_Order	host_Family	host_Genus	host_Species	Migratory Bird	virus_family	virus_subfamily	virus_genus	virus_subgenus	virus_species	virus_species(Abbrev.)	virus_species(Abbrev.)2
In this study	PP845503	PP845817	26283	complete genome		2021-11-23	China	Shanghai	Shanghai	Cloacal swabs					Anseriformes	Anatidae	Mareca	Mareca penelope		Coronaviridae	Orthocoronavirinae	Deltacoronavirus	Andecovirus	Deltacoronavirus_marecae	WiCoV_HKU20	Delta_HKU20
In this study	PP845501	PP845797	25975	complete genome		2020-11-19	China	Shanghai	Shanghai	Cloacal swabs					Anseriformes	Anatidae	Anas	Anas zonorhyncha	yes	Coronaviridae	Orthocoronavirinae	Deltacoronavirus	Andecovirus	Deltacoronavirus_anatis(NL1)	DuCoV_NL1	Delta_NL1
In this study	PP845502	PP845802	26011	complete genome		2021-11-14	China	Shanghai	Shanghai	Cloacal swabs					Anseriformes	Anatidae	Anas	Anas crecca	yes	Coronaviridae	Orthocoronavirinae	Deltacoronavirus	Andecovirus	Deltacoronavirus_anatis(NL1)	DuCoV_NL1	Delta_NL1
In this study	PP845476	PP845794	26110	complete genome		2022-10-09	China	Shanghai	Shanghai	Cloacal swabs					Pelecaniformes	Ardeidae	Nycticorax	Nycticorax nycticorax	yes	Coronaviridae	Orthocoronavirinae	Deltacoronavirus	Herdecovirus	Deltacoronavirus_nycticoracis	NHCoV_HKU19	Delta_HKU19
In this study	PP845475	PP845788	26108	complete genome		2022-09-20	China	Shanghai	Shanghai	feces					Pelecaniformes	Ardeidae	Bubulcus	Bubulcus ibis	yes	Coronaviridae	Orthocoronavirinae	Deltacoronavirus	Herdecovirus	Deltacoronavirus_nycticoracis	NHCoV_HKU19	Delta_HKU19
In this study	PP845473	PP845787	26108	complete genome		2021-07-28	China	Shanghai	Shanghai	Cloacal swabs					Pelecaniformes	Ardeidae	Egretta	Egretta garzetta	yes	Coronaviridae	Orthocoronavirinae	Deltacoronavirus	Herdecovirus	Deltacoronavirus_nycticoracis	NHCoV_HKU19	Delta_HKU19
In this study	PP845471	PP845786	26108	complete genome		2021-07-30	China	Shanghai	Shanghai	tissue					Pelecaniformes	Ardeidae	Egretta	Egretta garzetta	yes	Coronaviridae	Orthocoronavirinae	Deltacoronavirus	Herdecovirus	Deltacoronavirus_nycticoracis	NHCoV_HKU19	Delta_HKU19
In this study	PP845472	PP845784	26102	complete genome		2021-07-30	China	Shanghai	Shanghai	tissue					Pelecaniformes	Ardeidae	Egretta	Egretta garzetta	yes	Coronaviridae	Orthocoronavirinae	Deltacoronavirus	Herdecovirus	Deltacoronavirus_nycticoracis	NHCoV_HKU19	Delta_HKU19
In this study	PP845474	PP845792	26108	complete genome		2022-09-20	China	Shanghai	Shanghai	tissue					Pelecaniformes	Ardeidae	Egretta	Egretta garzetta	yes	Coronaviridae	Orthocoronavirinae	Deltacoronavirus	Herdecovirus	Deltacoronavirus_nycticoracis	NHCoV_HKU19	Delta_HKU19
In this study	PP845485	PP845779	26097	complete genome		2022-09-19	China	Shanghai	Shanghai	feces					Charadriiformes	Scolopacidae	Calidris	Calidris tenuirostris	yes	Coronaviridae	Orthocoronavirinae	Deltacoronavirus	Buldecovirus	Deltacoronavirus_Sandpipers(NL2)	SandCoV_NL2	Delta_NL2
In this study	PP845486	PP845780	26002	complete genome		2022-09-19	China	Shanghai	Shanghai	feces					Charadriiformes	Scolopacidae	Calidris	Calidris tenuirostris	yes	Coronaviridae	Orthocoronavirinae	Deltacoronavirus	Buldecovirus	Deltacoronavirus_Sandpipers(NL2)	SandCoV_NL2	Delta_NL2
In this study	PP845477	PP845781	26258	complete genome		2021-04-21	China	Shanghai	Shanghai	Cloacal swabs					Charadriiformes	Charadriidae	Pluvialis	Pluvialis squatarola	yes	Coronaviridae	Orthocoronavirinae	Deltacoronavirus	Buldecovirus	Deltacoronavirus_Sandpipers(NL2)	SandCoV_NL2	Delta_NL2
In this study	PP845497	PP845767	25974	complete genome		2022-08-23	China	Shanghai	Shanghai	Cloacal swabs					Charadriiformes	Scolopacidae	Calidris	Calidris subminuta	yes	Coronaviridae	Orthocoronavirinae	Deltacoronavirus	Buldecovirus	Deltacoronavirus_Sandpipers(NL2)	SandCoV_NL2	Delta_NL2
In this study	PP845495	PP845778	25979	complete genome		2022-09-19	China	Shanghai	Shanghai	feces					Charadriiformes	Scolopacidae	Calidris	Calidris tenuirostris	yes	Coronaviridae	Orthocoronavirinae	Deltacoronavirus	Buldecovirus	Deltacoronavirus_Sandpipers(NL2)	SandCoV_NL2	Delta_NL2
In this study	PP845487	PP845776	26099	complete genome		2022-09-19	China	Shanghai	Shanghai	feces					Charadriiformes	Scolopacidae	Calidris	Calidris tenuirostris	yes	Coronaviridae	Orthocoronavirinae	Deltacoronavirus	Buldecovirus	Deltacoronavirus_Sandpipers(NL2)	SandCoV_NL2	Delta_NL2
In this study	PP845488	PP845768	26099	complete genome		2022-09-19	China	Shanghai	Shanghai	feces					Charadriiformes	Scolopacidae	Calidris	Calidris tenuirostris	yes	Coronaviridae	Orthocoronavirinae	Deltacoronavirus	Buldecovirus	Deltacoronavirus_Sandpipers(NL2)	SandCoV_NL2	Delta_NL2
In this study	PP845489	PP845769	26099	complete genome		2022-09-19	China	Shanghai	Shanghai	feces					Charadriiformes	Scolopacidae	Calidris	Calidris tenuirostris	yes	Coronaviridae	Orthocoronavirinae	Deltacoronavirus	Buldecovirus	Deltacoronavirus_Sandpipers(NL2)	SandCoV_NL2	Delta_NL2
In this study	PP845490	PP845770	26099	complete genome		2022-09-19	China	Shanghai	Shanghai	feces					Charadriiformes	Scolopacidae	Calidris	Calidris tenuirostris	yes	Coronaviridae	Orthocoronavirinae	Deltacoronavirus	Buldecovirus	Deltacoronavirus_Sandpipers(NL2)	SandCoV_NL2	Delta_NL2
In this study	PP845491	PP845771	26099	complete genome		2022-09-19	China	Shanghai	Shanghai	feces					Charadriiformes	Scolopacidae	Calidris	Calidris tenuirostris	yes	Coronaviridae	Orthocoronavirinae	Deltacoronavirus	Buldecovirus	Deltacoronavirus_Sandpipers(NL2)	SandCoV_NL2	Delta_NL2
In this study	PP845496	PP845772	26096	complete genome		2022-09-19	China	Shanghai	Shanghai	feces					Charadriiformes	Scolopacidae	Calidris	Calidris tenuirostris	yes	Coronaviridae	Orthocoronavirinae	Deltacoronavirus	Buldecovirus	Deltacoronavirus_Sandpipers(NL2)	SandCoV_NL2	Delta_NL2
In this study	PP845492	PP845773	26099	complete genome		2022-09-19	China	Shanghai	Shanghai	feces					Charadriiformes	Scolopacidae	Calidris	Calidris tenuirostris	yes	Coronaviridae	Orthocoronavirinae	Deltacoronavirus	Buldecovirus	Deltacoronavirus_Sandpipers(NL2)	SandCoV_NL2	Delta_NL2
In this study	PP845493	PP845774	26099	complete genome		2022-09-19	China	Shanghai	Shanghai	feces					Charadriiformes	Scolopacidae	Calidris	Calidris tenuirostris	yes	Coronaviridae	Orthocoronavirinae	Deltacoronavirus	Buldecovirus	Deltacoronavirus_Sandpipers(NL2)	SandCoV_NL2	Delta_NL2
In this study	PP845494	PP845775	26099	complete genome		2022-09-19	China	Shanghai	Shanghai	feces					Charadriiformes	Scolopacidae	Calidris	Calidris tenuirostris	yes	Coronaviridae	Orthocoronavirinae	Deltacoronavirus	Buldecovirus	Deltacoronavirus_Sandpipers(NL2)	SandCoV_NL2	Delta_NL2
In this study	PP845478	PP845766	26053	complete genome		2021-08-27	China	Shanghai	Shanghai	Cloacal swabs					Charadriiformes	Scolopacidae	Arenaria	Arenaria interpres	yes	Coronaviridae	Orthocoronavirinae	Deltacoronavirus	Buldecovirus	Deltacoronavirus_Sandpipers(NL2)	SandCoV_NL2	Delta_NL2
In this study	PP845479	PP845759	25788	complete genome		2021-09-06	China	Shanghai	Shanghai	Cloacal swabs					Charadriiformes	Scolopacidae	Calidris	Calidris tenuirostris	yes	Coronaviridae	Orthocoronavirinae	Deltacoronavirus	Buldecovirus	Deltacoronavirus_Sandpipers(NL2)	SandCoV_NL2	Delta_NL2
In this study	PP845480	PP845760	25788	complete genome		2021-09-06	China	Shanghai	Shanghai	Cloacal swabs					Charadriiformes	Scolopacidae	Calidris	Calidris tenuirostris	yes	Coronaviridae	Orthocoronavirinae	Deltacoronavirus	Buldecovirus	Deltacoronavirus_Sandpipers(NL2)	SandCoV_NL2	Delta_NL2
In this study	PP845481	PP845761	25783	complete genome		2022-09-19	China	Shanghai	Shanghai	feces					Charadriiformes	Scolopacidae	Calidris	Calidris tenuirostris	yes	Coronaviridae	Orthocoronavirinae	Deltacoronavirus	Buldecovirus	Deltacoronavirus_Sandpipers(NL2)	SandCoV_NL2	Delta_NL2
In this study	PP845482	PP845762	25783	complete genome		2022-09-19	China	Shanghai	Shanghai	feces					Charadriiformes	Scolopacidae	Calidris	Calidris tenuirostris	yes	Coronaviridae	Orthocoronavirinae	Deltacoronavirus	Buldecovirus	Deltacoronavirus_Sandpipers(NL2)	SandCoV_NL2	Delta_NL2
In this study	PP845484	PP845763	25783	complete genome		2022-09-19	China	Shanghai	Shanghai	feces					Charadriiformes	Scolopacidae	Calidris	Calidris tenuirostris	yes	Coronaviridae	Orthocoronavirinae	Deltacoronavirus	Buldecovirus	Deltacoronavirus_Sandpipers(NL2)	SandCoV_NL2	Delta_NL2
In this study	PP845483	PP845764	25782	complete genome		2022-09-22	China	Shanghai	Shanghai	Cloacal swabs					Charadriiformes	Scolopacidae	Calidris	Calidris tenuirostris	yes	Coronaviridae	Orthocoronavirinae	Deltacoronavirus	Buldecovirus	Deltacoronavirus_Sandpipers(NL2)	SandCoV_NL2	Delta_NL2
In this study	PP845500	PP845753	26177	complete genome		2022-09-23	China	Shanghai	Shanghai	Cloacal swabs					Charadriiformes	Charadriidae	Charadrius	Charadrius leschenaultii	yes	Coronaviridae	Orthocoronavirinae	Deltacoronavirus	Buldecovirus	Deltacoronavirus_zosteropis	WECoV_HKU16	Delta_HKU16
In this study	PP845498	PP845755	26209	complete genome		2022-09-09	China	Shanghai	Shanghai	feces					Charadriiformes	Charadriidae	Charadrius	Charadrius alexandrinus	yes	Coronaviridae	Orthocoronavirinae	Deltacoronavirus	Buldecovirus	Deltacoronavirus_zosteropis	WECoV_HKU16	Delta_HKU16
In this study	PP845499	PP845754	26209	complete genome		2022-09-09	China	Shanghai	Shanghai	feces					Charadriiformes	Scolopacidae	Calidris	Calidris ruficollis	yes	Coronaviridae	Orthocoronavirinae	Deltacoronavirus	Buldecovirus	Deltacoronavirus_zosteropis	WECoV_HKU16	Delta_HKU16
In this study	PP845468	PP845724	27158	complete genome		2022-09-07	China	Shanghai	Shanghai	feces					Charadriiformes	Scolopacidae	Tringa	Tringa totanus	yes	Coronaviridae	Orthocoronavirinae	Gammacoronavirus	Igacovirus	Gammacoronavirus_Anatiscopes(NL3)	DuCoV_NL3	Gamma_NL3
In this study	PP845379	PP845716	29236	complete genome		2020-11-02	China	Shanghai	Shanghai	Cloacal swabs					Anseriformes	Anatidae	Anas	Anas crecca	yes	Coronaviridae	Orthocoronavirinae	Gammacoronavirus	Igacovirus	Gammacoronavirus_Anatiscopes(NL3)	DuCoV_NL3	Gamma_NL3
In this study	PP845383	PP845717	29235	complete genome		2021-11-11	China	Shanghai	Shanghai	feces					Anseriformes	Anatidae	Anas	Anas crecca	yes	Coronaviridae	Orthocoronavirinae	Gammacoronavirus	Igacovirus	Gammacoronavirus_Anatiscopes(NL3)	DuCoV_NL3	Gamma_NL3
In this study	PP845382	PP845714	29235	complete genome		2020-10-31	China	Shanghai	Shanghai	Cloacal swabs					Anseriformes	Anatidae	Anas	Anas crecca	yes	Coronaviridae	Orthocoronavirinae	Gammacoronavirus	Igacovirus	Gammacoronavirus_Anatiscopes(NL3)	DuCoV_NL3	Gamma_NL3
In this study	PP845421	PP845679	28458	complete genome		2021-11-18	China	Shanghai	Shanghai	Cloacal swabs					Anseriformes	Anatidae	Anas	Anas zonorhyncha	yes	Coronaviridae	Orthocoronavirinae	Gammacoronavirus	Igacovirus	Gammacoronavirus_Anatiscopes(NL3)	DuCoV_NL3	Gamma_NL3
In this study	PP845422	PP845680	28456	complete genome		2021-11-18	China	Shanghai	Shanghai	Cloacal swabs					Anseriformes	Anatidae	Anas	Anas zonorhyncha	yes	Coronaviridae	Orthocoronavirinae	Gammacoronavirus	Igacovirus	Gammacoronavirus_Anatiscopes(NL3)	DuCoV_NL3	Gamma_NL3
In this study	PP845384	PP845660	29229	complete genome		2019-11-11	China	Shanghai	Shanghai	Cloacal swabs					Anseriformes	Anatidae	Anas	Anas crecca	yes	Coronaviridae	Orthocoronavirinae	Gammacoronavirus	Igacovirus	Gammacoronavirus_Anatiscopes(NL3)	DuCoV_NL3	Gamma_NL3
In this study	PP845380	PP845659	29233	complete genome		2020-11-02	China	Shanghai	Shanghai	Cloacal swabs					Anseriformes	Anatidae	Anas	Anas crecca	yes	Coronaviridae	Orthocoronavirinae	Gammacoronavirus	Igacovirus	Gammacoronavirus_Anatiscopes(NL3)	DuCoV_NL3	Gamma_NL3
In this study	PP845381	PP845667	29236	complete genome		2020-11-02	China	Shanghai	Shanghai	Cloacal swabs					Anseriformes	Anatidae	Anas	Anas crecca	yes	Coronaviridae	Orthocoronavirinae	Gammacoronavirus	Igacovirus	Gammacoronavirus_Anatiscopes(NL3)	DuCoV_NL3	Gamma_NL3
In this study	PP845467	PP845705	27416	complete genome		2022-09-09	China	Shanghai	Shanghai	feces					Charadriiformes	Charadriidae	Charadrius	Charadrius alexandrinus	yes	Coronaviridae	Orthocoronavirinae	Gammacoronavirus	Igacovirus	Gammacoronavirus_Anatiscopes(NL3)	DuCoV_NL3	Gamma_NL3
In this study	PP845406	PP845642	28314	complete genome		2022-11-17	China	Shanghai	Shanghai	Cloacal swabs					Anseriformes	Anatidae	Anas	Anas zonorhyncha	yes	Coronaviridae	Orthocoronavirinae	Gammacoronavirus	Igacovirus	Gammacoronavirus_Anatiscopes(NL3)	DuCoV_NL3	Gamma_NL3
In this study	PP845407	PP845643	28272	complete genome		2022-11-21	China	Shanghai	Shanghai	Cloacal swabs					Anseriformes	Anatidae	Anas	Anas acuta	yes	Coronaviridae	Orthocoronavirinae	Gammacoronavirus	Igacovirus	Gammacoronavirus_Anatiscopes(NL3)	DuCoV_NL3	Gamma_NL3
In this study	PP845469	PP845672	27425	complete genome		2020-09-24	China	Shanghai	Shanghai	Cloacal swabs					Charadriiformes	Scolopacidae	Limosa	Limosa lapponica	yes	Coronaviridae	Orthocoronavirinae	Gammacoronavirus	Igacovirus	Gammacoronavirus_Anatiscopes(NL3)	DuCoV_NL3	Gamma_NL3
In this study	PP845470	PP845673	27425	complete genome		2020-09-24	China	Shanghai	Shanghai	Cloacal swabs					Charadriiformes	Scolopacidae	Limosa	Limosa lapponica	yes	Coronaviridae	Orthocoronavirinae	Gammacoronavirus	Igacovirus	Gammacoronavirus_Anatiscopes(NL3)	DuCoV_NL3	Gamma_NL3
In this study	PP845393	PP845653	28664	complete genome		2022-11-15	China	Shanghai	Shanghai	Cloacal swabs					Anseriformes	Anatidae	Anas	Anas platyrhynchos	yes	Coronaviridae	Orthocoronavirinae	Gammacoronavirus	Igacovirus	Gammacoronavirus_Anatiscopes(NL3)	DuCoV_NL3	Gamma_NL3
In this study	PP845434	PP845572	28458	complete genome		2020-12-02	China	Shanghai	Shanghai	Cloacal swabs					Anseriformes	Anatidae	Anas	Anas platyrhynchos	yes	Coronaviridae	Orthocoronavirinae	Gammacoronavirus	Igacovirus	Gammacoronavirus_Anatiscopes(NL3)	DuCoV_NL3	Gamma_NL3
In this study	PP845390	PP845649	28664	complete genome		2020-12-02	China	Shanghai	Shanghai	Cloacal swabs					Anseriformes	Anatidae	Anas	Anas zonorhyncha	yes	Coronaviridae	Orthocoronavirinae	Gammacoronavirus	Igacovirus	Gammacoronavirus_Anatiscopes(NL3)	DuCoV_NL3	Gamma_NL3
In this study	PP845392	PP845574	28669	complete genome		2020-12-02	China	Shanghai	Shanghai	Cloacal swabs					Anseriformes	Anatidae	Anas	Anas platyrhynchos	yes	Coronaviridae	Orthocoronavirinae	Gammacoronavirus	Igacovirus	Gammacoronavirus_Anatiscopes(NL3)	DuCoV_NL3	Gamma_NL3
In this study	PP845391	PP845575	28664	complete genome		2020-12-04	China	Shanghai	Shanghai	Cloacal swabs					Anseriformes	Anatidae	Anas	Anas zonorhyncha	yes	Coronaviridae	Orthocoronavirinae	Gammacoronavirus	Igacovirus	Gammacoronavirus_Anatiscopes(NL3)	DuCoV_NL3	Gamma_NL3
In this study	PP845432	PP845570	28459	complete genome		2020-11-19	China	Shanghai	Shanghai	Cloacal swabs					Anseriformes	Anatidae	Anas	Anas zonorhyncha	yes	Coronaviridae	Orthocoronavirinae	Gammacoronavirus	Igacovirus	Gammacoronavirus_Anatiscopes(NL3)	DuCoV_NL3	Gamma_NL3
In this study	PP845455	PP845734	27304	complete genome		2022-09-19	China	Shanghai	Shanghai	feces					Charadriiformes	Scolopacidae	Calidris	Calidris tenuirostris	yes	Coronaviridae	Orthocoronavirinae	Gammacoronavirus	Igacovirus	Gammacoronavirus_Anatiscopes(NL3)	DuCoV_NL3	Gamma_NL3
In this study	PP845460	PP845726	27304	complete genome		2022-09-19	China	Shanghai	Shanghai	feces					Charadriiformes	Scolopacidae	Calidris	Calidris tenuirostris	yes	Coronaviridae	Orthocoronavirinae	Gammacoronavirus	Igacovirus	Gammacoronavirus_Anatiscopes(NL3)	DuCoV_NL3	Gamma_NL3
In this study	PP845459	PP845727	27304	complete genome		2022-09-19	China	Shanghai	Shanghai	feces					Charadriiformes	Scolopacidae	Calidris	Calidris tenuirostris	yes	Coronaviridae	Orthocoronavirinae	Gammacoronavirus	Igacovirus	Gammacoronavirus_Anatiscopes(NL3)	DuCoV_NL3	Gamma_NL3
In this study	PP845463	PP845728	27304	complete genome		2022-09-19	China	Shanghai	Shanghai	feces					Charadriiformes	Scolopacidae	Calidris	Calidris tenuirostris	yes	Coronaviridae	Orthocoronavirinae	Gammacoronavirus	Igacovirus	Gammacoronavirus_Anatiscopes(NL3)	DuCoV_NL3	Gamma_NL3
In this study	PP845461	PP845735	27304	complete genome		2022-09-19	China	Shanghai	Shanghai	feces					Charadriiformes	Scolopacidae	Calidris	Calidris tenuirostris	yes	Coronaviridae	Orthocoronavirinae	Gammacoronavirus	Igacovirus	Gammacoronavirus_Anatiscopes(NL3)	DuCoV_NL3	Gamma_NL3
In this study	PP845464	PP845729	27293	complete genome		2022-09-19	China	Shanghai	Shanghai	feces					Charadriiformes	Scolopacidae	Calidris	Calidris tenuirostris	yes	Coronaviridae	Orthocoronavirinae	Gammacoronavirus	Igacovirus	Gammacoronavirus_Anatiscopes(NL3)	DuCoV_NL3	Gamma_NL3
In this study	PP845456	PP845730	27304	complete genome		2022-09-19	China	Shanghai	Shanghai	feces					Charadriiformes	Scolopacidae	Calidris	Calidris tenuirostris	yes	Coronaviridae	Orthocoronavirinae	Gammacoronavirus	Igacovirus	Gammacoronavirus_Anatiscopes(NL3)	DuCoV_NL3	Gamma_NL3
In this study	PP845458	PP845731	27304	complete genome		2022-09-19	China	Shanghai	Shanghai	feces					Charadriiformes	Scolopacidae	Calidris	Calidris tenuirostris	yes	Coronaviridae	Orthocoronavirinae	Gammacoronavirus	Igacovirus	Gammacoronavirus_Anatiscopes(NL3)	DuCoV_NL3	Gamma_NL3
In this study	PP845457	PP845732	27304	complete genome		2022-09-19	China	Shanghai	Shanghai	feces					Charadriiformes	Scolopacidae	Calidris	Calidris tenuirostris	yes	Coronaviridae	Orthocoronavirinae	Gammacoronavirus	Igacovirus	Gammacoronavirus_Anatiscopes(NL3)	DuCoV_NL3	Gamma_NL3
In this study	PP845462	PP845733	27308	complete genome		2022-09-19	China	Shanghai	Shanghai	feces					Charadriiformes	Scolopacidae	Calidris	Calidris tenuirostris	yes	Coronaviridae	Orthocoronavirinae	Gammacoronavirus	Igacovirus	Gammacoronavirus_Anatiscopes(NL3)	DuCoV_NL3	Gamma_NL3
In this study	PP845465	PP845725	27301	complete genome		2023-04-25	China	Shanghai	Shanghai	Cloacal swabs					Charadriiformes	Scolopacidae	Arenaria	Arenaria interpres	yes	Coronaviridae	Orthocoronavirinae	Gammacoronavirus	Igacovirus	Gammacoronavirus_Anatiscopes(NL3)	DuCoV_NL3	Gamma_NL3
In this study	PP845449	PP845742	27435	complete genome		2022-09-07	China	Shanghai	Shanghai	feces					Charadriiformes	Scolopacidae	Numenius	Numenius phaeopus	yes	Coronaviridae	Orthocoronavirinae	Gammacoronavirus	Igacovirus	Gammacoronavirus_Anatiscopes(NL3)	DuCoV_NL3	Gamma_NL3
In this study	PP845450	PP845749	27438	complete genome		2022-09-07	China	Shanghai	Shanghai	feces					Charadriiformes	Scolopacidae	Numenius	Numenius phaeopus	yes	Coronaviridae	Orthocoronavirinae	Gammacoronavirus	Igacovirus	Gammacoronavirus_Anatiscopes(NL3)	DuCoV_NL3	Gamma_NL3
In this study	PP845451	PP845743	27435	complete genome		2022-09-07	China	Shanghai	Shanghai	feces					Charadriiformes	Scolopacidae	Numenius	Numenius phaeopus	yes	Coronaviridae	Orthocoronavirinae	Gammacoronavirus	Igacovirus	Gammacoronavirus_Anatiscopes(NL3)	DuCoV_NL3	Gamma_NL3
In this study	PP845454	PP845744	27435	complete genome		2022-09-07	China	Shanghai	Shanghai	feces					Charadriiformes	Scolopacidae	Numenius	Numenius phaeopus	yes	Coronaviridae	Orthocoronavirinae	Gammacoronavirus	Igacovirus	Gammacoronavirus_Anatiscopes(NL3)	DuCoV_NL3	Gamma_NL3
In this study	PP845453	PP845745	27435	complete genome		2022-09-07	China	Shanghai	Shanghai	feces					Charadriiformes	Scolopacidae	Xenus	Xenus cinereus	yes	Coronaviridae	Orthocoronavirinae	Gammacoronavirus	Igacovirus	Gammacoronavirus_Anatiscopes(NL3)	DuCoV_NL3	Gamma_NL3
In this study	PP845452	PP845746	27435	complete genome		2022-09-07	China	Shanghai	Shanghai	feces					Charadriiformes	Scolopacidae	Numenius	Numenius phaeopus	yes	Coronaviridae	Orthocoronavirinae	Gammacoronavirus	Igacovirus	Gammacoronavirus_Anatiscopes(NL3)	DuCoV_NL3	Gamma_NL3
In this study	PP845416	PP845585	28452	complete genome		2020-12-02	China	Shanghai	Shanghai	Cloacal swabs					Anseriformes	Anatidae	Anas	Anas platyrhynchos	yes	Coronaviridae	Orthocoronavirinae	Gammacoronavirus	Igacovirus	Gammacoronavirus_Anatiscopes(NL3)	DuCoV_NL3	Gamma_NL3
In this study	PP845418	PP845586	28451	complete genome		2020-12-04	China	Shanghai	Shanghai	Cloacal swabs					Anseriformes	Anatidae	Anas	Anas platyrhynchos	yes	Coronaviridae	Orthocoronavirinae	Gammacoronavirus	Igacovirus	Gammacoronavirus_Anatiscopes(NL3)	DuCoV_NL3	Gamma_NL3
In this study	PP845417	PP845587	28453	complete genome		2020-12-04	China	Shanghai	Shanghai	Cloacal swabs					Anseriformes	Anatidae	Anas	Anas platyrhynchos	yes	Coronaviridae	Orthocoronavirinae	Gammacoronavirus	Igacovirus	Gammacoronavirus_Anatiscopes(NL3)	DuCoV_NL3	Gamma_NL3
In this study	PP845412	PP845581	28453	complete genome		2020-11-19	China	Shanghai	Shanghai	Cloacal swabs					Anseriformes	Anatidae	Anas	Anas zonorhyncha	yes	Coronaviridae	Orthocoronavirinae	Gammacoronavirus	Igacovirus	Gammacoronavirus_Anatiscopes(NL3)	DuCoV_NL3	Gamma_NL3
In this study	PP845413	PP845582	28453	complete genome		2020-12-02	China	Shanghai	Shanghai	Cloacal swabs					Anseriformes	Anatidae	Anas	Anas zonorhyncha	yes	Coronaviridae	Orthocoronavirinae	Gammacoronavirus	Igacovirus	Gammacoronavirus_Anatiscopes(NL3)	DuCoV_NL3	Gamma_NL3
In this study	PP845414	PP845583	28453	complete genome		2020-12-02	China	Shanghai	Shanghai	Cloacal swabs					Anseriformes	Anatidae	Anas	Anas platyrhynchos	yes	Coronaviridae	Orthocoronavirinae	Gammacoronavirus	Igacovirus	Gammacoronavirus_Anatiscopes(NL3)	DuCoV_NL3	Gamma_NL3
In this study	PP845415	PP845584	28453	complete genome		2020-12-04	China	Shanghai	Shanghai	Cloacal swabs					Anseriformes	Anatidae	Anas	Anas platyrhynchos	yes	Coronaviridae	Orthocoronavirinae	Gammacoronavirus	Igacovirus	Gammacoronavirus_Anatiscopes(NL3)	DuCoV_NL3	Gamma_NL3
In this study	PP845409	PP845683	28453	complete genome		2019-11-11	China	Shanghai	Shanghai	Cloacal swabs					Anseriformes	Anatidae	Anas	Anas platyrhynchos	yes	Coronaviridae	Orthocoronavirinae	Gammacoronavirus	Igacovirus	Gammacoronavirus_Anatiscopes(NL3)	DuCoV_NL3	Gamma_NL3
In this study	PP845419	PP845688	28450	complete genome		2021-11-23	China	Shanghai	Shanghai	Cloacal swabs					Anseriformes	Anatidae	Anas	Anas zonorhyncha	yes	Coronaviridae	Orthocoronavirinae	Gammacoronavirus	Igacovirus	Gammacoronavirus_Anatiscopes(NL3)	DuCoV_NL3	Gamma_NL3
In this study	PP845420	PP845689	28450	complete genome		2021-11-23	China	Shanghai	Shanghai	Cloacal swabs					Anseriformes	Anatidae	Mareca	Mareca penelope		Coronaviridae	Orthocoronavirinae	Gammacoronavirus	Igacovirus	Gammacoronavirus_Anatiscopes(NL3)	DuCoV_NL3	Gamma_NL3
In this study	PP845410	PP845686	28453	complete genome		2019-10-29	China	Shanghai	Shanghai	Cloacal swabs					Anseriformes	Anatidae	Anas	Anas platyrhynchos	yes	Coronaviridae	Orthocoronavirinae	Gammacoronavirus	Igacovirus	Gammacoronavirus_Anatiscopes(NL3)	DuCoV_NL3	Gamma_NL3
In this study	PP845411	PP845687	28456	complete genome		2019-10-29	China	Shanghai	Shanghai	Cloacal swabs					Anseriformes	Anatidae	Anas	Anas zonorhyncha	yes	Coronaviridae	Orthocoronavirinae	Gammacoronavirus	Igacovirus	Gammacoronavirus_Anatiscopes(NL3)	DuCoV_NL3	Gamma_NL3
In this study	PP845408	PP845706	28485	complete genome		2022-11-19	China	Shanghai	Shanghai	Cloacal swabs					Anseriformes	Anatidae	Anas	Anas acuta	yes	Coronaviridae	Orthocoronavirinae	Gammacoronavirus	Igacovirus	Gammacoronavirus_Anatiscopes(NL3)	DuCoV_NL3	Gamma_NL3
In this study	PP845405	NA	28248	complete genome		2023-01-11	China	Shanghai	Shanghai	Cloacal swabs					Anseriformes	Anatidae	Anas	Anas platyrhynchos	yes	Coronaviridae	Orthocoronavirinae	Gammacoronavirus	Igacovirus	Gammacoronavirus_Anatiscopes(NL3)	DuCoV_NL3	Gamma_NL3
In this study	PP845423	NA	28451	complete genome		2019-10-20	China	Shanghai	Shanghai	Cloacal swabs					Anseriformes	Anatidae	Anas	Anas zonorhyncha	yes	Coronaviridae	Orthocoronavirinae	Gammacoronavirus	Igacovirus	Gammacoronavirus_Anatiscopes(NL3)	DuCoV_NL3	Gamma_NL3
In this study	PP845424	PP845535	28451	complete genome		2023-01-11	China	Shanghai	Shanghai	Cloacal swabs					Anseriformes	Anatidae	Anas	Anas platyrhynchos	yes	Coronaviridae	Orthocoronavirinae	Gammacoronavirus	Igacovirus	Gammacoronavirus_Anatiscopes(NL3)	DuCoV_NL3	Gamma_NL3
In this study	PP845425	PP845704	28451	complete genome		2022-11-17	China	Shanghai	Shanghai	Cloacal swabs					Anseriformes	Anatidae	Anas	Anas zonorhyncha	yes	Coronaviridae	Orthocoronavirinae	Gammacoronavirus	Igacovirus	Gammacoronavirus_Anatiscopes(NL3)	DuCoV_NL3	Gamma_NL3
In this study	PP845427	NA	28451	complete genome		2022-11-24	China	Shanghai	Shanghai	Cloacal swabs					Anseriformes	Anatidae	Anas	Anas platyrhynchos	yes	Coronaviridae	Orthocoronavirinae	Gammacoronavirus	Igacovirus	Gammacoronavirus_Anatiscopes(NL3)	DuCoV_NL3	Gamma_NL3
In this study	PP845448	PP845504	28866	complete genome		2020-11-19	China	Shanghai	Shanghai	Cloacal swabs					Anseriformes	Anatidae	Anas	Anas zonorhyncha	yes	Coronaviridae	Orthocoronavirinae	Gammacoronavirus	Igacovirus	Gammacoronavirus_Anatiscopes(NL3)	DuCoV_NL3	Gamma_NL3
In this study	PP845440	PP845520	29018	complete genome		2021-11-11	China	Shanghai	Shanghai	Cloacal swabs					Anseriformes	Anatidae	Anas	Anas platyrhynchos	yes	Coronaviridae	Orthocoronavirinae	Gammacoronavirus	Igacovirus	Gammacoronavirus_Anatiscopes(NL3)	DuCoV_NL3	Gamma_NL3
In this study	PP845437	PP845517	29038	complete genome		2020-11-30	China	Shanghai	Shanghai	Cloacal swabs					Anseriformes	Anatidae	Anas	Anas platyrhynchos	yes	Coronaviridae	Orthocoronavirinae	Gammacoronavirus	Igacovirus	Gammacoronavirus_Anatiscopes(NL3)	DuCoV_NL3	Gamma_NL3
In this study	PP845439	PP845516	29455	complete genome		2021-11-11	China	Shanghai	Shanghai	feces					Anseriformes	Anatidae	Anas	Anas platyrhynchos	yes	Coronaviridae	Orthocoronavirinae	Gammacoronavirus	Igacovirus	Gammacoronavirus_Anatiscopes(NL3)	DuCoV_NL3	Gamma_NL3
In this study	PP845403	PP845645	28187	complete genome		2021-11-04	China	Shanghai	Shanghai	Cloacal swabs					Anseriformes	Anatidae	Anas	Anas zonorhyncha	yes	Coronaviridae	Orthocoronavirinae	Gammacoronavirus	Igacovirus	Gammacoronavirus_Anatiscopes(NL3)	DuCoV_NL3	Gamma_NL3
In this study	PP845404	PP845515	28187	complete genome		2021-11-07	China	Shanghai	Shanghai	Cloacal swabs					Anseriformes	Anatidae	Anas	Anas crecca	yes	Coronaviridae	Orthocoronavirinae	Gammacoronavirus	Igacovirus	Gammacoronavirus_Anatiscopes(NL3)	DuCoV_NL3	Gamma_NL3
In this study	PP845401	PP845509	28187	complete genome		2021-11-07	China	Shanghai	Shanghai	Cloacal swabs					Anseriformes	Anatidae	Anas	Anas crecca	yes	Coronaviridae	Orthocoronavirinae	Gammacoronavirus	Igacovirus	Gammacoronavirus_Anatiscopes(NL3)	DuCoV_NL3	Gamma_NL3
In this study	PP845398	PP845506	28185	complete genome		2021-11-07	China	Shanghai	Shanghai	Cloacal swabs					Anseriformes	Anatidae	Anas	Anas crecca	yes	Coronaviridae	Orthocoronavirinae	Gammacoronavirus	Igacovirus	Gammacoronavirus_Anatiscopes(NL3)	DuCoV_NL3	Gamma_NL3
In this study	PP845400	PP845507	28187	complete genome		2021-11-07	China	Shanghai	Shanghai	Cloacal swabs					Anseriformes	Anatidae	Anas	Anas crecca	yes	Coronaviridae	Orthocoronavirinae	Gammacoronavirus	Igacovirus	Gammacoronavirus_Anatiscopes(NL3)	DuCoV_NL3	Gamma_NL3
In this study	PP845399	PP845508	28187	complete genome		2021-11-07	China	Shanghai	Shanghai	Cloacal swabs					Anseriformes	Anatidae	Anas	Anas crecca	yes	Coronaviridae	Orthocoronavirinae	Gammacoronavirus	Igacovirus	Gammacoronavirus_Anatiscopes(NL3)	DuCoV_NL3	Gamma_NL3
In this study	PP845402	PP845505	28187	complete genome		2021-11-07	China	Shanghai	Shanghai	Cloacal swabs					Anseriformes	Anatidae	Anas	Anas crecca	yes	Coronaviridae	Orthocoronavirinae	Gammacoronavirus	Igacovirus	Gammacoronavirus_Anatiscopes(NL3)	DuCoV_NL3	Gamma_NL3
In this study	PP845386	PP845602	28661	complete genome		2020-11-19	China	Shanghai	Shanghai	Cloacal swabs					Anseriformes	Anatidae	Anas	Anas zonorhyncha	yes	Coronaviridae	Orthocoronavirinae	Gammacoronavirus	Igacovirus	Gammacoronavirus_Anatiscopes(NL3)	DuCoV_NL3	Gamma_NL3
In this study	PP845438	PP845522	29032	complete genome		2021-11-11	China	Shanghai	Shanghai	feces					Anseriformes	Anatidae	Anas	Anas platyrhynchos	yes	Coronaviridae	Orthocoronavirinae	Gammacoronavirus	Igacovirus	Gammacoronavirus_Anatiscopes(NL3)	DuCoV_NL3	Gamma_NL3
In this study	PP845442	PP845523	29099	complete genome		2021-11-11	China	Shanghai	Shanghai	feces					Anseriformes	Anatidae	Anas	Anas platyrhynchos	yes	Coronaviridae	Orthocoronavirinae	Gammacoronavirus	Igacovirus	Gammacoronavirus_Anatiscopes(NL3)	DuCoV_NL3	Gamma_NL3
In this study	PP845443	PP845546	28819	complete genome		2019-10-20	China	Shanghai	Shanghai	Cloacal swabs					Anseriformes	Anatidae	Anas	Anas zonorhyncha	yes	Coronaviridae	Orthocoronavirinae	Gammacoronavirus	Igacovirus	Gammacoronavirus_Anatiscopes(NL3)	DuCoV_NL3	Gamma_NL3
In this study	PP845447	PP845524	28930	complete genome		2022-11-15	China	Shanghai	Shanghai	Cloacal swabs					Anseriformes	Anatidae	Anas	Anas zonorhyncha	yes	Coronaviridae	Orthocoronavirinae	Gammacoronavirus	Igacovirus	Gammacoronavirus_Anatiscopes(NL3)	DuCoV_NL3	Gamma_NL3
In this study	PP845446	PP845560	28804	complete genome		2021-11-18	China	Shanghai	Shanghai	Cloacal swabs					Anseriformes	Anatidae	Anas	Anas acuta	yes	Coronaviridae	Orthocoronavirinae	Gammacoronavirus	Igacovirus	Gammacoronavirus_Anatiscopes(NL3)	DuCoV_NL3	Gamma_NL3
In this study	PP845441	PP845536	29120	complete genome		2020-12-02	China	Shanghai	Shanghai	Cloacal swabs					Anseriformes	Anatidae	Anas	Anas zonorhyncha	yes	Coronaviridae	Orthocoronavirinae	Gammacoronavirus	Igacovirus	Gammacoronavirus_Anatiscopes(NL3)	DuCoV_NL3	Gamma_NL3
In this study	PP845388	PP845537	28664	complete genome		2020-12-04	China	Shanghai	Shanghai	Cloacal swabs					Anseriformes	Anatidae	Mareca	Mareca strepera	yes	Coronaviridae	Orthocoronavirinae	Gammacoronavirus	Igacovirus	Gammacoronavirus_Anatiscopes(NL3)	DuCoV_NL3	Gamma_NL3
In this study	PP845435	PP845539	28438	complete genome		2021-11-28	China	Shanghai	Shanghai	Cloacal swabs					Anseriformes	Anatidae	Anas	Anas platyrhynchos	yes	Coronaviridae	Orthocoronavirinae	Gammacoronavirus	Igacovirus	Gammacoronavirus_Anatiscopes(NL3)	DuCoV_NL3	Gamma_NL3
In this study	PP845396	PP845542	28646	complete genome		2021-11-04	China	Shanghai	Shanghai	Cloacal swabs					Anseriformes	Anatidae	Anas	Anas acuta	yes	Coronaviridae	Orthocoronavirinae	Gammacoronavirus	Igacovirus	Gammacoronavirus_Anatiscopes(NL3)	DuCoV_NL3	Gamma_NL3
In this study	PP845397	PP845543	28644	complete genome		2021-11-18	China	Shanghai	Shanghai	Cloacal swabs					Anseriformes	Anatidae	Anas	Anas acuta	yes	Coronaviridae	Orthocoronavirinae	Gammacoronavirus	Igacovirus	Gammacoronavirus_Anatiscopes(NL3)	DuCoV_NL3	Gamma_NL3
In this study	PP845444	PP845545	28946	complete genome		2021-11-07	China	Shanghai	Shanghai	Cloacal swabs					Anseriformes	Anatidae	Anas	Anas crecca	yes	Coronaviridae	Orthocoronavirinae	Gammacoronavirus	Igacovirus	Gammacoronavirus_Anatiscopes(NL3)	DuCoV_NL3	Gamma_NL3
In this study	PP845445	PP845527	28937	complete genome		2022-11-24	China	Shanghai	Shanghai	Cloacal swabs					Anseriformes	Anatidae	Anas	Anas platyrhynchos	yes	Coronaviridae	Orthocoronavirinae	Gammacoronavirus	Igacovirus	Gammacoronavirus_Anatiscopes(NL3)	DuCoV_NL3	Gamma_NL3
In this study	PP845436	PP845558	29044	complete genome		2019-11-02	China	Shanghai	Shanghai	Cloacal swabs					Anseriformes	Anatidae	Anas	Anas zonorhyncha	yes	Coronaviridae	Orthocoronavirinae	Gammacoronavirus	Igacovirus	Gammacoronavirus_Anatiscopes(NL3)	DuCoV_NL3	Gamma_NL3
In this study	PP845430	PP845556	28465	complete genome		2020-11-19	China	Shanghai	Shanghai	Cloacal swabs					Anseriformes	Anatidae	Anas	Anas zonorhyncha	yes	Coronaviridae	Orthocoronavirinae	Gammacoronavirus	Igacovirus	Gammacoronavirus_Anatiscopes(NL3)	DuCoV_NL3	Gamma_NL3
In this study	PP845431	PP845557	28460	complete genome		2020-11-29	China	Shanghai	Shanghai	Cloacal swabs					Anseriformes	Anatidae	Anas	Anas platyrhynchos	yes	Coronaviridae	Orthocoronavirinae	Gammacoronavirus	Igacovirus	Gammacoronavirus_Anatiscopes(NL3)	DuCoV_NL3	Gamma_NL3
In this study	PP845429	PP845555	28460	complete genome		2020-11-04	China	Shanghai	Shanghai	Cloacal swabs					Anseriformes	Anatidae	Anas	Anas zonorhyncha	yes	Coronaviridae	Orthocoronavirinae	Gammacoronavirus	Igacovirus	Gammacoronavirus_Anatiscopes(NL3)	DuCoV_NL3	Gamma_NL3
In this study	PP845394	PP845531	28671	complete genome		2021-11-04	China	Shanghai	Shanghai	Cloacal swabs					Anseriformes	Anatidae	Anas	Anas zonorhyncha	yes	Coronaviridae	Orthocoronavirinae	Gammacoronavirus	Igacovirus	Gammacoronavirus_Anatiscopes(NL3)	DuCoV_NL3	Gamma_NL3
In this study	PP845395	PP845533	28671	complete genome		2021-11-04	China	Shanghai	Shanghai	Cloacal swabs					Anseriformes	Anatidae	Anas	Anas zonorhyncha	yes	Coronaviridae	Orthocoronavirinae	Gammacoronavirus	Igacovirus	Gammacoronavirus_Anatiscopes(NL3)	DuCoV_NL3	Gamma_NL3
In this study	PP845428	PP845525	28453	complete genome		2022-11-15	China	Shanghai	Shanghai	Cloacal swabs					Anseriformes	Anatidae	Anas	Anas zonorhyncha	yes	Coronaviridae	Orthocoronavirinae	Gammacoronavirus	Igacovirus	Gammacoronavirus_Anatiscopes(NL3)	DuCoV_NL3	Gamma_NL3
In this study	PP845426	PP845526	28440	complete genome		2022-11-22	China	Shanghai	Shanghai	Cloacal swabs					Anseriformes	Anatidae	Anas	Anas platyrhynchos	yes	Coronaviridae	Orthocoronavirinae	Gammacoronavirus	Igacovirus	Gammacoronavirus_Anatiscopes(NL3)	DuCoV_NL3	Gamma_NL3
In this study	PP845654		503	partial, RdRp		2020-11-02	China	Shanghai	Shanghai	Cloacal swabs					Anseriformes	Anatidae	Anas	Anas crecca	yes	Coronaviridae	Orthocoronavirinae	Gammacoronavirus	Igacovirus	Gammacoronavirus_Anatiscopes(NL3)	DuCoV_NL3	Gamma_NL3
In this study	PP845718		503	partial, RdRp		2020-11-02	China	Shanghai	Shanghai	Cloacal swabs					Anseriformes	Anatidae	Anas	Anas crecca	yes	Coronaviridae	Orthocoronavirinae	Gammacoronavirus	Igacovirus	Gammacoronavirus_Anatiscopes(NL3)	DuCoV_NL3	Gamma_NL3
In this study	PP845600		503	partial, RdRp		2020-11-19	China	Shanghai	Shanghai	Cloacal swabs					Anseriformes	Anatidae	Anas	Anas zonorhyncha	yes	Coronaviridae	Orthocoronavirinae	Gammacoronavirus	Igacovirus	Gammacoronavirus_Anatiscopes(NL3)	DuCoV_NL3	Gamma_NL3
In this study	PP845601		503	partial, RdRp		2020-11-19	China	Shanghai	Shanghai	Cloacal swabs					Anseriformes	Anatidae	Anas	Anas zonorhyncha	yes	Coronaviridae	Orthocoronavirinae	Gammacoronavirus	Igacovirus	Gammacoronavirus_Anatiscopes(NL3)	DuCoV_NL3	Gamma_NL3
In this study	PP845567		503	partial, RdRp		2020-12-02	China	Shanghai	Shanghai	Cloacal swabs					Anseriformes	Anatidae	Anas	Anas zonorhyncha	yes	Coronaviridae	Orthocoronavirinae	Gammacoronavirus	Igacovirus	Gammacoronavirus_Anatiscopes(NL3)	DuCoV_NL3	Gamma_NL3
In this study	PP845719		503	partial, RdRp		2021-09-02	China	Shanghai	Shanghai	Cloacal swabs					Charadriiformes	Scolopacidae	Tringa	Tringa totanus	yes	Coronaviridae	Orthocoronavirinae	Gammacoronavirus	Igacovirus	Gammacoronavirus_Anatiscopes(NL3)	DuCoV_NL3	Gamma_NL3
In this study	PP845506		503	partial, RdRp		2021-11-07	China	Shanghai	Shanghai	Cloacal swabs					Anseriformes	Anatidae	Anas	Anas crecca	yes	Coronaviridae	Orthocoronavirinae	Gammacoronavirus	Igacovirus	Gammacoronavirus_Anatiscopes(NL3)	DuCoV_NL3	Gamma_NL3
In this study	PP845528		503	partial, RdRp		2021-11-11	China	Shanghai	Shanghai	Cloacal swabs					Anseriformes	Anatidae	Anas	Anas crecca	yes	Coronaviridae	Orthocoronavirinae	Gammacoronavirus	Igacovirus	Gammacoronavirus_Anatiscopes(NL3)	DuCoV_NL3	Gamma_NL3
In this study	PP845796		500	partial, RdRp		2021-11-11	China	Shanghai	Shanghai	feces					Anseriformes	Anatidae	Anas	Anas platyrhynchos	yes	Coronaviridae	Orthocoronavirinae	Deltacoronavirus	Herdecovirus	Deltacoronavirus_nycticoracis	NHCoV_HKU19	Delta_HKU19
In this study	PP845576		503	partial, RdRp		2021-11-23	China	Shanghai	Shanghai	Cloacal swabs					Anseriformes	Anatidae	Anas	Anas clypeata		Coronaviridae	Orthocoronavirinae	Gammacoronavirus	Igacovirus	Gammacoronavirus_Anatiscopes(NL3)	DuCoV_NL3	Gamma_NL3
In this study	PP845798		500	partial, RdRp		2021-11-23	China	Shanghai	Shanghai	Cloacal swabs					Anseriformes	Anatidae	Anas	Anas clypeata		Coronaviridae	Orthocoronavirinae	Deltacoronavirus	Andecovirus	Deltacoronavirus_anatis(NL1)	DuCoV_NL1	Delta_NL1
In this study	PP845542		503	partial, RdRp		2021-11-04	China	Shanghai	Shanghai	Cloacal swabs					Anseriformes	Anatidae	Anas	Anas acuta	yes	Coronaviridae	Orthocoronavirinae	Gammacoronavirus	Igacovirus	Gammacoronavirus_Anatiscopes(NL3)	DuCoV_NL3	Gamma_NL3
In this study	PP845563		503	partial, RdRp		2021-11-04	China	Shanghai	Shanghai	Cloacal swabs					Anseriformes	Anatidae	Mareca	Mareca penelope	yes	Coronaviridae	Orthocoronavirinae	Gammacoronavirus	Igacovirus	Gammacoronavirus_Anatiscopes(NL3)	DuCoV_NL3	Gamma_NL3
In this study	PP845529		503	partial, RdRp		2021-11-04	China	Shanghai	Shanghai	Cloacal swabs					Anseriformes	Anatidae	Mareca	Mareca strepera	yes	Coronaviridae	Orthocoronavirinae	Gammacoronavirus	Igacovirus	Gammacoronavirus_Anatiscopes(NL3)	DuCoV_NL3	Gamma_NL3
In this study	PP845530		503	partial, RdRp		2021-11-04	China	Shanghai	Shanghai	Cloacal swabs					Anseriformes	Anatidae	Anas	Anas zonorhyncha	yes	Coronaviridae	Orthocoronavirinae	Gammacoronavirus	Igacovirus	Gammacoronavirus_Anatiscopes(NL3)	DuCoV_NL3	Gamma_NL3
In this study	PP845531		503	partial, RdRp		2021-11-04	China	Shanghai	Shanghai	Cloacal swabs					Anseriformes	Anatidae	Anas	Anas zonorhyncha	yes	Coronaviridae	Orthocoronavirinae	Gammacoronavirus	Igacovirus	Gammacoronavirus_Anatiscopes(NL3)	DuCoV_NL3	Gamma_NL3
In this study	PP845532		503	partial, RdRp		2021-11-04	China	Shanghai	Shanghai	Cloacal swabs					Anseriformes	Anatidae	Anas	Anas acuta	yes	Coronaviridae	Orthocoronavirinae	Gammacoronavirus	Igacovirus	Gammacoronavirus_Anatiscopes(NL3)	DuCoV_NL3	Gamma_NL3
In this study	PP845533		503	partial, RdRp		2021-11-04	China	Shanghai	Shanghai	Cloacal swabs					Anseriformes	Anatidae	Anas	Anas zonorhyncha	yes	Coronaviridae	Orthocoronavirinae	Gammacoronavirus	Igacovirus	Gammacoronavirus_Anatiscopes(NL3)	DuCoV_NL3	Gamma_NL3
In this study	PP845564		503	partial, RdRp		2021-11-04	China	Shanghai	Shanghai	Cloacal swabs					Anseriformes	Anatidae	Anas	Anas crecca	yes	Coronaviridae	Orthocoronavirinae	Gammacoronavirus	Igacovirus	Gammacoronavirus_Anatiscopes(NL3)	DuCoV_NL3	Gamma_NL3
In this study	PP845534		503	partial, RdRp		2021-11-04	China	Shanghai	Shanghai	Cloacal swabs					Anseriformes	Anatidae	Anas	Anas zonorhyncha	yes	Coronaviridae	Orthocoronavirinae	Gammacoronavirus	Igacovirus	Gammacoronavirus_Anatiscopes(NL3)	DuCoV_NL3	Gamma_NL3
In this study	PP845665		503	partial, RdRp		2021-11-04	China	Shanghai	Shanghai	Cloacal swabs					Anseriformes	Anatidae	Anas	Anas crecca	yes	Coronaviridae	Orthocoronavirinae	Gammacoronavirus	Igacovirus	Gammacoronavirus_Anatiscopes(NL3)	DuCoV_NL3	Gamma_NL3
In this study	PP845577		503	partial, RdRp		2021-12-10	China	Shanghai	Shanghai	Cloacal swabs					Anseriformes	Anatidae	Anas	Anas crecca	yes	Coronaviridae	Orthocoronavirinae	Gammacoronavirus	Igacovirus	Gammacoronavirus_Anatiscopes(NL3)	DuCoV_NL3	Gamma_NL3
In this study	PP845645		503	partial, RdRp		2021-11-04	China	Shanghai	Shanghai	Cloacal swabs					Anseriformes	Anatidae	Anas	Anas zonorhyncha	yes	Coronaviridae	Orthocoronavirinae	Gammacoronavirus	Igacovirus	Gammacoronavirus_Anatiscopes(NL3)	DuCoV_NL3	Gamma_NL3
In this study	PP845597		503	partial, RdRp		2021-11-04	China	Shanghai	Shanghai	Cloacal swabs					Anseriformes	Anatidae	Anas	Anas zonorhyncha	yes	Coronaviridae	Orthocoronavirinae	Gammacoronavirus	Igacovirus	Gammacoronavirus_Anatiscopes(NL3)	DuCoV_NL3	Gamma_NL3
In this study	PP845605		503	partial, RdRp		2021-11-04	China	Shanghai	Shanghai	Cloacal swabs					Anseriformes	Anatidae	Anas	Anas zonorhyncha	yes	Coronaviridae	Orthocoronavirinae	Gammacoronavirus	Igacovirus	Gammacoronavirus_Anatiscopes(NL3)	DuCoV_NL3	Gamma_NL3
In this study	PP845614		503	partial, RdRp		2021-11-04	China	Shanghai	Shanghai	Cloacal swabs					Anseriformes	Anatidae	Anas	Anas zonorhyncha	yes	Coronaviridae	Orthocoronavirinae	Gammacoronavirus	Igacovirus	Gammacoronavirus_Anatiscopes(NL3)	DuCoV_NL3	Gamma_NL3
In this study	PP845606		503	partial, RdRp		2021-11-04	China	Shanghai	Shanghai	Cloacal swabs					Anseriformes	Anatidae	Anas	Anas zonorhyncha	yes	Coronaviridae	Orthocoronavirinae	Gammacoronavirus	Igacovirus	Gammacoronavirus_Anatiscopes(NL3)	DuCoV_NL3	Gamma_NL3
In this study	PP845510		503	partial, RdRp		2021-11-07	China	Shanghai	Shanghai	Cloacal swabs					Anseriformes	Anatidae	Anas	Anas crecca	yes	Coronaviridae	Orthocoronavirinae	Gammacoronavirus	Igacovirus	Gammacoronavirus_Anatiscopes(NL3)	DuCoV_NL3	Gamma_NL3
In this study	PP845509		503	partial, RdRp		2021-11-07	China	Shanghai	Shanghai	Cloacal swabs					Anseriformes	Anatidae	Anas	Anas crecca	yes	Coronaviridae	Orthocoronavirinae	Gammacoronavirus	Igacovirus	Gammacoronavirus_Anatiscopes(NL3)	DuCoV_NL3	Gamma_NL3
In this study	PP845545		503	partial, RdRp		2021-11-07	China	Shanghai	Shanghai	Cloacal swabs					Anseriformes	Anatidae	Anas	Anas crecca	yes	Coronaviridae	Orthocoronavirinae	Gammacoronavirus	Igacovirus	Gammacoronavirus_Anatiscopes(NL3)	DuCoV_NL3	Gamma_NL3
In this study	PP845507		503	partial, RdRp		2021-11-07	China	Shanghai	Shanghai	Cloacal swabs					Anseriformes	Anatidae	Anas	Anas crecca	yes	Coronaviridae	Orthocoronavirinae	Gammacoronavirus	Igacovirus	Gammacoronavirus_Anatiscopes(NL3)	DuCoV_NL3	Gamma_NL3
In this study	PP845512		503	partial, RdRp		2021-11-07	China	Shanghai	Shanghai	Cloacal swabs					Anseriformes	Anatidae	Anas	Anas crecca	yes	Coronaviridae	Orthocoronavirinae	Gammacoronavirus	Igacovirus	Gammacoronavirus_Anatiscopes(NL3)	DuCoV_NL3	Gamma_NL3
In this study	PP845513		503	partial, RdRp		2021-11-07	China	Shanghai	Shanghai	Cloacal swabs					Anseriformes	Anatidae	Anas	Anas crecca	yes	Coronaviridae	Orthocoronavirinae	Gammacoronavirus	Igacovirus	Gammacoronavirus_Anatiscopes(NL3)	DuCoV_NL3	Gamma_NL3
In this study	PP845786		500	partial, RdRp		2021-07-30	China	Shanghai	Shanghai	tissue					Pelecaniformes	Ardeidae	Egretta	Egretta garzetta	yes	Coronaviridae	Orthocoronavirinae	Deltacoronavirus	Herdecovirus	Deltacoronavirus_nycticoracis	NHCoV_HKU19	Delta_HKU19
In this study	PP845580		503	partial, RdRp		2021-07-30	China	Shanghai	Shanghai	tissue					Pelecaniformes	Ardeidae	Egretta	Egretta garzetta	yes	Coronaviridae	Orthocoronavirinae	Gammacoronavirus	Igacovirus	Gammacoronavirus_Anatiscopes(NL3)	DuCoV_NL3	Gamma_NL3
In this study	PP845623		503	partial, RdRp		2021-11-07	China	Shanghai	Shanghai	Cloacal swabs					Anseriformes	Anatidae	Anas	Anas crecca	yes	Coronaviridae	Orthocoronavirinae	Gammacoronavirus	Igacovirus	Gammacoronavirus_Anatiscopes(NL3)	DuCoV_NL3	Gamma_NL3
In this study	PP845508		503	partial, RdRp		2021-11-07	China	Shanghai	Shanghai	Cloacal swabs					Anseriformes	Anatidae	Anas	Anas crecca	yes	Coronaviridae	Orthocoronavirinae	Gammacoronavirus	Igacovirus	Gammacoronavirus_Anatiscopes(NL3)	DuCoV_NL3	Gamma_NL3
In this study	PP845511		503	partial, RdRp		2021-11-07	China	Shanghai	Shanghai	Cloacal swabs					Anseriformes	Anatidae	Aythya	Aythya ferina	yes	Coronaviridae	Orthocoronavirinae	Gammacoronavirus	Igacovirus	Gammacoronavirus_Anatiscopes(NL3)	DuCoV_NL3	Gamma_NL3
In this study	PP845678		503	partial, RdRp		2021-11-07	China	Shanghai	Shanghai	Cloacal swabs					Anseriformes	Anatidae	Aythya	Aythya ferina	yes	Coronaviridae	Orthocoronavirinae	Gammacoronavirus	Igacovirus	Gammacoronavirus_Anatiscopes(NL3)	DuCoV_NL3	Gamma_NL3
In this study	PP845607		503	partial, RdRp		2021-11-07	China	Shanghai	Shanghai	Cloacal swabs					Anseriformes	Anatidae	Mareca	Mareca penelope	yes	Coronaviridae	Orthocoronavirinae	Gammacoronavirus	Igacovirus	Gammacoronavirus_Anatiscopes(NL3)	DuCoV_NL3	Gamma_NL3
In this study	PP845515		503	partial, RdRp		2021-11-07	China	Shanghai	Shanghai	Cloacal swabs					Anseriformes	Anatidae	Anas	Anas crecca	yes	Coronaviridae	Orthocoronavirinae	Gammacoronavirus	Igacovirus	Gammacoronavirus_Anatiscopes(NL3)	DuCoV_NL3	Gamma_NL3
In this study	PP845668		503	partial, RdRp		2021-11-11	China	Shanghai	Shanghai	Cloacal swabs					Anseriformes	Anatidae	Anas	Anas crecca	yes	Coronaviridae	Orthocoronavirinae	Gammacoronavirus	Igacovirus	Gammacoronavirus_Anatiscopes(NL3)	DuCoV_NL3	Gamma_NL3
In this study	PP845666		503	partial, RdRp		2021-11-11	China	Shanghai	Shanghai	Cloacal swabs					Anseriformes	Anatidae	Anas	Anas crecca	yes	Coronaviridae	Orthocoronavirinae	Gammacoronavirus	Igacovirus	Gammacoronavirus_Anatiscopes(NL3)	DuCoV_NL3	Gamma_NL3
In this study	PP845520		503	partial, RdRp		2021-11-11	China	Shanghai	Shanghai	Cloacal swabs					Anseriformes	Anatidae	Anas	Anas platyrhynchos	yes	Coronaviridae	Orthocoronavirinae	Gammacoronavirus	Igacovirus	Gammacoronavirus_Anatiscopes(NL3)	DuCoV_NL3	Gamma_NL3
In this study	PP845593		503	partial, RdRp		2021-11-11	China	Shanghai	Shanghai	Cloacal swabs					Anseriformes	Anatidae	Mareca	Mareca penelope	yes	Coronaviridae	Orthocoronavirinae	Gammacoronavirus	Igacovirus	Gammacoronavirus_Anatiscopes(NL3)	DuCoV_NL3	Gamma_NL3
In this study	PP845784		500	partial, RdRp		2021-07-30	China	Shanghai	Shanghai	tissue					Pelecaniformes	Ardeidae	Egretta	Egretta garzetta	yes	Coronaviridae	Orthocoronavirinae	Deltacoronavirus	Herdecovirus	Deltacoronavirus_nycticoracis	NHCoV_HKU19	Delta_HKU19
In this study	PP845608		503	partial, RdRp		2021-11-11	China	Shanghai	Shanghai	Cloacal swabs					Anseriformes	Anatidae	Anas	Anas crecca	yes	Coronaviridae	Orthocoronavirinae	Gammacoronavirus	Igacovirus	Gammacoronavirus_Anatiscopes(NL3)	DuCoV_NL3	Gamma_NL3
In this study	PP845599		503	partial, RdRp		2021-11-11	China	Shanghai	Shanghai	Cloacal swabs					Anseriformes	Anatidae	Anas	Anas crecca	yes	Coronaviridae	Orthocoronavirinae	Gammacoronavirus	Igacovirus	Gammacoronavirus_Anatiscopes(NL3)	DuCoV_NL3	Gamma_NL3
In this study	PP845561		503	partial, RdRp		2021-11-11	China	Shanghai	Shanghai	Cloacal swabs					Anseriformes	Anatidae	Anas	Anas crecca	yes	Coronaviridae	Orthocoronavirinae	Gammacoronavirus	Igacovirus	Gammacoronavirus_Anatiscopes(NL3)	DuCoV_NL3	Gamma_NL3
In this study	PP845699		503	partial, RdRp		2021-11-11	China	Shanghai	Shanghai	Cloacal swabs					Anseriformes	Anatidae	Anas	Anas crecca	yes	Coronaviridae	Orthocoronavirinae	Gammacoronavirus	Igacovirus	Gammacoronavirus_Anatiscopes(NL3)	DuCoV_NL3	Gamma_NL3
In this study	PP845505		503	partial, RdRp		2021-11-07	China	Shanghai	Shanghai	Cloacal swabs					Anseriformes	Anatidae	Anas	Anas crecca	yes	Coronaviridae	Orthocoronavirinae	Gammacoronavirus	Igacovirus	Gammacoronavirus_Anatiscopes(NL3)	DuCoV_NL3	Gamma_NL3
In this study	PP845617		503	partial, RdRp		2021-11-11	China	Shanghai	Shanghai	Cloacal swabs					Anseriformes	Anatidae	Anas	Anas crecca	yes	Coronaviridae	Orthocoronavirinae	Gammacoronavirus	Igacovirus	Gammacoronavirus_Anatiscopes(NL3)	DuCoV_NL3	Gamma_NL3
In this study	PP845700		503	partial, RdRp		2021-11-11	China	Shanghai	Shanghai	Cloacal swabs					Anseriformes	Anatidae	Anas	Anas crecca	yes	Coronaviridae	Orthocoronavirinae	Gammacoronavirus	Igacovirus	Gammacoronavirus_Anatiscopes(NL3)	DuCoV_NL3	Gamma_NL3
In this study	PP845589		503	partial, RdRp		2021-11-11	China	Shanghai	Shanghai	Cloacal swabs					Anseriformes	Anatidae	Anas	Anas crecca	yes	Coronaviridae	Orthocoronavirinae	Gammacoronavirus	Igacovirus	Gammacoronavirus_Anatiscopes(NL3)	DuCoV_NL3	Gamma_NL3
In this study	PP845669		503	partial, RdRp		2021-11-11	China	Shanghai	Shanghai	Cloacal swabs					Anseriformes	Anatidae	Anas	Anas crecca	yes	Coronaviridae	Orthocoronavirinae	Gammacoronavirus	Igacovirus	Gammacoronavirus_Anatiscopes(NL3)	DuCoV_NL3	Gamma_NL3
In this study	PP845615		503	partial, RdRp		2021-11-11	China	Shanghai	Shanghai	Cloacal swabs					Anseriformes	Anatidae	Anas	Anas crecca	yes	Coronaviridae	Orthocoronavirinae	Gammacoronavirus	Igacovirus	Gammacoronavirus_Anatiscopes(NL3)	DuCoV_NL3	Gamma_NL3
In this study	PP845613		503	partial, RdRp		2021-11-11	China	Shanghai	Shanghai	Cloacal swabs					Anseriformes	Anatidae	Anas	Anas crecca	yes	Coronaviridae	Orthocoronavirinae	Gammacoronavirus	Igacovirus	Gammacoronavirus_Anatiscopes(NL3)	DuCoV_NL3	Gamma_NL3
In this study	PP845663		503	partial, RdRp		2021-11-11	China	Shanghai	Shanghai	Cloacal swabs					Anseriformes	Anatidae	Anas	Anas crecca	yes	Coronaviridae	Orthocoronavirinae	Gammacoronavirus	Igacovirus	Gammacoronavirus_Anatiscopes(NL3)	DuCoV_NL3	Gamma_NL3
In this study	PP845682		503	partial, RdRp		2019-11-10	China	Shanghai	Shanghai	Cloacal swabs					Anseriformes	Anatidae	Anas	Anas platyrhynchos	yes	Coronaviridae	Orthocoronavirinae	Gammacoronavirus	Igacovirus	Gammacoronavirus_Anatiscopes(NL3)	DuCoV_NL3	Gamma_NL3
In this study	PP845681		503	partial, RdRp		2021-11-14	China	Shanghai	Shanghai	Cloacal swabs					Anseriformes	Anatidae	Mareca	Mareca penelope	yes	Coronaviridae	Orthocoronavirinae	Gammacoronavirus	Igacovirus	Gammacoronavirus_Anatiscopes(NL3)	DuCoV_NL3	Gamma_NL3
In this study	PP845802		500	partial, RdRp		2021-11-14	China	Shanghai	Shanghai	Cloacal swabs					Anseriformes	Anatidae	Anas	Anas crecca	yes	Coronaviridae	Orthocoronavirinae	Deltacoronavirus	Andecovirus	Deltacoronavirus_anatis(NL1)	DuCoV_NL1	Delta_NL1
In this study	PP845609		503	partial, RdRp		2021-11-16	China	Shanghai	Shanghai	Cloacal swabs					Anseriformes	Anatidae	Anas	Anas platyrhynchos	yes	Coronaviridae	Orthocoronavirinae	Gammacoronavirus	Igacovirus	Gammacoronavirus_Anatiscopes(NL3)	DuCoV_NL3	Gamma_NL3
In this study	PP845679		503	partial, RdRp		2021-11-18	China	Shanghai	Shanghai	Cloacal swabs					Anseriformes	Anatidae	Anas	Anas zonorhyncha	yes	Coronaviridae	Orthocoronavirinae	Gammacoronavirus	Igacovirus	Gammacoronavirus_Anatiscopes(NL3)	DuCoV_NL3	Gamma_NL3
In this study	PP845680		503	partial, RdRp		2021-11-18	China	Shanghai	Shanghai	Cloacal swabs					Anseriformes	Anatidae	Anas	Anas zonorhyncha	yes	Coronaviridae	Orthocoronavirinae	Gammacoronavirus	Igacovirus	Gammacoronavirus_Anatiscopes(NL3)	DuCoV_NL3	Gamma_NL3
In this study	PP845560		503	partial, RdRp		2021-11-18	China	Shanghai	Shanghai	Cloacal swabs					Anseriformes	Anatidae	Anas	Anas acuta	yes	Coronaviridae	Orthocoronavirinae	Gammacoronavirus	Igacovirus	Gammacoronavirus_Anatiscopes(NL3)	DuCoV_NL3	Gamma_NL3
In this study	PP845543		503	partial, RdRp		2021-11-18	China	Shanghai	Shanghai	Cloacal swabs					Anseriformes	Anatidae	Anas	Anas acuta	yes	Coronaviridae	Orthocoronavirinae	Gammacoronavirus	Igacovirus	Gammacoronavirus_Anatiscopes(NL3)	DuCoV_NL3	Gamma_NL3
In this study	PP845618		503	partial, RdRp		2021-11-18	China	Shanghai	Shanghai	Cloacal swabs					Anseriformes	Anatidae	Mareca	Mareca falcata	yes	Coronaviridae	Orthocoronavirinae	Gammacoronavirus	Igacovirus	Gammacoronavirus_Anatiscopes(NL3)	DuCoV_NL3	Gamma_NL3
In this study	PP845616		503	partial, RdRp		2021-11-18	China	Shanghai	Shanghai	Cloacal swabs					Anseriformes	Anatidae	Anas	Anas acuta	yes	Coronaviridae	Orthocoronavirinae	Gammacoronavirus	Igacovirus	Gammacoronavirus_Anatiscopes(NL3)	DuCoV_NL3	Gamma_NL3
In this study	PP845579		503	partial, RdRp		2021-11-18	China	Shanghai	Shanghai	Cloacal swabs					Anseriformes	Anatidae	Mareca	Mareca penelope	yes	Coronaviridae	Orthocoronavirinae	Gammacoronavirus	Igacovirus	Gammacoronavirus_Anatiscopes(NL3)	DuCoV_NL3	Gamma_NL3
In this study	PP845544		503	partial, RdRp		2021-11-18	China	Shanghai	Shanghai	Cloacal swabs					Anseriformes	Anatidae	Mareca	Mareca penelope	yes	Coronaviridae	Orthocoronavirinae	Gammacoronavirus	Igacovirus	Gammacoronavirus_Anatiscopes(NL3)	DuCoV_NL3	Gamma_NL3
In this study	PP845660		503	partial, RdRp		2019-11-11	China	Shanghai	Shanghai	Cloacal swabs					Anseriformes	Anatidae	Anas	Anas crecca	yes	Coronaviridae	Orthocoronavirinae	Gammacoronavirus	Igacovirus	Gammacoronavirus_Anatiscopes(NL3)	DuCoV_NL3	Gamma_NL3
In this study	PP845799		500	partial, RdRp		2021-11-23	China	Shanghai	Shanghai	Cloacal swabs					Anseriformes	Anatidae	Mareca	Mareca strepera	yes	Coronaviridae	Orthocoronavirinae	Deltacoronavirus	Andecovirus	Deltacoronavirus_anatis(NL1)	DuCoV_NL1	Delta_NL1
In this study	PP845688		503	partial, RdRp		2021-11-23	China	Shanghai	Shanghai	Cloacal swabs					Anseriformes	Anatidae	Anas	Anas zonorhyncha	yes	Coronaviridae	Orthocoronavirinae	Gammacoronavirus	Igacovirus	Gammacoronavirus_Anatiscopes(NL3)	DuCoV_NL3	Gamma_NL3
In this study	PP845590		503	partial, RdRp		2021-11-23	China	Shanghai	Shanghai	Cloacal swabs					Anseriformes	Anatidae	Anas	Anas platyrhynchos	yes	Coronaviridae	Orthocoronavirinae	Gammacoronavirus	Igacovirus	Gammacoronavirus_Anatiscopes(NL3)	DuCoV_NL3	Gamma_NL3
In this study	PP845701		503	partial, RdRp		2021-11-23	China	Shanghai	Shanghai	Cloacal swabs					Anseriformes	Anatidae	Anas	Anas platyrhynchos	yes	Coronaviridae	Orthocoronavirinae	Gammacoronavirus	Igacovirus	Gammacoronavirus_Anatiscopes(NL3)	DuCoV_NL3	Gamma_NL3
In this study	PP845813		500	partial, RdRp		2021-11-23	China	Shanghai	Shanghai	Cloacal swabs					Anseriformes	Anatidae	Anas	Anas clypeata		Coronaviridae	Orthocoronavirinae	Deltacoronavirus	Andecovirus	Deltacoronavirus_marecae	WiCoV_HKU20	Delta_HKU20
In this study	PP845814		500	partial, RdRp		2021-11-23	China	Shanghai	Shanghai	Cloacal swabs					Anseriformes	Anatidae	Aythya	Aythya ferina	yes	Coronaviridae	Orthocoronavirinae	Deltacoronavirus	Andecovirus	Deltacoronavirus_marecae	WiCoV_HKU20	Delta_HKU20
In this study	PP845815		500	partial, RdRp		2021-11-23	China	Shanghai	Shanghai	Cloacal swabs					Anseriformes	Anatidae	Mareca	Mareca strepera	yes	Coronaviridae	Orthocoronavirinae	Deltacoronavirus	Andecovirus	Deltacoronavirus_marecae	WiCoV_HKU20	Delta_HKU20
In this study	PP845800		500	partial, RdRp		2021-11-23	China	Shanghai	Shanghai	Cloacal swabs					Anseriformes	Anatidae	Anas	Anas clypeata		Coronaviridae	Orthocoronavirinae	Deltacoronavirus	Andecovirus	Deltacoronavirus_anatis(NL1)	DuCoV_NL1	Delta_NL1
In this study	PP845723		503	partial, RdRp		2021-11-23	China	Shanghai	Shanghai	Cloacal swabs					Anseriformes	Anatidae	Anas	Anas crecca	yes	Coronaviridae	Orthocoronavirinae	Gammacoronavirus	Igacovirus	Gammacoronavirus_Anatiscopes(NL3)	DuCoV_NL3	Gamma_NL3
In this study	PP845816		500	partial, RdRp		2021-11-23	China	Shanghai	Shanghai	Cloacal swabs					Anseriformes	Anatidae	Mareca	Mareca penelope	yes	Coronaviridae	Orthocoronavirinae	Deltacoronavirus	Andecovirus	Deltacoronavirus_marecae	WiCoV_HKU20	Delta_HKU20
In this study	PP845817		500	partial, RdRp		2021-11-23	China	Shanghai	Shanghai	Cloacal swabs					Anseriformes	Anatidae	Mareca	Mareca penelope	yes	Coronaviridae	Orthocoronavirinae	Deltacoronavirus	Andecovirus	Deltacoronavirus_marecae	WiCoV_HKU20	Delta_HKU20
In this study	PP845683		503	partial, RdRp		2019-11-11	China	Shanghai	Shanghai	Cloacal swabs					Anseriformes	Anatidae	Anas	Anas platyrhynchos	yes	Coronaviridae	Orthocoronavirinae	Gammacoronavirus	Igacovirus	Gammacoronavirus_Anatiscopes(NL3)	DuCoV_NL3	Gamma_NL3
In this study	PP845541		503	partial, RdRp		2021-11-23	China	Shanghai	Shanghai	Cloacal swabs					Anseriformes	Anatidae	Anas	Anas crecca	yes	Coronaviridae	Orthocoronavirinae	Gammacoronavirus	Igacovirus	Gammacoronavirus_Anatiscopes(NL3)	DuCoV_NL3	Gamma_NL3
In this study	PP845689		503	partial, RdRp		2021-11-23	China	Shanghai	Shanghai	Cloacal swabs					Anseriformes	Anatidae	Mareca	Mareca penelope	yes	Coronaviridae	Orthocoronavirinae	Gammacoronavirus	Igacovirus	Gammacoronavirus_Anatiscopes(NL3)	DuCoV_NL3	Gamma_NL3
In this study	PP845539		503	partial, RdRp		2021-11-28	China	Shanghai	Shanghai	Cloacal swabs					Anseriformes	Anatidae	Anas	Anas platyrhynchos	yes	Coronaviridae	Orthocoronavirinae	Gammacoronavirus	Igacovirus	Gammacoronavirus_Anatiscopes(NL3)	DuCoV_NL3	Gamma_NL3
In this study	PP845540		503	partial, RdRp		2021-11-28	China	Shanghai	Shanghai	Cloacal swabs					Anseriformes	Anatidae	Anas	Anas zonorhyncha	yes	Coronaviridae	Orthocoronavirinae	Gammacoronavirus	Igacovirus	Gammacoronavirus_Anatiscopes(NL3)	DuCoV_NL3	Gamma_NL3
In this study	PP845565		503	partial, RdRp		2021-11-28	China	Shanghai	Shanghai	Cloacal swabs					Anseriformes	Anatidae	Mareca	Mareca falcata	yes	Coronaviridae	Orthocoronavirinae	Gammacoronavirus	Igacovirus	Gammacoronavirus_Anatiscopes(NL3)	DuCoV_NL3	Gamma_NL3
In this study	PP845566		503	partial, RdRp		2021-11-28	China	Shanghai	Shanghai	Cloacal swabs					Anseriformes	Anatidae	Mareca	Mareca penelope	yes	Coronaviridae	Orthocoronavirinae	Gammacoronavirus	Igacovirus	Gammacoronavirus_Anatiscopes(NL3)	DuCoV_NL3	Gamma_NL3
In this study	PP845604		503	partial, RdRp		2021-11-28	China	Shanghai	Shanghai	Cloacal swabs					Anseriformes	Anatidae	Aix	Aix galericulata	yes	Coronaviridae	Orthocoronavirinae	Gammacoronavirus	Igacovirus	Gammacoronavirus_Anatiscopes(NL3)	DuCoV_NL3	Gamma_NL3
In this study	PP845641		503	partial, RdRp		2021-11-28	China	Shanghai	Shanghai	Cloacal swabs					Anseriformes	Anatidae	Aix	Aix galericulata	yes	Coronaviridae	Orthocoronavirinae	Gammacoronavirus	Igacovirus	Gammacoronavirus_Anatiscopes(NL3)	DuCoV_NL3	Gamma_NL3
In this study	PP845624		503	partial, RdRp		2021-11-28	China	Shanghai	Shanghai	Cloacal swabs					Anseriformes	Anatidae	Anas	Anas crecca	yes	Coronaviridae	Orthocoronavirinae	Gammacoronavirus	Igacovirus	Gammacoronavirus_Anatiscopes(NL3)	DuCoV_NL3	Gamma_NL3
In this study	PP845619		503	partial, RdRp		2021-11-28	China	Shanghai	Shanghai	Cloacal swabs					Anseriformes	Anatidae	Anas	Anas crecca	yes	Coronaviridae	Orthocoronavirinae	Gammacoronavirus	Igacovirus	Gammacoronavirus_Anatiscopes(NL3)	DuCoV_NL3	Gamma_NL3
In this study	PP845551		503	partial, RdRp		2019-11-16	China	Shanghai	Shanghai	Cloacal swabs					Anseriformes	Anatidae	Anas	Anas zonorhyncha	yes	Coronaviridae	Orthocoronavirinae	Gammacoronavirus	Igacovirus	Gammacoronavirus_Anatiscopes(NL3)	DuCoV_NL3	Gamma_NL3
In this study	PP845625		503	partial, RdRp		2021-11-28	China	Shanghai	Shanghai	Cloacal swabs					Anseriformes	Anatidae	Anas	Anas crecca	yes	Coronaviridae	Orthocoronavirinae	Gammacoronavirus	Igacovirus	Gammacoronavirus_Anatiscopes(NL3)	DuCoV_NL3	Gamma_NL3
In this study	PP845635		503	partial, RdRp		2021-11-28	China	Shanghai	Shanghai	Cloacal swabs					Anseriformes	Anatidae	Anas	Anas crecca	yes	Coronaviridae	Orthocoronavirinae	Gammacoronavirus	Igacovirus	Gammacoronavirus_Anatiscopes(NL3)	DuCoV_NL3	Gamma_NL3
In this study	PP845664		503	partial, RdRp		2021-11-28	China	Shanghai	Shanghai	Cloacal swabs					Anseriformes	Anatidae	Anas	Anas crecca	yes	Coronaviridae	Orthocoronavirinae	Gammacoronavirus	Igacovirus	Gammacoronavirus_Anatiscopes(NL3)	DuCoV_NL3	Gamma_NL3
In this study	PP845638		503	partial, RdRp		2021-12-03	China	Shanghai	Shanghai	Cloacal swabs					Anseriformes	Anatidae	Anas	Anas crecca	yes	Coronaviridae	Orthocoronavirinae	Gammacoronavirus	Igacovirus	Gammacoronavirus_Anatiscopes(NL3)	DuCoV_NL3	Gamma_NL3
In this study	PP845801		500	partial, RdRp		2021-12-03	China	Shanghai	Shanghai	Cloacal swabs					Anseriformes	Anatidae	Anas	Anas crecca	yes	Coronaviridae	Orthocoronavirinae	Deltacoronavirus	Andecovirus	Deltacoronavirus_anatis(NL1)	DuCoV_NL1	Delta_NL1
In this study	PP845621		503	partial, RdRp		2021-12-03	China	Shanghai	Shanghai	Cloacal swabs					Anseriformes	Anatidae	Anas	Anas crecca	yes	Coronaviridae	Orthocoronavirinae	Gammacoronavirus	Igacovirus	Gammacoronavirus_Anatiscopes(NL3)	DuCoV_NL3	Gamma_NL3
In this study	PP845640		503	partial, RdRp		2021-12-03	China	Shanghai	Shanghai	Cloacal swabs					Anseriformes	Anatidae	Mareca	Mareca strepera	yes	Coronaviridae	Orthocoronavirinae	Gammacoronavirus	Igacovirus	Gammacoronavirus_Anatiscopes(NL3)	DuCoV_NL3	Gamma_NL3
In this study	PP845818		500	partial, RdRp		2021-12-03	China	Shanghai	Shanghai	Cloacal swabs					Anseriformes	Anatidae	Anas	Anas clypeata		Coronaviridae	Orthocoronavirinae	Deltacoronavirus	Andecovirus	Deltacoronavirus_marecae	WiCoV_HKU20	Delta_HKU20
In this study	PP845803		500	partial, RdRp		2021-12-10	China	Shanghai	Shanghai	Cloacal swabs					Anseriformes	Anatidae	Anas	Anas crecca	yes	Coronaviridae	Orthocoronavirinae	Deltacoronavirus	Andecovirus	Deltacoronavirus_anatis(NL1)	DuCoV_NL1	Delta_NL1
In this study	PP845804		500	partial, RdRp		2021-12-10	China	Shanghai	Shanghai	Cloacal swabs					Anseriformes	Anatidae	Anas	Anas crecca	yes	Coronaviridae	Orthocoronavirinae	Deltacoronavirus	Andecovirus	Deltacoronavirus_anatis(NL1)	DuCoV_NL1	Delta_NL1
In this study	PP845546		503	partial, RdRp		2019-10-20	China	Shanghai	Shanghai	Cloacal swabs					Anseriformes	Anatidae	Anas	Anas zonorhyncha	yes	Coronaviridae	Orthocoronavirinae	Gammacoronavirus	Igacovirus	Gammacoronavirus_Anatiscopes(NL3)	DuCoV_NL3	Gamma_NL3
In this study	NA		503	partial, RdRp		2019-10-20	China	Shanghai	Shanghai	Cloacal swabs					Anseriformes	Anatidae	Anas	Anas zonorhyncha	yes	Coronaviridae	Orthocoronavirinae	Gammacoronavirus	Igacovirus	Gammacoronavirus_Anatiscopes(NL3)	DuCoV_NL3	Gamma_NL3
In this study	PP845805		500	partial, RdRp		2021-12-10	China	Shanghai	Shanghai	Cloacal swabs					Anseriformes	Anatidae	Anas	Anas crecca	yes	Coronaviridae	Orthocoronavirinae	Deltacoronavirus	Andecovirus	Deltacoronavirus_anatis(NL1)	DuCoV_NL1	Delta_NL1
In this study	PP845594		503	partial, RdRp		2021-12-10	China	Shanghai	Shanghai	Cloacal swabs					Anseriformes	Anatidae	Anas	Anas crecca	yes	Coronaviridae	Orthocoronavirinae	Gammacoronavirus	Igacovirus	Gammacoronavirus_Anatiscopes(NL3)	DuCoV_NL3	Gamma_NL3
In this study	PP845806		500	partial, RdRp		2021-12-10	China	Shanghai	Shanghai	Cloacal swabs					Anseriformes	Anatidae	Anas	Anas crecca	yes	Coronaviridae	Orthocoronavirinae	Deltacoronavirus	Andecovirus	Deltacoronavirus_anatis(NL1)	DuCoV_NL1	Delta_NL1
In this study	PP845591		503	partial, RdRp		2021-12-10	China	Shanghai	Shanghai	Cloacal swabs					Anseriformes	Anatidae	Anas	Anas crecca	yes	Coronaviridae	Orthocoronavirinae	Gammacoronavirus	Igacovirus	Gammacoronavirus_Anatiscopes(NL3)	DuCoV_NL3	Gamma_NL3
In this study	PP845750		503	partial, RdRp		2021-12-10	China	Shanghai	Shanghai	Cloacal swabs					Anseriformes	Anatidae	Anas	Anas crecca	yes	Coronaviridae	Orthocoronavirinae	Gammacoronavirus	Igacovirus	Gammacoronavirus_Anatiscopes(NL3)	DuCoV_NL3	Gamma_NL3
In this study	PP845807		500	partial, RdRp		2021-12-10	China	Shanghai	Shanghai	Cloacal swabs					Anseriformes	Anatidae	Anas	Anas crecca	yes	Coronaviridae	Orthocoronavirinae	Deltacoronavirus	Andecovirus	Deltacoronavirus_anatis(NL1)	DuCoV_NL1	Delta_NL1
In this study	PP845808		500	partial, RdRp		2021-12-10	China	Shanghai	Shanghai	Cloacal swabs					Anseriformes	Anatidae	Anas	Anas crecca	yes	Coronaviridae	Orthocoronavirinae	Deltacoronavirus	Andecovirus	Deltacoronavirus_anatis(NL1)	DuCoV_NL1	Delta_NL1
In this study	PP845809		500	partial, RdRp		2021-12-10	China	Shanghai	Shanghai	Cloacal swabs					Anseriformes	Anatidae	Anas	Anas crecca	yes	Coronaviridae	Orthocoronavirinae	Deltacoronavirus	Andecovirus	Deltacoronavirus_anatis(NL1)	DuCoV_NL1	Delta_NL1
In this study	PP845810		500	partial, RdRp		2021-12-10	China	Shanghai	Shanghai	Cloacal swabs					Anseriformes	Anatidae	Anas	Anas crecca	yes	Coronaviridae	Orthocoronavirinae	Deltacoronavirus	Andecovirus	Deltacoronavirus_anatis(NL1)	DuCoV_NL1	Delta_NL1
In this study	PP845811		500	partial, RdRp		2021-12-10	China	Shanghai	Shanghai	Cloacal swabs					Anseriformes	Anatidae	Anas	Anas crecca	yes	Coronaviridae	Orthocoronavirinae	Deltacoronavirus	Andecovirus	Deltacoronavirus_anatis(NL1)	DuCoV_NL1	Delta_NL1
In this study	PP845702		503	partial, RdRp		2021-12-05	China	Shanghai	Shanghai	Cloacal swabs					Anseriformes	Anatidae	Anas	Anas platyrhynchos	yes	Coronaviridae	Orthocoronavirinae	Gammacoronavirus	Igacovirus	Gammacoronavirus_Anatiscopes(NL3)	DuCoV_NL3	Gamma_NL3
In this study	PP845752		503	partial, RdRp		2021-12-06	China	Shanghai	Shanghai	Cloacal swabs					Anseriformes	Anatidae	Anas	Anser fabalis	yes	Coronaviridae	Orthocoronavirinae	Gammacoronavirus	Brangacovirus	Gammacoronavirus_brantae	BcanCoV_CB17	Gamma_CB17
In this study	PP845684		503	partial, RdRp		2019-10-29	China	Shanghai	Shanghai	Cloacal swabs					Anseriformes	Anatidae	Mareca	Mareca penelope	yes	Coronaviridae	Orthocoronavirinae	Gammacoronavirus	Igacovirus	Gammacoronavirus_Anatiscopes(NL3)	DuCoV_NL3	Gamma_NL3
In this study	PP845812		500	partial, RdRp		2021-12-10	China	Shanghai	Shanghai	Cloacal swabs					Anseriformes	Anatidae	Anas	Anas crecca	yes	Coronaviridae	Orthocoronavirinae	Deltacoronavirus	Andecovirus	Deltacoronavirus_anatis(NL1)	DuCoV_NL1	Delta_NL1
In this study	PP845610		503	partial, RdRp		2021-12-13	China	Shanghai	Shanghai	Cloacal swabs					Anseriformes	Anatidae	Aythya	Aythya ferina	yes	Coronaviridae	Orthocoronavirinae	Gammacoronavirus	Igacovirus	Gammacoronavirus_Anatiscopes(NL3)	DuCoV_NL3	Gamma_NL3
In this study	PP845620		503	partial, RdRp		2021-12-15	China	Shanghai	Shanghai	Cloacal swabs					Anseriformes	Anatidae	Anas	Anas platyrhynchos	yes	Coronaviridae	Orthocoronavirinae	Gammacoronavirus	Igacovirus	Gammacoronavirus_Anatiscopes(NL3)	DuCoV_NL3	Gamma_NL3
In this study	PP845783		500	partial, RdRp		2021-04-27	China	Shanghai	Shanghai	feces					Anseriformes	Anatidae	Anas	Anas crecca	yes	Coronaviridae	Orthocoronavirinae	Deltacoronavirus	Buldecovirus	Deltacoronavirus_suis	PoCoV_HKU15	Delta_HKU15
In this study	PP845595		503	partial, RdRp		2021-04-27	China	Shanghai	Shanghai	feces					Anseriformes	Anatidae	Anas	Anas poecilorhyncha	yes	Coronaviridae	Orthocoronavirinae	Gammacoronavirus	Igacovirus	Gammacoronavirus_Anatiscopes(NL3)	DuCoV_NL3	Gamma_NL3
In this study	NA		500	partial, RdRp		2021-04-27	China	Shanghai	Shanghai	feces					Anseriformes	Anatidae	Anas	Anas poecilorhyncha	yes	Coronaviridae	Orthocoronavirinae	Deltacoronavirus	Buldecovirus	Deltacoronavirus_suis	PoCoV_HKU15	Delta_HKU15
In this study	PP845626		503	partial, RdRp		2021-11-11	China	Shanghai	Shanghai	feces					Anseriformes	Anatidae	Anas	Anas platyrhynchos	yes	Coronaviridae	Orthocoronavirinae	Gammacoronavirus	Igacovirus	Gammacoronavirus_Anatiscopes(NL3)	DuCoV_NL3	Gamma_NL3
In this study	PP845636		503	partial, RdRp		2021-11-11	China	Shanghai	Shanghai	feces					Anseriformes	Anatidae	Anas	Anas platyrhynchos	yes	Coronaviridae	Orthocoronavirinae	Gammacoronavirus	Igacovirus	Gammacoronavirus_Anatiscopes(NL3)	DuCoV_NL3	Gamma_NL3
In this study	PP845627		503	partial, RdRp		2021-11-11	China	Shanghai	Shanghai	feces					Anseriformes	Anatidae	Anas	Anas platyrhynchos	yes	Coronaviridae	Orthocoronavirinae	Gammacoronavirus	Igacovirus	Gammacoronavirus_Anatiscopes(NL3)	DuCoV_NL3	Gamma_NL3
In this study	PP845628		503	partial, RdRp		2021-11-11	China	Shanghai	Shanghai	feces					Anseriformes	Anatidae	Anas	Anas poecilorhyncha	yes	Coronaviridae	Orthocoronavirinae	Gammacoronavirus	Igacovirus	Gammacoronavirus_Anatiscopes(NL3)	DuCoV_NL3	Gamma_NL3
In this study	PP845637		503	partial, RdRp		2021-11-11	China	Shanghai	Shanghai	feces					Anseriformes	Anatidae	Anas	Anas platyrhynchos	yes	Coronaviridae	Orthocoronavirinae	Gammacoronavirus	Igacovirus	Gammacoronavirus_Anatiscopes(NL3)	DuCoV_NL3	Gamma_NL3
In this study	PP845685		503	partial, RdRp		2019-10-29	China	Shanghai	Shanghai	Cloacal swabs					Anseriformes	Anatidae	Anas	Anas zonorhyncha	yes	Coronaviridae	Orthocoronavirinae	Gammacoronavirus	Igacovirus	Gammacoronavirus_Anatiscopes(NL3)	DuCoV_NL3	Gamma_NL3
In this study	PP845516		503	partial, RdRp		2021-11-11	China	Shanghai	Shanghai	feces					Anseriformes	Anatidae	Anas	Anas platyrhynchos	yes	Coronaviridae	Orthocoronavirinae	Gammacoronavirus	Igacovirus	Gammacoronavirus_Anatiscopes(NL3)	DuCoV_NL3	Gamma_NL3
In this study	PP845523		503	partial, RdRp		2021-11-11	China	Shanghai	Shanghai	feces					Anseriformes	Anatidae	Anas	Anas platyrhynchos	yes	Coronaviridae	Orthocoronavirinae	Gammacoronavirus	Igacovirus	Gammacoronavirus_Anatiscopes(NL3)	DuCoV_NL3	Gamma_NL3
In this study	PP845671		503	partial, RdRp		2021-11-11	China	Shanghai	Shanghai	feces					Anseriformes	Anatidae	Anas	Anas platyrhynchos	yes	Coronaviridae	Orthocoronavirinae	Gammacoronavirus	Igacovirus	Gammacoronavirus_Anatiscopes(NL3)	DuCoV_NL3	Gamma_NL3
In this study	PP845717		503	partial, RdRp		2021-11-11	China	Shanghai	Shanghai	feces					Anseriformes	Anatidae	Anas	Anas crecca	yes	Coronaviridae	Orthocoronavirinae	Gammacoronavirus	Igacovirus	Gammacoronavirus_Anatiscopes(NL3)	DuCoV_NL3	Gamma_NL3
In this study	PP845670		503	partial, RdRp		2021-11-11	China	Shanghai	Shanghai	feces					Anseriformes	Anatidae	Anas	Anas crecca	yes	Coronaviridae	Orthocoronavirinae	Gammacoronavirus	Igacovirus	Gammacoronavirus_Anatiscopes(NL3)	DuCoV_NL3	Gamma_NL3
In this study	PP845522		503	partial, RdRp		2021-11-11	China	Shanghai	Shanghai	feces					Anseriformes	Anatidae	Anas	Anas platyrhynchos	yes	Coronaviridae	Orthocoronavirinae	Gammacoronavirus	Igacovirus	Gammacoronavirus_Anatiscopes(NL3)	DuCoV_NL3	Gamma_NL3
In this study	PP845578		503	partial, RdRp		2021-11-26	China	Shanghai	Shanghai	feces					Anseriformes	Anatidae	Anas	Anas platyrhynchos	yes	Coronaviridae	Orthocoronavirinae	Gammacoronavirus	Igacovirus	Gammacoronavirus_Anatiscopes(NL3)	DuCoV_NL3	Gamma_NL3
In this study	PP845611		503	partial, RdRp		2021-11-26	China	Shanghai	Shanghai	feces					Anseriformes	Anatidae	Anas	Anas platyrhynchos	yes	Coronaviridae	Orthocoronavirinae	Gammacoronavirus	Igacovirus	Gammacoronavirus_Anatiscopes(NL3)	DuCoV_NL3	Gamma_NL3
In this study	PP845612		503	partial, RdRp		2021-11-26	China	Shanghai	Shanghai	feces					Anseriformes	Anatidae	Anas	Anas platyrhynchos	yes	Coronaviridae	Orthocoronavirinae	Gammacoronavirus	Igacovirus	Gammacoronavirus_Anatiscopes(NL3)	DuCoV_NL3	Gamma_NL3
In this study	PP845521		503	partial, RdRp		2021-11-26	China	Shanghai	Shanghai	feces					Anseriformes	Anatidae	Anas	Anas platyrhynchos	yes	Coronaviridae	Orthocoronavirinae	Gammacoronavirus	Igacovirus	Gammacoronavirus_Anatiscopes(NL3)	DuCoV_NL3	Gamma_NL3
In this study	PP845686		503	partial, RdRp		2019-10-29	China	Shanghai	Shanghai	Cloacal swabs					Anseriformes	Anatidae	Anas	Anas platyrhynchos	yes	Coronaviridae	Orthocoronavirinae	Gammacoronavirus	Igacovirus	Gammacoronavirus_Anatiscopes(NL3)	DuCoV_NL3	Gamma_NL3
In this study	PP845622		503	partial, RdRp		2021-11-26	China	Shanghai	Shanghai	feces					Anseriformes	Anatidae	Anas	Anas platyrhynchos	yes	Coronaviridae	Orthocoronavirinae	Gammacoronavirus	Igacovirus	Gammacoronavirus_Anatiscopes(NL3)	DuCoV_NL3	Gamma_NL3
In this study	PP845639		503	partial, RdRp		2021-11-26	China	Shanghai	Shanghai	feces					Anseriformes	Anatidae	Anas	Anas crecca	yes	Coronaviridae	Orthocoronavirinae	Gammacoronavirus	Igacovirus	Gammacoronavirus_Anatiscopes(NL3)	DuCoV_NL3	Gamma_NL3
In this study	PP845629		503	partial, RdRp		2021-11-26	China	Shanghai	Shanghai	feces					Pelecaniformes	Ardeidae	Ardea	Ardea modesta		Coronaviridae	Orthocoronavirinae	Gammacoronavirus	Igacovirus	Gammacoronavirus_Anatiscopes(NL3)	DuCoV_NL3	Gamma_NL3
In this study	PP845630		503	partial, RdRp		2021-11-26	China	Shanghai	Shanghai	feces					Anseriformes	Anatidae	Anas	Anas platyrhynchos	yes	Coronaviridae	Orthocoronavirinae	Gammacoronavirus	Igacovirus	Gammacoronavirus_Anatiscopes(NL3)	DuCoV_NL3	Gamma_NL3
In this study	PP845631		503	partial, RdRp		2021-11-26	China	Shanghai	Shanghai	feces					Anseriformes	Anatidae	Anas	Anas platyrhynchos	yes	Coronaviridae	Orthocoronavirinae	Gammacoronavirus	Igacovirus	Gammacoronavirus_Anatiscopes(NL3)	DuCoV_NL3	Gamma_NL3
In this study	PP845632		503	partial, RdRp		2021-11-26	China	Shanghai	Shanghai	feces					Anseriformes	Anatidae	Anas	Anas platyrhynchos	yes	Coronaviridae	Orthocoronavirinae	Gammacoronavirus	Igacovirus	Gammacoronavirus_Anatiscopes(NL3)	DuCoV_NL3	Gamma_NL3
In this study	PP845518		503	partial, RdRp		2021-11-26	China	Shanghai	Shanghai	feces					Anseriformes	Anatidae	Anas	Anas platyrhynchos	yes	Coronaviridae	Orthocoronavirinae	Gammacoronavirus	Igacovirus	Gammacoronavirus_Anatiscopes(NL3)	DuCoV_NL3	Gamma_NL3
In this study	PP845519		503	partial, RdRp		2021-11-26	China	Shanghai	Shanghai	feces					Anseriformes	Anatidae	Anas	Anas platyrhynchos	yes	Coronaviridae	Orthocoronavirinae	Gammacoronavirus	Igacovirus	Gammacoronavirus_Anatiscopes(NL3)	DuCoV_NL3	Gamma_NL3
In this study	PP845548		503	partial, RdRp		2021-11-26	China	Shanghai	Shanghai	feces					Anseriformes	Anatidae	Anas	Anas platyrhynchos	yes	Coronaviridae	Orthocoronavirinae	Gammacoronavirus	Igacovirus	Gammacoronavirus_Anatiscopes(NL3)	DuCoV_NL3	Gamma_NL3
In this study	PP845633		503	partial, RdRp		2021-11-26	China	Shanghai	Shanghai	feces					Anseriformes	Anatidae	Anas	Anas poecilorhyncha	yes	Coronaviridae	Orthocoronavirinae	Gammacoronavirus	Igacovirus	Gammacoronavirus_Anatiscopes(NL3)	DuCoV_NL3	Gamma_NL3
In this study	PP845687		503	partial, RdRp		2019-10-29	China	Shanghai	Shanghai	Cloacal swabs					Anseriformes	Anatidae	Anas	Anas zonorhyncha	yes	Coronaviridae	Orthocoronavirinae	Gammacoronavirus	Igacovirus	Gammacoronavirus_Anatiscopes(NL3)	DuCoV_NL3	Gamma_NL3
In this study	PP845634		503	partial, RdRp		2021-11-26	China	Shanghai	Shanghai	feces					Anseriformes	Anatidae	Anas	Anas platyrhynchos	yes	Coronaviridae	Orthocoronavirinae	Gammacoronavirus	Igacovirus	Gammacoronavirus_Anatiscopes(NL3)	DuCoV_NL3	Gamma_NL3
In this study	PP845767		500	partial, RdRp		2022-08-23	China	Shanghai	Shanghai	Cloacal swabs					Charadriiformes	Scolopacidae	Calidris	Calidris subminuta	yes	Coronaviridae	Orthocoronavirinae	Deltacoronavirus	Buldecovirus	Deltacoronavirus_Sandpipers(NL2)	SandCoV_NL2	Delta_NL2
In this study	PP845782		500	partial, RdRp		2022-08-23	China	Shanghai	Shanghai	Cloacal swabs					Charadriiformes	Scolopacidae	Calidris	Calidris subminuta	yes	Coronaviridae	Orthocoronavirinae	Deltacoronavirus	Buldecovirus	Deltacoronavirus_Sandpipers(NL2)	SandCoV_NL2	Delta_NL2
In this study	PP845742		503	partial, RdRp		2022-09-07	China	Shanghai	Shanghai	feces					Charadriiformes	Scolopacidae	Numenius	Numenius phaeopus	yes	Coronaviridae	Orthocoronavirinae	Gammacoronavirus	Igacovirus	Gammacoronavirus_Anatiscopes(NL3)	DuCoV_NL3	Gamma_NL3
In this study	PP845748		503	partial, RdRp		2022-09-07	China	Shanghai	Shanghai	feces					Charadriiformes	Scolopacidae	Numenius	Numenius phaeopus	yes	Coronaviridae	Orthocoronavirinae	Gammacoronavirus	Igacovirus	Gammacoronavirus_Anatiscopes(NL3)	DuCoV_NL3	Gamma_NL3
In this study	PP845749		503	partial, RdRp		2022-09-07	China	Shanghai	Shanghai	feces					Charadriiformes	Scolopacidae	Numenius	Numenius phaeopus	yes	Coronaviridae	Orthocoronavirinae	Gammacoronavirus	Igacovirus	Gammacoronavirus_Anatiscopes(NL3)	DuCoV_NL3	Gamma_NL3
In this study	PP845724		503	partial, RdRp		2022-09-07	China	Shanghai	Shanghai	feces					Charadriiformes	Scolopacidae	Tringa	Tringa totanus	yes	Coronaviridae	Orthocoronavirinae	Gammacoronavirus	Igacovirus	Gammacoronavirus_Anatiscopes(NL3)	DuCoV_NL3	Gamma_NL3
In this study	PP845743		503	partial, RdRp		2022-09-07	China	Shanghai	Shanghai	feces					Charadriiformes	Scolopacidae	Numenius	Numenius phaeopus	yes	Coronaviridae	Orthocoronavirinae	Gammacoronavirus	Igacovirus	Gammacoronavirus_Anatiscopes(NL3)	DuCoV_NL3	Gamma_NL3
In this study	PP845744		503	partial, RdRp		2022-09-07	China	Shanghai	Shanghai	feces					Charadriiformes	Scolopacidae	Numenius	Numenius phaeopus	yes	Coronaviridae	Orthocoronavirinae	Gammacoronavirus	Igacovirus	Gammacoronavirus_Anatiscopes(NL3)	DuCoV_NL3	Gamma_NL3
In this study	PP845745		503	partial, RdRp		2022-09-07	China	Shanghai	Shanghai	feces					Charadriiformes	Scolopacidae	Xenus	Xenus cinereus	yes	Coronaviridae	Orthocoronavirinae	Gammacoronavirus	Igacovirus	Gammacoronavirus_Anatiscopes(NL3)	DuCoV_NL3	Gamma_NL3
In this study	PP845558		503	partial, RdRp		2019-11-02	China	Shanghai	Shanghai	Cloacal swabs					Anseriformes	Anatidae	Anas	Anas zonorhyncha	yes	Coronaviridae	Orthocoronavirinae	Gammacoronavirus	Igacovirus	Gammacoronavirus_Anatiscopes(NL3)	DuCoV_NL3	Gamma_NL3
In this study	PP845747		503	partial, RdRp		2022-09-07	China	Shanghai	Shanghai	feces					Charadriiformes	Scolopacidae	Numenius	Numenius phaeopus	yes	Coronaviridae	Orthocoronavirinae	Gammacoronavirus	Igacovirus	Gammacoronavirus_Anatiscopes(NL3)	DuCoV_NL3	Gamma_NL3
In this study	PP845746		503	partial, RdRp		2022-09-07	China	Shanghai	Shanghai	feces					Charadriiformes	Scolopacidae	Numenius	Numenius phaeopus	yes	Coronaviridae	Orthocoronavirinae	Gammacoronavirus	Igacovirus	Gammacoronavirus_Anatiscopes(NL3)	DuCoV_NL3	Gamma_NL3
In this study	PP845790		500	partial, RdRp		2022-08-16	China	Shanghai	Shanghai	feces					Charadriiformes	Scolopacidae	Tringa	Tringa totanus	yes	Coronaviridae	Orthocoronavirinae	Deltacoronavirus	Herdecovirus	Deltacoronavirus_nycticoracis	NHCoV_HKU19	Delta_HKU19
In this study	PP845765		500	partial, RdRp		2022-08-16	China	Shanghai	Shanghai	feces					Charadriiformes	Scolopacidae	Tringa	Tringa nebularia	yes	Coronaviridae	Orthocoronavirinae	Deltacoronavirus	Buldecovirus	Deltacoronavirus_Sandpipers(NL2)	SandCoV_NL2	Delta_NL2
In this study	PP845755		500	partial, RdRp		2022-09-09	China	Shanghai	Shanghai	feces					Charadriiformes	Charadriidae	Charadrius	Charadrius alexandrinus	yes	Coronaviridae	Orthocoronavirinae	Deltacoronavirus	Buldecovirus	Deltacoronavirus_zosteropis	WECoV_HKU16	Delta_HKU16
In this study	PP845705		503	partial, RdRp		2022-09-09	China	Shanghai	Shanghai	feces					Charadriiformes	Charadriidae	Charadrius	Charadrius alexandrinus	yes	Coronaviridae	Orthocoronavirinae	Gammacoronavirus	Igacovirus	Gammacoronavirus_Anatiscopes(NL3)	DuCoV_NL3	Gamma_NL3
In this study	PP845754		500	partial, RdRp		2022-09-09	China	Shanghai	Shanghai	feces					Charadriiformes	Scolopacidae	Calidris	Calidris ruficollis	yes	Coronaviridae	Orthocoronavirinae	Deltacoronavirus	Buldecovirus	Deltacoronavirus_zosteropis	WECoV_HKU16	Delta_HKU16
In this study	PP845779		500	partial, RdRp		2022-09-19	China	Shanghai	Shanghai	feces					Charadriiformes	Scolopacidae	Calidris	Calidris tenuirostris	yes	Coronaviridae	Orthocoronavirinae	Deltacoronavirus	Buldecovirus	Deltacoronavirus_Sandpipers(NL2)	SandCoV_NL2	Delta_NL2
In this study	PP845734		503	partial, RdRp		2022-09-19	China	Shanghai	Shanghai	feces					Charadriiformes	Scolopacidae	Calidris	Calidris tenuirostris	yes	Coronaviridae	Orthocoronavirinae	Gammacoronavirus	Igacovirus	Gammacoronavirus_Anatiscopes(NL3)	DuCoV_NL3	Gamma_NL3
In this study	PP845776		500	partial, RdRp		2022-09-19	China	Shanghai	Shanghai	feces					Charadriiformes	Scolopacidae	Calidris	Calidris tenuirostris	yes	Coronaviridae	Orthocoronavirinae	Deltacoronavirus	Buldecovirus	Deltacoronavirus_Sandpipers(NL2)	SandCoV_NL2	Delta_NL2
In this study	PP845726		503	partial, RdRp		2022-09-19	China	Shanghai	Shanghai	feces					Charadriiformes	Scolopacidae	Calidris	Calidris tenuirostris	yes	Coronaviridae	Orthocoronavirinae	Gammacoronavirus	Igacovirus	Gammacoronavirus_Anatiscopes(NL3)	DuCoV_NL3	Gamma_NL3
In this study	PP845768		500	partial, RdRp		2022-09-19	China	Shanghai	Shanghai	feces					Charadriiformes	Scolopacidae	Calidris	Calidris tenuirostris	yes	Coronaviridae	Orthocoronavirinae	Deltacoronavirus	Buldecovirus	Deltacoronavirus_Sandpipers(NL2)	SandCoV_NL2	Delta_NL2
In this study	PP845727		503	partial, RdRp		2022-09-19	China	Shanghai	Shanghai	feces					Charadriiformes	Scolopacidae	Calidris	Calidris tenuirostris	yes	Coronaviridae	Orthocoronavirinae	Gammacoronavirus	Igacovirus	Gammacoronavirus_Anatiscopes(NL3)	DuCoV_NL3	Gamma_NL3
In this study	PP845769		500	partial, RdRp		2022-09-19	China	Shanghai	Shanghai	feces					Charadriiformes	Scolopacidae	Calidris	Calidris tenuirostris	yes	Coronaviridae	Orthocoronavirinae	Deltacoronavirus	Buldecovirus	Deltacoronavirus_Sandpipers(NL2)	SandCoV_NL2	Delta_NL2
In this study	PP845559		503	partial, RdRp		2019-11-09	China	Shanghai	Shanghai	Cloacal swabs					Anseriformes	Anatidae	Anas	Anas platyrhynchos	yes	Coronaviridae	Orthocoronavirinae	Gammacoronavirus	Igacovirus	Gammacoronavirus_Anatiscopes(NL3)	DuCoV_NL3	Gamma_NL3
In this study	PP845728		503	partial, RdRp		2022-09-19	China	Shanghai	Shanghai	feces					Charadriiformes	Scolopacidae	Calidris	Calidris tenuirostris	yes	Coronaviridae	Orthocoronavirinae	Gammacoronavirus	Igacovirus	Gammacoronavirus_Anatiscopes(NL3)	DuCoV_NL3	Gamma_NL3
In this study	PP845761		500	partial, RdRp		2022-09-19	China	Shanghai	Shanghai	feces					Charadriiformes	Scolopacidae	Calidris	Calidris tenuirostris	yes	Coronaviridae	Orthocoronavirinae	Deltacoronavirus	Buldecovirus	Deltacoronavirus_Sandpipers(NL2)	SandCoV_NL2	Delta_NL2
In this study	PP845735		503	partial, RdRp		2022-09-19	China	Shanghai	Shanghai	feces					Charadriiformes	Scolopacidae	Calidris	Calidris tenuirostris	yes	Coronaviridae	Orthocoronavirinae	Gammacoronavirus	Igacovirus	Gammacoronavirus_Anatiscopes(NL3)	DuCoV_NL3	Gamma_NL3
In this study	PP845770		500	partial, RdRp		2022-09-19	China	Shanghai	Shanghai	feces					Charadriiformes	Scolopacidae	Calidris	Calidris tenuirostris	yes	Coronaviridae	Orthocoronavirinae	Deltacoronavirus	Buldecovirus	Deltacoronavirus_Sandpipers(NL2)	SandCoV_NL2	Delta_NL2
In this study	PP845762		500	partial, RdRp		2022-09-19	China	Shanghai	Shanghai	feces					Charadriiformes	Scolopacidae	Calidris	Calidris tenuirostris	yes	Coronaviridae	Orthocoronavirinae	Deltacoronavirus	Buldecovirus	Deltacoronavirus_Sandpipers(NL2)	SandCoV_NL2	Delta_NL2
In this study	PP845729		503	partial, RdRp		2022-09-19	China	Shanghai	Shanghai	feces					Charadriiformes	Scolopacidae	Calidris	Calidris tenuirostris	yes	Coronaviridae	Orthocoronavirinae	Gammacoronavirus	Igacovirus	Gammacoronavirus_Anatiscopes(NL3)	DuCoV_NL3	Gamma_NL3
In this study	PP845771		500	partial, RdRp		2022-09-19	China	Shanghai	Shanghai	feces					Charadriiformes	Scolopacidae	Calidris	Calidris tenuirostris	yes	Coronaviridae	Orthocoronavirinae	Deltacoronavirus	Buldecovirus	Deltacoronavirus_Sandpipers(NL2)	SandCoV_NL2	Delta_NL2
In this study	PP845778		500	partial, RdRp		2022-09-19	China	Shanghai	Shanghai	feces					Charadriiformes	Scolopacidae	Calidris	Calidris tenuirostris	yes	Coronaviridae	Orthocoronavirinae	Deltacoronavirus	Buldecovirus	Deltacoronavirus_Sandpipers(NL2)	SandCoV_NL2	Delta_NL2
In this study	PP845730		503	partial, RdRp		2022-09-19	China	Shanghai	Shanghai	feces					Charadriiformes	Scolopacidae	Calidris	Calidris tenuirostris	yes	Coronaviridae	Orthocoronavirinae	Gammacoronavirus	Igacovirus	Gammacoronavirus_Anatiscopes(NL3)	DuCoV_NL3	Gamma_NL3
In this study	PP845772		500	partial, RdRp		2022-09-19	China	Shanghai	Shanghai	feces					Charadriiformes	Scolopacidae	Calidris	Calidris tenuirostris	yes	Coronaviridae	Orthocoronavirinae	Deltacoronavirus	Buldecovirus	Deltacoronavirus_Sandpipers(NL2)	SandCoV_NL2	Delta_NL2
In this study	PP845763		500	partial, RdRp		2022-09-19	China	Shanghai	Shanghai	feces					Charadriiformes	Scolopacidae	Calidris	Calidris tenuirostris	yes	Coronaviridae	Orthocoronavirinae	Deltacoronavirus	Buldecovirus	Deltacoronavirus_Sandpipers(NL2)	SandCoV_NL2	Delta_NL2
In this study	PP845773		500	partial, RdRp		2022-09-19	China	Shanghai	Shanghai	feces					Charadriiformes	Scolopacidae	Calidris	Calidris tenuirostris	yes	Coronaviridae	Orthocoronavirinae	Deltacoronavirus	Buldecovirus	Deltacoronavirus_Sandpipers(NL2)	SandCoV_NL2	Delta_NL2
In this study	PP845731		503	partial, RdRp		2022-09-19	China	Shanghai	Shanghai	feces					Charadriiformes	Scolopacidae	Calidris	Calidris tenuirostris	yes	Coronaviridae	Orthocoronavirinae	Gammacoronavirus	Igacovirus	Gammacoronavirus_Anatiscopes(NL3)	DuCoV_NL3	Gamma_NL3
In this study	PP845780		500	partial, RdRp		2022-09-19	China	Shanghai	Shanghai	feces					Charadriiformes	Scolopacidae	Calidris	Calidris tenuirostris	yes	Coronaviridae	Orthocoronavirinae	Deltacoronavirus	Buldecovirus	Deltacoronavirus_Sandpipers(NL2)	SandCoV_NL2	Delta_NL2
In this study	PP845777		500	partial, RdRp		2022-09-19	China	Shanghai	Shanghai	feces					Charadriiformes	Scolopacidae	Calidris	Calidris tenuirostris	yes	Coronaviridae	Orthocoronavirinae	Deltacoronavirus	Buldecovirus	Deltacoronavirus_Sandpipers(NL2)	SandCoV_NL2	Delta_NL2
In this study	PP845774		500	partial, RdRp		2022-09-19	China	Shanghai	Shanghai	feces					Charadriiformes	Scolopacidae	Calidris	Calidris tenuirostris	yes	Coronaviridae	Orthocoronavirinae	Deltacoronavirus	Buldecovirus	Deltacoronavirus_Sandpipers(NL2)	SandCoV_NL2	Delta_NL2
In this study	PP845732		503	partial, RdRp		2022-09-19	China	Shanghai	Shanghai	feces					Charadriiformes	Scolopacidae	Calidris	Calidris tenuirostris	yes	Coronaviridae	Orthocoronavirinae	Gammacoronavirus	Igacovirus	Gammacoronavirus_Anatiscopes(NL3)	DuCoV_NL3	Gamma_NL3
In this study	PP845733		503	partial, RdRp		2022-09-19	China	Shanghai	Shanghai	feces					Charadriiformes	Scolopacidae	Calidris	Calidris tenuirostris	yes	Coronaviridae	Orthocoronavirinae	Gammacoronavirus	Igacovirus	Gammacoronavirus_Anatiscopes(NL3)	DuCoV_NL3	Gamma_NL3
In this study	PP845775		500	partial, RdRp		2022-09-19	China	Shanghai	Shanghai	feces					Charadriiformes	Scolopacidae	Calidris	Calidris tenuirostris	yes	Coronaviridae	Orthocoronavirinae	Deltacoronavirus	Buldecovirus	Deltacoronavirus_Sandpipers(NL2)	SandCoV_NL2	Delta_NL2
In this study	PP845793		500	partial, RdRp		2022-07-12	China	Shanghai	Shanghai	tissue					Pelecaniformes	Ardeidae	Egretta	Egretta garzetta	yes	Coronaviridae	Orthocoronavirinae	Deltacoronavirus	Herdecovirus	Deltacoronavirus_nycticoracis	NHCoV_HKU19	Delta_HKU19
In this study	PP845672		503	partial, RdRp		2020-09-24	China	Shanghai	Shanghai	Cloacal swabs					Charadriiformes	Scolopacidae	Limosa	Limosa lapponica	yes	Coronaviridae	Orthocoronavirinae	Gammacoronavirus	Igacovirus	Gammacoronavirus_Anatiscopes(NL3)	DuCoV_NL3	Gamma_NL3
In this study	PP845795		500	partial, RdRp		2022-08-19	China	Shanghai	Shanghai	tissue					Galliformes	Phasianidae	Phasianus	Phasianus colchicus		Coronaviridae	Orthocoronavirinae	Deltacoronavirus	Herdecovirus	Deltacoronavirus_nycticoracis	NHCoV_HKU19	Delta_HKU19
In this study	PP845789		500	partial, RdRp		2022-09-15	China	Shanghai	Shanghai	feces					Pelecaniformes	Ardeidae	Nycticorax	Nycticorax nycticorax	yes	Coronaviridae	Orthocoronavirinae	Deltacoronavirus	Herdecovirus	Deltacoronavirus_nycticoracis	NHCoV_HKU19	Delta_HKU19
In this study	PP845788		500	partial, RdRp		2022-09-20	China	Shanghai	Shanghai	feces					Pelecaniformes	Ardeidae	Bubulcus	Bubulcus ibis	yes	Coronaviridae	Orthocoronavirinae	Deltacoronavirus	Herdecovirus	Deltacoronavirus_nycticoracis	NHCoV_HKU19	Delta_HKU19
In this study	PP845792		500	partial, RdRp		2022-09-20	China	Shanghai	Shanghai	tissue					Pelecaniformes	Ardeidae	Egretta	Egretta garzetta	yes	Coronaviridae	Orthocoronavirinae	Deltacoronavirus	Herdecovirus	Deltacoronavirus_nycticoracis	NHCoV_HKU19	Delta_HKU19
In this study	PP845697		503	partial, RdRp		2020-09-24	China	Shanghai	Shanghai	Cloacal swabs					Charadriiformes	Scolopacidae	Limosa	Limosa lapponica	yes	Coronaviridae	Orthocoronavirinae	Gammacoronavirus	Igacovirus	Gammacoronavirus_Anatiscopes(NL3)	DuCoV_NL3	Gamma_NL3
In this study	PP845673		503	partial, RdRp		2020-09-24	China	Shanghai	Shanghai	Cloacal swabs					Charadriiformes	Scolopacidae	Limosa	Limosa lapponica	yes	Coronaviridae	Orthocoronavirinae	Gammacoronavirus	Igacovirus	Gammacoronavirus_Anatiscopes(NL3)	DuCoV_NL3	Gamma_NL3
In this study	PP845674		503	partial, RdRp		2020-09-28	China	Shanghai	Shanghai	Cloacal swabs					Charadriiformes	Scolopacidae	Calidris	Calidris alpina	yes	Coronaviridae	Orthocoronavirinae	Gammacoronavirus	Igacovirus	Gammacoronavirus_Anatiscopes(NL3)	DuCoV_NL3	Gamma_NL3
In this study	PP845592		503	partial, RdRp		2020-11-02	China	Shanghai	Shanghai	cloacal swab					Anseriformes	Anatidae	Anas	Anas crecca	yes	Coronaviridae	Orthocoronavirinae	Gammacoronavirus	Igacovirus	Gammacoronavirus_Anatiscopes(NL3)	DuCoV_NL3	Gamma_NL3
In this study	PP845596		503	partial, RdRp		2020-11-02	China	Shanghai	Shanghai	cloacal swab					Anseriformes	Anatidae	Anas	Anas zonorhyncha	yes	Coronaviridae	Orthocoronavirinae	Gammacoronavirus	Igacovirus	Gammacoronavirus_Anatiscopes(NL3)	DuCoV_NL3	Gamma_NL3
In this study	PP845655		503	partial, RdRp		2020-10-31	China	Shanghai	Shanghai	Cloacal swabs					Anseriformes	Anatidae	Anas	Anas crecca	yes	Coronaviridae	Orthocoronavirinae	Gammacoronavirus	Igacovirus	Gammacoronavirus_Anatiscopes(NL3)	DuCoV_NL3	Gamma_NL3
In this study	PP845598		503	partial, RdRp		2021-11-07	China	Shanghai	Shanghai	cloacal swab					Anseriformes	Anatidae	Anas	Anas crecca	yes	Coronaviridae	Orthocoronavirinae	Gammacoronavirus	Igacovirus	Gammacoronavirus_Anatiscopes(NL3)	DuCoV_NL3	Gamma_NL3
In this study	PP845549		503	partial, RdRp		2021-11-07	China	Shanghai	Shanghai	cloacal swab					Anseriformes	Anatidae	Anas	Anas crecca	yes	Coronaviridae	Orthocoronavirinae	Gammacoronavirus	Igacovirus	Gammacoronavirus_Anatiscopes(NL3)	DuCoV_NL3	Gamma_NL3
In this study	PP845535		503	partial, RdRp		2023-01-11	China	Shanghai	Shanghai	Cloacal swabs					Anseriformes	Anatidae	Anas	Anas platyrhynchos	yes	Coronaviridae	Orthocoronavirinae	Gammacoronavirus	Igacovirus	Gammacoronavirus_Anatiscopes(NL3)	DuCoV_NL3	Gamma_NL3
In this study	PP845751		503	partial, RdRp		2023-01-11	China	Shanghai	Shanghai	Cloacal swabs					Anseriformes	Anatidae	Cygnus	Cygnus columbianus	yes	Coronaviridae	Orthocoronavirinae	Gammacoronavirus	Brangacovirus	Gammacoronavirus_brantae	BcanCoV_CB17	Gamma_CB17
In this study	NA		503	partial, RdRp		2023-01-11	China	Shanghai	Shanghai	Cloacal swabs					Anseriformes	Anatidae	Anas	Anas platyrhynchos	yes	Coronaviridae	Orthocoronavirinae	Gammacoronavirus	Igacovirus	Gammacoronavirus_Anatiscopes(NL3)	DuCoV_NL3	Gamma_NL3
In this study	PP845644		503	partial, RdRp		2023-01-11	China	Shanghai	Shanghai	Cloacal swabs					Anseriformes	Anatidae	Anas	Anas platyrhynchos	yes	Coronaviridae	Orthocoronavirinae	Gammacoronavirus	Igacovirus	Gammacoronavirus_Anatiscopes(NL3)	DuCoV_NL3	Gamma_NL3
In this study	PP845652		503	partial, RdRp		2023-01-18	China	Shanghai	Shanghai	Cloacal swabs					Anseriformes	Anatidae	Anas	Anas platyrhynchos	yes	Coronaviridae	Orthocoronavirinae	Gammacoronavirus	Igacovirus	Gammacoronavirus_Anatiscopes(NL3)	DuCoV_NL3	Gamma_NL3
In this study	PP845676		503	partial, RdRp		2023-01-18	China	Shanghai	Shanghai	Cloacal swabs					Anseriformes	Anatidae	Anas	Anas platyrhynchos	yes	Coronaviridae	Orthocoronavirinae	Gammacoronavirus	Igacovirus	Gammacoronavirus_Anatiscopes(NL3)	DuCoV_NL3	Gamma_NL3
In this study	PP845647		503	partial, RdRp		2023-01-18	China	Shanghai	Shanghai	Cloacal swabs					Anseriformes	Anatidae	Anas	Anas platyrhynchos	yes	Coronaviridae	Orthocoronavirinae	Gammacoronavirus	Igacovirus	Gammacoronavirus_Anatiscopes(NL3)	DuCoV_NL3	Gamma_NL3
In this study	PP845725		503	partial, RdRp		2023-04-25	China	Shanghai	Shanghai	Cloacal swabs					Charadriiformes	Scolopacidae	Arenaria	Arenaria interpres	yes	Coronaviridae	Orthocoronavirinae	Gammacoronavirus	Igacovirus	Gammacoronavirus_Anatiscopes(NL3)	DuCoV_NL3	Gamma_NL3
In this study	PP845690		503	partial, RdRp		2023-02-13	China	Shanghai	Shanghai	Cloacal swabs					Passeriformes	Sturnidae	Acridotheres	Acridotheres cristatellus		Coronaviridae	Orthocoronavirinae	Gammacoronavirus	Igacovirus	Gammacoronavirus_Anatiscopes(NL3)	DuCoV_NL3	Gamma_NL3
In this study	PP845568		503	partial, RdRp		2020-10-31	China	Shanghai	Shanghai	Cloacal swabs					Anseriformes	Anatidae	Anas	Anas crecca	yes	Coronaviridae	Orthocoronavirinae	Gammacoronavirus	Igacovirus	Gammacoronavirus_Anatiscopes(NL3)	DuCoV_NL3	Gamma_NL3
In this study	PP845794		500	partial, RdRp		2022-10-09	China	Shanghai	Shanghai	Cloacal swabs					Pelecaniformes	Ardeidae	Nycticorax	Nycticorax nycticorax	yes	Coronaviridae	Orthocoronavirinae	Deltacoronavirus	Herdecovirus	Deltacoronavirus_nycticoracis	NHCoV_HKU19	Delta_HKU19
In this study	PP845764		500	partial, RdRp		2022-09-22	China	Shanghai	Shanghai	Cloacal swabs					Charadriiformes	Scolopacidae	Calidris	Calidris tenuirostris	yes	Coronaviridae	Orthocoronavirinae	Deltacoronavirus	Buldecovirus	Deltacoronavirus_Sandpipers(NL2)	SandCoV_NL2	Delta_NL2
In this study	PP845677		503	partial, RdRp		2022-09-23	China	Shanghai	Shanghai	Cloacal swabs					Charadriiformes	Scolopacidae	Limosa	Limosa limosa	yes	Coronaviridae	Orthocoronavirinae	Gammacoronavirus	Igacovirus	Gammacoronavirus_Anatiscopes(NL3)	DuCoV_NL3	Gamma_NL3
In this study	PP845753		500	partial, RdRp		2022-09-23	China	Shanghai	Shanghai	Cloacal swabs					Charadriiformes	Charadriidae	Charadrius	Charadrius leschenaultii	yes	Coronaviridae	Orthocoronavirinae	Deltacoronavirus	Buldecovirus	Deltacoronavirus_zosteropis	WECoV_HKU16	Delta_HKU16
In this study	PP845703		503	partial, RdRp		2022-09-26	China	Shanghai	Shanghai	Cloacal swabs					Charadriiformes	Scolopacidae	Limosa	Limosa limosa	yes	Coronaviridae	Orthocoronavirinae	Gammacoronavirus	Igacovirus	Gammacoronavirus_Anatiscopes(NL3)	DuCoV_NL3	Gamma_NL3
In this study	PP845736		503	partial, RdRp		2022-11-19	China	Shanghai	Shanghai	Cloacal swabs					Anseriformes	Anatidae	Anas	Anas platyrhynchos	yes	Coronaviridae	Orthocoronavirinae	Gammacoronavirus	Igacovirus	Gammacoronavirus_Anatiscopes(NL3)	DuCoV_NL3	Gamma_NL3
In this study	PP845706		503	partial, RdRp		2022-11-19	China	Shanghai	Shanghai	Cloacal swabs					Anseriformes	Anatidae	Anas	Anas acuta	yes	Coronaviridae	Orthocoronavirinae	Gammacoronavirus	Igacovirus	Gammacoronavirus_Anatiscopes(NL3)	DuCoV_NL3	Gamma_NL3
In this study	PP845653		503	partial, RdRp		2022-11-15	China	Shanghai	Shanghai	Cloacal swabs					Anseriformes	Anatidae	Anas	Anas platyrhynchos	yes	Coronaviridae	Orthocoronavirinae	Gammacoronavirus	Igacovirus	Gammacoronavirus_Anatiscopes(NL3)	DuCoV_NL3	Gamma_NL3
In this study	PP845524		503	partial, RdRp		2022-11-15	China	Shanghai	Shanghai	Cloacal swabs					Anseriformes	Anatidae	Anas	Anas zonorhyncha	yes	Coronaviridae	Orthocoronavirinae	Gammacoronavirus	Igacovirus	Gammacoronavirus_Anatiscopes(NL3)	DuCoV_NL3	Gamma_NL3
In this study	PP845707		503	partial, RdRp		2020-10-31	China	Shanghai	Shanghai	Cloacal swabs					Anseriformes	Anatidae	Anas	Anas crecca	yes	Coronaviridae	Orthocoronavirinae	Gammacoronavirus	Igacovirus	Gammacoronavirus_Anatiscopes(NL3)	DuCoV_NL3	Gamma_NL3
In this study	PP845525		503	partial, RdRp		2022-11-15	China	Shanghai	Shanghai	Cloacal swabs					Anseriformes	Anatidae	Anas	Anas zonorhyncha	yes	Coronaviridae	Orthocoronavirinae	Gammacoronavirus	Igacovirus	Gammacoronavirus_Anatiscopes(NL3)	DuCoV_NL3	Gamma_NL3
In this study	PP845704		503	partial, RdRp		2022-11-17	China	Shanghai	Shanghai	Cloacal swabs					Anseriformes	Anatidae	Anas	Anas zonorhyncha	yes	Coronaviridae	Orthocoronavirinae	Gammacoronavirus	Igacovirus	Gammacoronavirus_Anatiscopes(NL3)	DuCoV_NL3	Gamma_NL3
In this study	PP845737		503	partial, RdRp		2022-11-17	China	Shanghai	Shanghai	Cloacal swabs					Anseriformes	Anatidae	Anas	Anas zonorhyncha	yes	Coronaviridae	Orthocoronavirinae	Gammacoronavirus	Igacovirus	Gammacoronavirus_Anatiscopes(NL3)	DuCoV_NL3	Gamma_NL3
In this study	PP845642		503	partial, RdRp		2022-11-17	China	Shanghai	Shanghai	Cloacal swabs					Anseriformes	Anatidae	Anas	Anas zonorhyncha	yes	Coronaviridae	Orthocoronavirinae	Gammacoronavirus	Igacovirus	Gammacoronavirus_Anatiscopes(NL3)	DuCoV_NL3	Gamma_NL3
In this study	PP845738		503	partial, RdRp		2022-11-23	China	Shanghai	Shanghai	Cloacal swabs					Anseriformes	Anatidae	Anas	Anas platyrhynchos	yes	Coronaviridae	Orthocoronavirinae	Gammacoronavirus	Igacovirus	Gammacoronavirus_Anatiscopes(NL3)	DuCoV_NL3	Gamma_NL3
In this study	PP845740		503	partial, RdRp		2022-11-23	China	Shanghai	Shanghai	Cloacal swabs					Anseriformes	Anatidae	Anas	Anas platyrhynchos	yes	Coronaviridae	Orthocoronavirinae	Gammacoronavirus	Igacovirus	Gammacoronavirus_Anatiscopes(NL3)	DuCoV_NL3	Gamma_NL3
In this study	PP845643		503	partial, RdRp		2022-11-21	China	Shanghai	Shanghai	Cloacal swabs					Anseriformes	Anatidae	Anas	Anas acuta	yes	Coronaviridae	Orthocoronavirinae	Gammacoronavirus	Igacovirus	Gammacoronavirus_Anatiscopes(NL3)	DuCoV_NL3	Gamma_NL3
In this study	PP845526		503	partial, RdRp		2022-11-22	China	Shanghai	Shanghai	Cloacal swabs					Anseriformes	Anatidae	Anas	Anas platyrhynchos	yes	Coronaviridae	Orthocoronavirinae	Gammacoronavirus	Igacovirus	Gammacoronavirus_Anatiscopes(NL3)	DuCoV_NL3	Gamma_NL3
In this study	PP845648		503	partial, RdRp		2022-11-22	China	Shanghai	Shanghai	Cloacal swabs					Anseriformes	Anatidae	Anas	Anas platyrhynchos	yes	Coronaviridae	Orthocoronavirinae	Gammacoronavirus	Igacovirus	Gammacoronavirus_Anatiscopes(NL3)	DuCoV_NL3	Gamma_NL3
In this study	PP845527		503	partial, RdRp		2022-11-24	China	Shanghai	Shanghai	Cloacal swabs					Anseriformes	Anatidae	Anas	Anas platyrhynchos	yes	Coronaviridae	Orthocoronavirinae	Gammacoronavirus	Igacovirus	Gammacoronavirus_Anatiscopes(NL3)	DuCoV_NL3	Gamma_NL3
In this study	PP845691		503	partial, RdRp		2020-10-31	China	Shanghai	Shanghai	Cloacal swabs					Anseriformes	Anatidae	Anas	Anas crecca	yes	Coronaviridae	Orthocoronavirinae	Gammacoronavirus	Igacovirus	Gammacoronavirus_Anatiscopes(NL3)	DuCoV_NL3	Gamma_NL3
In this study	PP845739		503	partial, RdRp		2022-11-24	China	Shanghai	Shanghai	Cloacal swabs					Anseriformes	Anatidae	Anas	Anas platyrhynchos	yes	Coronaviridae	Orthocoronavirinae	Gammacoronavirus	Igacovirus	Gammacoronavirus_Anatiscopes(NL3)	DuCoV_NL3	Gamma_NL3
In this study	NA		609	partial, RdRp		2022-11-24	China	Shanghai	Shanghai	Cloacal swabs					Anseriformes	Anatidae	Anas	Anas platyrhynchos	yes	Coronaviridae	Orthocoronavirinae	Gammacoronavirus	Igacovirus	Gammacoronavirus_Anatiscopes(NL3)	DuCoV_NL3	Gamma_NL3
In this study	PP845741		609	partial, RdRp		2022-11-24	China	Shanghai	Shanghai	Cloacal swabs					Anseriformes	Anatidae	Anas	Anas platyrhynchos	yes	Coronaviridae	Orthocoronavirinae	Gammacoronavirus	Igacovirus	Gammacoronavirus_Anatiscopes(NL3)	DuCoV_NL3	Gamma_NL3
In this study	PP845661		503	partial, RdRp		2020-10-31	China	Shanghai	Shanghai	Cloacal swabs					Anseriformes	Anatidae	Anas	Anas crecca	yes	Coronaviridae	Orthocoronavirinae	Gammacoronavirus	Igacovirus	Gammacoronavirus_Anatiscopes(NL3)	DuCoV_NL3	Gamma_NL3
In this study	PP845708		503	partial, RdRp		2020-10-31	China	Shanghai	Shanghai	Cloacal swabs					Anseriformes	Anatidae	Anas	Anas crecca	yes	Coronaviridae	Orthocoronavirinae	Gammacoronavirus	Igacovirus	Gammacoronavirus_Anatiscopes(NL3)	DuCoV_NL3	Gamma_NL3
In this study	PP845709		503	partial, RdRp		2020-10-31	China	Shanghai	Shanghai	Cloacal swabs					Anseriformes	Anatidae	Anas	Anas crecca	yes	Coronaviridae	Orthocoronavirinae	Gammacoronavirus	Igacovirus	Gammacoronavirus_Anatiscopes(NL3)	DuCoV_NL3	Gamma_NL3
In this study	PP845656		503	partial, RdRp		2020-10-31	China	Shanghai	Shanghai	Cloacal swabs					Anseriformes	Anatidae	Anas	Anas crecca	yes	Coronaviridae	Orthocoronavirinae	Gammacoronavirus	Igacovirus	Gammacoronavirus_Anatiscopes(NL3)	DuCoV_NL3	Gamma_NL3
In this study	PP845693		503	partial, RdRp		2020-10-31	China	Shanghai	Shanghai	Cloacal swabs					Anseriformes	Anatidae	Anas	Anas crecca	yes	Coronaviridae	Orthocoronavirinae	Gammacoronavirus	Igacovirus	Gammacoronavirus_Anatiscopes(NL3)	DuCoV_NL3	Gamma_NL3
In this study	PP845694		503	partial, RdRp		2020-10-31	China	Shanghai	Shanghai	Cloacal swabs					Anseriformes	Anatidae	Anas	Anas crecca	yes	Coronaviridae	Orthocoronavirinae	Gammacoronavirus	Igacovirus	Gammacoronavirus_Anatiscopes(NL3)	DuCoV_NL3	Gamma_NL3
In this study	PP845695		503	partial, RdRp		2020-10-31	China	Shanghai	Shanghai	Cloacal swabs					Anseriformes	Anatidae	Anas	Anas crecca	yes	Coronaviridae	Orthocoronavirinae	Gammacoronavirus	Igacovirus	Gammacoronavirus_Anatiscopes(NL3)	DuCoV_NL3	Gamma_NL3
In this study	PP845714		503	partial, RdRp		2020-10-31	China	Shanghai	Shanghai	Cloacal swabs					Anseriformes	Anatidae	Anas	Anas crecca	yes	Coronaviridae	Orthocoronavirinae	Gammacoronavirus	Igacovirus	Gammacoronavirus_Anatiscopes(NL3)	DuCoV_NL3	Gamma_NL3
In this study	PP845713		503	partial, RdRp		2020-10-31	China	Shanghai	Shanghai	Cloacal swabs					Anseriformes	Anatidae	Anas	Anas crecca	yes	Coronaviridae	Orthocoronavirinae	Gammacoronavirus	Igacovirus	Gammacoronavirus_Anatiscopes(NL3)	DuCoV_NL3	Gamma_NL3
In this study	PP845715		503	partial, RdRp		2020-10-31	China	Shanghai	Shanghai	Cloacal swabs					Anseriformes	Anatidae	Anas	Anas crecca	yes	Coronaviridae	Orthocoronavirinae	Gammacoronavirus	Igacovirus	Gammacoronavirus_Anatiscopes(NL3)	DuCoV_NL3	Gamma_NL3
In this study	PP845710		503	partial, RdRp		2020-10-31	China	Shanghai	Shanghai	Cloacal swabs					Anseriformes	Anatidae	Anas	Anas crecca	yes	Coronaviridae	Orthocoronavirinae	Gammacoronavirus	Igacovirus	Gammacoronavirus_Anatiscopes(NL3)	DuCoV_NL3	Gamma_NL3
In this study	PP845696		503	partial, RdRp		2020-10-31	China	Shanghai	Shanghai	Cloacal swabs					Anseriformes	Anatidae	Anas	Anas crecca	yes	Coronaviridae	Orthocoronavirinae	Gammacoronavirus	Igacovirus	Gammacoronavirus_Anatiscopes(NL3)	DuCoV_NL3	Gamma_NL3
In this study	PP845711		503	partial, RdRp		2020-10-31	China	Shanghai	Shanghai	Cloacal swabs					Anseriformes	Anatidae	Anas	Anas crecca	yes	Coronaviridae	Orthocoronavirinae	Gammacoronavirus	Igacovirus	Gammacoronavirus_Anatiscopes(NL3)	DuCoV_NL3	Gamma_NL3
In this study	PP845550		503	partial, RdRp		2020-10-31	China	Shanghai	Shanghai	Cloacal swabs					Anseriformes	Anatidae	Anas	Anas platyrhynchos	yes	Coronaviridae	Orthocoronavirinae	Gammacoronavirus	Igacovirus	Gammacoronavirus_Anatiscopes(NL3)	DuCoV_NL3	Gamma_NL3
In this study	PP845547		503	partial, RdRp		2020-10-31	China	Shanghai	Shanghai	Cloacal swabs					Anseriformes	Anatidae	Anas	Anas acuta	yes	Coronaviridae	Orthocoronavirinae	Gammacoronavirus	Igacovirus	Gammacoronavirus_Anatiscopes(NL3)	DuCoV_NL3	Gamma_NL3
In this study	PP845657		503	partial, RdRp		2020-11-02	China	Shanghai	Shanghai	Cloacal swabs					Anseriformes	Anatidae	Anas	Anas crecca	yes	Coronaviridae	Orthocoronavirinae	Gammacoronavirus	Igacovirus	Gammacoronavirus_Anatiscopes(NL3)	DuCoV_NL3	Gamma_NL3
In this study	PP845658		503	partial, RdRp		2020-11-02	China	Shanghai	Shanghai	Cloacal swabs					Anseriformes	Anatidae	Anas	Anas crecca	yes	Coronaviridae	Orthocoronavirinae	Gammacoronavirus	Igacovirus	Gammacoronavirus_Anatiscopes(NL3)	DuCoV_NL3	Gamma_NL3
In this study	PP845662		503	partial, RdRp		2020-11-02	China	Shanghai	Shanghai	Cloacal swabs					Anseriformes	Anatidae	Anas	Anas crecca	yes	Coronaviridae	Orthocoronavirinae	Gammacoronavirus	Igacovirus	Gammacoronavirus_Anatiscopes(NL3)	DuCoV_NL3	Gamma_NL3
In this study	PP845675		503	partial, RdRp		2020-11-02	China	Shanghai	Shanghai	Cloacal swabs					Anseriformes	Anatidae	Anas	Anas crecca	yes	Coronaviridae	Orthocoronavirinae	Gammacoronavirus	Igacovirus	Gammacoronavirus_Anatiscopes(NL3)	DuCoV_NL3	Gamma_NL3
In this study	PP845569		503	partial, RdRp		2020-11-02	China	Shanghai	Shanghai	Cloacal swabs					Anseriformes	Anatidae	Anas	Anas crecca	yes	Coronaviridae	Orthocoronavirinae	Gammacoronavirus	Igacovirus	Gammacoronavirus_Anatiscopes(NL3)	DuCoV_NL3	Gamma_NL3
In this study	PP845659		503	partial, RdRp		2020-11-02	China	Shanghai	Shanghai	Cloacal swabs					Anseriformes	Anatidae	Anas	Anas crecca	yes	Coronaviridae	Orthocoronavirinae	Gammacoronavirus	Igacovirus	Gammacoronavirus_Anatiscopes(NL3)	DuCoV_NL3	Gamma_NL3
In this study	PP845720		503	partial, RdRp		2020-11-02	China	Shanghai	Shanghai	Cloacal swabs					Anseriformes	Anatidae	Anas	Anas crecca	yes	Coronaviridae	Orthocoronavirinae	Gammacoronavirus	Igacovirus	Gammacoronavirus_Anatiscopes(NL3)	DuCoV_NL3	Gamma_NL3
In this study	PP845692		503	partial, RdRp		2020-11-02	China	Shanghai	Shanghai	Cloacal swabs					Anseriformes	Anatidae	Anas	Anas crecca	yes	Coronaviridae	Orthocoronavirinae	Gammacoronavirus	Igacovirus	Gammacoronavirus_Anatiscopes(NL3)	DuCoV_NL3	Gamma_NL3
In this study	PP845716		503	partial, RdRp		2020-11-02	China	Shanghai	Shanghai	Cloacal swabs					Anseriformes	Anatidae	Anas	Anas crecca	yes	Coronaviridae	Orthocoronavirinae	Gammacoronavirus	Igacovirus	Gammacoronavirus_Anatiscopes(NL3)	DuCoV_NL3	Gamma_NL3
In this study	PP845667		503	partial, RdRp		2020-11-02	China	Shanghai	Shanghai	Cloacal swabs					Anseriformes	Anatidae	Anas	Anas crecca	yes	Coronaviridae	Orthocoronavirinae	Gammacoronavirus	Igacovirus	Gammacoronavirus_Anatiscopes(NL3)	DuCoV_NL3	Gamma_NL3
In this study	PP845554		503	partial, RdRp		2020-11-02	China	Shanghai	Shanghai	Cloacal swabs					Anseriformes	Anatidae	Anas	Anas platyrhynchos	yes	Coronaviridae	Orthocoronavirinae	Gammacoronavirus	Igacovirus	Gammacoronavirus_Anatiscopes(NL3)	DuCoV_NL3	Gamma_NL3
In this study	PP845712		503	partial, RdRp		2020-11-04	China	Shanghai	Shanghai	Cloacal swabs					Anseriformes	Anatidae	Anas	Anas crecca	yes	Coronaviridae	Orthocoronavirinae	Gammacoronavirus	Igacovirus	Gammacoronavirus_Anatiscopes(NL3)	DuCoV_NL3	Gamma_NL3
In this study	PP845555		503	partial, RdRp		2020-11-04	China	Shanghai	Shanghai	Cloacal swabs					Anseriformes	Anatidae	Anas	Anas zonorhyncha	yes	Coronaviridae	Orthocoronavirinae	Gammacoronavirus	Igacovirus	Gammacoronavirus_Anatiscopes(NL3)	DuCoV_NL3	Gamma_NL3
In this study	PP845552		503	partial, RdRp		2020-11-04	China	Shanghai	Shanghai	Cloacal swabs					Anseriformes	Anatidae	Anas	Anas zonorhyncha	yes	Coronaviridae	Orthocoronavirinae	Gammacoronavirus	Igacovirus	Gammacoronavirus_Anatiscopes(NL3)	DuCoV_NL3	Gamma_NL3
In this study	PP845553		503	partial, RdRp		2020-11-04	China	Shanghai	Shanghai	Cloacal swabs					Anseriformes	Anatidae	Anas	Anas zonorhyncha	yes	Coronaviridae	Orthocoronavirinae	Gammacoronavirus	Igacovirus	Gammacoronavirus_Anatiscopes(NL3)	DuCoV_NL3	Gamma_NL3
In this study	PP845562		503	partial, RdRp		2020-11-04	China	Shanghai	Shanghai	Cloacal swabs					Anseriformes	Anatidae	Anas	Anas platyrhynchos	yes	Coronaviridae	Orthocoronavirinae	Gammacoronavirus	Igacovirus	Gammacoronavirus_Anatiscopes(NL3)	DuCoV_NL3	Gamma_NL3
In this study	PP845556		503	partial, RdRp		2020-11-19	China	Shanghai	Shanghai	Cloacal swabs					Anseriformes	Anatidae	Anas	Anas zonorhyncha	yes	Coronaviridae	Orthocoronavirinae	Gammacoronavirus	Igacovirus	Gammacoronavirus_Anatiscopes(NL3)	DuCoV_NL3	Gamma_NL3
In this study	PP845602		503	partial, RdRp		2020-11-19	China	Shanghai	Shanghai	Cloacal swabs					Anseriformes	Anatidae	Anas	Anas zonorhyncha	yes	Coronaviridae	Orthocoronavirinae	Gammacoronavirus	Igacovirus	Gammacoronavirus_Anatiscopes(NL3)	DuCoV_NL3	Gamma_NL3
In this study	PP845650		503	partial, RdRp		2020-11-19	China	Shanghai	Shanghai	Cloacal swabs					Anseriformes	Anatidae	Anas	Anas zonorhyncha	yes	Coronaviridae	Orthocoronavirinae	Gammacoronavirus	Igacovirus	Gammacoronavirus_Anatiscopes(NL3)	DuCoV_NL3	Gamma_NL3
In this study	PP845570		503	partial, RdRp		2020-11-19	China	Shanghai	Shanghai	Cloacal swabs					Anseriformes	Anatidae	Anas	Anas zonorhyncha	yes	Coronaviridae	Orthocoronavirinae	Gammacoronavirus	Igacovirus	Gammacoronavirus_Anatiscopes(NL3)	DuCoV_NL3	Gamma_NL3
In this study	PP845797		500	partial, RdRp		2020-11-19	China	Shanghai	Shanghai	Cloacal swabs					Anseriformes	Anatidae	Anas	Anas zonorhyncha	yes	Coronaviridae	Orthocoronavirinae	Deltacoronavirus	Andecovirus	Deltacoronavirus_anatis(NL1)	DuCoV_NL1	Delta_NL1
In this study	PP845504		503	partial, RdRp		2020-11-19	China	Shanghai	Shanghai	Cloacal swabs					Anseriformes	Anatidae	Anas	Anas zonorhyncha	yes	Coronaviridae	Orthocoronavirinae	Gammacoronavirus	Igacovirus	Gammacoronavirus_Anatiscopes(NL3)	DuCoV_NL3	Gamma_NL3
In this study	PP845387			complete genome		2020-11-19	China	Shanghai	Shanghai	Cloacal swabs					Anseriformes	Anatidae	Anas	Anas zonorhyncha	yes	Coronaviridae	Orthocoronavirinae	Gammacoronavirus	Igacovirus	Gammacoronavirus_Anatiscopes(NL3)	DuCoV_NL3	Gamma_NL3
In this study	PP845603		503	partial, RdRp		2020-11-19	China	Shanghai	Shanghai	Cloacal swabs					Anseriformes	Anatidae	Anas	Anas zonorhyncha	yes	Coronaviridae	Orthocoronavirinae	Gammacoronavirus	Igacovirus	Gammacoronavirus_Anatiscopes(NL3)	DuCoV_NL3	Gamma_NL3
In this study	PP845581		503	partial, RdRp		2020-11-19	China	Shanghai	Shanghai	Cloacal swabs					Anseriformes	Anatidae	Anas	Anas zonorhyncha	yes	Coronaviridae	Orthocoronavirinae	Gammacoronavirus	Igacovirus	Gammacoronavirus_Anatiscopes(NL3)	DuCoV_NL3	Gamma_NL3
In this study	PP845433			complete genome		2020-11-19	China	Shanghai	Shanghai	Cloacal swabs					Anseriformes	Anatidae	Anas	Anas platyrhynchos	yes	Coronaviridae	Orthocoronavirinae	Gammacoronavirus	Igacovirus	Gammacoronavirus_Anatiscopes(NL3)	DuCoV_NL3	Gamma_NL3
In this study	PP845571		503	partial, RdRp		2020-11-19	China	Shanghai	Shanghai	Cloacal swabs					Anseriformes	Anatidae	Anas	Anas platyrhynchos	yes	Coronaviridae	Orthocoronavirinae	Gammacoronavirus	Igacovirus	Gammacoronavirus_Anatiscopes(NL3)	DuCoV_NL3	Gamma_NL3
In this study	PP845557		503	partial, RdRp		2020-11-29	China	Shanghai	Shanghai	Cloacal swabs					Anseriformes	Anatidae	Anas	Anas platyrhynchos	yes	Coronaviridae	Orthocoronavirinae	Gammacoronavirus	Igacovirus	Gammacoronavirus_Anatiscopes(NL3)	DuCoV_NL3	Gamma_NL3
In this study	PP845517		503	partial, RdRp		2020-11-30	China	Shanghai	Shanghai	Cloacal swabs					Anseriformes	Anatidae	Anas	Anas platyrhynchos	yes	Coronaviridae	Orthocoronavirinae	Gammacoronavirus	Igacovirus	Gammacoronavirus_Anatiscopes(NL3)	DuCoV_NL3	Gamma_NL3
In this study	PP845582		503	partial, RdRp		2020-12-02	China	Shanghai	Shanghai	Cloacal swabs					Anseriformes	Anatidae	Anas	Anas zonorhyncha	yes	Coronaviridae	Orthocoronavirinae	Gammacoronavirus	Igacovirus	Gammacoronavirus_Anatiscopes(NL3)	DuCoV_NL3	Gamma_NL3
In this study	PP845536		503	partial, RdRp		2020-12-02	China	Shanghai	Shanghai	Cloacal swabs					Anseriformes	Anatidae	Anas	Anas zonorhyncha	yes	Coronaviridae	Orthocoronavirinae	Gammacoronavirus	Igacovirus	Gammacoronavirus_Anatiscopes(NL3)	DuCoV_NL3	Gamma_NL3
In this study	PP845649		503	partial, RdRp		2020-12-02	China	Shanghai	Shanghai	Cloacal swabs					Anseriformes	Anatidae	Anas	Anas zonorhyncha	yes	Coronaviridae	Orthocoronavirinae	Gammacoronavirus	Igacovirus	Gammacoronavirus_Anatiscopes(NL3)	DuCoV_NL3	Gamma_NL3
In this study	PP845583		503	partial, RdRp		2020-12-02	China	Shanghai	Shanghai	Cloacal swabs					Anseriformes	Anatidae	Anas	Anas platyrhynchos	yes	Coronaviridae	Orthocoronavirinae	Gammacoronavirus	Igacovirus	Gammacoronavirus_Anatiscopes(NL3)	DuCoV_NL3	Gamma_NL3
In this study	PP845572		503	partial, RdRp		2020-12-02	China	Shanghai	Shanghai	Cloacal swabs					Anseriformes	Anatidae	Anas	Anas platyrhynchos	yes	Coronaviridae	Orthocoronavirinae	Gammacoronavirus	Igacovirus	Gammacoronavirus_Anatiscopes(NL3)	DuCoV_NL3	Gamma_NL3
In this study	PP845574		503	partial, RdRp		2020-12-02	China	Shanghai	Shanghai	Cloacal swabs					Anseriformes	Anatidae	Anas	Anas platyrhynchos	yes	Coronaviridae	Orthocoronavirinae	Gammacoronavirus	Igacovirus	Gammacoronavirus_Anatiscopes(NL3)	DuCoV_NL3	Gamma_NL3
In this study	PP845585		503	partial, RdRp		2020-12-02	China	Shanghai	Shanghai	Cloacal swabs					Anseriformes	Anatidae	Anas	Anas platyrhynchos	yes	Coronaviridae	Orthocoronavirinae	Gammacoronavirus	Igacovirus	Gammacoronavirus_Anatiscopes(NL3)	DuCoV_NL3	Gamma_NL3
In this study	PP845537		503	partial, RdRp		2020-12-04	China	Shanghai	Shanghai	Cloacal swabs					Anseriformes	Anatidae	Mareca	Mareca strepera	yes	Coronaviridae	Orthocoronavirinae	Gammacoronavirus	Igacovirus	Gammacoronavirus_Anatiscopes(NL3)	DuCoV_NL3	Gamma_NL3
In this study	PP845538		503	partial, RdRp		2020-12-04	China	Shanghai	Shanghai	Cloacal swabs					Anseriformes	Anatidae	Mareca	Mareca penelope	yes	Coronaviridae	Orthocoronavirinae	Gammacoronavirus	Igacovirus	Gammacoronavirus_Anatiscopes(NL3)	DuCoV_NL3	Gamma_NL3
In this study	PP845646		503	partial, RdRp		2020-12-04	China	Shanghai	Shanghai	Cloacal swabs					Anseriformes	Anatidae	Mareca	Mareca strepera	yes	Coronaviridae	Orthocoronavirinae	Gammacoronavirus	Igacovirus	Gammacoronavirus_Anatiscopes(NL3)	DuCoV_NL3	Gamma_NL3
In this study	PP845514		503	partial, RdRp		2020-12-04	China	Shanghai	Shanghai	Cloacal swabs					Anseriformes	Anatidae	Anas	Anas zonorhyncha	yes	Coronaviridae	Orthocoronavirinae	Gammacoronavirus	Igacovirus	Gammacoronavirus_Anatiscopes(NL3)	DuCoV_NL3	Gamma_NL3
In this study	PP845588		503	partial, RdRp		2020-12-04	China	Shanghai	Shanghai	Cloacal swabs					Anseriformes	Anatidae	Anas	Anas platyrhynchos	yes	Coronaviridae	Orthocoronavirinae	Gammacoronavirus	Igacovirus	Gammacoronavirus_Anatiscopes(NL3)	DuCoV_NL3	Gamma_NL3
In this study	PP845586		503	partial, RdRp		2020-12-04	China	Shanghai	Shanghai	Cloacal swabs					Anseriformes	Anatidae	Anas	Anas platyrhynchos	yes	Coronaviridae	Orthocoronavirinae	Gammacoronavirus	Igacovirus	Gammacoronavirus_Anatiscopes(NL3)	DuCoV_NL3	Gamma_NL3
In this study	PP845584		503	partial, RdRp		2020-12-04	China	Shanghai	Shanghai	Cloacal swabs					Anseriformes	Anatidae	Anas	Anas platyrhynchos	yes	Coronaviridae	Orthocoronavirinae	Gammacoronavirus	Igacovirus	Gammacoronavirus_Anatiscopes(NL3)	DuCoV_NL3	Gamma_NL3
In this study	PP845573		503	partial, RdRp		2020-12-04	China	Shanghai	Shanghai	Cloacal swabs					Anseriformes	Anatidae	Anas	Anas platyrhynchos	yes	Coronaviridae	Orthocoronavirinae	Gammacoronavirus	Igacovirus	Gammacoronavirus_Anatiscopes(NL3)	DuCoV_NL3	Gamma_NL3
In this study	PP845587		503	partial, RdRp		2020-12-04	China	Shanghai	Shanghai	Cloacal swabs					Anseriformes	Anatidae	Anas	Anas platyrhynchos	yes	Coronaviridae	Orthocoronavirinae	Gammacoronavirus	Igacovirus	Gammacoronavirus_Anatiscopes(NL3)	DuCoV_NL3	Gamma_NL3
In this study	PP845722		503	partial, RdRp		2020-12-04	China	Shanghai	Shanghai	Cloacal swabs					Anseriformes	Anatidae	Anas	Anas clypeata		Coronaviridae	Orthocoronavirinae	Gammacoronavirus	Igacovirus	Gammacoronavirus_Anatiscopes(NL3)	DuCoV_NL3	Gamma_NL3
In this study	PP845651		503	partial, RdRp		2020-12-04	China	Shanghai	Shanghai	Cloacal swabs					Anseriformes	Anatidae	Anas	Anas zonorhyncha	yes	Coronaviridae	Orthocoronavirinae	Gammacoronavirus	Igacovirus	Gammacoronavirus_Anatiscopes(NL3)	DuCoV_NL3	Gamma_NL3
In this study	PP845575		503	partial, RdRp		2020-12-04	China	Shanghai	Shanghai	Cloacal swabs					Anseriformes	Anatidae	Anas	Anas zonorhyncha	yes	Coronaviridae	Orthocoronavirinae	Gammacoronavirus	Igacovirus	Gammacoronavirus_Anatiscopes(NL3)	DuCoV_NL3	Gamma_NL3
In this study	PP845698		503	partial, RdRp		2021-04-14	China	Shanghai	Shanghai	Cloacal swabs					Charadriiformes	Scolopacidae	Calidris	Calidris alpina	yes	Coronaviridae	Orthocoronavirinae	Gammacoronavirus	Igacovirus	Gammacoronavirus_Anatiscopes(NL3)	DuCoV_NL3	Gamma_NL3
In this study	PP845781		500	partial, RdRp		2021-04-21	China	Shanghai	Shanghai	Cloacal swabs					Charadriiformes	Charadriidae	Pluvialis	Pluvialis squatarola	yes	Coronaviridae	Orthocoronavirinae	Deltacoronavirus	Buldecovirus	Deltacoronavirus_Sandpipers(NL2)	SandCoV_NL2	Delta_NL2
In this study	PP845787		500	partial, RdRp		2021-07-28	China	Shanghai	Shanghai	Cloacal swabs					Pelecaniformes	Ardeidae	Egretta	Egretta garzetta	yes	Coronaviridae	Orthocoronavirinae	Deltacoronavirus	Herdecovirus	Deltacoronavirus_nycticoracis	NHCoV_HKU19	Delta_HKU19
In this study	PP845721		503	partial, RdRp		2021-09-02	China	Shanghai	Shanghai	Cloacal swabs					Charadriiformes	Scolopacidae	Tringa	Tringa totanus	yes	Coronaviridae	Orthocoronavirinae	Gammacoronavirus	Igacovirus	Gammacoronavirus_Anatiscopes(NL3)	DuCoV_NL3	Gamma_NL3
In this study	PP845766		500	partial, RdRp		2021-08-27	China	Shanghai	Shanghai	Cloacal swabs					Charadriiformes	Scolopacidae	Arenaria	Arenaria interpres	yes	Coronaviridae	Orthocoronavirinae	Deltacoronavirus	Buldecovirus	Deltacoronavirus_Sandpipers(NL2)	SandCoV_NL2	Delta_NL2
In this study	PP845756		500	partial, RdRp		2021-09-03	China	Shanghai	Shanghai	Cloacal swabs					Charadriiformes	Scolopacidae	Calidris	Calidris falcinellus	yes	Coronaviridae	Orthocoronavirinae	Deltacoronavirus	Buldecovirus	Deltacoronavirus_Sandpipers(NL2)	SandCoV_NL2	Delta_NL2
In this study	PP845757		500	partial, RdRp		2021-09-03	China	Shanghai	Shanghai	Cloacal swabs					Charadriiformes	Scolopacidae	Calidris	Calidris falcinellus	yes	Coronaviridae	Orthocoronavirinae	Deltacoronavirus	Buldecovirus	Deltacoronavirus_Sandpipers(NL2)	SandCoV_NL2	Delta_NL2
In this study	PP845759		500	partial, RdRp		2021-09-06	China	Shanghai	Shanghai	Cloacal swabs					Charadriiformes	Scolopacidae	Calidris	Calidris tenuirostris	yes	Coronaviridae	Orthocoronavirinae	Deltacoronavirus	Buldecovirus	Deltacoronavirus_Sandpipers(NL2)	SandCoV_NL2	Delta_NL2
In this study	PP845760		500	partial, RdRp		2021-09-06	China	Shanghai	Shanghai	Cloacal swabs					Charadriiformes	Scolopacidae	Calidris	Calidris tenuirostris	yes	Coronaviridae	Orthocoronavirinae	Deltacoronavirus	Buldecovirus	Deltacoronavirus_Sandpipers(NL2)	SandCoV_NL2	Delta_NL2
In this study	PP845758		500	partial, RdRp		2021-09-06	China	Shanghai	Shanghai	Cloacal swabs					Charadriiformes	Scolopacidae	Calidris	Calidris tenuirostris	yes	Coronaviridae	Orthocoronavirinae	Deltacoronavirus	Buldecovirus	Deltacoronavirus_Sandpipers(NL2)	SandCoV_NL2	Delta_NL2
Public database	JQ065048		26227	complete genome	yes	2008	China	Hong Kong		tracheal, rectal, and cloacal swabs and nasopharyngeal aspirates	Wigeon coronavirus HKU20	HKU20-9243	HKU20-9243	wigeon	Anseriformes	Anatidae	Mareca	Mareca penelope	yes	Coronaviridae	Orthocoronavirinae	Deltacoronavirus	Andecovirus	Deltacoronavirus_marecae	WiCoV_HKU20	Delta_HKU20
Public database	NC_016995		26227	complete genome		2008	China	Hong Kong		tracheal, rectal, and cloacal swabs and nasopharyngeal aspirates	Wigeon coronavirus HKU20	HKU20-9243	HKU20-9243	wigeon	Anseriformes	Anatidae	Mareca	Mareca penelope	yes	Coronaviridae	Orthocoronavirinae	Deltacoronavirus	Andecovirus	Deltacoronavirus_marecae	WiCoV_HKU20	Delta_HKU20
Public database	JN788796		357	partial, RdRp		2009-11-27	China	Hong Kong	Mai Po Marshes	Cloacal swabs	Avian coronavirus	J0590/Anas clypeata/091127	J0590/Anas clypeata/091127	Anas clypeata	Anseriformes	Anatidae	Anas	Anas clypeata		Coronaviridae	Orthocoronavirinae	Deltacoronavirus	Andecovirus	Deltacoronavirus_marecae	WiCoV_HKU20	Delta_HKU20
Public database	JN788867		357	partial, RdRp		2009-12-23	China	Hong Kong	Mai Po Marshes	Cloacal swabs	Avian coronavirus	K537/Anas clypeata/091223	K537/Anas clypeata/091223	Anas clypeata	Anseriformes	Anatidae	Anas	Anas clypeata		Coronaviridae	Orthocoronavirinae	Deltacoronavirus	Andecovirus	Deltacoronavirus_marecae	WiCoV_HKU20	Delta_HKU20
Public database	MG764116		557	partial, RdRp		2016-12-21	Australia	Victoria		Oropharyngeal and cloacal swabs	Avian coronavirus	DeltaCoV-G0001-2016/12/21-LC/VIC	DeltaCoV-G0001-2016/12/21-LC/VIC	Anas superciliosa (Pacific black duck)	Anseriformes	Anatidae	Anas	Anas superciliosa		Coronaviridae	Orthocoronavirinae	Deltacoronavirus	Andecovirus	Deltacoronavirus_anatis(NL1)	DuCoV_NL1	Delta_NL1
Public database	MH013331		2076	partial, RdRp		2016-12-01	Australia			feces	Deltacoronavirus sp.			Anas superciliosa	Anseriformes	Anatidae	Anas	Anas superciliosa		Coronaviridae	Orthocoronavirinae	Deltacoronavirus	Andecovirus	Deltacoronavirus_anatis(NL1)	DuCoV_NL1	Delta_NL1
Public database	JN788837		357	partial, RdRp		2009-12-30	China	Hong Kong	Mai Po Marshes	Cloacal swabs	Avian coronavirus	J1420/Anas crecca/091230	J1420/Anas crecca/091230	Anas crecca	Anseriformes	Anatidae	Anas	Anas crecca	yes	Coronaviridae	Orthocoronavirinae	Deltacoronavirus	Andecovirus	Deltacoronavirus_anatis(NL1)	DuCoV_NL1	Delta_NL1
Public database	JN788788		357	partial, RdRp		2009-11-27	China	Hong Kong	Mai Po Marshes	Cloacal swabs	Avian coronavirus	J0569/Platalea minor/091127	J0569/Platalea minor/091127	Platalea minor	Pelecaniformes	Threskiornithidae	Platalea	Platalea minor	yes	Coronaviridae	Orthocoronavirinae	Deltacoronavirus	Herdecovirus	Unclassified Herdecovirus	Herdecovirus sp.
Public database	JN788886		357	partial, RdRp		2008-11-07	Cambodia			cloacal swab	Avian coronavirus	KH08-1475/Ardeola bacchus/081107	KH08-1475/Ardeola bacchus/081107	Ardeola bacchus	Pelecaniformes	Ardeidae	Ardeola	Ardeola bacchus	yes	Coronaviridae	Orthocoronavirinae	Deltacoronavirus	Herdecovirus	Deltacoronavirus_nycticoracis	NHCoV_HKU19	Delta_HKU19
Public database	JN788888		357	partial, RdRp		2008-11-19	Cambodia			cloacal swab	Avian coronavirus	KH08-1544/Ardeola bacchus/081119	KH08-1544/Ardeola bacchus/081119	Ardeola bacchus	Pelecaniformes	Ardeidae	Ardeola	Ardeola bacchus	yes	Coronaviridae	Orthocoronavirinae	Deltacoronavirus	Herdecovirus	Deltacoronavirus_nycticoracis	NHCoV_HKU19	Delta_HKU19
Public database	JN788887		357	partial, RdRp		2008-11-07	Cambodia			cloacal swab	Avian coronavirus	KH08-1476/Ardeola bacchus/081107	KH08-1476/Ardeola bacchus/081107	Ardeola bacchus	Pelecaniformes	Ardeidae	Ardeola	Ardeola bacchus	yes	Coronaviridae	Orthocoronavirinae	Deltacoronavirus	Herdecovirus	Deltacoronavirus_nycticoracis	NHCoV_HKU19	Delta_HKU19
Public database	JN788882		357	partial, RdRp		2008-10-09	Cambodia			cloacal swab	Avian coronavirus	KH08-1322/Ardeola bacchus/081009	KH08-1322/Ardeola bacchus/081009	Ardeola bacchus	Pelecaniformes	Ardeidae	Ardeola	Ardeola bacchus	yes	Coronaviridae	Orthocoronavirinae	Deltacoronavirus	Herdecovirus	Deltacoronavirus_nycticoracis	NHCoV_HKU19	Delta_HKU19
Public database	JN788884		357	partial, RdRp		2008-11-06	Cambodia			cloacal swab	Avian coronavirus	KH08-1450/Ardeola bacchus/081106	KH08-1450/Ardeola bacchus/081106	Ardeola bacchus	Pelecaniformes	Ardeidae	Ardeola	Ardeola bacchus	yes	Coronaviridae	Orthocoronavirinae	Deltacoronavirus	Herdecovirus	Deltacoronavirus_nycticoracis	NHCoV_HKU19	Delta_HKU19
Public database	JN788880		357	partial, RdRp		2008-10-09	Cambodia			cloacal swab	Avian coronavirus	KH08-1320/Ardeola bacchus/081009	KH08-1320/Ardeola bacchus/081009	Ardeola bacchus	Pelecaniformes	Ardeidae	Ardeola	Ardeola bacchus	yes	Coronaviridae	Orthocoronavirinae	Deltacoronavirus	Herdecovirus	Deltacoronavirus_nycticoracis	NHCoV_HKU19	Delta_HKU19
Public database	JN788881		357	partial, RdRp		2008-10-09	Cambodia			cloacal swab	Avian coronavirus	KH08-1321/Ardeola bacchus/081009	KH08-1321/Ardeola bacchus/081009	Ardeola bacchus	Pelecaniformes	Ardeidae	Ardeola	Ardeola bacchus	yes	Coronaviridae	Orthocoronavirinae	Deltacoronavirus	Herdecovirus	Deltacoronavirus_nycticoracis	NHCoV_HKU19	Delta_HKU19
Public database	JN788883		357	partial, RdRp		2008-10-09	Cambodia			cloacal swab	Avian coronavirus	KH08-1325/Ardeola bacchus/081009	KH08-1325/Ardeola bacchus/081009	Ardeola bacchus	Pelecaniformes	Ardeidae	Ardeola	Ardeola bacchus	yes	Coronaviridae	Orthocoronavirinae	Deltacoronavirus	Herdecovirus	Deltacoronavirus_nycticoracis	NHCoV_HKU19	Delta_HKU19
Public database	JN788885		357	partial, RdRp		2008-11-07	Cambodia			cloacal swab	Avian coronavirus	KH08-1474/Ardeola bacchus/081107	KH08-1474/Ardeola bacchus/081107	Ardeola bacchus	Pelecaniformes	Ardeidae	Ardeola	Ardeola bacchus	yes	Coronaviridae	Orthocoronavirinae	Deltacoronavirus	Herdecovirus	Deltacoronavirus_nycticoracis	NHCoV_HKU19	Delta_HKU19
Public database	OP355477		379	partial, RdRp		2020	Viet Nam	Ca Mau		cloacal swabs, droppings and internal organ fragments	Deltacoronavirus sp.	AvCoV/black-crowned night-heron/Vietnam/M2349/2020	AvCoV/black-crowned night-heron/Vietnam/M2349/2020	black-crowned night-heron	Pelecaniformes	Ardeidae	Nycticorax	Nycticorax nycticorax	yes	Coronaviridae	Orthocoronavirinae	Deltacoronavirus	Herdecovirus	Deltacoronavirus_nycticoracis	NHCoV_HKU19	Delta_HKU19
Public database	OP355481		544	partial, RdRp		2020	Viet Nam	Ca Mau		cloacal swabs, droppings and internal organ fragments	Deltacoronavirus sp.	AvCoV/black-crowned night-heron/Vietnam/M23491/2020	AvCoV/black-crowned night-heron/Vietnam/M23491/2020	black-crowned night-heron	Pelecaniformes	Ardeidae	Nycticorax	Nycticorax nycticorax	yes	Coronaviridae	Orthocoronavirinae	Deltacoronavirus	Herdecovirus	Deltacoronavirus_nycticoracis	NHCoV_HKU19	Delta_HKU19
Public database	OP355473		379	partial, RdRp		2020	Viet Nam	Ca Mau		cloacal swabs, droppings and internal organ fragments	Deltacoronavirus sp.	AvCoV/black-crowned night-heron /Vietnam/M2344/2020	AvCoV/black-crowned night-heron /Vietnam/M2344/2020	black-crowned night-heron	Pelecaniformes	Ardeidae	Nycticorax	Nycticorax nycticorax	yes	Coronaviridae	Orthocoronavirinae	Deltacoronavirus	Herdecovirus	Deltacoronavirus_nycticoracis	NHCoV_HKU19	Delta_HKU19
Public database	JQ065047		26077	complete genome	yes	2007	China	Hong Kong		tracheal, rectal, and cloacal swabs and nasopharyngeal aspirates	Night heron coronavirus HKU19	HKU19-6918	HKU19-6918	night-heron	Pelecaniformes	Ardeidae	Gorsachius	Gorsachius magnificus		Coronaviridae	Orthocoronavirinae	Deltacoronavirus	Herdecovirus	Deltacoronavirus_nycticoracis	NHCoV_HKU19	Delta_HKU19
Public database	NC_016994		26077	complete genome		2007	China	Hong Kong		tracheal, rectal, and cloacal swabs and nasopharyngeal aspirates	Night heron coronavirus HKU19	HKU19-6918	HKU19-6918	night-heron	Pelecaniformes	Ardeidae	Gorsachius	Gorsachius magnificus		Coronaviridae	Orthocoronavirinae	Deltacoronavirus	Herdecovirus	Deltacoronavirus_nycticoracis	NHCoV_HKU19	Delta_HKU19
Public database	OP355479		241	partial, RdRp		2020	Viet Nam	Ca Mau		cloacal swabs, droppings and internal organ fragments	Deltacoronavirus sp.	AvCoV/black-crowned night-heron /Vietnam/M23414/2020	AvCoV/black-crowned night-heron /Vietnam/M23414/2020	black-crowned night-heron	Pelecaniformes	Ardeidae	Nycticorax	Nycticorax nycticorax	yes	Coronaviridae	Orthocoronavirinae	Deltacoronavirus	Herdecovirus	Deltacoronavirus_nycticoracis	NHCoV_HKU19	Delta_HKU19
Public database	OP355483		542	partial, RdRp		2020	Viet Nam	Ca Mau		cloacal swabs, droppings and internal organ fragments	Deltacoronavirus sp.	AvCoV/black-crowned night-heron /Vietnam/M23452/2020	AvCoV/black-crowned night-heron /Vietnam/M23452/2020	black-crowned night-heron	Pelecaniformes	Ardeidae	Nycticorax	Nycticorax nycticorax	yes	Coronaviridae	Orthocoronavirinae	Deltacoronavirus	Herdecovirus	Deltacoronavirus_nycticoracis	NHCoV_HKU19	Delta_HKU19
Public database	OP355471		379	partial, RdRp		2020	Viet Nam	Ca Mau		cloacal swabs, droppings and internal organ fragments	Deltacoronavirus sp.	AvCoV/black-crowned night-heron /Vietnam/M23411/2020	AvCoV/black-crowned night-heron /Vietnam/M23411/2020	black-crowned night-heron	Pelecaniformes	Ardeidae	Nycticorax	Nycticorax nycticorax	yes	Coronaviridae	Orthocoronavirinae	Deltacoronavirus	Herdecovirus	Deltacoronavirus_nycticoracis	NHCoV_HKU19	Delta_HKU19
Public database	OP355472		379	partial, RdRp		2020	Viet Nam	Ca Mau		cloacal swabs, droppings and internal organ fragments	Deltacoronavirus sp.	AvCoV/black-crowned night-heron /Vietnam/M2343/2020	AvCoV/black-crowned night-heron /Vietnam/M2343/2020	black-crowned night-heron	Pelecaniformes	Ardeidae	Nycticorax	Nycticorax nycticorax	yes	Coronaviridae	Orthocoronavirinae	Deltacoronavirus	Herdecovirus	Deltacoronavirus_nycticoracis	NHCoV_HKU19	Delta_HKU19
Public database	OP355474		379	partial, RdRp		2020	Viet Nam	Ca Mau		cloacal swabs, droppings and internal organ fragments	Deltacoronavirus sp.	AvCoV/black-crowned night-heron /Vietnam/M2345/2020	AvCoV/black-crowned night-heron /Vietnam/M2345/2020	black-crowned night-heron	Pelecaniformes	Ardeidae	Nycticorax	Nycticorax nycticorax	yes	Coronaviridae	Orthocoronavirinae	Deltacoronavirus	Herdecovirus	Deltacoronavirus_nycticoracis	NHCoV_HKU19	Delta_HKU19
Public database	OP355480		544	partial, RdRp		2020	Viet Nam	Ca Mau		cloacal swabs, droppings and internal organ fragments	Deltacoronavirus sp.	AvCoV/black-crowned night-heron /Vietnam/M2342/2020	AvCoV/black-crowned night-heron /Vietnam/M2342/2020	black-crowned night-heron	Pelecaniformes	Ardeidae	Nycticorax	Nycticorax nycticorax	yes	Coronaviridae	Orthocoronavirinae	Deltacoronavirus	Herdecovirus	Deltacoronavirus_nycticoracis	NHCoV_HKU19	Delta_HKU19
Public database	JN788841		357	partial, RdRp		2009-12-30	China	Hong Kong	Mai Po Marshes	Cloacal swabs	Avian coronavirus	J1463/Ardea cinerea/091230	J1463/Ardea cinerea/091230	Ardea cinerea	Pelecaniformes	Ardeidae	Ardea	Ardea cinerea	yes	Coronaviridae	Orthocoronavirinae	Deltacoronavirus	Herdecovirus	Deltacoronavirus_nycticoracis	NHCoV_HKU19	Delta_HKU19
Public database	JN788865		357	partial, RdRp		2009-12-23	China	Hong Kong	Mai Po Marshes	Cloacal swabs	Avian coronavirus	K513/Ardea cinerea/091223	K513/Ardea cinerea/091223	Ardea cinerea	Pelecaniformes	Ardeidae	Ardea	Ardea cinerea	yes	Coronaviridae	Orthocoronavirinae	Deltacoronavirus	Herdecovirus	Deltacoronavirus_nycticoracis	NHCoV_HKU19	Delta_HKU19
Public database	JN788874		357	partial, RdRp		2009-12-23	China	Hong Kong	Mai Po Marshes	Cloacal swabs	Avian coronavirus	K581/Ardea cinerea/091223	K581/Ardea cinerea/091223	Ardea cinerea	Pelecaniformes	Ardeidae	Ardea	Ardea cinerea	yes	Coronaviridae	Orthocoronavirinae	Deltacoronavirus	Herdecovirus	Deltacoronavirus_nycticoracis	NHCoV_HKU19	Delta_HKU19
Public database	JN788875		357	partial, RdRp		2009-12-23	China	Hong Kong	Mai Po Marshes	Cloacal swabs	Avian coronavirus	K582/Ardea cinerea/091223	K582/Ardea cinerea/091223	Ardea cinerea	Pelecaniformes	Ardeidae	Ardea	Ardea cinerea	yes	Coronaviridae	Orthocoronavirinae	Deltacoronavirus	Herdecovirus	Deltacoronavirus_nycticoracis	NHCoV_HKU19	Delta_HKU19
Public database	KU321643		225	partial, RdRp		2013-06-25	Brazil	Ibirapuera Park, SP		oral/cloacal swab	Anser cygnoides coronavirus	DPV_5	DPV_5	Anser cygnoides	Anseriformes	Anatidae	Anser	Anser cygnoides		Coronaviridae	Orthocoronavirinae	Deltacoronavirus	Herdecovirus	Deltacoronavirus_nycticoracis	NHCoV_HKU19	Delta_HKU19
Public database	KU321644		225	partial, RdRp		2013-06-25	Brazil	Ibirapuera Park, SP		oral/cloacal swab	Anser cygnoides coronavirus	DPV_10	DPV_10	Anser cygnoides	Anseriformes	Anatidae	Anser	Anser cygnoides		Coronaviridae	Orthocoronavirinae	Deltacoronavirus	Herdecovirus	Deltacoronavirus_nycticoracis	NHCoV_HKU19	Delta_HKU19
Public database	OR344774		411	partial, RdRp		2022	Brazil	Sao Pedro and Sao Paulo Archipelago		feces	Deltacoronavirus sp.	A220778	A220778	Sula leucogaster	Suliformes	Sulidae	Sula	Sula leucogaster		Coronaviridae	Orthocoronavirinae	Deltacoronavirus	Herdecovirus	Deltacoronavirus_nycticoracis	NHCoV_HKU19	Delta_HKU19
Public database	OR344775		411	partial, RdRp		2022	Brazil	Sao Pedro and Sao Paulo Archipelago		feces	Deltacoronavirus sp.	A220801	A220801	Sula leucogaster	Suliformes	Sulidae	Sula	Sula leucogaster		Coronaviridae	Orthocoronavirinae	Deltacoronavirus	Herdecovirus	Deltacoronavirus_nycticoracis	NHCoV_HKU19	Delta_HKU19
Public database	OR344776		411	partial, RdRp		2022	Brazil	Sao Pedro and Sao Paulo Archipelago		feces	Deltacoronavirus sp.	A220810	A220810	Sula leucogaster	Suliformes	Sulidae	Sula	Sula leucogaster		Coronaviridae	Orthocoronavirinae	Deltacoronavirus	Herdecovirus	Deltacoronavirus_nycticoracis	NHCoV_HKU19	Delta_HKU19
Public database	OP355482		542	partial, RdRp		2020	Viet Nam	Ca Mau		cloacal swabs, droppings and internal organ fragments	Deltacoronavirus sp.	AvCoV/little egret /Vietnam/M23511/2020	AvCoV/little egret /Vietnam/M23511/2020	little egret	Pelecaniformes	Ardeidae	Egretta	Egretta garzetta	yes	Coronaviridae	Orthocoronavirinae	Deltacoronavirus	Herdecovirus	Deltacoronavirus_nycticoracis	NHCoV_HKU19	Delta_HKU19
Public database	MG764117		557	partial, RdRp		2016-04-30	Australia	Northern Territory		Oropharyngeal and cloacal swabs	Avian coronavirus	CoV-9518-2016/4/30-HD/NT	CoV-9518-2016/4/30-HD/NT	Egretta picata (pied heron)	Pelecaniformes	Ardeidae	Egretta	Egretta picata	yes	Coronaviridae	Orthocoronavirinae	Deltacoronavirus	Herdecovirus	Deltacoronavirus_nycticoracis	NHCoV_HKU19	Delta_HKU19
Public database	MG764118		392	partial, RdRp		2016-05-01	Australia	Northern Territory		Oropharyngeal and cloacal swabs	Avian coronavirus	CoV-9521-2016/5/1-HD/NT	CoV-9521-2016/5/1-HD/NT	Egretta picata (pied heron)	Pelecaniformes	Ardeidae	Egretta	Egretta picata	yes	Coronaviridae	Orthocoronavirinae	Deltacoronavirus	Herdecovirus	Deltacoronavirus_nycticoracis	NHCoV_HKU19	Delta_HKU19
Public database	MG764119		392	partial, RdRp		2016-05-01	Australia	Northern Territory		Oropharyngeal and cloacal swabs	Avian coronavirus	CoV-9522-2016/5/1-HD/NT	CoV-9522-2016/5/1-HD/NT	Egretta picata (pied heron)	Pelecaniformes	Ardeidae	Egretta	Egretta picata	yes	Coronaviridae	Orthocoronavirinae	Deltacoronavirus	Herdecovirus	Deltacoronavirus_nycticoracis	NHCoV_HKU19	Delta_HKU19
Public database	MG764120		557	partial, RdRp		2016-05-01	Australia	Northern Territory		Oropharyngeal and cloacal swabs	Avian coronavirus	CoV-9523-2016/5/1-HD/NT	CoV-9523-2016/5/1-HD/NT	Egretta picata (pied heron)	Pelecaniformes	Ardeidae	Egretta	Egretta picata	yes	Coronaviridae	Orthocoronavirinae	Deltacoronavirus	Herdecovirus	Deltacoronavirus_nycticoracis	NHCoV_HKU19	Delta_HKU19
Public database	MG764121		557	partial, RdRp		2016-05-01	Australia	Northern Territory		Oropharyngeal and cloacal swabs	Avian coronavirus	CoV-9524-2016/5/1-HD/NT	CoV-9524-2016/5/1-HD/NT	Egretta picata (pied heron)	Pelecaniformes	Ardeidae	Egretta	Egretta picata	yes	Coronaviridae	Orthocoronavirinae	Deltacoronavirus	Herdecovirus	Deltacoronavirus_nycticoracis	NHCoV_HKU19	Delta_HKU19
Public database	MK617514		441	partial, RdRp		2009-10-22	Poland			Cloacal/fecal swab	Deltacoronavirus sp.	DeltaCoV/AvCoV/Cormorant/Poland/MW332/2009	DeltaCoV/AvCoV/Cormorant/Poland/MW332/2009	cormorant	Suliformes	Phalacrocoracidae	Phalacrocorax	Phalacrocorax carbo	yes	Coronaviridae	Orthocoronavirinae	Deltacoronavirus	Herdecovirus	Deltacoronavirus_nycticoracis	NHCoV_HKU19	Delta_HKU19
Public database	JN788853		357	partial, RdRp		2010-01-12	China	Hong Kong	Mai Po Marshes	Cloacal swabs	Avian coronavirus	J1515/100112	J1515/100112		Suliformes	Phalacrocoracidae	Phalacrocorax	Phalacrocorax carbo	yes	Coronaviridae	Orthocoronavirinae	Deltacoronavirus	Herdecovirus	Deltacoronavirus_nycticoracis	NHCoV_HKU19	Delta_HKU19
Public database	JN788844		357	partial, RdRp		2010-01-12	China	Hong Kong	Mai Po Marshes	Cloacal swabs	Avian coronavirus	J1479/Phalacrocorax carbo/100112	J1479/Phalacrocorax carbo/100112	Phalacrocorax carbo	Suliformes	Phalacrocoracidae	Phalacrocorax	Phalacrocorax carbo	yes	Coronaviridae	Orthocoronavirinae	Deltacoronavirus	Herdecovirus	Deltacoronavirus_nycticoracis	NHCoV_HKU19	Delta_HKU19
Public database	JN788845		357	partial, RdRp		2010-01-12	China	Hong Kong	Mai Po Marshes	Cloacal swabs	Avian coronavirus	J1480/Phalacrocorax carbo/100112	J1480/Phalacrocorax carbo/100112	Phalacrocorax carbo	Suliformes	Phalacrocoracidae	Phalacrocorax	Phalacrocorax carbo	yes	Coronaviridae	Orthocoronavirinae	Deltacoronavirus	Herdecovirus	Deltacoronavirus_nycticoracis	NHCoV_HKU19	Delta_HKU19
Public database	JN788813		357	partial, RdRp		2009-12-17	China	Hong Kong	Mai Po Marshes	Cloacal swabs	Avian coronavirus	J1175/091217	J1175/091217		Suliformes	Phalacrocoracidae	Phalacrocorax	Phalacrocorax carbo	yes	Coronaviridae	Orthocoronavirinae	Deltacoronavirus	Herdecovirus	Deltacoronavirus_nycticoracis	NHCoV_HKU19	Delta_HKU19
Public database	JN788815		357	partial, RdRp		2009-12-17	China	Hong Kong	Mai Po Marshes	Cloacal swabs	Avian coronavirus	J1197/Phalacrocorax carbo/091217	J1197/Phalacrocorax carbo/091217	Phalacrocorax carbo	Suliformes	Phalacrocoracidae	Phalacrocorax	Phalacrocorax carbo	yes	Coronaviridae	Orthocoronavirinae	Deltacoronavirus	Herdecovirus	Deltacoronavirus_nycticoracis	NHCoV_HKU19	Delta_HKU19
Public database	JN788793		357	partial, RdRp		2009-11-27	China	Hong Kong	Mai Po Marshes	Cloacal swabs	Avian coronavirus	J0581/Phalacrocorax carbo/091127	J0581/Phalacrocorax carbo/091127	Phalacrocorax carbo	Suliformes	Phalacrocoracidae	Phalacrocorax	Phalacrocorax carbo	yes	Coronaviridae	Orthocoronavirinae	Deltacoronavirus	Herdecovirus	Deltacoronavirus_nycticoracis	NHCoV_HKU19	Delta_HKU19
Public database	JN788806		357	partial, RdRp		2009-12-17	China	Hong Kong	Mai Po Marshes	Cloacal swabs	Avian coronavirus	J0982/Phalacrocorax carbo/091217	J0982/Phalacrocorax carbo/091217	Phalacrocorax carbo	Suliformes	Phalacrocoracidae	Phalacrocorax	Phalacrocorax carbo	yes	Coronaviridae	Orthocoronavirinae	Deltacoronavirus	Herdecovirus	Deltacoronavirus_nycticoracis	NHCoV_HKU19	Delta_HKU19
Public database	JN788817		357	partial, RdRp		2009-12-17	China	Hong Kong	Mai Po Marshes	Cloacal swabs	Avian coronavirus	J1203/091217	J1203/091217		Suliformes	Phalacrocoracidae	Phalacrocorax	Phalacrocorax carbo	yes	Coronaviridae	Orthocoronavirinae	Deltacoronavirus	Herdecovirus	Deltacoronavirus_nycticoracis	NHCoV_HKU19	Delta_HKU19
Public database	JN788805		357	partial, RdRp		2009-12-17	China	Hong Kong	Mai Po Marshes	Cloacal swabs	Avian coronavirus	J09438/091217	J09438/091217		Suliformes	Phalacrocoracidae	Phalacrocorax	Phalacrocorax carbo	yes	Coronaviridae	Orthocoronavirinae	Deltacoronavirus	Herdecovirus	Deltacoronavirus_nycticoracis	NHCoV_HKU19	Delta_HKU19
Public database	JN788803		357	partial, RdRp		2009-12-17	China	Hong Kong	Mai Po Marshes	Cloacal swabs	Avian coronavirus	J0895/091217	J0895/091217		Suliformes	Phalacrocoracidae	Phalacrocorax	Phalacrocorax carbo	yes	Coronaviridae	Orthocoronavirinae	Deltacoronavirus	Herdecovirus	Deltacoronavirus_nycticoracis	NHCoV_HKU19	Delta_HKU19
Public database	JN788852		357	partial, RdRp		2010-01-12	China	Hong Kong	Mai Po Marshes	Cloacal swabs	Avian coronavirus	J1506/Phalacrocorax carbo/100112	J1506/Phalacrocorax carbo/100112	Phalacrocorax carbo	Suliformes	Phalacrocoracidae	Phalacrocorax	Phalacrocorax carbo	yes	Coronaviridae	Orthocoronavirinae	Deltacoronavirus	Herdecovirus	Deltacoronavirus_nycticoracis	NHCoV_HKU19	Delta_HKU19
Public database	JN788791		357	partial, RdRp		2009-11-27	China	Hong Kong	Mai Po Marshes	Cloacal swabs	Avian coronavirus	J0577/Anas acuta/091127	J0577/Anas acuta/091127	Anas acuta	Anseriformes	Anatidae	Anas	Anas acuta	yes	Coronaviridae	Orthocoronavirinae	Deltacoronavirus	Herdecovirus	Deltacoronavirus_nycticoracis	NHCoV_HKU19	Delta_HKU19
Public database	JN788818		357	partial, RdRp		2009-12-17	China	Hong Kong	Mai Po Marshes	Cloacal swabs	Avian coronavirus	J1211/Phalacrocorax carbo/091217	J1211/Phalacrocorax carbo/091217	Phalacrocorax carbo	Suliformes	Phalacrocoracidae	Phalacrocorax	Phalacrocorax carbo	yes	Coronaviridae	Orthocoronavirinae	Deltacoronavirus	Herdecovirus	Deltacoronavirus_nycticoracis	NHCoV_HKU19	Delta_HKU19
Public database	JN788809		357	partial, RdRp		2009-12-17	China	Hong Kong	Mai Po Marshes	Cloacal swabs	Avian coronavirus	J1022/091217	J1022/091217		Suliformes	Phalacrocoracidae	Phalacrocorax	Phalacrocorax carbo	yes	Coronaviridae	Orthocoronavirinae	Deltacoronavirus	Herdecovirus	Deltacoronavirus_nycticoracis	NHCoV_HKU19	Delta_HKU19
Public database	JN788797		357	partial, RdRp		2009-12-17	China	Hong Kong	Mai Po Marshes	Cloacal swabs	Avian coronavirus	J0719/Phalacrocorax carbo/091217	J0719/Phalacrocorax carbo/091217	Phalacrocorax carbo	Suliformes	Phalacrocoracidae	Phalacrocorax	Phalacrocorax carbo	yes	Coronaviridae	Orthocoronavirinae	Deltacoronavirus	Herdecovirus	Deltacoronavirus_nycticoracis	NHCoV_HKU19	Delta_HKU19
Public database	JN788849		357	partial, RdRp		2010-01-12	China	Hong Kong	Mai Po Marshes	Cloacal swabs	Avian coronavirus	J1493/Anas americana/100112	J1493/Anas americana/100112	Anas americana	Anseriformes	Anatidae	Anas	Anas americana		Coronaviridae	Orthocoronavirinae	Deltacoronavirus	Herdecovirus	Deltacoronavirus_nycticoracis	NHCoV_HKU19	Delta_HKU19
Public database	JN788816		357	partial, RdRp		2009-12-17	China	Hong Kong	Mai Po Marshes	Cloacal swabs	Avian coronavirus	J1201/Phalacrocorax carbo/091217	J1201/Phalacrocorax carbo/091217	Phalacrocorax carbo	Suliformes	Phalacrocoracidae	Phalacrocorax	Phalacrocorax carbo	yes	Coronaviridae	Orthocoronavirinae	Deltacoronavirus	Herdecovirus	Deltacoronavirus_nycticoracis	NHCoV_HKU19	Delta_HKU19
Public database	JN788850		357	partial, RdRp		2010-01-12	China	Hong Kong	Mai Po Marshes	Cloacal swabs	Avian coronavirus	J1497/Anas penelope/100112	J1497/Anas penelope/100112	Anas penelope	Anseriformes	Anatidae	Mareca	Mareca penelope	yes	Coronaviridae	Orthocoronavirinae	Deltacoronavirus	Herdecovirus	Deltacoronavirus_nycticoracis	NHCoV_HKU19	Delta_HKU19
Public database	JN788819		357	partial, RdRp		2009-12-17	China	Hong Kong	Mai Po Marshes	Cloacal swabs	Avian coronavirus	J1215/Phalacrocorax carbo/091217	J1215/Phalacrocorax carbo/091217	Phalacrocorax carbo	Suliformes	Phalacrocoracidae	Phalacrocorax	Phalacrocorax carbo	yes	Coronaviridae	Orthocoronavirinae	Deltacoronavirus	Herdecovirus	Deltacoronavirus_nycticoracis	NHCoV_HKU19	Delta_HKU19
Public database	JN788846		357	partial, RdRp		2010-01-12	China	Hong Kong	Mai Po Marshes	Cloacal swabs	Avian coronavirus	J1481/Phalacrocorax carbo/100112	J1481/Phalacrocorax carbo/100112	Phalacrocorax carbo	Suliformes	Phalacrocoracidae	Phalacrocorax	Phalacrocorax carbo	yes	Coronaviridae	Orthocoronavirinae	Deltacoronavirus	Herdecovirus	Deltacoronavirus_nycticoracis	NHCoV_HKU19	Delta_HKU19
Public database	JN788854		357	partial, RdRp		2010-01-12	China	Hong Kong	Mai Po Marshes	Cloacal swabs	Avian coronavirus	J1517/Phalacrocorax carbo/100112	J1517/Phalacrocorax carbo/100112	Phalacrocorax carbo	Suliformes	Phalacrocoracidae	Phalacrocorax	Phalacrocorax carbo	yes	Coronaviridae	Orthocoronavirinae	Deltacoronavirus	Herdecovirus	Deltacoronavirus_nycticoracis	NHCoV_HKU19	Delta_HKU19
Public database	JN788855		357	partial, RdRp		2010-01-12	China	Hong Kong	Mai Po Marshes	Cloacal swabs	Avian coronavirus	J1518/100112	J1518/100112		Suliformes	Phalacrocoracidae	Phalacrocorax	Phalacrocorax carbo	yes	Coronaviridae	Orthocoronavirinae	Deltacoronavirus	Herdecovirus	Deltacoronavirus_nycticoracis	NHCoV_HKU19	Delta_HKU19
Public database	ON004928		542	partial, RdRp		2020	Russia			cloacal swabs, feces and internal organ fragments	Deltacoronavirus sp.	ACoV/dunlin/Kamchatka/M21302/2020	ACoV/dunlin/Kamchatka/M21302/2020	Calidris alpina	Charadriiformes	Scolopacidae	Calidris	Calidris alpina	yes	Coronaviridae	Orthocoronavirinae	Deltacoronavirus	Buldecovirus	Deltacoronavirus_Sandpipers(NL2)	SandCoV_NL2	Delta_NL2
Public database	ON004926		542	partial, RdRp		2020	Russia			cloacal swabs, feces and internal organ fragments	Deltacoronavirus sp.	ACoV/dunlin/Kamchatka/M21292/2020	ACoV/dunlin/Kamchatka/M21292/2020	Calidris alpina	Charadriiformes	Scolopacidae	Calidris	Calidris alpina	yes	Coronaviridae	Orthocoronavirinae	Deltacoronavirus	Buldecovirus	Deltacoronavirus_Sandpipers(NL2)	SandCoV_NL2	Delta_NL2
Public database	ON004930		542	partial, RdRp		2020	Russia			cloacal swabs, feces and internal organ fragments	Deltacoronavirus sp.	ACoV/dunlin/Kamchatka/M21311/2020	ACoV/dunlin/Kamchatka/M21311/2020	Calidris alpina	Charadriiformes	Scolopacidae	Calidris	Calidris alpina	yes	Coronaviridae	Orthocoronavirinae	Deltacoronavirus	Buldecovirus	Deltacoronavirus_Sandpipers(NL2)	SandCoV_NL2	Delta_NL2
Public database	ON004919		579	partial, RdRp		2020	Russia			cloacal swabs, feces and internal organ fragments	Deltacoronavirus sp.	ACoV/dunlin/Kamchatka/M20542/2020	ACoV/dunlin/Kamchatka/M20542/2020	Calidris alpina	Charadriiformes	Scolopacidae	Calidris	Calidris alpina	yes	Coronaviridae	Orthocoronavirinae	Deltacoronavirus	Buldecovirus	Deltacoronavirus_Sandpipers(NL2)	SandCoV_NL2	Delta_NL2
Public database	MG764094		557	partial, RdRp		2016-12-30	Australia	Victoria		Oropharyngeal and cloacal swabs	Avian coronavirus	CoV-9825-2016/12/30-WS/VIC	CoV-9825-2016/12/30-WS/VIC	Calidris ferruginea (curlew sandpiper)	Charadriiformes	Scolopacidae	Calidris	Calidris ferruginea	yes	Coronaviridae	Orthocoronavirinae	Deltacoronavirus	Buldecovirus	Deltacoronavirus_Sandpipers(NL2)	SandCoV_NL2	Delta_NL2
Public database	ON004916		579	partial, RdRp		2020	Russia			cloacal swabs, feces and internal organ fragments	Deltacoronavirus sp.	ACoV/red-necked stint/Kamchatka/M20532/2020	ACoV/red-necked stint/Kamchatka/M20532/2020	Calidris ruficollis	Charadriiformes	Scolopacidae	Calidris	Calidris ruficollis	yes	Coronaviridae	Orthocoronavirinae	Deltacoronavirus	Buldecovirus	Deltacoronavirus_Sandpipers(NL2)	SandCoV_NL2	Delta_NL2
Public database	ON004925		379	partial, RdRp		2020	Russia			cloacal swabs, feces and internal organ fragments	Deltacoronavirus sp.	ACoV/red-necked stint/Kamchatka/M21282/2020	ACoV/red-necked stint/Kamchatka/M21282/2020	Calidris ruficollis	Charadriiformes	Scolopacidae	Calidris	Calidris ruficollis	yes	Coronaviridae	Orthocoronavirinae	Deltacoronavirus	Buldecovirus	Deltacoronavirus_Sandpipers(NL2)	SandCoV_NL2	Delta_NL2
Public database	MG764133		557	partial, RdRp		2016-12-29	Australia	Victoria		Oropharyngeal and cloacal swabs	Avian coronavirus	CoV-9795-2016/12/29-WS/VIC	CoV-9795-2016/12/29-WS/VIC	Calidris ruficollis (red-necked stint)	Charadriiformes	Scolopacidae	Calidris	Calidris ruficollis	yes	Coronaviridae	Orthocoronavirinae	Deltacoronavirus	Buldecovirus	Deltacoronavirus_Sandpipers(NL2)	SandCoV_NL2	Delta_NL2
Public database	MG764125		557	partial, RdRp		2017-01-21	Australia	Victoria		Oropharyngeal and cloacal swabs	Avian coronavirus	CoV-10467-2017/1/21-BI/VIC	CoV-10467-2017/1/21-BI/VIC	Calidris ruficollis (red-necked stint)	Charadriiformes	Scolopacidae	Calidris	Calidris ruficollis	yes	Coronaviridae	Orthocoronavirinae	Deltacoronavirus	Buldecovirus	Deltacoronavirus_Sandpipers(NL2)	SandCoV_NL2	Delta_NL2
Public database	ON004929		542	partial, RdRp		2020	Russia			cloacal swabs, feces and internal organ fragments	Deltacoronavirus sp.	ACoV/dunlin/Kamchatka/M21303/2020	ACoV/dunlin/Kamchatka/M21303/2020	Calidris alpina	Charadriiformes	Scolopacidae	Calidris	Calidris alpina	yes	Coronaviridae	Orthocoronavirinae	Deltacoronavirus	Buldecovirus	Deltacoronavirus_Sandpipers(NL2)	SandCoV_NL2	Delta_NL2
Public database	ON004917		579	partial, RdRp		2020	Russia			cloacal swabs, feces and internal organ fragments	Deltacoronavirus sp.	ACoV/red-necked stint/Kamchatka/M20533/2020	ACoV/red-necked stint/Kamchatka/M20533/2020	Calidris ruficollis	Charadriiformes	Scolopacidae	Calidris	Calidris ruficollis	yes	Coronaviridae	Orthocoronavirinae	Deltacoronavirus	Buldecovirus	Deltacoronavirus_Sandpipers(NL2)	SandCoV_NL2	Delta_NL2
Public database	ON004918		579	partial, RdRp		2020	Russia			cloacal swabs, feces and internal organ fragments	Deltacoronavirus sp.	ACoV/dunlin/Kamchatka/M20541/2020	ACoV/dunlin/Kamchatka/M20541/2020	Calidris alpina	Charadriiformes	Scolopacidae	Calidris	Calidris alpina	yes	Coronaviridae	Orthocoronavirinae	Deltacoronavirus	Buldecovirus	Deltacoronavirus_Sandpipers(NL2)	SandCoV_NL2	Delta_NL2
Public database	ON004927		379	partial, RdRp		2020	Russia			cloacal swabs, feces and internal organ fragments	Deltacoronavirus sp.	ACoV/dunlin/Kamchatka/M21293/2020	ACoV/dunlin/Kamchatka/M21293/2020	Calidris alpina	Charadriiformes	Scolopacidae	Calidris	Calidris alpina	yes	Coronaviridae	Orthocoronavirinae	Deltacoronavirus	Buldecovirus	Deltacoronavirus_Sandpipers(NL2)	SandCoV_NL2	Delta_NL2
Public database	MK617499		472	partial, RdRp		2013-08-25	Poland			Cloacal/fecal swab	Deltacoronavirus sp.	DeltaCoV/AvCoV/Common_snipe/Poland/Mor78/25/2013	DeltaCoV/AvCoV/Common_snipe/Poland/Mor78/25/2013	common snipe	Charadriiformes	Scolopacidae	Gallinago	Gallinago gallinago	yes	Coronaviridae	Orthocoronavirinae	Deltacoronavirus	Buldecovirus	Deltacoronavirus_Sandpipers(NL2)	SandCoV_NL2	Delta_NL2
Public database	MG764156		557	partial, RdRp		2016-11-28	Australia	South Australia		Oropharyngeal and cloacal swabs	Avian coronavirus	CoV-9698-2016/11/28-BP/SA	CoV-9698-2016/11/28-BP/SA	Arenaria interpres (ruddy turnstone)	Charadriiformes	Scolopacidae	Arenaria	Arenaria interpres	yes	Coronaviridae	Orthocoronavirinae	Deltacoronavirus	Buldecovirus	Deltacoronavirus_Sandpipers(NL2)	SandCoV_NL2	Delta_NL2
Public database	MG764139		392	partial, RdRp		2016-11-18	Australia	Tasmania		Oropharyngeal and cloacal swabs	Avian coronavirus	CoV-9574-2016/11/18-BB/TAS	CoV-9574-2016/11/18-BB/TAS	Arenaria interpres (ruddy turnstone)	Charadriiformes	Scolopacidae	Arenaria	Arenaria interpres	yes	Coronaviridae	Orthocoronavirinae	Deltacoronavirus	Buldecovirus	Deltacoronavirus_Sandpipers(NL2)	SandCoV_NL2	Delta_NL2
Public database	MH090081		560	partial, RdRp		2016-11-18	Australia	Tasmania		feces	Deltacoronavirus sp.	CoV-9567-2016/11/18-BB/TAS	CoV-9567-2016/11/18-BB/TAS	Arenaria interpres (ruddy turnstone)	Charadriiformes	Scolopacidae	Arenaria	Arenaria interpres	yes	Coronaviridae	Orthocoronavirinae	Deltacoronavirus	Buldecovirus	Deltacoronavirus_Sandpipers(NL2)	SandCoV_NL2	Delta_NL2
Public database	MG764146		502	partial, RdRp		2016-11-19	Australia	Tasmania		Oropharyngeal and cloacal swabs	Avian coronavirus	CoV-9610-2016/11/19-CM/TAS	CoV-9610-2016/11/19-CM/TAS	Arenaria interpres (ruddy turnstone)	Charadriiformes	Scolopacidae	Arenaria	Arenaria interpres	yes	Coronaviridae	Orthocoronavirinae	Deltacoronavirus	Buldecovirus	Deltacoronavirus_Sandpipers(NL2)	SandCoV_NL2	Delta_NL2
Public database	MG764136		557	partial, RdRp		2016-11-18	Australia	Tasmania		Oropharyngeal and cloacal swabs	Avian coronavirus	CoV-9560-2016/11/18-BB/TAS	CoV-9560-2016/11/18-BB/TAS	Arenaria interpres (ruddy turnstone)	Charadriiformes	Scolopacidae	Arenaria	Arenaria interpres	yes	Coronaviridae	Orthocoronavirinae	Deltacoronavirus	Buldecovirus	Deltacoronavirus_Sandpipers(NL2)	SandCoV_NL2	Delta_NL2
Public database	MT993565		26001	complete genome		2014	Australia	Tasmania	NA	Tasmania	Shorebird deltacoronavirus	MW01_1o	MW01_1o	Arenaria interpres (ruddy turnstone)	Charadriiformes	Scolopacidae	Arenaria	Arenaria interpres	yes	Coronaviridae	Orthocoronavirinae	Deltacoronavirus	Buldecovirus	Deltacoronavirus_Sandpipers(NL2)	SandCoV_NL2	Delta_NL2
Public database	JQ065049		26223	complete genome	yes	2007	China	Hong Kong		tracheal, rectal, and cloacal swabs and nasopharyngeal aspirates	Common moorhen coronavirus HKU21	HKU21-8295	HKU21-8295	common moorhen	Gruiformes	Rallidae	Gallinula	Gallinula chloropus	yes	Coronaviridae	Orthocoronavirinae	Deltacoronavirus	Buldecovirus	Deltacoronavirus_gallinulae	CMCoV_HKU21	Delta_HKU21
Public database	NC_016996		26223	complete genome		2007	China	Hong Kong		tracheal, rectal, and cloacal swabs and nasopharyngeal aspirates	Common moorhen coronavirus HKU21	HKU21-8295	HKU21-8295	common moorhen	Gruiformes	Rallidae	Gallinula	Gallinula chloropus	yes	Coronaviridae	Orthocoronavirinae	Deltacoronavirus	Buldecovirus	Deltacoronavirus_gallinulae	CMCoV_HKU21	Delta_HKU21
Public database	JQ065044		26041	complete genome	yes	2007	China	Hong Kong		tracheal, rectal, and cloacal swabs and nasopharyngeal aspirates	White-eye coronavirus HKU16	HKU16-6847	HKU16-6847	white-eye	Passeriformes	Zosteropidae	Zosterops	Zosterops simplex		Coronaviridae	Orthocoronavirinae	Deltacoronavirus	Buldecovirus	Deltacoronavirus_zosteropis	WECoV_HKU16	Delta_HKU16
Public database	NC_016991		26041	complete genome		2007	China	Hong Kong		tracheal, rectal, and cloacal swabs and nasopharyngeal aspirates	White-eye coronavirus HKU16	HKU16-6847	HKU16-6847	white-eye	Passeriformes	Zosteropidae	Zosterops	Zosterops simplex		Coronaviridae	Orthocoronavirinae	Deltacoronavirus	Buldecovirus	Deltacoronavirus_zosteropis	WECoV_HKU16	Delta_HKU16
Public database	MK204388		24511	complete genome		2012	Australia	Victoria		tissue	Avian coronavirus MW05	MW05	MW05	Calidris acuminata	Charadriiformes	Scolopacidae	Calidris	Calidris acuminata	yes	Coronaviridae	Orthocoronavirinae	Deltacoronavirus	Buldecovirus	Deltacoronavirus_zosteropis	WECoV_HKU16	Delta_HKU16
Public database	MK617512		472	partial, RdRp		2017-02-14	Poland			Cloacal/fecal swab	Deltacoronavirus sp.	DeltaCoV/AvCoV/Common_gull/Poland/P114/1/2017	DeltaCoV/AvCoV/Common_gull/Poland/P114/1/2017	common gull	Charadriiformes	Laridae	Larus	Larus canus	yes	Coronaviridae	Orthocoronavirinae	Deltacoronavirus	Buldecovirus	Deltacoronavirus_zosteropis	WECoV_HKU16	Delta_HKU16
Public database	MK617502		472	partial, RdRp		2014-01-01	Poland			Cloacal/fecal swab	Deltacoronavirus sp.	DeltaCoV/AvCoV/Black- headed_gull/Poland/Mor001/36/2014	DeltaCoV/AvCoV/Black- headed_gull/Poland/Mor001/36/2014	black-headed gull	Charadriiformes	Laridae	Chroicocephalus	Chroicocephalus ridibundus		Coronaviridae	Orthocoronavirinae	Deltacoronavirus	Buldecovirus	Deltacoronavirus_zosteropis	WECoV_HKU16	Delta_HKU16
Public database	MK617506		472	partial, RdRp		2015-12-14	Poland			Cloacal/fecal swab	Deltacoronavirus sp.	DeltaCoV/AvCoV/Black- headed_gull/Poland/P149/10/2015	DeltaCoV/AvCoV/Black- headed_gull/Poland/P149/10/2015	black-headed gull	Charadriiformes	Laridae	Chroicocephalus	Chroicocephalus ridibundus		Coronaviridae	Orthocoronavirinae	Deltacoronavirus	Buldecovirus	Deltacoronavirus_zosteropis	WECoV_HKU16	Delta_HKU16
Public database	OQ535490		26023	complete genome		2018-06-12	Poland				black-headed gull deltacoronavirus	BHGdCoV/Poland/P052/2018	BHGdCoV/Poland/P052/2018	Chroicocephalus ridibundus	Charadriiformes	Laridae	Chroicocephalus	Chroicocephalus ridibundus		Coronaviridae	Orthocoronavirinae	Deltacoronavirus	Buldecovirus	Deltacoronavirus_zosteropis	WECoV_HKU16	Delta_HKU16
Public database	LC364342		26162	complete genome		2013-12-05	United Arab Emirates	Dubai		fecal sample	Falcon coronavirus UAE-HKU27			Falco sp.	Falconiformes	Falconidae	Falco	Falco sp.		Coronaviridae	Orthocoronavirinae	Deltacoronavirus	Buldecovirus	Deltacoronavirus_zosteropis	WECoV_HKU16	Delta_HKU16
Public database	MK617500		472	partial, RdRp		2013-11-28	Poland			Cloacal/fecal swab	Deltacoronavirus sp.	DeltaCoV/AvCoV/Black- headed_gull/Poland/Mor109/6/2013	DeltaCoV/AvCoV/Black- headed_gull/Poland/Mor109/6/2013	black-headed gull	Charadriiformes	Laridae	Chroicocephalus	Chroicocephalus ridibundus		Coronaviridae	Orthocoronavirinae	Deltacoronavirus	Buldecovirus	Deltacoronavirus_zosteropis	WECoV_HKU16	Delta_HKU16
Public database	MK617497		461	partial, RdRp		2009-11-13	Poland			Cloacal/fecal swab	Deltacoronavirus sp.	DeltaCoV/AvCoV/Black- headed_gull/Poland/Mor358/2/2011	DeltaCoV/AvCoV/Black- headed_gull/Poland/Mor358/2/2011	black-headed gull	Charadriiformes	Laridae	Chroicocephalus	Chroicocephalus ridibundus		Coronaviridae	Orthocoronavirinae	Deltacoronavirus	Buldecovirus	Deltacoronavirus_zosteropis	WECoV_HKU16	Delta_HKU16
Public database	LC364343		26155	complete genome		2013-04-07	United Arab Emirates	Dubai		fecal sample	Houbara coronavirus UAE-HKU28			Chlamydotis sp. (Houbara)	Otidiformes	Otididae	Chlamydotis	Chlamydotis undulata		Coronaviridae	Orthocoronavirinae	Deltacoronavirus	Buldecovirus	Deltacoronavirus_zosteropis	WECoV_HKU16	Delta_HKU16
Public database	LC364344		26155	complete genome		2017-03-28	United Arab Emirates	Dubai		fecal sample	Pigeon coronavirus UAE-HKU29			Columbidae sp. (Pigeon)	Columbiformes	Columbidae	Columba	Columba livia		Coronaviridae	Orthocoronavirinae	Deltacoronavirus	Buldecovirus	Deltacoronavirus_zosteropis	WECoV_HKU16	Delta_HKU16
Public database	MK617507		472	partial, RdRp		2016-01-23	Poland			Cloacal/fecal swab	Deltacoronavirus sp.	DeltaCoV/AvCoV/Common_gull/Poland/P016/9/2016	DeltaCoV/AvCoV/Common_gull/Poland/P016/9/2016	common gull	Charadriiformes	Laridae	Larus	Larus canus	yes	Coronaviridae	Orthocoronavirinae	Deltacoronavirus	Buldecovirus	Deltacoronavirus_zosteropis	WECoV_HKU16	Delta_HKU16
Public database	MK617509		472	partial, RdRp		2016-05-24	Poland			Cloacal/fecal swab	Deltacoronavirus sp.	DeltaCoV/AvCoV/Black- headed_gull/Poland/P040/8/2016	DeltaCoV/AvCoV/Black- headed_gull/Poland/P040/8/2016	black-headed gull	Charadriiformes	Laridae	Chroicocephalus	Chroicocephalus ridibundus		Coronaviridae	Orthocoronavirinae	Deltacoronavirus	Buldecovirus	Deltacoronavirus_zosteropis	WECoV_HKU16	Delta_HKU16
Public database	OQ535492		26147	complete genome		2017-12-03	Poland				black-headed gull deltacoronavirus	BHGdCoV/Poland/P350/2017	BHGdCoV/Poland/P350/2017	Chroicocephalus ridibundus	Charadriiformes	Laridae	Chroicocephalus	Chroicocephalus ridibundus		Coronaviridae	Orthocoronavirinae	Deltacoronavirus	Buldecovirus	Deltacoronavirus_zosteropis	WECoV_HKU16	Delta_HKU16
Public database	MK617513		472	partial, RdRp		2017-12-03	Poland			Cloacal/fecal swab	Deltacoronavirus sp.	DeltaCoV/AvCoV/Black- headed_gull/Poland/P350/5/2017	DeltaCoV/AvCoV/Black- headed_gull/Poland/P350/5/2017	black-headed gull	Charadriiformes	Laridae	Chroicocephalus	Chroicocephalus ridibundus		Coronaviridae	Orthocoronavirinae	Deltacoronavirus	Buldecovirus	Deltacoronavirus_zosteropis	WECoV_HKU16	Delta_HKU16
Public database	OQ535491		25653	complete genome		2018-12-05	Poland				black-headed gull deltacoronavirus	BHGdCoV/Poland/P103/2018	BHGdCoV/Poland/P103/2018	Chroicocephalus ridibundus	Charadriiformes	Laridae	Chroicocephalus	Chroicocephalus ridibundus		Coronaviridae	Orthocoronavirinae	Deltacoronavirus	Buldecovirus	Deltacoronavirus_zosteropis	WECoV_HKU16	Delta_HKU16
Public database	OQ535493		26090	complete genome		2019-01-10	Poland				common gull deltacoronavirus	CGdCoV/Poland/P005/2019	CGdCoV/Poland/P005/2019	Larus canus	Charadriiformes	Laridae	Larus	Larus canus	yes	Coronaviridae	Orthocoronavirinae	Deltacoronavirus	Buldecovirus	Deltacoronavirus_zosteropis	WECoV_HKU16	Delta_HKU16
Public database	MK617510		472	partial, RdRp		2016-08-20	Poland			Cloacal/fecal swab	Deltacoronavirus sp.	DeltaCoV/AvCoV/Hering_gull/Poland/P064/3/2016	DeltaCoV/AvCoV/Hering_gull/Poland/P064/3/2016	hering gull	Charadriiformes	Laridae	Larus	Larus argentatus	yes	Coronaviridae	Orthocoronavirinae	Deltacoronavirus	Buldecovirus	Deltacoronavirus_zosteropis	WECoV_HKU16	Delta_HKU16
Public database	MT025058		18944	partial genome		2014	Antarctica	Isla Kopaitik		feces	Gentoo penguin virus	Antartic1	Antartic1	Pygoscelis papua	Sphenisciformes	Spheniscidae	Pygoscelis	Pygoscelis papua		Coronaviridae	Orthocoronavirinae	Deltacoronavirus	Buldecovirus	Deltacoronavirus_zosteropis	WECoV_HKU16	Delta_HKU16
Public database	ON004922		379	partial, RdRp		2020	Russia			cloacal swabs, feces and internal organ fragments	Deltacoronavirus sp.	ACoV/gadwall/YaNAO-Russia/M21343/2020	ACoV/gadwall/YaNAO-Russia/M21343/2020	Mareca strepera	Anseriformes	Anatidae	Mareca	Mareca penelope	yes	Coronaviridae	Orthocoronavirinae	Deltacoronavirus	Buldecovirus	Deltacoronavirus_zosteropis	WECoV_HKU16	Delta_HKU16
Public database	KU321641		225	partial, RdRp		2009-11-19	Brazil	Lagoa do Peixe National Park, RS		oral/cloacal swab	Rynchops niger coronavirus	PNLP115	PNLP115	Rynchops niger	Charadriiformes	Laridae	Rynchops	Rynchops niger	yes	Coronaviridae	Orthocoronavirinae	Deltacoronavirus	Buldecovirus	Deltacoronavirus_zosteropis	WECoV_HKU16	Delta_HKU16
Public database	ON004924		379	partial, RdRp		2020	Russia			cloacal swabs, feces and internal organ fragments	Deltacoronavirus sp.	ACoV/slaty-backed gull/Kamchatka/M2326/2020	ACoV/slaty-backed gull/Kamchatka/M2326/2020	slaty-backed gull	Charadriiformes	Laridae	Larus	Larus schistisagus	yes	Coronaviridae	Orthocoronavirinae	Deltacoronavirus	Buldecovirus	Deltacoronavirus_zosteropis	WECoV_HKU16	Delta_HKU16
Public database	OM642547		381	partial, RdRp		2018-11-18	South Korea			feces	Deltacoronavirus sp.	Eastern spot-billed duck/South Korea/SW16/2018	Eastern spot-billed duck/South Korea/SW16/2018	Eastern spot-billed duck	Anseriformes	Anatidae	Anas	Anas zonorhyncha	yes	Coronaviridae	Orthocoronavirinae	Deltacoronavirus	Buldecovirus	Deltacoronavirus_zosteropis	WECoV_HKU16	Delta_HKU16
Public database	OM642545		381	partial, RdRp		2017-10-25	South Korea			feces	Deltacoronavirus sp.	North pintail/South Korea/SW9/2017	North pintail/South Korea/SW9/2017	North pintail	Anseriformes	Anatidae	Anas	Anas acuta	yes	Coronaviridae	Orthocoronavirinae	Deltacoronavirus	Buldecovirus	Deltacoronavirus_zosteropis	WECoV_HKU16	Delta_HKU16
Public database	OM642546		381	partial, RdRp		2018-11-21	South Korea			feces	Deltacoronavirus sp.	Eurasian teal/South Korea/SW24/2018	Eurasian teal/South Korea/SW24/2018	Eurasian teal	Anseriformes	Anatidae	Anas	Anas crecca	yes	Coronaviridae	Orthocoronavirinae	Deltacoronavirus	Buldecovirus	Deltacoronavirus_zosteropis	WECoV_HKU16	Delta_HKU16
Public database	OM642548		336	partial, RdRp		2018-11-18	South Korea			feces	Deltacoronavirus sp.	Eastern spot-billed duck/South Korea/SW13/2018	Eastern spot-billed duck/South Korea/SW13/2018	Eastern spot-billed duck	Anseriformes	Anatidae	Anas	Anas zonorhyncha	yes	Coronaviridae	Orthocoronavirinae	Deltacoronavirus	Buldecovirus	Deltacoronavirus_zosteropis	WECoV_HKU16	Delta_HKU16
Public database	KX588674		461	partial, RdRp		2013-08-14	Finland			cloacal swab, tracheal swab, oropharyngeal swab, or tissue	Avian coronavirus	AvCoV/Chroicocephalus_ridibundus/Finland/10083/2013		Chroicocephalus ridibundus	Charadriiformes	Laridae	Chroicocephalus	Chroicocephalus ridibundus		Coronaviridae	Orthocoronavirinae	Deltacoronavirus	Buldecovirus	Deltacoronavirus_zosteropis	WECoV_HKU16	Delta_HKU16
Public database	KX588673		461	partial, RdRp		2013-08-14	Finland			cloacal swab, tracheal swab, oropharyngeal swab, or tissue	Avian coronavirus	AvCoV/Larus_fuscus/Finland/10059/2013		Larus fuscus	Charadriiformes	Laridae	Chroicocephalus	Chroicocephalus ridibundus		Coronaviridae	Orthocoronavirinae	Deltacoronavirus	Buldecovirus	Deltacoronavirus_zosteropis	WECoV_HKU16	Delta_HKU16
Public database	MK617503		465	partial, RdRp		2014-11-29	Poland			Cloacal/fecal swab	Deltacoronavirus sp.	DeltaCoV/AvCoV/Common_gull/Poland/P147/2/2014	DeltaCoV/AvCoV/Common_gull/Poland/P147/2/2014	common gull	Charadriiformes	Laridae	Larus	Larus canus	yes	Coronaviridae	Orthocoronavirinae	Deltacoronavirus	Buldecovirus	Deltacoronavirus_zosteropis	WECoV_HKU16	Delta_HKU16
Public database	ON605854		379	partial, RdRp		2020	Russia				Deltacoronavirus sp.	AvCoV/eurasion wigeon/YaNAO-Russia/M2140/2020	AvCoV/eurasion wigeon/YaNAO-Russia/M2140/2020	eurasion wigeon	Anseriformes	Anatidae	Mareca	Mareca penelope	yes	Coronaviridae	Orthocoronavirinae	Deltacoronavirus	Buldecovirus	Deltacoronavirus_zosteropis	WECoV_HKU16	Delta_HKU16
Public database	ON605856		379	partial, RdRp		2020	Russia				Deltacoronavirus sp.	AvCoV/pomarine jaeger/YaNAO-Russia/M2138/2020	AvCoV/pomarine jaeger/YaNAO-Russia/M2138/2020	pomarine jaeger	Charadriiformes	Stercorariidae	pomarine	pomarine jaeger		Coronaviridae	Orthocoronavirinae	Deltacoronavirus	Buldecovirus	Deltacoronavirus_zosteropis	WECoV_HKU16	Delta_HKU16
Public database	ON004920		379	partial, RdRp		2020	Russia			cloacal swabs, feces and internal organ fragments	Deltacoronavirus sp.	ACoV/gadwall/Novosibirsk/M2127/2020	ACoV/gadwall/Novosibirsk/M2127/2020	gadwall	Anseriformes	Anatidae	Mareca	Mareca strepera	yes	Coronaviridae	Orthocoronavirinae	Deltacoronavirus	Buldecovirus	Deltacoronavirus_zosteropis	WECoV_HKU16	Delta_HKU16
Public database	MK617504		472	partial, RdRp		2015-08-08	Poland			Cloacal/fecal swab	Deltacoronavirus sp.	DeltaCoV/AvCoV/Black- headed_gull/Poland/P087/40/2015	DeltaCoV/AvCoV/Black- headed_gull/Poland/P087/40/2015	black-headed gull	Charadriiformes	Laridae	Chroicocephalus	Chroicocephalus ridibundus		Coronaviridae	Orthocoronavirinae	Deltacoronavirus	Buldecovirus	Deltacoronavirus_zosteropis	WECoV_HKU16	Delta_HKU16
Public database	MK617508		461	partial, RdRp		2016-01-24	Poland			Cloacal/fecal swab	Deltacoronavirus sp.	DeltaCoV/AvCoV/Black- headed_gull/Poland/P016/12/2016	DeltaCoV/AvCoV/Black- headed_gull/Poland/P016/12/2016	black-headed gull	Charadriiformes	Laridae	Chroicocephalus	Chroicocephalus ridibundus		Coronaviridae	Orthocoronavirinae	Deltacoronavirus	Buldecovirus	Deltacoronavirus_zosteropis	WECoV_HKU16	Delta_HKU16
Public database	MK617498		472	partial, RdRp		2012-09-29	Poland			Cloacal/fecal swab	Deltacoronavirus sp.	DeltaCoV/AvCoV/Common_gull/Poland/Mor17/4/2012	DeltaCoV/AvCoV/Common_gull/Poland/Mor17/4/2012	common gull	Charadriiformes	Laridae	Larus	Larus canus	yes	Coronaviridae	Orthocoronavirinae	Deltacoronavirus	Buldecovirus	Deltacoronavirus_zosteropis	WECoV_HKU16	Delta_HKU16
Public database	MK617515		465	partial, RdRp		2011-10-19	Poland			Cloacal/fecal swab	Deltacoronavirus sp.	DeltaCoV/AvCoV/Common_gull/Poland/MW241/2011	DeltaCoV/AvCoV/Common_gull/Poland/MW241/2011	common gull	Charadriiformes	Laridae	Larus	Larus canus	yes	Coronaviridae	Orthocoronavirinae	Deltacoronavirus	Buldecovirus	Deltacoronavirus_zosteropis	WECoV_HKU16	Delta_HKU16
Public database	MK617501		472	partial, RdRp		2013-12-20	Poland			Cloacal/fecal swab	Deltacoronavirus sp.	DeltaCoV/AvCoV/Black- headed_gull/Poland/Mor118pool2/2013	DeltaCoV/AvCoV/Black- headed_gull/Poland/Mor118pool2/2013	black-headed gull	Charadriiformes	Laridae	Chroicocephalus	Chroicocephalus ridibundus		Coronaviridae	Orthocoronavirinae	Deltacoronavirus	Buldecovirus	Deltacoronavirus_zosteropis	WECoV_HKU16	Delta_HKU16
Public database	OP355475		379	partial, RdRp		2020	Viet Nam	Ca Mau		cloacal swabs, droppings and internal organ fragments	Deltacoronavirus sp.	AvCoV/indian cormorant/Vietnam/M2347/2020	AvCoV/indian cormorant/Vietnam/M2347/2020	indian cormorant	Suliformes	Phalacrocoracidae	Phalacrocorax	Phalacrocorax fuscicollis		Coronaviridae	Orthocoronavirinae	Deltacoronavirus	Buldecovirus	Deltacoronavirus_zosteropis	WECoV_HKU16	Delta_HKU16
Public database	MK617495		472	partial, RdRp		2009-10-23	Poland			Cloacal/fecal swab	Deltacoronavirus sp.	DeltaCoV/AvCoV/Common_tern/Poland/Mor340/2009	DeltaCoV/AvCoV/Common_tern/Poland/Mor340/2009	common tern	Charadriiformes	Laridae	Sterna	Sterna hirundo	yes	Coronaviridae	Orthocoronavirinae	Deltacoronavirus	Buldecovirus	Deltacoronavirus_zosteropis	WECoV_HKU16	Delta_HKU16
Public database	MK617511		472	partial, RdRp		2017-01-17	Poland			Cloacal/fecal swab	Deltacoronavirus sp.	DeltaCoV/AvCoV/Common_gull/Poland/P021/6/2017	DeltaCoV/AvCoV/Common_gull/Poland/P021/6/2017	common gull	Charadriiformes	Laridae	Larus	Larus canus	yes	Coronaviridae	Orthocoronavirinae	Deltacoronavirus	Buldecovirus	Deltacoronavirus_zosteropis	WECoV_HKU16	Delta_HKU16
Public database	MK617505		472	partial, RdRp		2014-12-03	Poland			Cloacal/fecal swab	Deltacoronavirus sp.	DeltaCoV/AvCoV/Common_gull/Poland/P151/4/2014	DeltaCoV/AvCoV/Common_gull/Poland/P151/4/2014	common gull	Charadriiformes	Laridae	Larus	Larus canus	yes	Coronaviridae	Orthocoronavirinae	Deltacoronavirus	Buldecovirus	Deltacoronavirus_zosteropis	WECoV_HKU16	Delta_HKU16
Public database	ON004923		379	partial, RdRp		2020	Russia			cloacal swabs, feces and internal organ fragments	Deltacoronavirus sp.	ACoV/siberian gull/YaNAO-Russia/M21362/2020	ACoV/siberian gull/YaNAO-Russia/M21362/2020	siberian gull	Charadriiformes	Laridae	Larus	Larus heuglini		Coronaviridae	Orthocoronavirinae	Deltacoronavirus	Buldecovirus	Deltacoronavirus_zosteropis	WECoV_HKU16	Delta_HKU16
Public database	OP355476		379	partial, RdRp		2020	Viet Nam	Ca Mau		cloacal swabs, droppings and internal organ fragments	Deltacoronavirus sp.	AvCoV/indian cormorant/Vietnam/M2348/2020	AvCoV/indian cormorant/Vietnam/M2348/2020	indian cormorant	Suliformes	Phalacrocoracidae	Phalacrocorax	Phalacrocorax fuscicollis		Coronaviridae	Orthocoronavirinae	Deltacoronavirus	Buldecovirus	Deltacoronavirus_zosteropis	WECoV_HKU16	Delta_HKU16
Public database	OP355478		379	partial, RdRp		2020	Viet Nam	Ca Mau		cloacal swabs, droppings and internal organ fragments	Deltacoronavirus sp.	AvCoV/little egret /Vietnam/M2340/2020	AvCoV/little egret /Vietnam/M2340/2020	little egret	Pelecaniformes	Ardeidae	Egretta	Egretta garzetta	yes	Coronaviridae	Orthocoronavirinae	Deltacoronavirus	Buldecovirus	Deltacoronavirus_zosteropis	WECoV_HKU16	Delta_HKU16
Public database	ON004921		379	partial, RdRp		2020	Russia			cloacal swabs, feces and internal organ fragments	Deltacoronavirus sp.	ACoV/gadwall/YaNAO-Russia/M21342/2020	ACoV/gadwall/YaNAO-Russia/M21342/2020	gadwall	Anseriformes	Anatidae	Mareca	Mareca strepera	yes	Coronaviridae	Orthocoronavirinae	Deltacoronavirus	Buldecovirus	Deltacoronavirus_zosteropis	WECoV_HKU16	Delta_HKU16
Public database	FJ376620		26476	complete genome		2007-01-01	China	Hong Kong		Tracheal and cloacal swab	Bulbul coronavirus HKU11-796	HKU11-796	HKU11-796	Chinese bulbul	Passeriformes	Pycnonotidae	Pycnonotus	Pycnonotus sinensis	yes	Coronaviridae	Orthocoronavirinae	Deltacoronavirus	Buldecovirus	Deltacoronavirus_pycnonoti	BulCV_HKU11	Delta_HKU11
Public database	FJ376619		26487	complete genome	yes	2007-01-01	China	Hong Kong		Tracheal and cloacal swab	Bulbul coronavirus HKU11-934	HKU11-934	HKU11-934	red-whiskered bulbul	Passeriformes	Pycnonotidae	Pycnonotus	Pycnonotus jocosus		Coronaviridae	Orthocoronavirinae	Deltacoronavirus	Buldecovirus	Deltacoronavirus_pycnonoti	BulCV_HKU11	Delta_HKU11
Public database	MT138109		26027	complete genome		2018				anal swab	Deltacoronavirus sp.	thr147cor1	thr147cor1					待确认		Coronaviridae	Orthocoronavirinae	Deltacoronavirus	Buldecovirus	Deltacoronavirus_pycnonoti	BulCV_HKU11	Delta_HKU11
Public database	MT138106		26310	complete genome		2018				anal swab	Deltacoronavirus sp.	dut148cor1	dut148cor1					待确认		Coronaviridae	Orthocoronavirinae	Deltacoronavirus	Buldecovirus	Deltacoronavirus_pycnonoti	BulCV_HKU11	Delta_HKU11
Public database	FJ376621		26396	complete genome		2007-01-01	China	Hong Kong		Tracheal and cloacal swab	Thrush coronavirus HKU12-600	HKU12-600	HKU12-600	grey-backed thrush	Passeriformes	Turdidae	Turdus	Turdus hortulorum	yes	Coronaviridae	Orthocoronavirinae	Deltacoronavirus	Buldecovirus	Deltacoronavirus_pycnonoti	BulCV_HKU11	Delta_HKU11
Public database	NC_011549		26396	complete genome		2007-01-01	China	Hong Kong		Tracheal and cloacal swab	Thrush coronavirus HKU12-600	HKU12-600	HKU12-600	grey-backed thrush	Passeriformes	Turdidae	Turdus	Turdus hortulorum	yes	Coronaviridae	Orthocoronavirinae	Deltacoronavirus	Buldecovirus	Deltacoronavirus_pycnonoti	BulCV_HKU11	Delta_HKU11
Public database	NC_011550		26552	complete genome	yes	2007-04-01	China	Hong Kong		Tracheal and cloacal swab	Munia coronavirus HKU13-3514	HKU13-3514	HKU13-3514	white-rumped munia	Passeriformes	Estrildidae	Lonchura	Lonchura striata		Coronaviridae	Orthocoronavirinae	Deltacoronavirus	Buldecovirus	Deltacoronavirus_lonchurae	MunCV_HKU13	Delta_HKU13
Public database	JQ065046		26689	complete genome		2007	China	Hong Kong		tracheal, rectal, and cloacal swabs and nasopharyngeal aspirates	Magpie-robin coronavirus HKU18	HKU18-chu3	HKU18-chu3	magpie-robin	Passeriformes	Muscicapidae	Copsychus	Copsychus saularis		Coronaviridae	Orthocoronavirinae	Deltacoronavirus	Buldecovirus	Deltacoronavirus_lonchurae	MunCV_HKU13	Delta_HKU13
Public database	NC_016993		26689	complete genome		2007	China	Hong Kong		tracheal, rectal, and cloacal swabs and nasopharyngeal aspirates	Magpie-robin coronavirus HKU18	HKU18-chu3	HKU18-chu3	magpie-robin	Passeriformes	Muscicapidae	Copsychus	Copsychus saularis		Coronaviridae	Orthocoronavirinae	Deltacoronavirus	Buldecovirus	Deltacoronavirus_lonchurae	MunCV_HKU13	Delta_HKU13
Public database	MT138107		26258	complete genome		2018				anal swab	Deltacoronavirus sp.	lrf178cor1	lrf178cor1					待确认		Coronaviridae	Orthocoronavirinae	Deltacoronavirus	Buldecovirus	Deltacoronavirus_lonchurae	MunCV_HKU13	Delta_HKU13
Public database	MT138108		26528	complete genome		2018				anal swab	Deltacoronavirus sp.	rub035cor1	rub035cor1					待确认		Coronaviridae	Orthocoronavirinae	Deltacoronavirus	Buldecovirus	Deltacoronavirus_lonchurae	MunCV_HKU13	Delta_HKU13
Public database	MT138104		26463	complete genome		2018				anal swab	Deltacoronavirus sp.	brb027cor1	brb027cor1					待确认		Coronaviridae	Orthocoronavirinae	Deltacoronavirus	Buldecovirus	Deltacoronavirus_lonchurae	MunCV_HKU13	Delta_HKU13
Public database	MT138105		26641	complete genome		2018				anal swab	Deltacoronavirus sp.	brb028cor1	brb028cor1					待确认		Coronaviridae	Orthocoronavirinae	Deltacoronavirus	Buldecovirus	Deltacoronavirus_lonchurae	MunCV_HKU13	Delta_HKU13
Public database	MT215336		25896	complete genome		2019-07-01	China	Qinghai		feces	Montifringilla taczanowskii coronavirus N	MtCoV N	MtCoV N	Montifringilla taczanowskii	Passeriformes	Passeridae	Montifringilla	Montifringilla taczanowskii		Coronaviridae	Orthocoronavirinae	Deltacoronavirus	Buldecovirus	Deltacoronavirus_suis	PoCoV_HKU15	Delta_HKU15
Public database	MT215337		25896	complete genome		2019-07-01	China	Qinghai		feces	Montifringilla taczanowskii coronavirus HM	MtCoV HM	MtCoV HM	Marmota himalayana	Rodentia	Sciuridae	Marmota	Marmota himalayana		Coronaviridae	Orthocoronavirinae	Deltacoronavirus	Buldecovirus	Deltacoronavirus_suis	PoCoV_HKU15	Delta_HKU15
Public database	KP965434		376	partial, RdRp		2009	Brazil			cloacal swab	Deltacoronavirus B04	B04	B04	Amazona vinacea	Psittaciformes	Psittacidae	Amazona	Amazona vinacea		Coronaviridae	Orthocoronavirinae	Deltacoronavirus	Buldecovirus	Deltacoronavirus_suis	PoCoV_HKU15	Delta_HKU15
Public database	MG812377		25710	complete genome		2017	USA	IL		fecal sample	Sparrow deltacoronavirus	ISU42824		sparrow	Passeriformes	Passeridae	Passer	Passer montanus		Coronaviridae	Orthocoronavirinae	Deltacoronavirus	Buldecovirus	Deltacoronavirus_suis	PoCoV_HKU15	Delta_HKU15
Public database	MG812378		25685	complete genome		2017	USA	MN		fecal sample	Sparrow deltacoronavirus	ISU73347		sparrow	Passeriformes	Passeridae	Passer	Passer montanus		Coronaviridae	Orthocoronavirinae	Deltacoronavirus	Buldecovirus	Deltacoronavirus_suis	PoCoV_HKU15	Delta_HKU15
Public database	MG812375		25795	complete genome		2017	USA	IL		fecal sample	Sparrow deltacoronavirus	ISU690-4		sparrow	Passeriformes	Passeridae	Passer	Passer montanus		Coronaviridae	Orthocoronavirinae	Deltacoronavirus	Buldecovirus	Deltacoronavirus_suis	PoCoV_HKU15	Delta_HKU15
Public database	MG812376		25796	complete genome		2017	USA	IL		fecal sample	Sparrow deltacoronavirus	ISU690-7		sparrow	Passeriformes	Passeridae	Passer	Passer montanus		Coronaviridae	Orthocoronavirinae	Deltacoronavirus	Buldecovirus	Deltacoronavirus_suis	PoCoV_HKU15	Delta_HKU15
Public database	MH532440		25881	complete genome		2015-03-03	Poland				Quail deltacoronavirus			Coturnix japonica	Galliformes	Phasianidae	Coturnix	Coturnix japonica	yes	Coronaviridae	Orthocoronavirinae	Deltacoronavirus	Buldecovirus	Deltacoronavirus_suis	PoCoV_HKU15	Delta_HKU15
Public database	LC364345		25874	complete genome		2013-06-23	United Arab Emirates	Dubai		fecal sample	Quail coronavirus UAE-HKU30			Galliformes sp. (Quail)	Galliformes	Phasianidae	Coturnix	Coturnix coturnix	yes	Coronaviridae	Orthocoronavirinae	Deltacoronavirus	Buldecovirus	Deltacoronavirus_suis	PoCoV_HKU15	Delta_HKU15
Public database	LC364346		25871	complete genome		2014-02-19	United Arab Emirates	Dubai		fecal sample	Quail coronavirus UAE-HKU30			Galliformes sp. (Quail)	Galliformes	Phasianidae	Coturnix	Coturnix coturnix	yes	Coronaviridae	Orthocoronavirinae	Deltacoronavirus	Buldecovirus	Deltacoronavirus_suis	PoCoV_HKU15	Delta_HKU15
Public database	KX077968		393	partial, RdRp		2015	Italy	NA	NA	cloacal swab	Deltacoronavirus sp.	Quail22F1	Quail32F4	Coturnix coturnix	Galliformes	Phasianidae	Coturnix	Coturnix coturnix	yes	Coronaviridae	Orthocoronavirinae	Deltacoronavirus	Buldecovirus	Deltacoronavirus_suis	PoCoV_HKU15	Delta_HKU15
Public database	KX077967		393	partial, RdRp		2015	Italy	NA	NA	cloacal swab	Deltacoronavirus sp.	Quail21F1	Quail32F4	Coturnix coturnix	Galliformes	Phasianidae	Coturnix	Coturnix coturnix	yes	Coronaviridae	Orthocoronavirinae	Deltacoronavirus	Buldecovirus	Deltacoronavirus_suis	PoCoV_HKU15	Delta_HKU15
Public database	KX077969		390	partial, RdRp		2015	Italy	NA	NA	cloacal swab	Deltacoronavirus sp.	Quail38F1	Quail32F4	Coturnix coturnix	Galliformes	Phasianidae	Coturnix	Coturnix coturnix	yes	Coronaviridae	Orthocoronavirinae	Deltacoronavirus	Buldecovirus	Deltacoronavirus_suis	PoCoV_HKU15	Delta_HKU15
Public database	KX077965		393	partial, RdRp		2015	Italy	NA	NA	cloacal swab	Deltacoronavirus sp.	Quail01F1	Quail32F4	Coturnix coturnix	Galliformes	Phasianidae	Coturnix	Coturnix coturnix	yes	Coronaviridae	Orthocoronavirinae	Deltacoronavirus	Buldecovirus	Deltacoronavirus_suis	PoCoV_HKU15	Delta_HKU15
Public database	KX077970		393	partial, RdRp		2015	Italy	NA	NA	cloacal swab	Deltacoronavirus sp.	Quail11F2	Quail32F4	Coturnix coturnix	Galliformes	Phasianidae	Coturnix	Coturnix coturnix	yes	Coronaviridae	Orthocoronavirinae	Deltacoronavirus	Buldecovirus	Deltacoronavirus_suis	PoCoV_HKU15	Delta_HKU15
Public database	KX077966		393	partial, RdRp		2015	Italy	NA	NA	cloacal swab	Deltacoronavirus sp.	Quail06F1	Quail32F4	Coturnix coturnix	Galliformes	Phasianidae	Coturnix	Coturnix coturnix	yes	Coronaviridae	Orthocoronavirinae	Deltacoronavirus	Buldecovirus	Deltacoronavirus_suis	PoCoV_HKU15	Delta_HKU15
Public database	KX077971		393	partial, RdRp		2015	Italy	NA	NA	cloacal swab	Deltacoronavirus sp.	Quail30F4	Quail32F4	Coturnix coturnix	Galliformes	Phasianidae	Coturnix	Coturnix coturnix	yes	Coronaviridae	Orthocoronavirinae	Deltacoronavirus	Buldecovirus	Deltacoronavirus_suis	PoCoV_HKU15	Delta_HKU15
Public database	KX077972		393	partial, RdRp		2015	Italy	NA	NA	cloacal swab	Deltacoronavirus sp.	Quail32F4	Quail32F4	Coturnix coturnix	Galliformes	Phasianidae	Coturnix	Coturnix coturnix	yes	Coronaviridae	Orthocoronavirinae	Deltacoronavirus	Buldecovirus	Deltacoronavirus_suis	PoCoV_HKU15	Delta_HKU15
Public database	OM480527		7154	partial genome		2020	China				Sparrow coronavirus HKU17	D20222/2/3/2012/RO		Porcupine	Artiodactyla	Suidae	Sus	Sus scrofa		Coronaviridae	Orthocoronavirinae	Deltacoronavirus	Buldecovirus	Deltacoronavirus_suis	PoCoV_HKU15	Delta_HKU15
Public database	OQ107243		573	partial, RdRp		2022-08-09	China	Shandong	Jining	feces	Deltacoronavirus sp.	BIME-WS31	BIME-WS31		Columbiformes	Columbidae	Columba	Columba livia		Coronaviridae	Orthocoronavirinae	Deltacoronavirus	Buldecovirus	Deltacoronavirus_suis	PoCoV_HKU15	Delta_HKU15
Public database	OQ102159		25937	complete genome		2022-08-09	China	Shandong	Jining	drinking water	Deltacoronavirus sp.	BIME-WS38	BIME-WS38		Columbiformes	Columbidae	Columba	Columba livia		Coronaviridae	Orthocoronavirinae	Deltacoronavirus	Buldecovirus	Deltacoronavirus_suis	PoCoV_HKU15	Delta_HKU15
Public database	OQ107244		573	partial, RdRp		2022-08-09	China	Shandong	Jining	drinking water	Deltacoronavirus sp.	BIME-WS38	BIME-WS38		Columbiformes	Columbidae	Columba	Columba livia		Coronaviridae	Orthocoronavirinae	Deltacoronavirus	Buldecovirus	Deltacoronavirus_suis	PoCoV_HKU15	Delta_HKU15
Public database	JQ065045		26083	complete genome		2007	China	Hong Kong		tracheal, rectal, and cloacal swabs and nasopharyngeal aspirates	Sparrow coronavirus HKU17	HKU17-6124	HKU17-6124	sparrow	Passeriformes	Passeridae	Passer	Passer montanus		Coronaviridae	Orthocoronavirinae	Deltacoronavirus	Buldecovirus	Deltacoronavirus_suis	PoCoV_HKU15	Delta_HKU15
Public database	NC_016992		26083	complete genome		2007	China	Hong Kong		tracheal, rectal, and cloacal swabs and nasopharyngeal aspirates	Sparrow coronavirus HKU17	HKU17-6124	HKU17-6124	sparrow	Passeriformes	Passeridae	Passer	Passer montanus		Coronaviridae	Orthocoronavirinae	Deltacoronavirus	Buldecovirus	Deltacoronavirus_suis	PoCoV_HKU15	Delta_HKU15
Public database	ON605855		379	partial, RdRp		2020	Russia				Deltacoronavirus sp.	AvCoV/hooded crow/YaNAO-Russia/M2139/2020	AvCoV/hooded crow/YaNAO-Russia/M2139/2020	hooded crow	Passeriformes	Corvidae	Corvus	Corvus cornix		Coronaviridae	Orthocoronavirinae	Deltacoronavirus	Buldecovirus	Deltacoronavirus_suis	PoCoV_HKU15	Delta_HKU15
Public database	MK617496		451	partial, RdRp		2009-11-13	Poland			Cloacal/fecal swab	Deltacoronavirus sp.	DeltaCoV/AvCoV/Pheasant/Poland/MW378B/2009	DeltaCoV/AvCoV/Pheasant/Poland/MW378B/2009	common pheasant	Galliformes	Phasianidae	Phasianus	Phasianus colchicus		Coronaviridae	Orthocoronavirinae	Deltacoronavirus	Buldecovirus	Deltacoronavirus_suis	PoCoV_HKU15	Delta_HKU15
Public database	OM642550		540	partial, RdRp		2019-12-14	South Korea			feces	Deltacoronavirus sp.	North pintail/South Korea/SW18/2019	North pintail/South Korea/SW18/2019	North pintail	Anseriformes	Anatidae	Anas	Anas acuta	yes	Coronaviridae	Orthocoronavirinae	Deltacoronavirus	Buldecovirus	Deltacoronavirus_suis	PoCoV_HKU15	Delta_HKU15
Public database	OM642551		540	partial, RdRp		2019-11-26	South Korea			feces	Deltacoronavirus sp.	Eastern spot-billed duck/South Korea/SW10/2019	Eastern spot-billed duck/South Korea/SW10/2019	Eastern spot-billed duck	Anseriformes	Anatidae	Anas	Anas zonorhyncha	yes	Coronaviridae	Orthocoronavirinae	Deltacoronavirus	Buldecovirus	Deltacoronavirus_suis	PoCoV_HKU15	Delta_HKU15
Public database	MW345814		26289	complete genome		Apr-2018/Jun-2018	China	Hunan	Changde and Yueyang	feces	Deltacoronavirus HNU1-1	HNU1-1	HNU1-1	common magpie	Passeriformes	Corvidae	Pica	Pica pica		Coronaviridae	Orthocoronavirinae	Deltacoronavirus	Buldecovirus	Deltacoronavirus_suis	PoCoV_HKU15	Delta_HKU15
Public database	MW345815		26289	complete genome		Apr-2018/Jun-2018	China	Hunan	Changde and Yueyang	feces	Deltacoronavirus HNU1-2	HNU1-2	HNU1-2	common magpie	Passeriformes	Corvidae	Pica	Pica pica		Coronaviridae	Orthocoronavirinae	Deltacoronavirus	Buldecovirus	Deltacoronavirus_suis	PoCoV_HKU15	Delta_HKU15
Public database	MW345816		26208	complete genome		Apr-2018/Jun-2018	China	Hunan	Changde and Yueyang	feces	Deltacoronavirus HNU3	HNU3	HNU3	common magpie	Passeriformes	Corvidae	Pica	Pica pica		Coronaviridae	Orthocoronavirinae	Deltacoronavirus	Buldecovirus	Deltacoronavirus_suis	PoCoV_HKU15	Delta_HKU15
Public database	MW349841		26240	complete genome		Apr-2018/Jun-2018	China	Hunan	Changde and Yueyang	feces	Deltacoronavirus HNU2	HNU2	HNU2	common magpie	Passeriformes	Corvidae	Pica	Pica pica		Coronaviridae	Orthocoronavirinae	Deltacoronavirus	Buldecovirus	Deltacoronavirus_suis	PoCoV_HKU15	Delta_HKU15
Public database	OM642549		369	partial, RdRp		2019-11-26	South Korea			feces	Deltacoronavirus sp.	Eastern spot-billed duck/South Korea/SW14/2019	Eastern spot-billed duck/South Korea/SW14/2019	Eastern spot-billed duck	Anseriformes	Anatidae	Anas	Anas zonorhyncha	yes	Coronaviridae	Orthocoronavirinae	Deltacoronavirus	Buldecovirus	Deltacoronavirus_suis	PoCoV_HKU15	Delta_HKU15
Public database	OM642553		540	partial, RdRp		2020-11-16	South Korea			feces	Deltacoronavirus sp.	Eurasian teal/South Korea/SW21/2020	Eurasian teal/South Korea/SW21/2020	Eurasian teal	Anseriformes	Anatidae	Anas	Anas crecca	yes	Coronaviridae	Orthocoronavirinae	Deltacoronavirus	Buldecovirus	Deltacoronavirus_suis	PoCoV_HKU15	Delta_HKU15
Public database	OM642552		540	partial, RdRp		2020-11-16	South Korea			feces	Deltacoronavirus sp.	Eastern spot-billed duck/South Korea/SW19/2020	Eastern spot-billed duck/South Korea/SW19/2020	Eastern spot-billed duck	Anseriformes	Anatidae	Anas	Anas zonorhyncha	yes	Coronaviridae	Orthocoronavirinae	Deltacoronavirus	Buldecovirus	Deltacoronavirus_suis	PoCoV_HKU15	Delta_HKU15
Public database	OM642554		540	partial, RdRp		2020-11-16	South Korea			feces	Deltacoronavirus sp.	Eastern spot-billed duck/South Korea/SW22/2020	Eastern spot-billed duck/South Korea/SW22/2020	Eastern spot-billed duck	Anseriformes	Anatidae	Anas	Anas zonorhyncha	yes	Coronaviridae	Orthocoronavirinae	Deltacoronavirus	Buldecovirus	Deltacoronavirus_suis	PoCoV_HKU15	Delta_HKU15
Public database	OM642555		540	partial, RdRp		2020-11-09	South Korea			feces	Deltacoronavirus sp.	Mallard/South Korea/SW11/2020	Mallard/South Korea/SW11/2020	Mallard	Anseriformes	Anatidae	Anas	Anas platyrhynchos	yes	Coronaviridae	Orthocoronavirinae	Deltacoronavirus	Buldecovirus	Deltacoronavirus_suis	PoCoV_HKU15	Delta_HKU15
Public database	MZ802777		25406	complete genome		2016-05-01	Thailand			piglet small intestine	Porcine deltacoronavirus	RBR	RBR	Sus scrofa	Artiodactyla	Suidae	Sus	Sus scrofa		Coronaviridae	Orthocoronavirinae	Deltacoronavirus	Buldecovirus	Deltacoronavirus_suis	PoCoV_HKU15	Delta_HKU15
Public database	KX361343		25406	complete genome		2013-02-01	Thailand			intestine	Porcine deltacoronavirus	P1_13_ST1_0213/PDCoV/0213/Thailand	P1_13_ST1_0213/PDCoV/0213/Thailand	pig	Artiodactyla	Suidae	Sus	Sus scrofa		Coronaviridae	Orthocoronavirinae	Deltacoronavirus	Buldecovirus	Deltacoronavirus_suis	PoCoV_HKU15	Delta_HKU15
Public database	KX361344		25406	complete genome		2013-03-01	Thailand			intestine	Porcine deltacoronavirus	P2_13_ST2_0313/PDCoV/0213/Thailand	P2_13_ST2_0313/PDCoV/0213/Thailand	pig	Artiodactyla	Suidae	Sus	Sus scrofa		Coronaviridae	Orthocoronavirinae	Deltacoronavirus	Buldecovirus	Deltacoronavirus_suis	PoCoV_HKU15	Delta_HKU15
Public database	MZ802772		25406	complete genome		2016-09-01	Thailand			piglet small intestine	Porcine deltacoronavirus	CBR	CBR	Sus scrofa	Artiodactyla	Suidae	Sus	Sus scrofa		Coronaviridae	Orthocoronavirinae	Deltacoronavirus	Buldecovirus	Deltacoronavirus_suis	PoCoV_HKU15	Delta_HKU15
Public database	MZ802773		25406	complete genome		2016-09-01	Thailand			piglet small intestine	Porcine deltacoronavirus	CBR	CBR	Sus scrofa	Artiodactyla	Suidae	Sus	Sus scrofa		Coronaviridae	Orthocoronavirinae	Deltacoronavirus	Buldecovirus	Deltacoronavirus_suis	PoCoV_HKU15	Delta_HKU15
Public database	MZ802774		25406	complete genome		2016-09-01	Thailand			piglet small intestine	Porcine deltacoronavirus	CBR	CBR	Sus scrofa	Artiodactyla	Suidae	Sus	Sus scrofa		Coronaviridae	Orthocoronavirinae	Deltacoronavirus	Buldecovirus	Deltacoronavirus_suis	PoCoV_HKU15	Delta_HKU15
Public database	KX361345		25406	complete genome		2015-12-01	Thailand			intestine	Porcine deltacoronavirus	P24_15_NT1_1215/PDCoV/2015/Thailand	P24_15_NT1_1215/PDCoV/2015/Thailand	pig	Artiodactyla	Suidae	Sus	Sus scrofa		Coronaviridae	Orthocoronavirinae	Deltacoronavirus	Buldecovirus	Deltacoronavirus_suis	PoCoV_HKU15	Delta_HKU15
Public database	KU051641		25405	complete genome		2015-07-13	Thailand	the eastern province of Thailand	NA	feces	Porcine deltacoronavirus	PDCoV/Swine/Thailand/S5011/2015	PDCoV/Swine/Thailand/S5025/2015	pig	Artiodactyla	Suidae	Sus	Sus scrofa		Coronaviridae	Orthocoronavirinae	Deltacoronavirus	Buldecovirus	Deltacoronavirus_suis	PoCoV_HKU15	Delta_HKU15
Public database	KU051649		25405	complete genome		2015-07-13	Thailand	the eastern province of Thailand	NA	feces	Porcine deltacoronavirus	PDCoV/Swine/Thailand/S5015L/2015	PDCoV/Swine/Thailand/S5025/2015	pig	Artiodactyla	Suidae	Sus	Sus scrofa		Coronaviridae	Orthocoronavirinae	Deltacoronavirus	Buldecovirus	Deltacoronavirus_suis	PoCoV_HKU15	Delta_HKU15
Public database	KU984334		25403	complete genome		2015-11-01	Thailand	NA	NA	intestine	Porcine deltacoronavirus	TT_1115	TT_1115	pig	Artiodactyla	Suidae	Sus	Sus scrofa		Coronaviridae	Orthocoronavirinae	Deltacoronavirus	Buldecovirus	Deltacoronavirus_suis	PoCoV_HKU15	Delta_HKU15
Public database	KX118627		25405	complete genome		2016-01-20	Laos	Khammouane	NA	small intestine	Porcine deltacoronavirus	P1_16_BTL_0115/PDCoV/2016/Lao	P1_16_BTL_0115/PDCoV/2016/Lao	pig	Artiodactyla	Suidae	Sus	Sus scrofa		Coronaviridae	Orthocoronavirinae	Deltacoronavirus	Buldecovirus	Deltacoronavirus_suis	PoCoV_HKU15	Delta_HKU15
Public database	MZ802775		25406	complete genome		2016-01-01	Thailand			piglet small intestine	Porcine deltacoronavirus	NKP	NKP	Sus scrofa	Artiodactyla	Suidae	Sus	Sus scrofa		Coronaviridae	Orthocoronavirinae	Deltacoronavirus	Buldecovirus	Deltacoronavirus_suis	PoCoV_HKU15	Delta_HKU15
Public database	MZ802776		25406	complete genome		2016-03-01	Viet Nam			piglet small intestine	Porcine deltacoronavirus	VUT	VUT	Sus scrofa	Artiodactyla	Suidae	Sus	Sus scrofa		Coronaviridae	Orthocoronavirinae	Deltacoronavirus	Buldecovirus	Deltacoronavirus_suis	PoCoV_HKU15	Delta_HKU15
Public database	KX998969		25415	complete genome		2015-12-01	Viet Nam	Southern			Porcine deltacoronavirus	P29_15_VN_1215	P29_15_VN_1215	pig	Artiodactyla	Suidae	Sus	Sus scrofa		Coronaviridae	Orthocoronavirinae	Deltacoronavirus	Buldecovirus	Deltacoronavirus_suis	PoCoV_HKU15	Delta_HKU15
Public database	KX834351		25406	complete genome		2015-10-10	Viet Nam			feces	Porcine deltacoronavirus			piglet	Artiodactyla	Suidae	Sus	Sus scrofa		Coronaviridae	Orthocoronavirinae	Deltacoronavirus	Buldecovirus	Deltacoronavirus_suis	PoCoV_HKU15	Delta_HKU15
Public database	KX834352		25406	complete genome		2015-12-08	Viet Nam			feces	Porcine deltacoronavirus			pig	Artiodactyla	Suidae	Sus	Sus scrofa		Coronaviridae	Orthocoronavirinae	Deltacoronavirus	Buldecovirus	Deltacoronavirus_suis	PoCoV_HKU15	Delta_HKU15
Public database	MZ388471		25405	complete genome		2017-02-13	China	Guangxi		feces	Porcine deltacoronavirus	CH/GX/PDCoV/1491B/2017	CH/GX/PDCoV/1491B/2017	porcine	Artiodactyla	Suidae	Sus	Sus scrofa		Coronaviridae	Orthocoronavirinae	Deltacoronavirus	Buldecovirus	Deltacoronavirus_suis	PoCoV_HKU15	Delta_HKU15
Public database	MZ388472		25405	complete genome		2017-03-03	China	Guangxi		intestine	Porcine deltacoronavirus	CH/GX/PDCoV/1539C/2017	CH/GX/PDCoV/1539C/2017	porcine	Artiodactyla	Suidae	Sus	Sus scrofa		Coronaviridae	Orthocoronavirinae	Deltacoronavirus	Buldecovirus	Deltacoronavirus_suis	PoCoV_HKU15	Delta_HKU15
Public database	MZ388474		25398	complete genome		2018-04-03	China	Guangxi		intestine	Porcine deltacoronavirus	CH/GX/PDCoV/2081/2018	CH/GX/PDCoV/2081/2018	porcine	Artiodactyla	Suidae	Sus	Sus scrofa		Coronaviridae	Orthocoronavirinae	Deltacoronavirus	Buldecovirus	Deltacoronavirus_suis	PoCoV_HKU15	Delta_HKU15
Public database	MZ388469		25393	complete genome		2016-12-19	China	Guangxi		intestine	Porcine deltacoronavirus	CH/GX/PDCoV/1423/2016	CH/GX/PDCoV/1423/2016	porcine	Artiodactyla	Suidae	Sus	Sus scrofa		Coronaviridae	Orthocoronavirinae	Deltacoronavirus	Buldecovirus	Deltacoronavirus_suis	PoCoV_HKU15	Delta_HKU15
Public database	MZ388470		25405	complete genome		2017-01-22	China	Guangxi		feces	Porcine deltacoronavirus	CH/GX/PDCoV/1472A/2017	CH/GX/PDCoV/1472A/2017	porcine	Artiodactyla	Suidae	Sus	Sus scrofa		Coronaviridae	Orthocoronavirinae	Deltacoronavirus	Buldecovirus	Deltacoronavirus_suis	PoCoV_HKU15	Delta_HKU15
Public database	MZ388473		25382	complete genome		2018-02-06	China	Guangxi		intestine	Porcine deltacoronavirus	CH/GX/PDCoV/1988A/2018	CH/GX/PDCoV/1988A/2018	porcine	Artiodactyla	Suidae	Sus	Sus scrofa		Coronaviridae	Orthocoronavirinae	Deltacoronavirus	Buldecovirus	Deltacoronavirus_suis	PoCoV_HKU15	Delta_HKU15
Public database	MN025260		25399	complete genome		2017-01-18	China	Guangxi		intestinal content	Porcine deltacoronavirus			porcine	Artiodactyla	Suidae	Sus	Sus scrofa		Coronaviridae	Orthocoronavirinae	Deltacoronavirus	Buldecovirus	Deltacoronavirus_suis	PoCoV_HKU15	Delta_HKU15
Public database	MN173779		25406	complete genome		2018	China				Porcine deltacoronavirus	CHN-GX11-2018	CHN-GX11-2018		Artiodactyla	Suidae	Sus	Sus scrofa		Coronaviridae	Orthocoronavirinae	Deltacoronavirus	Buldecovirus	Deltacoronavirus_suis	PoCoV_HKU15	Delta_HKU15
Public database	MN173781		25408	complete genome		2018	China				Porcine deltacoronavirus	CHN-GX81-2018	CHN-GX81-2018		Artiodactyla	Suidae	Sus	Sus scrofa		Coronaviridae	Orthocoronavirinae	Deltacoronavirus	Buldecovirus	Deltacoronavirus_suis	PoCoV_HKU15	Delta_HKU15
Public database	MN173780		25406	complete genome		2018	China				Porcine deltacoronavirus	CHN-GX12-2018	CHN-GX12-2018		Artiodactyla	Suidae	Sus	Sus scrofa		Coronaviridae	Orthocoronavirinae	Deltacoronavirus	Buldecovirus	Deltacoronavirus_suis	PoCoV_HKU15	Delta_HKU15
Public database	MK359104		25406	complete genome		2018	China				Porcine deltacoronavirus	CHN-GX01-2018	CHN-GX01-2018	pig	Artiodactyla	Suidae	Sus	Sus scrofa		Coronaviridae	Orthocoronavirinae	Deltacoronavirus	Buldecovirus	Deltacoronavirus_suis	PoCoV_HKU15	Delta_HKU15
Public database	MN173782		25406	complete genome		2018	China				Porcine deltacoronavirus	CHN-GX09-2018	CHN-GX09-2018		Artiodactyla	Suidae	Sus	Sus scrofa		Coronaviridae	Orthocoronavirinae	Deltacoronavirus	Buldecovirus	Deltacoronavirus_suis	PoCoV_HKU15	Delta_HKU15
Public database	MN520193		25406	complete genome		2018	China	Anhui			Porcine deltacoronavirus	AH2018-81	AH2018-81		Artiodactyla	Suidae	Sus	Sus scrofa		Coronaviridae	Orthocoronavirinae	Deltacoronavirus	Buldecovirus	Deltacoronavirus_suis	PoCoV_HKU15	Delta_HKU15
Public database	MN520199		25397	complete genome		2018	China	Anhui			Porcine deltacoronavirus	AH2018-93	AH2018-93		Artiodactyla	Suidae	Sus	Sus scrofa		Coronaviridae	Orthocoronavirinae	Deltacoronavirus	Buldecovirus	Deltacoronavirus_suis	PoCoV_HKU15	Delta_HKU15
Public database	MN520200		25404	complete genome		2018	China	Anhui			Porcine deltacoronavirus	AH2018-94	AH2018-94		Artiodactyla	Suidae	Sus	Sus scrofa		Coronaviridae	Orthocoronavirinae	Deltacoronavirus	Buldecovirus	Deltacoronavirus_suis	PoCoV_HKU15	Delta_HKU15
Public database	MF948005		25423	complete genome		2017-08-10	China				Porcine deltacoronavirus			porcine	Artiodactyla	Suidae	Sus	Sus scrofa		Coronaviridae	Orthocoronavirinae	Deltacoronavirus	Buldecovirus	Deltacoronavirus_suis	PoCoV_HKU15	Delta_HKU15
Public database	JQ065042		25430	complete genome		2009	China	Hong Kong		Tracheal, rectal, and cloacal swabs	Porcine coronavirus HKU15	MI6148		pig	Artiodactyla	Suidae	Sus	Sus scrofa		Coronaviridae	Orthocoronavirinae	Deltacoronavirus	Buldecovirus	Deltacoronavirus_suis	PoCoV_HKU15	Delta_HKU15
Public database	KT021234		25419	complete genome		2015-03-20	China	Shanxi	NA	faecal and intestinal samples	Porcine deltacoronavirus	CH/SXD1/2015	CH/SXD1/2015	porcine	Artiodactyla	Suidae	Sus	Sus scrofa		Coronaviridae	Orthocoronavirinae	Deltacoronavirus	Buldecovirus	Deltacoronavirus_suis	PoCoV_HKU15	Delta_HKU15
Public database	ON494594		25389	complete genome		2018-02-15	China				Porcine deltacoronavirus	CHN-SF-2018	CHN-SF-2018	Sus scrofa	Artiodactyla	Suidae	Sus	Sus scrofa		Coronaviridae	Orthocoronavirinae	Deltacoronavirus	Buldecovirus	Deltacoronavirus_suis	PoCoV_HKU15	Delta_HKU15
Public database	MN249445		25424	complete genome		2017-12-11	China			feces	Porcine deltacoronavirus	CHN-JS-2017	CHN-JS-2017	Sus scrofa	Artiodactyla	Suidae	Sus	Sus scrofa		Coronaviridae	Orthocoronavirinae	Deltacoronavirus	Buldecovirus	Deltacoronavirus_suis	PoCoV_HKU15	Delta_HKU15
Public database	OQ790129		25389	complete genome		2018-11-03	China				Porcine deltacoronavirus	PDCoV-SN-Swine-2018	PDCoV-SN-Swine-2018	Sus scrofa	Artiodactyla	Suidae	Sus	Sus scrofa		Coronaviridae	Orthocoronavirinae	Deltacoronavirus	Buldecovirus	Deltacoronavirus_suis	PoCoV_HKU15	Delta_HKU15
Public database	KY293678		25438	complete genome		2016-05-23	China				Porcine deltacoronavirus	CH/JXJGS02/2016	CH/JXJGS02/2016	piglet	Artiodactyla	Suidae	Sus	Sus scrofa		Coronaviridae	Orthocoronavirinae	Deltacoronavirus	Buldecovirus	Deltacoronavirus_suis	PoCoV_HKU15	Delta_HKU15
Public database	MN520192		25419	complete genome		2018-08-01	China	Zhejiang			Porcine deltacoronavirus	ZJ2018-D	ZJ2018-D		Artiodactyla	Suidae	Sus	Sus scrofa		Coronaviridae	Orthocoronavirinae	Deltacoronavirus	Buldecovirus	Deltacoronavirus_suis	PoCoV_HKU15	Delta_HKU15
Public database	MK625641		25446	complete genome		2018-10-01	China				Porcine deltacoronavirus	CH/JXJGS01/2016	CH/JXJGS01/2016	swine	Artiodactyla	Suidae	Sus	Sus scrofa		Coronaviridae	Orthocoronavirinae	Deltacoronavirus	Buldecovirus	Deltacoronavirus_suis	PoCoV_HKU15	Delta_HKU15
Public database	KU981062		25420	complete genome		2015-12-30	China			small intestinal contents	Porcine deltacoronavirus	passage 10	passage 10		Artiodactyla	Suidae	Sus	Sus scrofa		Coronaviridae	Orthocoronavirinae	Deltacoronavirus	Buldecovirus	Deltacoronavirus_suis	PoCoV_HKU15	Delta_HKU15
Public database	MH025762		25438	complete genome		2016	China	Jiangxi	NA	feces	Porcine deltacoronavirus	CH/JXJGS01/P7	CH/JXJGS01/P50	swine	Artiodactyla	Suidae	Sus	Sus scrofa		Coronaviridae	Orthocoronavirinae	Deltacoronavirus	Buldecovirus	Deltacoronavirus_suis	PoCoV_HKU15	Delta_HKU15
Public database	MH025763		25438	complete genome		2016	China	Jiangxi	NA	feces	Porcine deltacoronavirus	CH/JXJGS01/P20	CH/JXJGS01/P50	swine	Artiodactyla	Suidae	Sus	Sus scrofa		Coronaviridae	Orthocoronavirinae	Deltacoronavirus	Buldecovirus	Deltacoronavirus_suis	PoCoV_HKU15	Delta_HKU15
Public database	MH025764		25438	complete genome		2016	China	Jiangxi	NA	feces	Porcine deltacoronavirus	CH/JXJGS01/P50	CH/JXJGS01/P50	swine	Artiodactyla	Suidae	Sus	Sus scrofa		Coronaviridae	Orthocoronavirinae	Deltacoronavirus	Buldecovirus	Deltacoronavirus_suis	PoCoV_HKU15	Delta_HKU15
Public database	MF095123		25399	complete genome		2017-02-15	China				Porcine deltacoronavirus	CHN-HG-2017	CHN-HG-2017	Sus scrofa	Artiodactyla	Suidae	Sus	Sus scrofa		Coronaviridae	Orthocoronavirinae	Deltacoronavirus	Buldecovirus	Deltacoronavirus_suis	PoCoV_HKU15	Delta_HKU15
Public database	MG242062		25414	complete genome		2017	China				Porcine deltacoronavirus	CHN-HeB1-2017	CHN-HeB1-2017	Sus scrofa	Artiodactyla	Suidae	Sus	Sus scrofa		Coronaviridae	Orthocoronavirinae	Deltacoronavirus	Buldecovirus	Deltacoronavirus_suis	PoCoV_HKU15	Delta_HKU15
Public database	MK355396		25403	complete genome		2016-02-20	China	Sichuan		feces	Porcine deltacoronavirus			Sus scrofa	Artiodactyla	Suidae	Sus	Sus scrofa		Coronaviridae	Orthocoronavirinae	Deltacoronavirus	Buldecovirus	Deltacoronavirus_suis	PoCoV_HKU15	Delta_HKU15
Public database	MN520194		25420	complete genome		2018-10-01	China	Shandong			Porcine deltacoronavirus	SD2018-10	SD2018-10		Artiodactyla	Suidae	Sus	Sus scrofa		Coronaviridae	Orthocoronavirinae	Deltacoronavirus	Buldecovirus	Deltacoronavirus_suis	PoCoV_HKU15	Delta_HKU15
Public database	MZ772936		25416	complete genome		2016	China			intestinal contents	Porcine deltacoronavirus	BN	BN	pig	Artiodactyla	Suidae	Sus	Sus scrofa		Coronaviridae	Orthocoronavirinae	Deltacoronavirus	Buldecovirus	Deltacoronavirus_suis	PoCoV_HKU15	Delta_HKU15
Public database	OP566509		25418	complete genome		2016	China				Porcine deltacoronavirus	vPDCoV YRQ/2016	vPDCoV YRQ/2016	swine	Artiodactyla	Suidae	Sus	Sus scrofa		Coronaviridae	Orthocoronavirinae	Deltacoronavirus	Buldecovirus	Deltacoronavirus_suis	PoCoV_HKU15	Delta_HKU15
Public database	MN942260		25418	complete genome		2015	China			fence	Porcine deltacoronavirus	PDcov HeN/swine/2015	PDcov HeN/swine/2015	swine	Artiodactyla	Suidae	Sus	Sus scrofa		Coronaviridae	Orthocoronavirinae	Deltacoronavirus	Buldecovirus	Deltacoronavirus_suis	PoCoV_HKU15	Delta_HKU15
Public database	OQ473581		25435	complete genome		2022	China			small intestinal contents	Porcine deltacoronavirus			Sus scrofa	Artiodactyla	Suidae	Sus	Sus scrofa		Coronaviridae	Orthocoronavirinae	Deltacoronavirus	Buldecovirus	Deltacoronavirus_suis	PoCoV_HKU15	Delta_HKU15
Public database	MF431743		25414	complete genome		2014	China			feces	Porcine deltacoronavirus			pig	Artiodactyla	Suidae	Sus	Sus scrofa		Coronaviridae	Orthocoronavirinae	Deltacoronavirus	Buldecovirus	Deltacoronavirus_suis	PoCoV_HKU15	Delta_HKU15
Public database	MK625638		25447	complete genome		2018-10-01	China				Porcine deltacoronavirus	CH/JXJGS01/2016	CH/JXJGS01/2016	swine	Artiodactyla	Suidae	Sus	Sus scrofa		Coronaviridae	Orthocoronavirinae	Deltacoronavirus	Buldecovirus	Deltacoronavirus_suis	PoCoV_HKU15	Delta_HKU15
Public database	MK625639		25438	complete genome		2018-10-01	China				Porcine deltacoronavirus	CH/JXJGS01/2016	CH/JXJGS01/2016	swine	Artiodactyla	Suidae	Sus	Sus scrofa		Coronaviridae	Orthocoronavirinae	Deltacoronavirus	Buldecovirus	Deltacoronavirus_suis	PoCoV_HKU15	Delta_HKU15
Public database	MK625640		25447	complete genome		2018-10-01	China				Porcine deltacoronavirus	CH/JXJGS01/2016	CH/JXJGS01/2016	swine	Artiodactyla	Suidae	Sus	Sus scrofa		Coronaviridae	Orthocoronavirinae	Deltacoronavirus	Buldecovirus	Deltacoronavirus_suis	PoCoV_HKU15	Delta_HKU15
Public database	KY293677		25438	complete genome		2016-05-23	China				Porcine deltacoronavirus	CH/JXJGS01/2016	CH/JXJGS01/2016	piglet	Artiodactyla	Suidae	Sus	Sus scrofa		Coronaviridae	Orthocoronavirinae	Deltacoronavirus	Buldecovirus	Deltacoronavirus_suis	PoCoV_HKU15	Delta_HKU15
Public database	KU981059		25420	complete genome		2015-02-16	China			small intestinal contents	Porcine deltacoronavirus			piglet	Artiodactyla	Suidae	Sus	Sus scrofa		Coronaviridae	Orthocoronavirinae	Deltacoronavirus	Buldecovirus	Deltacoronavirus_suis	PoCoV_HKU15	Delta_HKU15
Public database	KU981060		25420	complete genome		2015-04-15	China			small intestinal contents	Porcine deltacoronavirus	passage 0	passage 0		Artiodactyla	Suidae	Sus	Sus scrofa		Coronaviridae	Orthocoronavirinae	Deltacoronavirus	Buldecovirus	Deltacoronavirus_suis	PoCoV_HKU15	Delta_HKU15
Public database	KU981061		25420	complete genome		2015-07-18	China			small intestinal contents	Porcine deltacoronavirus	passage 5	passage 5		Artiodactyla	Suidae	Sus	Sus scrofa		Coronaviridae	Orthocoronavirinae	Deltacoronavirus	Buldecovirus	Deltacoronavirus_suis	PoCoV_HKU15	Delta_HKU15
Public database	OK649355		25443	complete genome		2017-12-17	China				Porcine deltacoronavirus	CHN-HA-2017	CHN-HA-2017	piglet	Artiodactyla	Suidae	Sus	Sus scrofa		Coronaviridae	Orthocoronavirinae	Deltacoronavirus	Buldecovirus	Deltacoronavirus_suis	PoCoV_HKU15	Delta_HKU15
Public database	KP757890		25420	complete genome		2004-05-24	China	Anhui		pig intestines	Porcine deltacoronavirus	CHN-AH-2004	CHN-AH-2004	pig	Artiodactyla	Suidae	Sus	Sus scrofa		Coronaviridae	Orthocoronavirinae	Deltacoronavirus	Buldecovirus	Deltacoronavirus_suis	PoCoV_HKU15	Delta_HKU15
Public database	LC260042		25362	complete genome		2014-03-01	Japan	Miyazaki		fecal sample	Porcine deltacoronavirus	RNA		Sus scrofa domesticus	Artiodactyla	Suidae	Sus	Sus scrofa		Coronaviridae	Orthocoronavirinae	Deltacoronavirus	Buldecovirus	Deltacoronavirus_suis	PoCoV_HKU15	Delta_HKU15
Public database	MF642324		25420	complete genome		2017-04-01	China	Gansu		feces	Porcine deltacoronavirus	CHN/GS/2017/1		Tibetan pig	Artiodactyla	Suidae	Sus	Sus scrofa		Coronaviridae	Orthocoronavirinae	Deltacoronavirus	Buldecovirus	Deltacoronavirus_suis	PoCoV_HKU15	Delta_HKU15
Public database	MF642322		25420	complete genome		2016-08-01	China	Gansu		feces	Porcine deltacoronavirus	CHN/GS/2016/1		Tibetan pig	Artiodactyla	Suidae	Sus	Sus scrofa		Coronaviridae	Orthocoronavirinae	Deltacoronavirus	Buldecovirus	Deltacoronavirus_suis	PoCoV_HKU15	Delta_HKU15
Public database	MF642325		25420	complete genome		2017-03-01	China	Qinghai		feces	Porcine deltacoronavirus	CHN/QH/2017/1		Tibetan pig	Artiodactyla	Suidae	Sus	Sus scrofa		Coronaviridae	Orthocoronavirinae	Deltacoronavirus	Buldecovirus	Deltacoronavirus_suis	PoCoV_HKU15	Delta_HKU15
Public database	MF642323		25420	complete genome		2016-08-01	China	Gansu		feces	Porcine deltacoronavirus	CHN/GS/2016/2		Tibetan pig	Artiodactyla	Suidae	Sus	Sus scrofa		Coronaviridae	Orthocoronavirinae	Deltacoronavirus	Buldecovirus	Deltacoronavirus_suis	PoCoV_HKU15	Delta_HKU15
Public database	KP757891		25420	complete genome		2014-12-26	China	Hubei		pig feces	Porcine deltacoronavirus	CHN-HB-2014	CHN-HB-2014	pig	Artiodactyla	Suidae	Sus	Sus scrofa		Coronaviridae	Orthocoronavirinae	Deltacoronavirus	Buldecovirus	Deltacoronavirus_suis	PoCoV_HKU15	Delta_HKU15
Public database	KP757892		25420	complete genome		2014-12-20	China	Jiangsu		pig feces	Porcine deltacoronavirus	CHN-JS-2014	CHN-JS-2014	pig	Artiodactyla	Suidae	Sus	Sus scrofa		Coronaviridae	Orthocoronavirinae	Deltacoronavirus	Buldecovirus	Deltacoronavirus_suis	PoCoV_HKU15	Delta_HKU15
Public database	MT263013		25396	complete genome		2017	China				Porcine deltacoronavirus	CHN-HN-17	CHN-HN-17	swine	Artiodactyla	Suidae	Sus	Sus scrofa		Coronaviridae	Orthocoronavirinae	Deltacoronavirus	Buldecovirus	Deltacoronavirus_suis	PoCoV_HKU15	Delta_HKU15
Public database	OQ736717		25360	complete genome		2021	China				Porcine deltacoronavirus	PDCoV-GX2022-1	PDCoV-GX2022-1	swine	Artiodactyla	Suidae	Sus	Sus scrofa		Coronaviridae	Orthocoronavirinae	Deltacoronavirus	Buldecovirus	Deltacoronavirus_suis	PoCoV_HKU15	Delta_HKU15
Public database	KU665558		25370	complete genome		2014-06-26	China			pig fecal sample	Porcine deltacoronavirus				Artiodactyla	Suidae	Sus	Sus scrofa		Coronaviridae	Orthocoronavirinae	Deltacoronavirus	Buldecovirus	Deltacoronavirus_suis	PoCoV_HKU15	Delta_HKU15
Public database	MF041982		25414	complete genome		2016-12-23	China				Porcine deltacoronavirus			pig	Artiodactyla	Suidae	Sus	Sus scrofa		Coronaviridae	Orthocoronavirinae	Deltacoronavirus	Buldecovirus	Deltacoronavirus_suis	PoCoV_HKU15	Delta_HKU15
Public database	KR131621		25438	complete genome		2015-03-01	China				Porcine deltacoronavirus	PDCoV/CHJXNI2/2015	PDCoV/CHJXNI2/2015	pig	Artiodactyla	Suidae	Sus	Sus scrofa		Coronaviridae	Orthocoronavirinae	Deltacoronavirus	Buldecovirus	Deltacoronavirus_suis	PoCoV_HKU15	Delta_HKU15
Public database	MH708123		25453	complete genome		2018-03-20	China				Porcine deltacoronavirus			pig	Artiodactyla	Suidae	Sus	Sus scrofa		Coronaviridae	Orthocoronavirinae	Deltacoronavirus	Buldecovirus	Deltacoronavirus_suis	PoCoV_HKU15	Delta_HKU15
Public database	MH708124		25454	complete genome		2018-03-20	China				Porcine deltacoronavirus			pig	Artiodactyla	Suidae	Sus	Sus scrofa		Coronaviridae	Orthocoronavirinae	Deltacoronavirus	Buldecovirus	Deltacoronavirus_suis	PoCoV_HKU15	Delta_HKU15
Public database	MH708125		25453	complete genome		2018-03-20	China				Porcine deltacoronavirus			pig	Artiodactyla	Suidae	Sus	Sus scrofa		Coronaviridae	Orthocoronavirinae	Deltacoronavirus	Buldecovirus	Deltacoronavirus_suis	PoCoV_HKU15	Delta_HKU15
Public database	MN520190		25417	complete genome		2018-03-01	China	Anhui			Porcine deltacoronavirus	AH2018-322	AH2018-322		Artiodactyla	Suidae	Sus	Sus scrofa		Coronaviridae	Orthocoronavirinae	Deltacoronavirus	Buldecovirus	Deltacoronavirus_suis	PoCoV_HKU15	Delta_HKU15
Public database	MN520203		25423	complete genome		2018-11-01	China	Guangxi			Porcine deltacoronavirus	GX2018-1	GX2018-1		Artiodactyla	Suidae	Sus	Sus scrofa		Coronaviridae	Orthocoronavirinae	Deltacoronavirus	Buldecovirus	Deltacoronavirus_suis	PoCoV_HKU15	Delta_HKU15
Public database	ON382562		25418	complete genome		2021-06-10	China				Porcine deltacoronavirus	HNZK-02 P100	HNZK-02 P100	pig	Artiodactyla	Suidae	Sus	Sus scrofa		Coronaviridae	Orthocoronavirinae	Deltacoronavirus	Buldecovirus	Deltacoronavirus_suis	PoCoV_HKU15	Delta_HKU15
Public database	ON402372		25689	complete genome		2020-01-11	China				Porcine deltacoronavirus	HNZK-02-P60	HNZK-02-P60	pig	Artiodactyla	Suidae	Sus	Sus scrofa		Coronaviridae	Orthocoronavirinae	Deltacoronavirus	Buldecovirus	Deltacoronavirus_suis	PoCoV_HKU15	Delta_HKU15
Public database	MT260149		25520	complete genome		2018-05-25	China				Porcine deltacoronavirus	HNZK-02-P5	HNZK-02-P5	swine	Artiodactyla	Suidae	Sus	Sus scrofa		Coronaviridae	Orthocoronavirinae	Deltacoronavirus	Buldecovirus	Deltacoronavirus_suis	PoCoV_HKU15	Delta_HKU15
Public database	MT260150		25453	complete genome		2018-06-05	China				Porcine deltacoronavirus	HNZK-02-P15	HNZK-02-P15	swine	Artiodactyla	Suidae	Sus	Sus scrofa		Coronaviridae	Orthocoronavirinae	Deltacoronavirus	Buldecovirus	Deltacoronavirus_suis	PoCoV_HKU15	Delta_HKU15
Public database	OR122653		25425	complete genome		2021-10-04	China				Porcine deltacoronavirus	HNZK-02-P120	HNZK-02-P120	pig	Artiodactyla	Suidae	Sus	Sus scrofa		Coronaviridae	Orthocoronavirinae	Deltacoronavirus	Buldecovirus	Deltacoronavirus_suis	PoCoV_HKU15	Delta_HKU15
Public database	OR122654		25425	complete genome		2022-10-20	China				Porcine deltacoronavirus	HNZK-02-P150	HNZK-02-P150	pig	Artiodactyla	Suidae	Sus	Sus scrofa		Coronaviridae	Orthocoronavirinae	Deltacoronavirus	Buldecovirus	Deltacoronavirus_suis	PoCoV_HKU15	Delta_HKU15
Public database	MG832584		25419	complete genome		2016-07-01	China			feces	Porcine deltacoronavirus	CHN-HN-1601	CHN-HN-1601	pig	Artiodactyla	Suidae	Sus	Sus scrofa		Coronaviridae	Orthocoronavirinae	Deltacoronavirus	Buldecovirus	Deltacoronavirus_suis	PoCoV_HKU15	Delta_HKU15
Public database	KX443143		25404	complete genome		2016	China				Porcine deltacoronavirus				Artiodactyla	Suidae	Sus	Sus scrofa		Coronaviridae	Orthocoronavirinae	Deltacoronavirus	Buldecovirus	Deltacoronavirus_suis	PoCoV_HKU15	Delta_HKU15
Public database	MN520209		25413	complete genome		2019-01-01	China	Jiangsu			Porcine deltacoronavirus	JS2019-A1414	JS2019-A1414		Artiodactyla	Suidae	Sus	Sus scrofa		Coronaviridae	Orthocoronavirinae	Deltacoronavirus	Buldecovirus	Deltacoronavirus_suis	PoCoV_HKU15	Delta_HKU15
Public database	OP792038		25424	complete genome		2020-12-01	China			feces	Porcine deltacoronavirus	PDCoV WH-A	PDCoV WH-A	Sus scrofa	Artiodactyla	Suidae	Sus	Sus scrofa		Coronaviridae	Orthocoronavirinae	Deltacoronavirus	Buldecovirus	Deltacoronavirus_suis	PoCoV_HKU15	Delta_HKU15
Public database	KY513724		25413	complete genome		2014	China	Hunan		fecal sample	Porcine deltacoronavirus			pig	Artiodactyla	Suidae	Sus	Sus scrofa		Coronaviridae	Orthocoronavirinae	Deltacoronavirus	Buldecovirus	Deltacoronavirus_suis	PoCoV_HKU15	Delta_HKU15
Public database	MN520204		25414	complete genome		2018-05-01	China	Henan			Porcine deltacoronavirus	HN2018-LH2	HN2018-LH2		Artiodactyla	Suidae	Sus	Sus scrofa		Coronaviridae	Orthocoronavirinae	Deltacoronavirus	Buldecovirus	Deltacoronavirus_suis	PoCoV_HKU15	Delta_HKU15
Public database	MH715491		25419	complete genome		2016	China				Porcine deltacoronavirus			swine	Artiodactyla	Suidae	Sus	Sus scrofa		Coronaviridae	Orthocoronavirinae	Deltacoronavirus	Buldecovirus	Deltacoronavirus_suis	PoCoV_HKU15	Delta_HKU15
Public database	MW854634		25418	complete genome		2015-06-01	China	Taiwan		small intestines	Porcine deltacoronavirus	104-553	104-553	pig	Artiodactyla	Suidae	Sus	Sus scrofa		Coronaviridae	Orthocoronavirinae	Deltacoronavirus	Buldecovirus	Deltacoronavirus_suis	PoCoV_HKU15	Delta_HKU15
Public database	MN520205		25420	complete genome		2019-03-01	China	Henan			Porcine deltacoronavirus	HN2019-C115	HN2019-C115		Artiodactyla	Suidae	Sus	Sus scrofa		Coronaviridae	Orthocoronavirinae	Deltacoronavirus	Buldecovirus	Deltacoronavirus_suis	PoCoV_HKU15	Delta_HKU15
Public database	MN520206		25419	complete genome		2019-03-01	China	Henan			Porcine deltacoronavirus	HN2019-C132	HN2019-C132		Artiodactyla	Suidae	Sus	Sus scrofa		Coronaviridae	Orthocoronavirinae	Deltacoronavirus	Buldecovirus	Deltacoronavirus_suis	PoCoV_HKU15	Delta_HKU15
Public database	MN520207		25406	complete genome		2018-10-01	China	Jiangsu			Porcine deltacoronavirus	JS2018-QF49	JS2018-QF49		Artiodactyla	Suidae	Sus	Sus scrofa		Coronaviridae	Orthocoronavirinae	Deltacoronavirus	Buldecovirus	Deltacoronavirus_suis	PoCoV_HKU15	Delta_HKU15
Public database	MN520208		25407	complete genome		2018-07-01	China	Jiangsu			Porcine deltacoronavirus	JS2018-YC15	JS2018-YC15		Artiodactyla	Suidae	Sus	Sus scrofa		Coronaviridae	Orthocoronavirinae	Deltacoronavirus	Buldecovirus	Deltacoronavirus_suis	PoCoV_HKU15	Delta_HKU15
Public database	KY363867		25396	complete genome		2016-03-18	China				Porcine deltacoronavirus	CHN-GD16-03	CHN-GD16-03	swine	Artiodactyla	Suidae	Sus	Sus scrofa		Coronaviridae	Orthocoronavirinae	Deltacoronavirus	Buldecovirus	Deltacoronavirus_suis	PoCoV_HKU15	Delta_HKU15
Public database	MW685622		25444	complete genome		2014-12-15	Haiti			plasma	Porcine deltacoronavirus	PDCoV/Haiti/Human/0081-4/2014	PDCoV/Haiti/Human/0081-4/2014	Homo sapiens	Primates	Hominidae	Homo	Homo sapiens		Coronaviridae	Orthocoronavirinae	Deltacoronavirus	Buldecovirus	Deltacoronavirus_suis	PoCoV_HKU15	Delta_HKU15
Public database	MW685624		25444	complete genome		2015-04-13	Haiti			plasma	Porcine deltacoronavirus	PDCoV/Haiti/Human/0329-4/2015	PDCoV/Haiti/Human/0329-4/2015	Homo sapiens	Primates	Hominidae	Homo	Homo sapiens		Coronaviridae	Orthocoronavirinae	Deltacoronavirus	Buldecovirus	Deltacoronavirus_suis	PoCoV_HKU15	Delta_HKU15
Public database	OQ736716		25355	complete genome		2022	China				Porcine deltacoronavirus	PDCoV-GX2022-2	PDCoV-GX2022-2	swine	Artiodactyla	Suidae	Sus	Sus scrofa		Coronaviridae	Orthocoronavirinae	Deltacoronavirus	Buldecovirus	Deltacoronavirus_suis	PoCoV_HKU15	Delta_HKU15
Public database	KY065120		25413	complete genome		2016	China	Tianjin		fecal samples	Porcine deltacoronavirus			porcine	Artiodactyla	Suidae	Sus	Sus scrofa		Coronaviridae	Orthocoronavirinae	Deltacoronavirus	Buldecovirus	Deltacoronavirus_suis	PoCoV_HKU15	Delta_HKU15
Public database	LC216914		25422	complete genome		2014-02-13	Hong Kong			nasopharynx	Coronavirus HKU15			Sus scrofa domesticus	Artiodactyla	Suidae	Sus	Sus scrofa		Coronaviridae	Orthocoronavirinae	Deltacoronavirus	Buldecovirus	Deltacoronavirus_suis	PoCoV_HKU15	Delta_HKU15
Public database	MN520201		25422	complete genome		2018	China	Guangdong			Porcine deltacoronavirus	GD2018-186	GD2018-186		Artiodactyla	Suidae	Sus	Sus scrofa		Coronaviridae	Orthocoronavirinae	Deltacoronavirus	Buldecovirus	Deltacoronavirus_suis	PoCoV_HKU15	Delta_HKU15
Public database	KY513725		25422	complete genome		2014	China	Jiangsu		fecal sample	Porcine deltacoronavirus			pig	Artiodactyla	Suidae	Sus	Sus scrofa		Coronaviridae	Orthocoronavirinae	Deltacoronavirus	Buldecovirus	Deltacoronavirus_suis	PoCoV_HKU15	Delta_HKU15
Public database	OQ551110		25458	complete genome		2018-02-27	China			intestine contents	Porcine deltacoronavirus	CHN-JS-2018	CHN-JS-2018	pig	Artiodactyla	Suidae	Sus	Sus scrofa		Coronaviridae	Orthocoronavirinae	Deltacoronavirus	Buldecovirus	Deltacoronavirus_suis	PoCoV_HKU15	Delta_HKU15
Public database	MN200481		25410	complete genome		2018	China	Shandong			Coronavirus HKU15	SD2018/300	SD2018/300	swine	Artiodactyla	Suidae	Sus	Sus scrofa		Coronaviridae	Orthocoronavirinae	Deltacoronavirus	Buldecovirus	Deltacoronavirus_suis	PoCoV_HKU15	Delta_HKU15
Public database	MN520195		25404	complete genome		2018-03-01	China	Shandong			Porcine deltacoronavirus	SD2018-304	SD2018-304		Artiodactyla	Suidae	Sus	Sus scrofa		Coronaviridae	Orthocoronavirinae	Deltacoronavirus	Buldecovirus	Deltacoronavirus_suis	PoCoV_HKU15	Delta_HKU15
Public database	MN520196		25404	complete genome		2018-03-01	China	Shandong			Porcine deltacoronavirus	SD2018-306	SD2018-306		Artiodactyla	Suidae	Sus	Sus scrofa		Coronaviridae	Orthocoronavirinae	Deltacoronavirus	Buldecovirus	Deltacoronavirus_suis	PoCoV_HKU15	Delta_HKU15
Public database	MN520197		25404	complete genome		2018-04-01	China	Shandong			Porcine deltacoronavirus	SD2018-4	SD2018-4		Artiodactyla	Suidae	Sus	Sus scrofa		Coronaviridae	Orthocoronavirinae	Deltacoronavirus	Buldecovirus	Deltacoronavirus_suis	PoCoV_HKU15	Delta_HKU15
Public database	MN520202		25421	complete genome		2018-05-01	China	Guangdong			Porcine deltacoronavirus	GD2018-1	GD2018-1		Artiodactyla	Suidae	Sus	Sus scrofa		Coronaviridae	Orthocoronavirinae	Deltacoronavirus	Buldecovirus	Deltacoronavirus_suis	PoCoV_HKU15	Delta_HKU15
Public database	MW685623		25447	complete genome		2015-03-16	Haiti			plasma	Porcine deltacoronavirus	PDCoV/Haiti/Human/0256-1/2015	PDCoV/Haiti/Human/0256-1/2015	Homo sapiens	Primates	Hominidae	Homo	Homo sapiens		Coronaviridae	Orthocoronavirinae	Deltacoronavirus	Buldecovirus	Deltacoronavirus_suis	PoCoV_HKU15	Delta_HKU15
Public database	KJ584355		25422	complete genome		2014-02-12	USA	Ohio		feces and intestine samples	Porcine coronavirus HKU15	OH11846		pig	Artiodactyla	Suidae	Sus	Sus scrofa		Coronaviridae	Orthocoronavirinae	Deltacoronavirus	Buldecovirus	Deltacoronavirus_suis	PoCoV_HKU15	Delta_HKU15
Public database	KR265856		25399	complete genome		2014-02-23	USA	Illinois			Porcine deltacoronavirus	USA/Illinois272/2014	USA/Illinois272/2014	pig	Artiodactyla	Suidae	Sus	Sus scrofa		Coronaviridae	Orthocoronavirinae	Deltacoronavirus	Buldecovirus	Deltacoronavirus_suis	PoCoV_HKU15	Delta_HKU15
Public database	KR265857		25394	complete genome		2014-02-23	USA	Illinois			Porcine deltacoronavirus	USA/Illinois273/2014	USA/Illinois273/2014	pig	Artiodactyla	Suidae	Sus	Sus scrofa		Coronaviridae	Orthocoronavirinae	Deltacoronavirus	Buldecovirus	Deltacoronavirus_suis	PoCoV_HKU15	Delta_HKU15
Public database	OR269935		25402	complete genome		2023-05-15	China			fence	Porcine deltacoronavirus	PDCoV/WH/2023	PDCoV/WH/2023	swine	Artiodactyla	Suidae	Sus	Sus scrofa		Coronaviridae	Orthocoronavirinae	Deltacoronavirus	Buldecovirus	Deltacoronavirus_suis	PoCoV_HKU15	Delta_HKU15
Public database	OQ790128		25402	complete genome		2023-02-15	China				Porcine deltacoronavirus	PDCoV-KQ-Swine-2023	PDCoV-KQ-Swine-2023	Sus scrofa	Artiodactyla	Suidae	Sus	Sus scrofa		Coronaviridae	Orthocoronavirinae	Deltacoronavirus	Buldecovirus	Deltacoronavirus_suis	PoCoV_HKU15	Delta_HKU15
Public database	OL900393		25340	complete genome		2021-04-02	China			sow feces	Porcine deltacoronavirus			pig	Artiodactyla	Suidae	Sus	Sus scrofa		Coronaviridae	Orthocoronavirinae	Deltacoronavirus	Buldecovirus	Deltacoronavirus_suis	PoCoV_HKU15	Delta_HKU15
Public database	OM047182		25381	complete genome		2021-04-02	China			sow feces	Porcine deltacoronavirus	CHN-SCMY2021-01	CHN-SCMY2021-01	pig	Artiodactyla	Suidae	Sus	Sus scrofa		Coronaviridae	Orthocoronavirinae	Deltacoronavirus	Buldecovirus	Deltacoronavirus_suis	PoCoV_HKU15	Delta_HKU15
Public database	KY926512		25419	complete genome		2016-11-01	South Korea	NA	NA	feces	Porcine deltacoronavirus	KNU16-11	KNU16-11	pig	Artiodactyla	Suidae	Sus	Sus scrofa		Coronaviridae	Orthocoronavirinae	Deltacoronavirus	Buldecovirus	Deltacoronavirus_suis	PoCoV_HKU15	Delta_HKU15
Public database	OQ718500		25422	complete genome		2022	South Korea	Gyeongsangbuk-do	NA	faecal and intestinal samples	Porcine deltacoronavirus	KPDCoV-2201	KPDCoV-2201	pig	Artiodactyla	Suidae	Sus	Sus scrofa		Coronaviridae	Orthocoronavirinae	Deltacoronavirus	Buldecovirus	Deltacoronavirus_suis	PoCoV_HKU15	Delta_HKU15
Public database	OK546242		25430	complete genome		2020	China	NA	NA		Porcine deltacoronavirus	CZ2020		pig	Artiodactyla	Suidae	Sus	Sus scrofa		Coronaviridae	Orthocoronavirinae	Deltacoronavirus	Buldecovirus	Deltacoronavirus_suis	PoCoV_HKU15	Delta_HKU15
Public database	OM256446		25403	complete genome		2021-11-01	China			rectum	Porcine deltacoronavirus			pig	Artiodactyla	Suidae	Sus	Sus scrofa		Coronaviridae	Orthocoronavirinae	Deltacoronavirus	Buldecovirus	Deltacoronavirus_suis	PoCoV_HKU15	Delta_HKU15
Public database	ON968724		25506	complete genome		2022-03-20	China	LiaoNing Province			Porcine deltacoronavirus	CH/LNFX/2022	CH/LNFX/2022	porcine	Artiodactyla	Suidae	Sus	Sus scrofa		Coronaviridae	Orthocoronavirinae	Deltacoronavirus	Buldecovirus	Deltacoronavirus_suis	PoCoV_HKU15	Delta_HKU15
Public database	MK211169		25393	complete genome		2017-12-24	China			small intestine	Porcine deltacoronavirus			porcine	Artiodactyla	Suidae	Sus	Sus scrofa		Coronaviridae	Orthocoronavirinae	Deltacoronavirus	Buldecovirus	Deltacoronavirus_suis	PoCoV_HKU15	Delta_HKU15
Public database	MK330604		25402	complete genome		2017-02-01	China			feces	Porcine deltacoronavirus			porcine	Artiodactyla	Suidae	Sus	Sus scrofa		Coronaviridae	Orthocoronavirinae	Deltacoronavirus	Buldecovirus	Deltacoronavirus_suis	PoCoV_HKU15	Delta_HKU15
Public database	MK993519		25380	complete genome		2019-01-01	China			small intestine	Porcine deltacoronavirus	CHN/Sichuan/2019	CHN/Sichuan/2019	porcine	Artiodactyla	Suidae	Sus	Sus scrofa		Coronaviridae	Orthocoronavirinae	Deltacoronavirus	Buldecovirus	Deltacoronavirus_suis	PoCoV_HKU15	Delta_HKU15
Public database	ON859973		25410	complete genome		2021-01-20	China				Porcine deltacoronavirus	JSYC-2021	JSYC-2021	swine	Artiodactyla	Suidae	Sus	Sus scrofa		Coronaviridae	Orthocoronavirinae	Deltacoronavirus	Buldecovirus	Deltacoronavirus_suis	PoCoV_HKU15	Delta_HKU15
Public database	LC216915		25406	complete genome		2014-02-13	Hong Kong			nasopharynx	Coronavirus HKU15			Sus scrofa domesticus	Artiodactyla	Suidae	Sus	Sus scrofa		Coronaviridae	Orthocoronavirinae	Deltacoronavirus	Buldecovirus	Deltacoronavirus_suis	PoCoV_HKU15	Delta_HKU15
Public database	MK572803		25403	complete genome		2017-06-01	China	Sichuan		feces	Porcine deltacoronavirus			Sus scrofa	Artiodactyla	Suidae	Sus	Sus scrofa		Coronaviridae	Orthocoronavirinae	Deltacoronavirus	Buldecovirus	Deltacoronavirus_suis	PoCoV_HKU15	Delta_HKU15
Public database	MT663769		25420	complete genome		2019-07-23	China			small intestinal contents	Porcine deltacoronavirus			Sus_scrofa	Artiodactyla	Suidae	Sus	Sus scrofa		Coronaviridae	Orthocoronavirinae	Deltacoronavirus	Buldecovirus	Deltacoronavirus_suis	PoCoV_HKU15	Delta_HKU15
Public database	MK005882		25414	complete genome		2018-03-01	China			small intestine	Porcine deltacoronavirus			porcine	Artiodactyla	Suidae	Sus	Sus scrofa		Coronaviridae	Orthocoronavirinae	Deltacoronavirus	Buldecovirus	Deltacoronavirus_suis	PoCoV_HKU15	Delta_HKU15
Public database	MK330605		25413	complete genome		2018-01-01	China			small intestine	Porcine deltacoronavirus			porcine	Artiodactyla	Suidae	Sus	Sus scrofa		Coronaviridae	Orthocoronavirinae	Deltacoronavirus	Buldecovirus	Deltacoronavirus_suis	PoCoV_HKU15	Delta_HKU15
Public database	KJ569769		25422	complete genome		2014-02-13	USA	Ohio		fecal samples and an intestine sample	Porcine coronavirus HKU15			pig	Artiodactyla	Suidae	Sus	Sus scrofa		Coronaviridae	Orthocoronavirinae	Deltacoronavirus	Buldecovirus	Deltacoronavirus_suis	PoCoV_HKU15	Delta_HKU15
Public database	OM777140		25392	complete genome		2021	China	Taiwan			Porcine deltacoronavirus			Pig	Artiodactyla	Suidae	Sus	Sus scrofa		Coronaviridae	Orthocoronavirinae	Deltacoronavirus	Buldecovirus	Deltacoronavirus_suis	PoCoV_HKU15	Delta_HKU15
Public database	MF431742		25420	complete genome		2015	China			feces	Porcine deltacoronavirus			pig	Artiodactyla	Suidae	Sus	Sus scrofa		Coronaviridae	Orthocoronavirinae	Deltacoronavirus	Buldecovirus	Deltacoronavirus_suis	PoCoV_HKU15	Delta_HKU15
Public database	MW816149		25420	complete genome		2018	China				Porcine deltacoronavirus			pig	Artiodactyla	Suidae	Sus	Sus scrofa		Coronaviridae	Orthocoronavirinae	Deltacoronavirus	Buldecovirus	Deltacoronavirus_suis	PoCoV_HKU15	Delta_HKU15
Public database	KY363868		25403	complete genome		2016-01-05	China				Porcine deltacoronavirus	CHN-GD16-05	CHN-GD16-05	swine	Artiodactyla	Suidae	Sus	Sus scrofa		Coronaviridae	Orthocoronavirinae	Deltacoronavirus	Buldecovirus	Deltacoronavirus_suis	PoCoV_HKU15	Delta_HKU15
Public database	MZ802955		25403	complete genome		2020-09-01	China				Porcine deltacoronavirus	CH-HLJ-20	CH-HLJ-20	swine	Artiodactyla	Suidae	Sus	Sus scrofa		Coronaviridae	Orthocoronavirinae	Deltacoronavirus	Buldecovirus	Deltacoronavirus_suis	PoCoV_HKU15	Delta_HKU15
Public database	OQ547740		25422	complete genome		2021	China				Porcine deltacoronavirus	PDCoV-GX2021-1	PDCoV-GX2021-1	swine	Artiodactyla	Suidae	Sus	Sus scrofa		Coronaviridae	Orthocoronavirinae	Deltacoronavirus	Buldecovirus	Deltacoronavirus_suis	PoCoV_HKU15	Delta_HKU15
Public database	KT336560		25420	complete genome		2014-11-24	China				Porcine deltacoronavirus	CHN-HN-2014	CHN-HN-2014	Sus scrofa	Artiodactyla	Suidae	Sus	Sus scrofa		Coronaviridae	Orthocoronavirinae	Deltacoronavirus	Buldecovirus	Deltacoronavirus_suis	PoCoV_HKU15	Delta_HKU15
Public database	KJ584356		25422	complete genome		2014-02-20	USA	South Dakota		feces and intestine samples	Porcine coronavirus HKU15	IL2768		pig	Artiodactyla	Suidae	Sus	Sus scrofa		Coronaviridae	Orthocoronavirinae	Deltacoronavirus	Buldecovirus	Deltacoronavirus_suis	PoCoV_HKU15	Delta_HKU15
Public database	KR265847		25394	complete genome		2014-03-06	USA	Minnesota			Porcine deltacoronavirus	USA/Minnesota442/2014	USA/Minnesota442/2014	pig	Artiodactyla	Suidae	Sus	Sus scrofa		Coronaviridae	Orthocoronavirinae	Deltacoronavirus	Buldecovirus	Deltacoronavirus_suis	PoCoV_HKU15	Delta_HKU15
Public database	KR265848		25396	complete genome		2014-03-14	USA	Minnesota			Porcine deltacoronavirus	USA/Minnesota214/2014	USA/Minnesota214/2014	pig	Artiodactyla	Suidae	Sus	Sus scrofa		Coronaviridae	Orthocoronavirinae	Deltacoronavirus	Buldecovirus	Deltacoronavirus_suis	PoCoV_HKU15	Delta_HKU15
Public database	LC260045		25359	complete genome		2016-09-01	Japan	Hokkaido			Porcine deltacoronavirus			Sus scrofa domesticus	Artiodactyla	Suidae	Sus	Sus scrofa		Coronaviridae	Orthocoronavirinae	Deltacoronavirus	Buldecovirus	Deltacoronavirus_suis	PoCoV_HKU15	Delta_HKU15
Public database	KM820765		25422	complete genome		2014-04-01	South Korea	NA	NA	feces	Porcine deltacoronavirus KNU14-04	KNU14-04	KNU14-04	pig	Artiodactyla	Suidae	Sus	Sus scrofa		Coronaviridae	Orthocoronavirinae	Deltacoronavirus	Buldecovirus	Deltacoronavirus_suis	PoCoV_HKU15	Delta_HKU15
Public database	LC260038		25362	complete genome		2014-05-01	Japan	Akita		fecal sample	Porcine deltacoronavirus	RNA		Sus scrofa domesticus	Artiodactyla	Suidae	Sus	Sus scrofa		Coronaviridae	Orthocoronavirinae	Deltacoronavirus	Buldecovirus	Deltacoronavirus_suis	PoCoV_HKU15	Delta_HKU15
Public database	LC260041		25362	complete genome		2014-05-01	Japan	Iwate		fecal sample	Porcine deltacoronavirus	RNA		Sus scrofa domesticus	Artiodactyla	Suidae	Sus	Sus scrofa		Coronaviridae	Orthocoronavirinae	Deltacoronavirus	Buldecovirus	Deltacoronavirus_suis	PoCoV_HKU15	Delta_HKU15
Public database	KY354363		25422	complete genome		2016-04-01	South Korea	Kyunggido			Porcine deltacoronavirus	DH1	DH1	porcine	Artiodactyla	Suidae	Sus	Sus scrofa		Coronaviridae	Orthocoronavirinae	Deltacoronavirus	Buldecovirus	Deltacoronavirus_suis	PoCoV_HKU15	Delta_HKU15
Public database	KY354364		25422	complete genome		2016-04-01	South Korea	Kyunggido			Porcine deltacoronavirus	DH2	DH2	porcine	Artiodactyla	Suidae	Sus	Sus scrofa		Coronaviridae	Orthocoronavirinae	Deltacoronavirus	Buldecovirus	Deltacoronavirus_suis	PoCoV_HKU15	Delta_HKU15
Public database	LC260039		25362	complete genome		2014-05-01	Japan	Gunma		fecal sample	Porcine deltacoronavirus	RNA		Sus scrofa domesticus	Artiodactyla	Suidae	Sus	Sus scrofa		Coronaviridae	Orthocoronavirinae	Deltacoronavirus	Buldecovirus	Deltacoronavirus_suis	PoCoV_HKU15	Delta_HKU15
Public database	LC260040		25362	complete genome		2014-05-01	Japan	Gunma		fecal sample	Porcine deltacoronavirus	RNA		Sus scrofa domesticus	Artiodactyla	Suidae	Sus	Sus scrofa		Coronaviridae	Orthocoronavirinae	Deltacoronavirus	Buldecovirus	Deltacoronavirus_suis	PoCoV_HKU15	Delta_HKU15
Public database	KR265854		25394	complete genome		2014-05-21	USA	Minnesota			Porcine deltacoronavirus	USA/Minnesota454/2014	USA/Minnesota454/2014	pig	Artiodactyla	Suidae	Sus	Sus scrofa		Coronaviridae	Orthocoronavirinae	Deltacoronavirus	Buldecovirus	Deltacoronavirus_suis	PoCoV_HKU15	Delta_HKU15
Public database	KR265855		25394	complete genome		2014-05-21	USA	Minnesota			Porcine deltacoronavirus	USA/Minnesota455/2014	USA/Minnesota455/2014	pig	Artiodactyla	Suidae	Sus	Sus scrofa		Coronaviridae	Orthocoronavirinae	Deltacoronavirus	Buldecovirus	Deltacoronavirus_suis	PoCoV_HKU15	Delta_HKU15
Public database	KT266822		25404	complete genome		2012	China	Sichuan		fecal sample	Porcine deltacoronavirus	CH/Sichuan/S27/2012		pig	Artiodactyla	Suidae	Sus	Sus scrofa		Coronaviridae	Orthocoronavirinae	Deltacoronavirus	Buldecovirus	Deltacoronavirus_suis	PoCoV_HKU15	Delta_HKU15
Public database	KJ481931		25406	complete genome		2014-01-04	USA	NA	NA	feces	Deltacoronavirus PDCoV/USA/Illinois121/2014	PDCoV/USA/Illinois121/2014	PDCoV/USA/Illinois121/2014	swine	Artiodactyla	Suidae	Sus	Sus scrofa		Coronaviridae	Orthocoronavirinae	Deltacoronavirus	Buldecovirus	Deltacoronavirus_suis	PoCoV_HKU15	Delta_HKU15
Public database	KJ601779		25404	complete genome		2014-01-11	USA	Illinois			Deltacoronavirus PDCoV/USA/Illinois136/2014			swine	Artiodactyla	Suidae	Sus	Sus scrofa		Coronaviridae	Orthocoronavirinae	Deltacoronavirus	Buldecovirus	Deltacoronavirus_suis	PoCoV_HKU15	Delta_HKU15
Public database	KJ462462		25422	complete genome		2014-01-31	USA	Ohio		feces and intestine samples	Porcine coronavirus HKU15	IA1162/2020		pig	Artiodactyla	Suidae	Sus	Sus scrofa		Coronaviridae	Orthocoronavirinae	Deltacoronavirus	Buldecovirus	Deltacoronavirus_suis	PoCoV_HKU15	Delta_HKU15
Public database	KM012168		25411	complete genome		2014-03-17	USA	Michigan			Porcine coronavirus HKU15	Michigan/8977/2014		pig	Artiodactyla	Suidae	Sus	Sus scrofa		Coronaviridae	Orthocoronavirinae	Deltacoronavirus	Buldecovirus	Deltacoronavirus_suis	PoCoV_HKU15	Delta_HKU15
Public database	KT381613		25422	complete genome		2014-05-07	USA	Ohio		small intestines	Porcine coronavirus HKU15	OH1987		pig	Artiodactyla	Suidae	Sus	Sus scrofa		Coronaviridae	Orthocoronavirinae	Deltacoronavirus	Buldecovirus	Deltacoronavirus_suis	PoCoV_HKU15	Delta_HKU15
Public database	KJ584357		25422	complete genome		2014-03-07	USA	Kentucky		feces and intestine samples	Porcine coronavirus HKU15	SD3424		pig	Artiodactyla	Suidae	Sus	Sus scrofa		Coronaviridae	Orthocoronavirinae	Deltacoronavirus	Buldecovirus	Deltacoronavirus_suis	PoCoV_HKU15	Delta_HKU15
Public database	KJ584358		25422	complete genome		2014-02-18	USA	Pennsylvania		feces and intestine samples	Porcine coronavirus HKU15	KY4813		pig	Artiodactyla	Suidae	Sus	Sus scrofa		Coronaviridae	Orthocoronavirinae	Deltacoronavirus	Buldecovirus	Deltacoronavirus_suis	PoCoV_HKU15	Delta_HKU15
Public database	KJ584359		25422	complete genome		2014-02-21	USA	Nebraska		feces and intestine samples	Porcine coronavirus HKU15	PA3148		pig	Artiodactyla	Suidae	Sus	Sus scrofa		Coronaviridae	Orthocoronavirinae	Deltacoronavirus	Buldecovirus	Deltacoronavirus_suis	PoCoV_HKU15	Delta_HKU15
Public database	KJ620016		25422	complete genome		2014-03-18	USA	Michigan		feces and intestine samples	Porcine coronavirus HKU15	MN3092		pig	Artiodactyla	Suidae	Sus	Sus scrofa		Coronaviridae	Orthocoronavirinae	Deltacoronavirus	Buldecovirus	Deltacoronavirus_suis	PoCoV_HKU15	Delta_HKU15
Public database	NC_039208		25425	complete genome	yes	2010	China	Hong Kong		Tracheal, rectal, and cloacal swabs	Porcine coronavirus HKU15	HKU15-155		pig	Artiodactyla	Suidae	Sus	Sus scrofa		Coronaviridae	Orthocoronavirinae	Deltacoronavirus	Buldecovirus	Deltacoronavirus_suis	PoCoV_HKU15	Delta_HKU15
Public database	KJ769231		25433	complete genome		2014-03-01	USA	Ohio	NA	fecal, intestinal content, liver, kidney, lung, and blood samples	Swine deltacoronavirus OhioCVM1/2014	complete	OhioCVM1/2014	swine	Artiodactyla	Suidae	Sus	Sus scrofa		Coronaviridae	Orthocoronavirinae	Deltacoronavirus	Buldecovirus	Deltacoronavirus_suis	PoCoV_HKU15	Delta_HKU15
Public database	KJ567050		25422	complete genome		2014-02-20	USA	Iowa		fecal sample	Porcine deltacoronavirus 8734/USA-IA/2014	complete		pig	Artiodactyla	Suidae	Sus	Sus scrofa		Coronaviridae	Orthocoronavirinae	Deltacoronavirus	Buldecovirus	Deltacoronavirus_suis	PoCoV_HKU15	Delta_HKU15
Public database	LC260043		25362	complete genome		2014-08-01	Japan	Okinawa		fecal sample	Porcine deltacoronavirus	RNA		Sus scrofa domesticus	Artiodactyla	Suidae	Sus	Sus scrofa		Coronaviridae	Orthocoronavirinae	Deltacoronavirus	Buldecovirus	Deltacoronavirus_suis	PoCoV_HKU15	Delta_HKU15
Public database	LC260044		25362	complete genome		2014-12-01	Japan	Yamagata		fecal sample	Porcine deltacoronavirus	RNA		Sus scrofa domesticus	Artiodactyla	Suidae	Sus	Sus scrofa		Coronaviridae	Orthocoronavirinae	Deltacoronavirus	Buldecovirus	Deltacoronavirus_suis	PoCoV_HKU15	Delta_HKU15
Public database	MG837130		25422	complete genome		2016-11-01	South Korea	Kyungpook		feces	Porcine deltacoronavirus	KNU16-07-P5	KNU16-07-P5	pig	Artiodactyla	Suidae	Sus	Sus scrofa		Coronaviridae	Orthocoronavirinae	Deltacoronavirus	Buldecovirus	Deltacoronavirus_suis	PoCoV_HKU15	Delta_HKU15
Public database	MG837131		25422	complete genome		2016-11-01	South Korea	Kyungpook		feces	Porcine deltacoronavirus	KNU16-07-P10	KNU16-07-P10	pig	Artiodactyla	Suidae	Sus	Sus scrofa		Coronaviridae	Orthocoronavirinae	Deltacoronavirus	Buldecovirus	Deltacoronavirus_suis	PoCoV_HKU15	Delta_HKU15
Public database	MW196362		25447	complete genome		2019	USA	Illinois			Porcine deltacoronavirus	USA/IL/2014/026PDV_P11		swine	Artiodactyla	Suidae	Sus	Sus scrofa		Coronaviridae	Orthocoronavirinae	Deltacoronavirus	Buldecovirus	Deltacoronavirus_suis	PoCoV_HKU15	Delta_HKU15
Public database	KX022602		25382	complete genome		2015-10-15	USA	Iowa		feces	Porcine deltacoronavirus			pig	Artiodactyla	Suidae	Sus	Sus scrofa		Coronaviridae	Orthocoronavirinae	Deltacoronavirus	Buldecovirus	Deltacoronavirus_suis	PoCoV_HKU15	Delta_HKU15
Public database	KX022603		25394	complete genome		2015-12-18	USA	Minnesota		feces	Porcine deltacoronavirus			pig	Artiodactyla	Suidae	Sus	Sus scrofa		Coronaviridae	Orthocoronavirinae	Deltacoronavirus	Buldecovirus	Deltacoronavirus_suis	PoCoV_HKU15	Delta_HKU15
Public database	KX022604		25382	complete genome		2015-11-27	USA	Nebraska		feces	Porcine deltacoronavirus			pig	Artiodactyla	Suidae	Sus	Sus scrofa		Coronaviridae	Orthocoronavirinae	Deltacoronavirus	Buldecovirus	Deltacoronavirus_suis	PoCoV_HKU15	Delta_HKU15
Public database	KX022605		25320	complete genome		2015-12-21	USA	Nebraska		fecal swab	Porcine deltacoronavirus			pig	Artiodactyla	Suidae	Sus	Sus scrofa		Coronaviridae	Orthocoronavirinae	Deltacoronavirus	Buldecovirus	Deltacoronavirus_suis	PoCoV_HKU15	Delta_HKU15
Public database	MN520191		25382	complete genome		2019	China	Shandong			Porcine deltacoronavirus	SD2019-426	SD2019-426		Artiodactyla	Suidae	Sus	Sus scrofa		Coronaviridae	Orthocoronavirinae	Deltacoronavirus	Buldecovirus	Deltacoronavirus_suis	PoCoV_HKU15	Delta_HKU15
Public database	MN520198		25413	complete genome		2019	China	Anhui			Porcine deltacoronavirus	AH2019-H	AH2019-H		Artiodactyla	Suidae	Sus	Sus scrofa		Coronaviridae	Orthocoronavirinae	Deltacoronavirus	Buldecovirus	Deltacoronavirus_suis	PoCoV_HKU15	Delta_HKU15
Public database	KJ601777		25408	complete genome		2014-01-08	USA	Illinois			Deltacoronavirus PDCoV/USA/Illinois133/2014			swine	Artiodactyla	Suidae	Sus	Sus scrofa		Coronaviridae	Orthocoronavirinae	Deltacoronavirus	Buldecovirus	Deltacoronavirus_suis	PoCoV_HKU15	Delta_HKU15
Public database	KJ601778		25404	complete genome		2014-01-08	USA	Illinois			Deltacoronavirus PDCoV/USA/Illinois134/2014			swine	Artiodactyla	Suidae	Sus	Sus scrofa		Coronaviridae	Orthocoronavirinae	Deltacoronavirus	Buldecovirus	Deltacoronavirus_suis	PoCoV_HKU15	Delta_HKU15
Public database	KJ601780		25404	complete genome		2014-01-26	USA	Ohio			Deltacoronavirus PDCoV/USA/Ohio137/2014			swine	Artiodactyla	Suidae	Sus	Sus scrofa		Coronaviridae	Orthocoronavirinae	Deltacoronavirus	Buldecovirus	Deltacoronavirus_suis	PoCoV_HKU15	Delta_HKU15
Public database	MT227371		25501	complete genome		2019-10-01	Peru				Porcine deltacoronavirus			porcine	Artiodactyla	Suidae	Sus	Sus scrofa		Coronaviridae	Orthocoronavirinae	Deltacoronavirus	Buldecovirus	Deltacoronavirus_suis	PoCoV_HKU15	Delta_HKU15
Public database	MZ291567		25438	complete genome		2014	USA				Porcine deltacoronavirus			swine	Artiodactyla	Suidae	Sus	Sus scrofa		Coronaviridae	Orthocoronavirinae	Deltacoronavirus	Buldecovirus	Deltacoronavirus_suis	PoCoV_HKU15	Delta_HKU15
Public database	OQ566226		25422	complete genome		2021	South Korea				Porcine deltacoronavirus	GNU-2105	GNU-2105	pig	Artiodactyla	Suidae	Sus	Sus scrofa		Coronaviridae	Orthocoronavirinae	Deltacoronavirus	Buldecovirus	Deltacoronavirus_suis	PoCoV_HKU15	Delta_HKU15
Public database	OQ566227		25422	complete genome		2021	South Korea				Porcine deltacoronavirus	GNU-2105-P1	GNU-2105-P1	pig	Artiodactyla	Suidae	Sus	Sus scrofa		Coronaviridae	Orthocoronavirinae	Deltacoronavirus	Buldecovirus	Deltacoronavirus_suis	PoCoV_HKU15	Delta_HKU15
Public database	OQ566228		25422	complete genome		2021	South Korea				Porcine deltacoronavirus	GNU-2105-P5	GNU-2105-P5	pig	Artiodactyla	Suidae	Sus	Sus scrofa		Coronaviridae	Orthocoronavirinae	Deltacoronavirus	Buldecovirus	Deltacoronavirus_suis	PoCoV_HKU15	Delta_HKU15
Public database	KR150443		25398	complete genome		2015-03-24	USA	Arkansas			Porcine deltacoronavirus			pig	Artiodactyla	Suidae	Sus	Sus scrofa		Coronaviridae	Orthocoronavirinae	Deltacoronavirus	Buldecovirus	Deltacoronavirus_suis	PoCoV_HKU15	Delta_HKU15
Public database	KY364365		25422	complete genome		2014-07-01	South Korea			feces	Porcine deltacoronavirus	KNU16-07	KNU16-07	pig	Artiodactyla	Suidae	Sus	Sus scrofa		Coronaviridae	Orthocoronavirinae	Deltacoronavirus	Buldecovirus	Deltacoronavirus_suis	PoCoV_HKU15	Delta_HKU15
Public database	KR265849		25393	complete genome		2014-04-02	USA	Michigan			Porcine deltacoronavirus	USA/Michigan447/2014	USA/Michigan447/2014	pig	Artiodactyla	Suidae	Sus	Sus scrofa		Coronaviridae	Orthocoronavirinae	Deltacoronavirus	Buldecovirus	Deltacoronavirus_suis	PoCoV_HKU15	Delta_HKU15
Public database	KR265850		25394	complete genome		2014-04-02	USA	Michigan			Porcine deltacoronavirus	USA/Michigan448/2014	USA/Michigan448/2014	pig	Artiodactyla	Suidae	Sus	Sus scrofa		Coronaviridae	Orthocoronavirinae	Deltacoronavirus	Buldecovirus	Deltacoronavirus_suis	PoCoV_HKU15	Delta_HKU15
Public database	KR265851		25394	complete genome		2014-05-13	USA	Indiana			Porcine deltacoronavirus	USA/Indiana453/2014	USA/Indiana453/2014	pig	Artiodactyla	Suidae	Sus	Sus scrofa		Coronaviridae	Orthocoronavirinae	Deltacoronavirus	Buldecovirus	Deltacoronavirus_suis	PoCoV_HKU15	Delta_HKU15
Public database	KR265852		25394	complete genome		2014-04-21	USA	Illinois			Porcine deltacoronavirus	USA/Illinois449/2014	USA/Illinois449/2014	pig	Artiodactyla	Suidae	Sus	Sus scrofa		Coronaviridae	Orthocoronavirinae	Deltacoronavirus	Buldecovirus	Deltacoronavirus_suis	PoCoV_HKU15	Delta_HKU15
Public database	KR265853		25394	complete genome		2013-10-14	USA	Minnesota			Porcine deltacoronavirus	USA/Minnesota/2013	USA/Minnesota/2013	pig	Artiodactyla	Suidae	Sus	Sus scrofa		Coronaviridae	Orthocoronavirinae	Deltacoronavirus	Buldecovirus	Deltacoronavirus_suis	PoCoV_HKU15	Delta_HKU15
Public database	KR265858		25394	complete genome		2014-05-06	USA	North Carolina			Porcine deltacoronavirus	USA/NorthCarolina452/2014	USA/NorthCarolina452/2014	pig	Artiodactyla	Suidae	Sus	Sus scrofa		Coronaviridae	Orthocoronavirinae	Deltacoronavirus	Buldecovirus	Deltacoronavirus_suis	PoCoV_HKU15	Delta_HKU15
Public database	KR265859		25401	complete genome		2014-02-11	USA	Minnesota			Porcine deltacoronavirus	USA/Minnesota159/2014	USA/Minnesota159/2014	pig	Artiodactyla	Suidae	Sus	Sus scrofa		Coronaviridae	Orthocoronavirinae	Deltacoronavirus	Buldecovirus	Deltacoronavirus_suis	PoCoV_HKU15	Delta_HKU15
Public database	KR265860		25396	complete genome		2014-02-05	USA	Nebraska			Porcine deltacoronavirus	USA/Nebraska209/2014	USA/Nebraska209/2014	pig	Artiodactyla	Suidae	Sus	Sus scrofa		Coronaviridae	Orthocoronavirinae	Deltacoronavirus	Buldecovirus	Deltacoronavirus_suis	PoCoV_HKU15	Delta_HKU15
Public database	KR265861		25404	complete genome		2014-02-05	USA	Nebraska			Porcine deltacoronavirus	USA/Nebraska210/2014	USA/Nebraska210/2014	pig	Artiodactyla	Suidae	Sus	Sus scrofa		Coronaviridae	Orthocoronavirinae	Deltacoronavirus	Buldecovirus	Deltacoronavirus_suis	PoCoV_HKU15	Delta_HKU15
Public database	KR265862		25394	complete genome		2014-03-26	USA	Ohio			Porcine deltacoronavirus	USA/Ohio444/2014	USA/Ohio444/2014	pig	Artiodactyla	Suidae	Sus	Sus scrofa		Coronaviridae	Orthocoronavirinae	Deltacoronavirus	Buldecovirus	Deltacoronavirus_suis	PoCoV_HKU15	Delta_HKU15
Public database	KR265863		25394	complete genome		2014-03-27	USA	Ohio			Porcine deltacoronavirus	USA/Ohio445/2014	USA/Ohio445/2014	pig	Artiodactyla	Suidae	Sus	Sus scrofa		Coronaviridae	Orthocoronavirinae	Deltacoronavirus	Buldecovirus	Deltacoronavirus_suis	PoCoV_HKU15	Delta_HKU15
Public database	KR265864		25395	complete genome		2014-03-14	USA	Minnesota			Porcine deltacoronavirus	USA/Minnesota292/2014	USA/Minnesota292/2014	pig	Artiodactyla	Suidae	Sus	Sus scrofa		Coronaviridae	Orthocoronavirinae	Deltacoronavirus	Buldecovirus	Deltacoronavirus_suis	PoCoV_HKU15	Delta_HKU15
Public database	KR265865		25394	complete genome		2014-06-05	USA	Iowa			Porcine deltacoronavirus	USA/Iowa459/2014	USA/Iowa459/2014	pig	Artiodactyla	Suidae	Sus	Sus scrofa		Coronaviridae	Orthocoronavirinae	Deltacoronavirus	Buldecovirus	Deltacoronavirus_suis	PoCoV_HKU15	Delta_HKU15
Public database	KF793824		31769	complete genome	yes	2010	China	Hongkong	NA	respiratory, fecal, and blood samples	Bottlenose dolphin coronavirus HKU22	CF090325	CF090331		Artiodactyla	Delphinidae	Tursiops	Tursiops truncatus		Coronaviridae	Orthocoronavirinae	Gammacoronavirus	Cegacovirus	Gammacoronavirus_delphinapteri	BdCoV_HKU22	Gamma_HKU22
Public database	KF793826		31775	complete genome		2010	China	Hongkong	NA	respiratory, fecal, and blood samples	Bottlenose dolphin coronavirus HKU22	CF090331	CF090331		Artiodactyla	Delphinidae	Tursiops	Tursiops truncatus		Coronaviridae	Orthocoronavirinae	Gammacoronavirus	Cegacovirus	Gammacoronavirus_delphinapteri	BdCoV_HKU22	Gamma_HKU22
Public database	KF793825		31766	complete genome		2010	China	Hongkong	NA	respiratory, fecal, and blood samples	Bottlenose dolphin coronavirus HKU22	CF090327	CF090331		Artiodactyla	Delphinidae	Tursiops	Tursiops truncatus		Coronaviridae	Orthocoronavirinae	Gammacoronavirus	Cegacovirus	Gammacoronavirus_delphinapteri	BdCoV_HKU22	Gamma_HKU22
Public database	EU111742		31686	complete genome	yes	2007	USA			whale liver	Beluga whale coronavirus SW1	SW1	SW1	Delphinapterus leucas (beluga whale)	Artiodactyla	Monodontidae	Delphinapterus	Delphinapterus leucas		Coronaviridae	Orthocoronavirinae	Gammacoronavirus	Cegacovirus	Gammacoronavirus_delphinapteri	BdCoV_HKU22	Gamma_HKU22
Public database	NC_010646		31686	complete genome	yes	2007	USA			whale liver	Beluga whale coronavirus SW1	SW1	SW1	Delphinapterus leucas (beluga whale)	Artiodactyla	Monodontidae	Delphinapterus	Delphinapterus leucas		Coronaviridae	Orthocoronavirinae	Gammacoronavirus	Cegacovirus	Gammacoronavirus_delphinapteri	BdCoV_HKU22	Gamma_HKU22
Public database	MN690608		31728	complete genome		2019	USA			feces	Bottlenose dolphin coronavirus	37112-1		bottlenose dolphin	Artiodactyla	Delphinidae	Tursiops	Tursiops truncatus		Coronaviridae	Orthocoronavirinae	Gammacoronavirus	Cegacovirus	Gammacoronavirus_delphinapteri	BdCoV_HKU22	Gamma_HKU22
Public database	MN690609		31728	complete genome		2019	USA			feces	Bottlenose dolphin coronavirus	37112-2		bottlenose dolphin	Artiodactyla	Delphinidae	Tursiops	Tursiops truncatus		Coronaviridae	Orthocoronavirinae	Gammacoronavirus	Cegacovirus	Gammacoronavirus_delphinapteri	BdCoV_HKU22	Gamma_HKU22
Public database	MN690610		31728	complete genome		2019	USA			feces	Bottlenose dolphin coronavirus	37112-3		bottlenose dolphin	Artiodactyla	Delphinidae	Tursiops	Tursiops truncatus		Coronaviridae	Orthocoronavirinae	Gammacoronavirus	Cegacovirus	Gammacoronavirus_delphinapteri	BdCoV_HKU22	Gamma_HKU22
Public database	MN690611		31728	complete genome		2019	USA			feces	Bottlenose dolphin coronavirus	37112-4		bottlenose dolphin	Artiodactyla	Delphinidae	Tursiops	Tursiops truncatus		Coronaviridae	Orthocoronavirinae	Gammacoronavirus	Cegacovirus	Gammacoronavirus_delphinapteri	BdCoV_HKU22	Gamma_HKU22
Public database	MK617402		472	partial, RdRp		2009-04-21	Poland			Cloacal/fecal swab	Avian coronavirus	GammaCoV/AvCoV/Greylag_goose/Poland/MW133/2009	GammaCoV/AvCoV/Greylag_goose/Poland/MW133/2009	greylag goose	Anseriformes	Anatidae	Anser	Anser anser	yes	Coronaviridae	Orthocoronavirinae	Gammacoronavirus	Brangacovirus	Gammacoronavirus_brantae	BcanCoV_CB17	Gamma_CB17
Public database	MK617481		472	partial, RdRp		2016-02-02	Poland			Cloacal/fecal swab	Avian coronavirus	GammaCoV/AvCoV/Mute_swan/Poland/P018/12/2016	GammaCoV/AvCoV/Mute_swan/Poland/P018/12/2016	mute swan	Anseriformes	Anatidae	Cygnus	Cygnus olor	yes	Coronaviridae	Orthocoronavirinae	Gammacoronavirus	Brangacovirus	Gammacoronavirus_brantae	BcanCoV_CB17	Gamma_CB17
Public database	MK617483		472	partial, RdRp		2016-02-05	Poland			Cloacal/fecal swab	Avian coronavirus	GammaCoV/AvCoV/Mute_swan/Poland/P019pool1/2016	GammaCoV/AvCoV/Mute_swan/Poland/P019pool1/2016	mute swan	Anseriformes	Anatidae	Cygnus	Cygnus olor	yes	Coronaviridae	Orthocoronavirinae	Gammacoronavirus	Brangacovirus	Gammacoronavirus_brantae	BcanCoV_CB17	Gamma_CB17
Public database	MK617469		472	partial, RdRp		2014-03-02	Poland			Cloacal/fecal swab	Avian coronavirus	GammaCoV/AvCoV/Mute_swan/Poland/Mor031/4/2014	GammaCoV/AvCoV/Mute_swan/Poland/Mor031/4/2014	mute swan	Anseriformes	Anatidae	Cygnus	Cygnus olor	yes	Coronaviridae	Orthocoronavirinae	Gammacoronavirus	Brangacovirus	Gammacoronavirus_brantae	BcanCoV_CB17	Gamma_CB17
Public database	MK617479		472	partial, RdRp		2009-11-19	Poland			Cloacal/fecal swab	Avian coronavirus	GammaCoV/AvCoV/Mute_swan/Poland/MW383/2009	GammaCoV/AvCoV/Mute_swan/Poland/MW383/2009	mute swan	Anseriformes	Anatidae	Cygnus	Cygnus olor	yes	Coronaviridae	Orthocoronavirinae	Gammacoronavirus	Brangacovirus	Gammacoronavirus_brantae	BcanCoV_CB17	Gamma_CB17
Public database	MK617470		465	partial, RdRp		2014-03-04	Poland			Cloacal/fecal swab	Avian coronavirus	GammaCoV/AvCoV/Mute_swan/Poland/Mor033/2/2014	GammaCoV/AvCoV/Mute_swan/Poland/Mor033/2/2014	mute swan	Anseriformes	Anatidae	Cygnus	Cygnus olor	yes	Coronaviridae	Orthocoronavirinae	Gammacoronavirus	Brangacovirus	Gammacoronavirus_brantae	BcanCoV_CB17	Gamma_CB17
Public database	MK617480		472	partial, RdRp		2015-01-05	Poland			Cloacal/fecal swab	Avian coronavirus	GammaCoV/AvCoV/Mute_swan/Poland/P005/14/2015	GammaCoV/AvCoV/Mute_swan/Poland/P005/14/2015	mute swan	Anseriformes	Anatidae	Cygnus	Cygnus olor	yes	Coronaviridae	Orthocoronavirinae	Gammacoronavirus	Brangacovirus	Gammacoronavirus_brantae	BcanCoV_CB17	Gamma_CB17
Public database	KU321645		225	partial, RdRp		2013-06-25	Brazil	Ibirapuera Park, SP		oral/cloacal swab	Anser cygnoides coronavirus	DPV_16	DPV_16	Anser cygnoides	Anseriformes	Anatidae	Anser	Anser cygnoides		Coronaviridae	Orthocoronavirinae	Gammacoronavirus	Brangacovirus	Gammacoronavirus_brantae	BcanCoV_CB17	Gamma_CB17
Public database	MK617484		472	partial, RdRp		2016-06-09	Poland			Cloacal/fecal swab	Avian coronavirus	GammaCoV/AvCoV/Mute_swan/Poland/P048/1/2016	GammaCoV/AvCoV/Mute_swan/Poland/P048/1/2016	mute swan	Anseriformes	Anatidae	Cygnus	Cygnus olor	yes	Coronaviridae	Orthocoronavirinae	Gammacoronavirus	Brangacovirus	Gammacoronavirus_brantae	BcanCoV_CB17	Gamma_CB17
Public database	MK617471		472	partial, RdRp		2014-03-05	Poland			Cloacal/fecal swab	Avian coronavirus	GammaCoV/AvCoV/Mute_swan/Poland/Mor034/10/2014	GammaCoV/AvCoV/Mute_swan/Poland/Mor034/10/2014	mute swan	Anseriformes	Anatidae	Cygnus	Cygnus olor	yes	Coronaviridae	Orthocoronavirinae	Gammacoronavirus	Brangacovirus	Gammacoronavirus_brantae	BcanCoV_CB17	Gamma_CB17
Public database	MK617478		472	partial, RdRp		2009-10-29	Poland			Cloacal/fecal swab	Avian coronavirus	GammaCoV/AvCoV/Mute_swan/Poland/MW361/2009	GammaCoV/AvCoV/Mute_swan/Poland/MW361/2009	mute swan	Anseriformes	Anatidae	Cygnus	Cygnus olor	yes	Coronaviridae	Orthocoronavirinae	Gammacoronavirus	Brangacovirus	Gammacoronavirus_brantae	BcanCoV_CB17	Gamma_CB17
Public database	MK617405		472	partial, RdRp		2009-11-25	Poland			Cloacal/fecal swab	Avian coronavirus	GammaCoV/AvCoV/Greylag_goose/Poland/MW394/2009	GammaCoV/AvCoV/Greylag_goose/Poland/MW394/2009	greylag goose	Anseriformes	Anatidae	Anser	Anser anser	yes	Coronaviridae	Orthocoronavirinae	Gammacoronavirus	Brangacovirus	Gammacoronavirus_brantae	BcanCoV_CB17	Gamma_CB17
Public database	MK617357		472	partial, RdRp		2009-12-17	Poland			Cloacal/fecal swab	Avian coronavirus	GammaCoV/AvCoV/Bean_goose/Poland/MW436/2009	GammaCoV/AvCoV/Bean_goose/Poland/MW436/2009	bean goose	Anseriformes	Anatidae	Anser	Anser fabalis	yes	Coronaviridae	Orthocoronavirinae	Gammacoronavirus	Brangacovirus	Gammacoronavirus_brantae	BcanCoV_CB17	Gamma_CB17
Public database	MK617406		472	partial, RdRp		2009-11-27	Poland			Cloacal/fecal swab	Avian coronavirus	GammaCoV/AvCoV/Greylag_goose/Poland/MW409/2009	GammaCoV/AvCoV/Greylag_goose/Poland/MW409/2009	greylag goose	Anseriformes	Anatidae	Anser	Anser anser	yes	Coronaviridae	Orthocoronavirinae	Gammacoronavirus	Brangacovirus	Gammacoronavirus_brantae	BcanCoV_CB17	Gamma_CB17
Public database	GU396676		531	partial, RdRp		2005-08-01	Russia	Kolyuchin		faecal and cloacal sample	Brent goose coronavirus KR-70			brent-goose	Anseriformes	Anatidae	Branta	Branta bernicla	yes	Coronaviridae	Orthocoronavirinae	Gammacoronavirus	Brangacovirus	Gammacoronavirus_brantae	BcanCoV_CB17	Gamma_CB17
Public database	GU396690		561	partial, RdRp		2005-08-01	Russia	Wrangel Island		faecal and cloacal sample	Snow goose coronavirus WIR-159			snow goose	Anseriformes	Anatidae	Anser	Anser caerulescens	yes	Coronaviridae	Orthocoronavirinae	Gammacoronavirus	Brangacovirus	Gammacoronavirus_brantae	BcanCoV_CB17	Gamma_CB17
Public database	GU396677		453	partial, RdRp		2005-08-01	Russia	Kolyuchin		faecal and cloacal sample	Brent goose coronavirus KR-69			brent-goose	Anseriformes	Anatidae	Branta	Branta bernicla	yes	Coronaviridae	Orthocoronavirinae	Gammacoronavirus	Brangacovirus	Gammacoronavirus_brantae	BcanCoV_CB17	Gamma_CB17
Public database	GU396678		513	partial, RdRp		2005-08-01	Russia	Kolyuchin		faecal and cloacal sample	Brent goose coronavirus KR-88			brent-goose	Anseriformes	Anatidae	Branta	Branta bernicla	yes	Coronaviridae	Orthocoronavirinae	Gammacoronavirus	Brangacovirus	Gammacoronavirus_brantae	BcanCoV_CB17	Gamma_CB17
Public database	OM642541		387	partial, RdRp		2014-11-22	South Korea			feces	Avian coronavirus	Eastern spot-billed duck/South Korea/SW61/2014	Eastern spot-billed duck/South Korea/SW61/2014	Eastern spot-billed duck	Anseriformes	Anatidae	Anas	Anas zonorhyncha	yes	Coronaviridae	Orthocoronavirinae	Gammacoronavirus	Brangacovirus	Gammacoronavirus_brantae	BcanCoV_CB17	Gamma_CB17
Public database	OM642543		387	partial, RdRp		2015-11-28	South Korea			feces	Avian coronavirus	Eastern spot-billed duck/South Korea/SW17/2015	Eastern spot-billed duck/South Korea/SW17/2015	Eastern spot-billed duck	Anseriformes	Anatidae	Anas	Anas zonorhyncha	yes	Coronaviridae	Orthocoronavirinae	Gammacoronavirus	Brangacovirus	Gammacoronavirus_brantae	BcanCoV_CB17	Gamma_CB17
Public database	OK564740		386	partial, RdRp		2019	United Kingdom	England		feces	Waterbird gammacoronavirus 1	Abbotsbury-muteswan20	Abbotsbury-muteswan20	Cygnus olor	Anseriformes	Anatidae	Cygnus	Cygnus olor	yes	Coronaviridae	Orthocoronavirinae	Gammacoronavirus	Brangacovirus	Gammacoronavirus_brantae	BcanCoV_CB17	Gamma_CB17
Public database	OK564668		862	partial, RdRp			United Kingdom	England		feces	Waterbird gammacoronavirus 1	Abbotsbury-muteswan185	Abbotsbury-muteswan185	Cygnus olor	Anseriformes	Anatidae	Cygnus	Cygnus olor	yes	Coronaviridae	Orthocoronavirinae	Gammacoronavirus	Brangacovirus	Gammacoronavirus_brantae	BcanCoV_CB17	Gamma_CB17
Public database	OK564674		944	partial, RdRp			United Kingdom	England		feces	Waterbird gammacoronavirus 1	Abbotsbury-muteswan16	Abbotsbury-muteswan16	Cygnus olor	Anseriformes	Anatidae	Cygnus	Cygnus olor	yes	Coronaviridae	Orthocoronavirinae	Gammacoronavirus	Brangacovirus	Gammacoronavirus_brantae	BcanCoV_CB17	Gamma_CB17
Public database	OK564670		893	partial, RdRp		2016	United Kingdom	England		feces	Waterbird gammacoronavirus 1	Abbotsbury-sample1445	Abbotsbury-sample1445	Cygnus olor	Anseriformes	Anatidae	Cygnus	Cygnus olor	yes	Coronaviridae	Orthocoronavirinae	Gammacoronavirus	Brangacovirus	Gammacoronavirus_brantae	BcanCoV_CB17	Gamma_CB17
Public database	OK564671		893	partial, RdRp		2016	United Kingdom	England		feces	Waterbird gammacoronavirus 1	Abbotsbury-sample1393	Abbotsbury-sample1393	Cygnus olor	Anseriformes	Anatidae	Cygnus	Cygnus olor	yes	Coronaviridae	Orthocoronavirinae	Gammacoronavirus	Brangacovirus	Gammacoronavirus_brantae	BcanCoV_CB17	Gamma_CB17
Public database	OK564672		893	partial, RdRp		2016	United Kingdom	England		feces	Waterbird gammacoronavirus 1	Abbotsbury-sample1437	Abbotsbury-sample1437	Cygnus olor	Anseriformes	Anatidae	Cygnus	Cygnus olor	yes	Coronaviridae	Orthocoronavirinae	Gammacoronavirus	Brangacovirus	Gammacoronavirus_brantae	BcanCoV_CB17	Gamma_CB17
Public database	OK564673		893	partial, RdRp		2016	United Kingdom	England		feces	Waterbird gammacoronavirus 1	Abbotsbury-sample1458	Abbotsbury-sample1458	Cygnus olor	Anseriformes	Anatidae	Cygnus	Cygnus olor	yes	Coronaviridae	Orthocoronavirinae	Gammacoronavirus	Brangacovirus	Gammacoronavirus_brantae	BcanCoV_CB17	Gamma_CB17
Public database	OK564675		820	partial, RdRp		2016	United Kingdom	England		feces	Waterbird gammacoronavirus 1	Abbotsbury-muteswan69	Abbotsbury-muteswan69	Cygnus olor	Anseriformes	Anatidae	Cygnus	Cygnus olor	yes	Coronaviridae	Orthocoronavirinae	Gammacoronavirus	Brangacovirus	Gammacoronavirus_brantae	BcanCoV_CB17	Gamma_CB17
Public database	OK564669		868	partial, RdRp		2016	United Kingdom	England		feces	Waterbird gammacoronavirus 1	Abbotsbury-muteswan71	Abbotsbury-muteswan71	Cygnus olor	Anseriformes	Anatidae	Cygnus	Cygnus olor	yes	Coronaviridae	Orthocoronavirinae	Gammacoronavirus	Brangacovirus	Gammacoronavirus_brantae	BcanCoV_CB17	Gamma_CB17
Public database	OK564667		951	partial, RdRp			United Kingdom	England		feces	Waterbird gammacoronavirus 1	Abbotsbury-muteswan80	Abbotsbury-muteswan80	Cygnus olor	Anseriformes	Anatidae	Cygnus	Cygnus olor	yes	Coronaviridae	Orthocoronavirinae	Gammacoronavirus	Brangacovirus	Gammacoronavirus_brantae	BcanCoV_CB17	Gamma_CB17
Public database	KX588672		464	partial, RdRp		2013-08-14	Finland			cloacal swab, tracheal swab, oropharyngeal swab, or tissue	Avian coronavirus	AvCoV/Cygnus_cygnus/Finland/4983/2013		Cygnus cygnus	Charadriiformes	Laridae	Chroicocephalus	Chroicocephalus ridibundus		Coronaviridae	Orthocoronavirinae	Gammacoronavirus	Brangacovirus	Gammacoronavirus_brantae	BcanCoV_CB17	Gamma_CB17
Public database	OK564666		840	partial, RdRp			United Kingdom	England		feces	Waterbird gammacoronavirus 1	Abbotsbury-muteswan190	Abbotsbury-muteswan190	Cygnus olor	Anseriformes	Anatidae	Cygnus	Cygnus olor	yes	Coronaviridae	Orthocoronavirinae	Gammacoronavirus	Brangacovirus	Gammacoronavirus_brantae	BcanCoV_CB17	Gamma_CB17
Public database	OM642542		387	partial, RdRp		2014-12-15	South Korea			feces	Avian coronavirus	North pintail/South Korea/SW134/2014	North pintail/South Korea/SW134/2014	North pintail	Anseriformes	Anatidae	Anas	Anas acuta	yes	Coronaviridae	Orthocoronavirinae	Gammacoronavirus	Brangacovirus	Gammacoronavirus_brantae	BcanCoV_CB17	Gamma_CB17
Public database	MW436465		28466	complete genome		2019-03-01	China	Jiangxi		feces	Anser fabalis coronavirus NCN2	NCN2	NCN2	Anatidae sp.	Anseriformes	Anatidae	Anser	Anser fabalis	yes	Coronaviridae	Orthocoronavirinae	Gammacoronavirus	Brangacovirus	Gammacoronavirus_brantae	BcanCoV_CB17	Gamma_CB17
Public database	JN788879		360	partial, RdRp		2008-05-06	Cambodia			cloacal swab	Avian coronavirus	KH08-0852/Dendrocygna javanica/080506	KH08-0852/Dendrocygna javanica/080506	Dendrocygna javanica	Anseriformes	Anatidae	Dendrocygna	Dendrocygna javanica		Coronaviridae	Orthocoronavirinae	Gammacoronavirus	Brangacovirus	Gammacoronavirus_brantae	BcanCoV_CB17	Gamma_CB17
Public database	MK359255		28539	complete genome	yes	2017-08-01	Canada	Nunavut	Nunavut Territory	cloacal swab	Canada goose coronavirus	DuCoV/chicken/Jiangxi/X2138/2019	Cambridge_Bay_2017	Branta canadensis	Anseriformes	Anatidae	Branta	Branta canadensis	yes	Coronaviridae	Orthocoronavirinae	Gammacoronavirus	Brangacovirus	Gammacoronavirus_brantae	BcanCoV_CB17	Gamma_CB17
Public database	NC_046965		28539	complete genome		2017-08-01	Canada	Nunavut	Nunavut Territory	cloacal swab	Canada goose coronavirus	DuCoV/chicken/Jiangxi/X2138/2019	Cambridge_Bay_2017	Branta canadensis	Anseriformes	Anatidae	Branta	Branta canadensis	yes	Coronaviridae	Orthocoronavirinae	Gammacoronavirus	Brangacovirus	Gammacoronavirus_brantae	BcanCoV_CB17	Gamma_CB17
Public database	OK564736		858	partial, RdRp		2016	United Kingdom	England		feces	Waterbird gammacoronavirus 1	Abbotsbury-muteswan70	Abbotsbury-muteswan70	Cygnus olor	Anseriformes	Anatidae	Cygnus	Cygnus olor	yes	Coronaviridae	Orthocoronavirinae	Gammacoronavirus	Brangacovirus	Gammacoronavirus_brantae	BcanCoV_CB17	Gamma_CB17
Public database	OK564737		471	partial, RdRp			United Kingdom	England		feces	Waterbird gammacoronavirus 1	Abbotsbury-bird289	Abbotsbury-bird289		Anseriformes	Anatidae	Cygnus	Cygnus olor	yes	Coronaviridae	Orthocoronavirinae	Gammacoronavirus	Brangacovirus	Gammacoronavirus_brantae	BcanCoV_CB17	Gamma_CB17
Public database	OK564703		933	partial, RdRp			United Kingdom	England		feces	Waterbird gammacoronavirus 1	Abbotsbury-muteswan228	Abbotsbury-muteswan228	Cygnus olor	Anseriformes	Anatidae	Cygnus	Cygnus olor	yes	Coronaviridae	Orthocoronavirinae	Gammacoronavirus	Brangacovirus	Gammacoronavirus_brantae	BcanCoV_CB17	Gamma_CB17
Public database	OK564690		926	partial, RdRp			United Kingdom	England		feces	Waterbird gammacoronavirus 1	Abbotsbury-muteswan184	Abbotsbury-muteswan184	Cygnus olor	Anseriformes	Anatidae	Cygnus	Cygnus olor	yes	Coronaviridae	Orthocoronavirinae	Gammacoronavirus	Brangacovirus	Gammacoronavirus_brantae	BcanCoV_CB17	Gamma_CB17
Public database	OK564714		851	partial, RdRp		2019	United Kingdom	England		feces	Waterbird gammacoronavirus 1	Abbotsbury-bird271	Abbotsbury-bird271		Anseriformes	Anatidae	Cygnus	Cygnus olor	yes	Coronaviridae	Orthocoronavirinae	Gammacoronavirus	Brangacovirus	Gammacoronavirus_brantae	BcanCoV_CB17	Gamma_CB17
Public database	OK564715		930	partial, RdRp		2019	United Kingdom	England		feces	Waterbird gammacoronavirus 1	Abbotsbury-bird270	Abbotsbury-bird270		Anseriformes	Anatidae	Cygnus	Cygnus olor	yes	Coronaviridae	Orthocoronavirinae	Gammacoronavirus	Brangacovirus	Gammacoronavirus_brantae	BcanCoV_CB17	Gamma_CB17
Public database	OK564682		841	partial, RdRp		2020	United Kingdom	England		feces	Waterbird gammacoronavirus 1	Abbotsbury-bird318	Abbotsbury-bird318		Anseriformes	Anatidae	Cygnus	Cygnus olor	yes	Coronaviridae	Orthocoronavirinae	Gammacoronavirus	Brangacovirus	Gammacoronavirus_brantae	BcanCoV_CB17	Gamma_CB17
Public database	OK564689		926	partial, RdRp		2015	United Kingdom	England		feces	Waterbird gammacoronavirus 1	Abbotsbury-muteswan215	Abbotsbury-muteswan215	Cygnus olor	Anseriformes	Anatidae	Cygnus	Cygnus olor	yes	Coronaviridae	Orthocoronavirinae	Gammacoronavirus	Brangacovirus	Gammacoronavirus_brantae	BcanCoV_CB17	Gamma_CB17
Public database	OK564704		929	partial, RdRp		2015	United Kingdom	England		feces	Waterbird gammacoronavirus 1	Abbotsbury-muteswan214	Abbotsbury-muteswan214	Cygnus olor	Anseriformes	Anatidae	Cygnus	Cygnus olor	yes	Coronaviridae	Orthocoronavirinae	Gammacoronavirus	Brangacovirus	Gammacoronavirus_brantae	BcanCoV_CB17	Gamma_CB17
Public database	OK564708		850	partial, RdRp		2016	United Kingdom	England		feces	Waterbird gammacoronavirus 1	Abbotsbury-muteswan235	Abbotsbury-muteswan235	Cygnus olor	Anseriformes	Anatidae	Cygnus	Cygnus olor	yes	Coronaviridae	Orthocoronavirinae	Gammacoronavirus	Brangacovirus	Gammacoronavirus_brantae	BcanCoV_CB17	Gamma_CB17
Public database	OK564739		512	partial, RdRp		2015	United Kingdom	England		feces	Waterbird gammacoronavirus 1	Abbotsbury-muteswan5	Abbotsbury-muteswan5	Cygnus olor	Anseriformes	Anatidae	Cygnus	Cygnus olor	yes	Coronaviridae	Orthocoronavirinae	Gammacoronavirus	Brangacovirus	Gammacoronavirus_brantae	BcanCoV_CB17	Gamma_CB17
Public database	OK564738		509	partial, RdRp		2015	United Kingdom	England		feces	Waterbird gammacoronavirus 1	Abbotsbury-muteswan172	Abbotsbury-muteswan172	Cygnus olor	Anseriformes	Anatidae	Cygnus	Cygnus olor	yes	Coronaviridae	Orthocoronavirinae	Gammacoronavirus	Brangacovirus	Gammacoronavirus_brantae	BcanCoV_CB17	Gamma_CB17
Public database	OK564735		599	partial, RdRp			United Kingdom	England		feces	Waterbird gammacoronavirus 1	Abbotsbury-muteswan72	Abbotsbury-muteswan72	Cygnus olor	Anseriformes	Anatidae	Cygnus	Cygnus olor	yes	Coronaviridae	Orthocoronavirinae	Gammacoronavirus	Brangacovirus	Gammacoronavirus_brantae	BcanCoV_CB17	Gamma_CB17
Public database	MW588092		28467	complete genome		2016	United Kingdom			Cygnus olor fecal material	Mute swan feces associated gammacoronavirus				Anseriformes	Anatidae	Cygnus	Cygnus olor	yes	Coronaviridae	Orthocoronavirinae	Gammacoronavirus	Brangacovirus	Gammacoronavirus_brantae	BcanCoV_CB17	Gamma_CB17
Public database	OK564676		893	partial, RdRp		2016	United Kingdom	England		feces	Waterbird gammacoronavirus 1	Abbotsbury-sample1389	Abbotsbury-sample1389	Cygnus olor	Anseriformes	Anatidae	Cygnus	Cygnus olor	yes	Coronaviridae	Orthocoronavirinae	Gammacoronavirus	Brangacovirus	Gammacoronavirus_brantae	BcanCoV_CB17	Gamma_CB17
Public database	OK564677		893	partial, RdRp		2016	United Kingdom	England		feces	Waterbird gammacoronavirus 1	Abbotsbury-sample1455	Abbotsbury-sample1455	Cygnus olor	Anseriformes	Anatidae	Cygnus	Cygnus olor	yes	Coronaviridae	Orthocoronavirinae	Gammacoronavirus	Brangacovirus	Gammacoronavirus_brantae	BcanCoV_CB17	Gamma_CB17
Public database	OK564678		893	partial, RdRp		2016	United Kingdom	England		feces	Waterbird gammacoronavirus 1	Abbotsbury-sample1382	Abbotsbury-sample1382	Cygnus olor	Anseriformes	Anatidae	Cygnus	Cygnus olor	yes	Coronaviridae	Orthocoronavirinae	Gammacoronavirus	Brangacovirus	Gammacoronavirus_brantae	BcanCoV_CB17	Gamma_CB17
Public database	OK564679		893	partial, RdRp		2016	United Kingdom	England		feces	Waterbird gammacoronavirus 1	Abbotsbury-sample1388	Abbotsbury-sample1388	Cygnus olor	Anseriformes	Anatidae	Cygnus	Cygnus olor	yes	Coronaviridae	Orthocoronavirinae	Gammacoronavirus	Brangacovirus	Gammacoronavirus_brantae	BcanCoV_CB17	Gamma_CB17
Public database	OK564680		924	partial, RdRp			United Kingdom	England		feces	Waterbird gammacoronavirus 1	Abbotsbury-muteswan194	Abbotsbury-muteswan194	Cygnus olor	Anseriformes	Anatidae	Cygnus	Cygnus olor	yes	Coronaviridae	Orthocoronavirinae	Gammacoronavirus	Brangacovirus	Gammacoronavirus_brantae	BcanCoV_CB17	Gamma_CB17
Public database	OK564681		906	partial, RdRp		2016	United Kingdom	England		feces	Waterbird gammacoronavirus 1	Abbotsbury-muteswan237	Abbotsbury-muteswan237	Cygnus olor	Anseriformes	Anatidae	Cygnus	Cygnus olor	yes	Coronaviridae	Orthocoronavirinae	Gammacoronavirus	Brangacovirus	Gammacoronavirus_brantae	BcanCoV_CB17	Gamma_CB17
Public database	OK564683		951	partial, RdRp			United Kingdom	England		feces	Waterbird gammacoronavirus 1	Abbotsbury-muteswan182	Abbotsbury-muteswan182	Cygnus olor	Anseriformes	Anatidae	Cygnus	Cygnus olor	yes	Coronaviridae	Orthocoronavirinae	Gammacoronavirus	Brangacovirus	Gammacoronavirus_brantae	BcanCoV_CB17	Gamma_CB17
Public database	OK564684		936	partial, RdRp			United Kingdom	England		feces	Waterbird gammacoronavirus 1	Abbotsbury-muteswan195	Abbotsbury-muteswan195	Cygnus olor	Anseriformes	Anatidae	Cygnus	Cygnus olor	yes	Coronaviridae	Orthocoronavirinae	Gammacoronavirus	Brangacovirus	Gammacoronavirus_brantae	BcanCoV_CB17	Gamma_CB17
Public database	OK564685		926	partial, RdRp		2020	United Kingdom	England		feces	Waterbird gammacoronavirus 1	Abbotsbury-muteswan267	Abbotsbury-muteswan267	Cygnus olor	Anseriformes	Anatidae	Cygnus	Cygnus olor	yes	Coronaviridae	Orthocoronavirinae	Gammacoronavirus	Brangacovirus	Gammacoronavirus_brantae	BcanCoV_CB17	Gamma_CB17
Public database	OK564686		926	partial, RdRp			United Kingdom	England		feces	Waterbird gammacoronavirus 1	Abbotsbury-muteswan197	Abbotsbury-muteswan197	Cygnus olor	Anseriformes	Anatidae	Cygnus	Cygnus olor	yes	Coronaviridae	Orthocoronavirinae	Gammacoronavirus	Brangacovirus	Gammacoronavirus_brantae	BcanCoV_CB17	Gamma_CB17
Public database	OK564687		926	partial, RdRp			United Kingdom	England		feces	Waterbird gammacoronavirus 1	Abbotsbury-muteswan220	Abbotsbury-muteswan220	Cygnus olor	Anseriformes	Anatidae	Cygnus	Cygnus olor	yes	Coronaviridae	Orthocoronavirinae	Gammacoronavirus	Brangacovirus	Gammacoronavirus_brantae	BcanCoV_CB17	Gamma_CB17
Public database	OK564688		926	partial, RdRp		2020	United Kingdom	England		feces	Waterbird gammacoronavirus 1	Abbotsbury-bird329	Abbotsbury-bird329		Anseriformes	Anatidae	Cygnus	Cygnus olor	yes	Coronaviridae	Orthocoronavirinae	Gammacoronavirus	Brangacovirus	Gammacoronavirus_brantae	BcanCoV_CB17	Gamma_CB17
Public database	OK564691		868	partial, RdRp		2020	United Kingdom	England		feces	Waterbird gammacoronavirus 1	Abbotsbury-muteswan263	Abbotsbury-muteswan263	Cygnus olor	Anseriformes	Anatidae	Cygnus	Cygnus olor	yes	Coronaviridae	Orthocoronavirinae	Gammacoronavirus	Brangacovirus	Gammacoronavirus_brantae	BcanCoV_CB17	Gamma_CB17
Public database	OK564692		862	partial, RdRp			United Kingdom	England		feces	Waterbird gammacoronavirus 1	Abbotsbury-muteswan196	Abbotsbury-muteswan196	Cygnus olor	Anseriformes	Anatidae	Cygnus	Cygnus olor	yes	Coronaviridae	Orthocoronavirinae	Gammacoronavirus	Brangacovirus	Gammacoronavirus_brantae	BcanCoV_CB17	Gamma_CB17
Public database	OK564693		875	partial, RdRp			United Kingdom	England		feces	Waterbird gammacoronavirus 1	Abbotsbury-muteswan221	Abbotsbury-muteswan221	Cygnus olor	Anseriformes	Anatidae	Cygnus	Cygnus olor	yes	Coronaviridae	Orthocoronavirinae	Gammacoronavirus	Brangacovirus	Gammacoronavirus_brantae	BcanCoV_CB17	Gamma_CB17
Public database	OK564694		911	partial, RdRp			United Kingdom	England		feces	Waterbird gammacoronavirus 1	Abbotsbury-bird295	Abbotsbury-bird295		Anseriformes	Anatidae	Cygnus	Cygnus olor	yes	Coronaviridae	Orthocoronavirinae	Gammacoronavirus	Brangacovirus	Gammacoronavirus_brantae	BcanCoV_CB17	Gamma_CB17
Public database	OK564695		899	partial, RdRp			United Kingdom	England		feces	Waterbird gammacoronavirus 1	Abbotsbury-muteswan258	Abbotsbury-muteswan258	Cygnus olor	Anseriformes	Anatidae	Cygnus	Cygnus olor	yes	Coronaviridae	Orthocoronavirinae	Gammacoronavirus	Brangacovirus	Gammacoronavirus_brantae	BcanCoV_CB17	Gamma_CB17
Public database	OK564696		927	partial, RdRp		2015	United Kingdom	England		feces	Waterbird gammacoronavirus 1	Abbotsbury-muteswan203	Abbotsbury-muteswan203	Cygnus olor	Anseriformes	Anatidae	Cygnus	Cygnus olor	yes	Coronaviridae	Orthocoronavirinae	Gammacoronavirus	Brangacovirus	Gammacoronavirus_brantae	BcanCoV_CB17	Gamma_CB17
Public database	OK564697		927	partial, RdRp			United Kingdom	England		feces	Waterbird gammacoronavirus 1	Abbotsbury-muteswan199	Abbotsbury-muteswan199	Cygnus olor	Anseriformes	Anatidae	Cygnus	Cygnus olor	yes	Coronaviridae	Orthocoronavirinae	Gammacoronavirus	Brangacovirus	Gammacoronavirus_brantae	BcanCoV_CB17	Gamma_CB17
Public database	OK564698		938	partial, RdRp			United Kingdom	England		feces	Waterbird gammacoronavirus 1	Abbotsbury-muteswan226	Abbotsbury-muteswan226	Cygnus olor	Anseriformes	Anatidae	Cygnus	Cygnus olor	yes	Coronaviridae	Orthocoronavirinae	Gammacoronavirus	Brangacovirus	Gammacoronavirus_brantae	BcanCoV_CB17	Gamma_CB17
Public database	OK564699		935	partial, RdRp		2019	United Kingdom	England		feces	Waterbird gammacoronavirus 1	Abbotsbury-bird269	Abbotsbury-bird269		Anseriformes	Anatidae	Cygnus	Cygnus olor	yes	Coronaviridae	Orthocoronavirinae	Gammacoronavirus	Brangacovirus	Gammacoronavirus_brantae	BcanCoV_CB17	Gamma_CB17
Public database	OK564700		937	partial, RdRp		2015	United Kingdom	England		feces	Waterbird gammacoronavirus 1	Abbotsbury-muteswan205	Abbotsbury-muteswan205	Cygnus olor	Anseriformes	Anatidae	Cygnus	Cygnus olor	yes	Coronaviridae	Orthocoronavirinae	Gammacoronavirus	Brangacovirus	Gammacoronavirus_brantae	BcanCoV_CB17	Gamma_CB17
Public database	OK564701		941	partial, RdRp		2016	United Kingdom	England		feces	Waterbird gammacoronavirus 1	Abbotsbury-muteswan234	Abbotsbury-muteswan234	Cygnus olor	Anseriformes	Anatidae	Cygnus	Cygnus olor	yes	Coronaviridae	Orthocoronavirinae	Gammacoronavirus	Brangacovirus	Gammacoronavirus_brantae	BcanCoV_CB17	Gamma_CB17
Public database	OK564702		933	partial, RdRp		2015	United Kingdom	England		feces	Waterbird gammacoronavirus 1	Abbotsbury-muteswan210	Abbotsbury-muteswan210	Cygnus olor	Anseriformes	Anatidae	Cygnus	Cygnus olor	yes	Coronaviridae	Orthocoronavirinae	Gammacoronavirus	Brangacovirus	Gammacoronavirus_brantae	BcanCoV_CB17	Gamma_CB17
Public database	OK564705		844	partial, RdRp		2015	United Kingdom	England		feces	Waterbird gammacoronavirus 1	Abbotsbury-muteswan218	Abbotsbury-muteswan218	Cygnus olor	Anseriformes	Anatidae	Cygnus	Cygnus olor	yes	Coronaviridae	Orthocoronavirinae	Gammacoronavirus	Brangacovirus	Gammacoronavirus_brantae	BcanCoV_CB17	Gamma_CB17
Public database	OK564706		850	partial, RdRp		2020	United Kingdom	England		feces	Waterbird gammacoronavirus 1	Abbotsbury-muteswan260	Abbotsbury-muteswan260	Cygnus olor	Anseriformes	Anatidae	Cygnus	Cygnus olor	yes	Coronaviridae	Orthocoronavirinae	Gammacoronavirus	Brangacovirus	Gammacoronavirus_brantae	BcanCoV_CB17	Gamma_CB17
Public database	OK564707		850	partial, RdRp		2019	United Kingdom	England		feces	Waterbird gammacoronavirus 1	Abbotsbury-bird281	Abbotsbury-bird281		Anseriformes	Anatidae	Cygnus	Cygnus olor	yes	Coronaviridae	Orthocoronavirinae	Gammacoronavirus	Brangacovirus	Gammacoronavirus_brantae	BcanCoV_CB17	Gamma_CB17
Public database	OK564709		859	partial, RdRp			United Kingdom	England		feces	Waterbird gammacoronavirus 1	Abbotsbury-muteswan256	Abbotsbury-muteswan256	Cygnus olor	Anseriformes	Anatidae	Cygnus	Cygnus olor	yes	Coronaviridae	Orthocoronavirinae	Gammacoronavirus	Brangacovirus	Gammacoronavirus_brantae	BcanCoV_CB17	Gamma_CB17
Public database	OK564710		857	partial, RdRp		2015	United Kingdom	England		feces	Waterbird gammacoronavirus 1	Abbotsbury-muteswan8	Abbotsbury-muteswan8	Cygnus olor	Anseriformes	Anatidae	Cygnus	Cygnus olor	yes	Coronaviridae	Orthocoronavirinae	Gammacoronavirus	Brangacovirus	Gammacoronavirus_brantae	BcanCoV_CB17	Gamma_CB17
Public database	OK564711		890	partial, RdRp		2015	United Kingdom	England		feces	Waterbird gammacoronavirus 1	Abbotsbury-muteswan4	Abbotsbury-muteswan4	Cygnus olor	Anseriformes	Anatidae	Cygnus	Cygnus olor	yes	Coronaviridae	Orthocoronavirinae	Gammacoronavirus	Brangacovirus	Gammacoronavirus_brantae	BcanCoV_CB17	Gamma_CB17
Public database	OK564712		831	partial, RdRp		2020	United Kingdom	England		feces	Waterbird gammacoronavirus 1	Abbotsbury-bird308	Abbotsbury-bird308		Anseriformes	Anatidae	Cygnus	Cygnus olor	yes	Coronaviridae	Orthocoronavirinae	Gammacoronavirus	Brangacovirus	Gammacoronavirus_brantae	BcanCoV_CB17	Gamma_CB17
Public database	OK564713		739	partial, RdRp			United Kingdom	England		feces	Waterbird gammacoronavirus 1	Abbotsbury-muteswan227	Abbotsbury-muteswan227	Cygnus olor	Anseriformes	Anatidae	Cygnus	Cygnus olor	yes	Coronaviridae	Orthocoronavirinae	Gammacoronavirus	Brangacovirus	Gammacoronavirus_brantae	BcanCoV_CB17	Gamma_CB17
Public database	OK564716		830	partial, RdRp		2015	United Kingdom	England		feces	Waterbird gammacoronavirus 1	Abbotsbury-muteswan207	Abbotsbury-muteswan207	Cygnus olor	Anseriformes	Anatidae	Cygnus	Cygnus olor	yes	Coronaviridae	Orthocoronavirinae	Gammacoronavirus	Brangacovirus	Gammacoronavirus_brantae	BcanCoV_CB17	Gamma_CB17
Public database	OK564717		729	partial, RdRp		2015	United Kingdom	England		feces	Waterbird gammacoronavirus 1	Abbotsbury-muteswan171	Abbotsbury-muteswan171	Cygnus olor	Anseriformes	Anatidae	Cygnus	Cygnus olor	yes	Coronaviridae	Orthocoronavirinae	Gammacoronavirus	Brangacovirus	Gammacoronavirus_brantae	BcanCoV_CB17	Gamma_CB17
Public database	OK564718		754	partial, RdRp		2020	United Kingdom	England		feces	Waterbird gammacoronavirus 1	Abbotsbury-muteswan15	Abbotsbury-muteswan15	Cygnus olor	Anseriformes	Anatidae	Cygnus	Cygnus olor	yes	Coronaviridae	Orthocoronavirinae	Gammacoronavirus	Brangacovirus	Gammacoronavirus_brantae	BcanCoV_CB17	Gamma_CB17
Public database	OK564719		813	partial, RdRp			United Kingdom	England		feces	Waterbird gammacoronavirus 1	Abbotsbury-muteswan257	Abbotsbury-muteswan257	Cygnus olor	Anseriformes	Anatidae	Cygnus	Cygnus olor	yes	Coronaviridae	Orthocoronavirinae	Gammacoronavirus	Brangacovirus	Gammacoronavirus_brantae	BcanCoV_CB17	Gamma_CB17
Public database	OK564720		821	partial, RdRp		2015	United Kingdom	England		feces	Waterbird gammacoronavirus 1	Abbotsbury-muteswan208	Abbotsbury-muteswan208	Cygnus olor	Anseriformes	Anatidae	Cygnus	Cygnus olor	yes	Coronaviridae	Orthocoronavirinae	Gammacoronavirus	Brangacovirus	Gammacoronavirus_brantae	BcanCoV_CB17	Gamma_CB17
Public database	OK564721		834	partial, RdRp		2015	United Kingdom	England		feces	Waterbird gammacoronavirus 1	Abbotsbury-muteswan209	Abbotsbury-muteswan209	Cygnus olor	Anseriformes	Anatidae	Cygnus	Cygnus olor	yes	Coronaviridae	Orthocoronavirinae	Gammacoronavirus	Brangacovirus	Gammacoronavirus_brantae	BcanCoV_CB17	Gamma_CB17
Public database	OK564722		945	partial, RdRp		2020	United Kingdom	England		feces	Waterbird gammacoronavirus 1	Abbotsbury-muteswan261	Abbotsbury-muteswan261	Cygnus olor	Anseriformes	Anatidae	Cygnus	Cygnus olor	yes	Coronaviridae	Orthocoronavirinae	Gammacoronavirus	Brangacovirus	Gammacoronavirus_brantae	BcanCoV_CB17	Gamma_CB17
Public database	OK564723		920	partial, RdRp			United Kingdom	England		feces	Waterbird gammacoronavirus 1	Abbotsbury-muteswan193	Abbotsbury-muteswan193	Cygnus olor	Anseriformes	Anatidae	Cygnus	Cygnus olor	yes	Coronaviridae	Orthocoronavirinae	Gammacoronavirus	Brangacovirus	Gammacoronavirus_brantae	BcanCoV_CB17	Gamma_CB17
Public database	OK564724		920	partial, RdRp			United Kingdom	England		feces	Waterbird gammacoronavirus 1	Abbotsbury-muteswan223	Abbotsbury-muteswan223	Cygnus olor	Anseriformes	Anatidae	Cygnus	Cygnus olor	yes	Coronaviridae	Orthocoronavirinae	Gammacoronavirus	Brangacovirus	Gammacoronavirus_brantae	BcanCoV_CB17	Gamma_CB17
Public database	OK564725		920	partial, RdRp			United Kingdom	England		feces	Waterbird gammacoronavirus 1	Abbotsbury-muteswan229	Abbotsbury-muteswan229	Cygnus olor	Anseriformes	Anatidae	Cygnus	Cygnus olor	yes	Coronaviridae	Orthocoronavirinae	Gammacoronavirus	Brangacovirus	Gammacoronavirus_brantae	BcanCoV_CB17	Gamma_CB17
Public database	OK564726		920	partial, RdRp		2019	United Kingdom	England		feces	Waterbird gammacoronavirus 1	Abbotsbury-bird273	Abbotsbury-bird273		Anseriformes	Anatidae	Cygnus	Cygnus olor	yes	Coronaviridae	Orthocoronavirinae	Gammacoronavirus	Brangacovirus	Gammacoronavirus_brantae	BcanCoV_CB17	Gamma_CB17
Public database	OK564727		728	partial, RdRp		2020	United Kingdom	England		feces	Waterbird gammacoronavirus 1	Abbotsbury-bird328	Abbotsbury-bird328		Anseriformes	Anatidae	Cygnus	Cygnus olor	yes	Coronaviridae	Orthocoronavirinae	Gammacoronavirus	Brangacovirus	Gammacoronavirus_brantae	BcanCoV_CB17	Gamma_CB17
Public database	OK564728		727	partial, RdRp		2020	United Kingdom	England		feces	Waterbird gammacoronavirus 1	Abbotsbury-bird322	Abbotsbury-bird322		Anseriformes	Anatidae	Cygnus	Cygnus olor	yes	Coronaviridae	Orthocoronavirinae	Gammacoronavirus	Brangacovirus	Gammacoronavirus_brantae	BcanCoV_CB17	Gamma_CB17
Public database	OK564729		734	partial, RdRp			United Kingdom	England		feces	Waterbird gammacoronavirus 1	Abbotsbury-muteswan225	Abbotsbury-muteswan225	Cygnus olor	Anseriformes	Anatidae	Cygnus	Cygnus olor	yes	Coronaviridae	Orthocoronavirinae	Gammacoronavirus	Brangacovirus	Gammacoronavirus_brantae	BcanCoV_CB17	Gamma_CB17
Public database	OK564730		909	partial, RdRp		2016	United Kingdom	England		feces	Waterbird gammacoronavirus 1	Abbotsbury-muteswan13	Abbotsbury-muteswan13	Cygnus olor	Anseriformes	Anatidae	Cygnus	Cygnus olor	yes	Coronaviridae	Orthocoronavirinae	Gammacoronavirus	Brangacovirus	Gammacoronavirus_brantae	BcanCoV_CB17	Gamma_CB17
Public database	OK564731		756	partial, RdRp		2015	United Kingdom	England		feces	Waterbird gammacoronavirus 1	Abbotsbury-muteswan7	Abbotsbury-muteswan7	Cygnus olor	Anseriformes	Anatidae	Cygnus	Cygnus olor	yes	Coronaviridae	Orthocoronavirinae	Gammacoronavirus	Brangacovirus	Gammacoronavirus_brantae	BcanCoV_CB17	Gamma_CB17
Public database	OK564732		739	partial, RdRp		2016	United Kingdom	England		feces	Waterbird gammacoronavirus 1	Abbotsbury-muteswan236	Abbotsbury-muteswan236	Cygnus olor	Anseriformes	Anatidae	Cygnus	Cygnus olor	yes	Coronaviridae	Orthocoronavirinae	Gammacoronavirus	Brangacovirus	Gammacoronavirus_brantae	BcanCoV_CB17	Gamma_CB17
Public database	OK564733		822	partial, RdRp		2020	United Kingdom	England		feces	Waterbird gammacoronavirus 1	Abbotsbury-bird133	Abbotsbury-bird133		Anseriformes	Anatidae	Cygnus	Cygnus olor	yes	Coronaviridae	Orthocoronavirinae	Gammacoronavirus	Brangacovirus	Gammacoronavirus_brantae	BcanCoV_CB17	Gamma_CB17
Public database	OK564734		770	partial, RdRp		2015	United Kingdom	England		feces	Waterbird gammacoronavirus 1	Abbotsbury-muteswan175	Abbotsbury-muteswan175	Cygnus olor	Anseriformes	Anatidae	Cygnus	Cygnus olor	yes	Coronaviridae	Orthocoronavirinae	Gammacoronavirus	Brangacovirus	Gammacoronavirus_brantae	BcanCoV_CB17	Gamma_CB17
Public database	KX588651		441	partial, RdRp		2013-08-14	Finland			cloacal swab, tracheal swab, oropharyngeal swab, or tissue	Avian coronavirus	AvCoV/Clangula_hyemalis/Finland/14395/2013		Clangula hyemalis	Charadriiformes	Laridae	Chroicocephalus	Chroicocephalus ridibundus		Coronaviridae	Orthocoronavirinae	Gammacoronavirus	Igacovirus	Unclassified-1 Igacovirus	Igacovirus sp1.
Public database	KT882617		425	partial, RdRp		2007	Sweden	Ottenby		fecal swab	Avian coronavirus	AvCoV/Aythya marila/67703/2007	AvCoV/Aythya marila/67703/2007	Aythya marila	Anseriformes	Anatidae	Aythya	Aythya marila	yes	Coronaviridae	Orthocoronavirinae	Gammacoronavirus	Igacovirus	Gammacoronavirus_Anatiscopes(NL3)	DuCoV_NL3	Gamma_NL3
Public database	MK617419		472	partial, RdRp		2012-08-12	Poland			Cloacal/fecal swab	Avian coronavirus	GammaCoV/AvCoV/Tufted_duck/Poland/Mor65/20/2012	GammaCoV/AvCoV/Tufted_duck/Poland/Mor65/20/2012	tufted duck	Anseriformes	Anatidae	Aythya	Aythya fuligula	yes	Coronaviridae	Orthocoronavirinae	Gammacoronavirus	Igacovirus	Gammacoronavirus_Anatiscopes(NL3)	DuCoV_NL3	Gamma_NL3
Public database	KT882615		428	partial, RdRp		2007	Sweden	Ottenby		fecal swab	Avian coronavirus	AvCoV/Aythya marila/67693/2007	AvCoV/Aythya marila/67693/2007	Aythya marila	Anseriformes	Anatidae	Aythya	Aythya marila	yes	Coronaviridae	Orthocoronavirinae	Gammacoronavirus	Igacovirus	Gammacoronavirus_Anatiscopes(NL3)	DuCoV_NL3	Gamma_NL3
Public database	JN788847		360	partial, RdRp		2010-01-12	China	Hong Kong	Mai Po Marshes	Cloacal swabs	Avian coronavirus	J1482/Aythya fuligula/100112	J1482/Aythya fuligula/100112	Aythya fuligula	Anseriformes	Anatidae	Aythya	Aythya fuligula	yes	Coronaviridae	Orthocoronavirinae	Gammacoronavirus	Igacovirus	Gammacoronavirus_Anatiscopes(NL3)	DuCoV_NL3	Gamma_NL3
Public database	OM970096		547	partial, RdRp		2020	Russia				Gammacoronavirus sp.	ACoV/common scoter/YaNAO-Russia/M21411/2020	ACoV/common scoter/YaNAO-Russia/M21411/2020	Melanitta nigra	Anseriformes	Anatidae	Melanitta	Melanitta nigra	yes	Coronaviridae	Orthocoronavirinae	Gammacoronavirus	Igacovirus	Gammacoronavirus_Anatiscopes(NL3)	DuCoV_NL3	Gamma_NL3
Public database	OQ731830		457	partial, RdRp		2021-09-05	Russia	Novosibirsk region, Karasuk district			Avian coronavirus	AvCoV/Gadwall/Karasuk/5163a/2021	AvCoV/Gadwall/Karasuk/5163a/2021	Mareca strepera	Anseriformes	Anatidae	Mareca	Mareca penelope	yes	Coronaviridae	Orthocoronavirinae	Gammacoronavirus	Igacovirus	Gammacoronavirus_Anatiscopes(NL3)	DuCoV_NL3	Gamma_NL3
Public database	OQ731828		514	partial, RdRp		2021-09-05	Russia	Novosibirsk region, Karasuk district			Avian coronavirus	AvCoV/Garganey/Karasuk/5155a/2021	AvCoV/Garganey/Karasuk/5155a/2021	Spatula querquedula	Anseriformes	Anatidae	Spatula	Spatula querquedula	yes	Coronaviridae	Orthocoronavirinae	Gammacoronavirus	Igacovirus	Gammacoronavirus_Anatiscopes(NL3)	DuCoV_NL3	Gamma_NL3
Public database	OM970099		547	partial, RdRp		2020	Russia				Gammacoronavirus sp.	ACoV/common teal/YaNAO-Russia/M2133/2020	ACoV/common teal/YaNAO-Russia/M2133/2020	Anas acuta	Anseriformes	Anatidae	Anas	Anas acuta	yes	Coronaviridae	Orthocoronavirinae	Gammacoronavirus	Igacovirus	Gammacoronavirus_Anatiscopes(NL3)	DuCoV_NL3	Gamma_NL3
Public database	OM970100		547	partial, RdRp		2020	Russia				Gammacoronavirus sp.	ACoV/common merganser/YaNAO-Russia/M2132/2020	ACoV/common merganser/YaNAO-Russia/M2132/2020	Mergus merganser	Anseriformes	Anatidae	Mergus	Mergus merganser	yes	Coronaviridae	Orthocoronavirinae	Gammacoronavirus	Igacovirus	Gammacoronavirus_Anatiscopes(NL3)	DuCoV_NL3	Gamma_NL3
Public database	OM970098		547	partial, RdRp		2020	Russia				Gammacoronavirus sp.	ACoV/tufted duck/YaNAO-Russia/M2135/2020	ACoV/tufted duck/YaNAO-Russia/M2135/2020	Aythya fuligula	Anseriformes	Anatidae	Aythya	Aythya fuligula	yes	Coronaviridae	Orthocoronavirinae	Gammacoronavirus	Igacovirus	Gammacoronavirus_Anatiscopes(NL3)	DuCoV_NL3	Gamma_NL3
Public database	OM970112		382	partial, RdRp		2020	Russia				Gammacoronavirus sp.	ACoV/eurasian wigeon/YaNAO-Russia/M2328/2020	ACoV/eurasian wigeon/YaNAO-Russia/M2328/2020	Mareca penelope	Anseriformes	Anatidae	Mareca	Mareca penelope	yes	Coronaviridae	Orthocoronavirinae	Gammacoronavirus	Igacovirus	Gammacoronavirus_Anatiscopes(NL3)	DuCoV_NL3	Gamma_NL3
Public database	KF437678		360	partial, RdRp		2012	South Korea			oropharyngeal swab	Avian coronavirus	12WB70	12WB70	Anas poecilorhyncha (spot-billed duck)	Anseriformes	Anatidae	Anas	Anas platyrhynchos	yes	Coronaviridae	Orthocoronavirinae	Gammacoronavirus	Igacovirus	Gammacoronavirus_Anatiscopes(NL3)	DuCoV_NL3	Gamma_NL3
Public database	MT944379		419	partial, RdRp		2019-10-10	China	Hebei		swab samples	Duck coronavirus	DuCoV/chicken/Guangxi/E2180/2019		chicken	Galliformes	Phasianidae	Gallus	Gallus gallus		Coronaviridae	Orthocoronavirinae	Gammacoronavirus	Igacovirus	Gammacoronavirus_Anatiscopes(NL3)	DuCoV_NL3	Gamma_NL3
Public database	MT944380		419	partial, RdRp		2019-10-10	China	Hebei		swab samples	Duck coronavirus	DuCoV/chicken/Hebei/B2385/2019		chicken	Galliformes	Phasianidae	Gallus	Gallus gallus		Coronaviridae	Orthocoronavirinae	Gammacoronavirus	Igacovirus	Gammacoronavirus_Anatiscopes(NL3)	DuCoV_NL3	Gamma_NL3
Public database	MT944381		419	partial, RdRp		2019-10-10	China	Hebei		swab samples	Duck coronavirus	DuCoV/chicken/Hebei/B2388/2019		chicken	Galliformes	Phasianidae	Gallus	Gallus gallus		Coronaviridae	Orthocoronavirinae	Gammacoronavirus	Igacovirus	Gammacoronavirus_Anatiscopes(NL3)	DuCoV_NL3	Gamma_NL3
Public database	MT944382		419	partial, RdRp		2019-10-10	China	Hebei		swab samples	Duck coronavirus	DuCoV/chicken/Hebei/B2401/2019		chicken	Galliformes	Phasianidae	Gallus	Gallus gallus		Coronaviridae	Orthocoronavirinae	Gammacoronavirus	Igacovirus	Gammacoronavirus_Anatiscopes(NL3)	DuCoV_NL3	Gamma_NL3
Public database	MT944383		419	partial, RdRp		2019-10-10	China	Hebei		swab samples	Duck coronavirus	DuCoV/chicken/Hebei/B2408/2019		chicken	Galliformes	Phasianidae	Gallus	Gallus gallus		Coronaviridae	Orthocoronavirinae	Gammacoronavirus	Igacovirus	Gammacoronavirus_Anatiscopes(NL3)	DuCoV_NL3	Gamma_NL3
Public database	MT944384		419	partial, RdRp		2019-10-10	China	Hebei		swab samples	Duck coronavirus	DuCoV/chicken/Hebei/B2430/2019		chicken	Galliformes	Phasianidae	Gallus	Gallus gallus		Coronaviridae	Orthocoronavirinae	Gammacoronavirus	Igacovirus	Gammacoronavirus_Anatiscopes(NL3)	DuCoV_NL3	Gamma_NL3
Public database	OQ731818		508	partial, RdRp		2021-09-12	Russia	Sakhalin region, Okhinsky city district			Avian coronavirus	AvCoV/European wigeon/Sakhalin/212m/2021	AvCoV/European wigeon/Sakhalin/212m/2021	Mareca penelope	Anseriformes	Anatidae	Mareca	Mareca penelope	yes	Coronaviridae	Orthocoronavirinae	Gammacoronavirus	Igacovirus	Gammacoronavirus_Anatiscopes(NL3)	DuCoV_NL3	Gamma_NL3
Public database	OQ731824		414	partial, RdRp		2021-09-05	Russia	Sakhalin region, Okhinsky city district			Avian coronavirus	AvCoV/Common teal/Sakhalin/4m/2021	AvCoV/Common teal/Sakhalin/4m/2021	Anas crecca	Anseriformes	Anatidae	Anas	Anas crecca	yes	Coronaviridae	Orthocoronavirinae	Gammacoronavirus	Igacovirus	Gammacoronavirus_Anatiscopes(NL3)	DuCoV_NL3	Gamma_NL3
Public database	KU321640		225	partial, RdRp		2009-11-18	Brazil	Lagoa do Peixe National Park, RS		oral/cloacal swab	Calidris alba coronavirus	PNLP100	PNLP100	Calidris alba	Charadriiformes	Scolopacidae	Calidris	Calidris alba	yes	Coronaviridae	Orthocoronavirinae	Gammacoronavirus	Igacovirus	Gammacoronavirus_Anatiscopes(NL3)	DuCoV_NL3	Gamma_NL3
Public database	KU321642		225	partial, RdRp		2009-11-19	Brazil	Lagoa do Peixe National Park, RS		oral/cloacal swab	Calidris fuscicollis coronavirus	PNLP159	PNLP159	Calidris fuscicollis	Charadriiformes	Scolopacidae	Calidris	Calidris fuscicollis	yes	Coronaviridae	Orthocoronavirinae	Gammacoronavirus	Igacovirus	Gammacoronavirus_Anatiscopes(NL3)	DuCoV_NL3	Gamma_NL3
Public database	GU396675		535	partial, RdRp		2005-08-01	Russia	Kolyuchin		faecal and cloacal sample	Western sandpiper coronavirus KR-28			western sandpiper	Charadriiformes	Scolopacidae	Calidris	Calidris mauri	yes	Coronaviridae	Orthocoronavirinae	Gammacoronavirus	Igacovirus	Gammacoronavirus_Anatiscopes(NL3)	DuCoV_NL3	Gamma_NL3
Public database	MG764137		553	partial, RdRp		2016-11-18	Australia	Tasmania		Oropharyngeal and cloacal swabs	Avian coronavirus	CoV-9564-2016/11/18-BB/TAS	CoV-9564-2016/11/18-BB/TAS	Arenaria interpres (ruddy turnstone)	Charadriiformes	Scolopacidae	Arenaria	Arenaria interpres	yes	Coronaviridae	Orthocoronavirinae	Gammacoronavirus	Igacovirus	Gammacoronavirus_Anatiscopes(NL3)	DuCoV_NL3	Gamma_NL3
Public database	GU396685		563	partial, RdRp		2005-08-01	Russia	Commander Island		faecal and cloacal sample	Rock sandpiper coronavirus CIR-665821			rock sandpiper	Charadriiformes	Scolopacidae	Calidris	Calidris ptilocnemis	yes	Coronaviridae	Orthocoronavirinae	Gammacoronavirus	Igacovirus	Gammacoronavirus_Anatiscopes(NL3)	DuCoV_NL3	Gamma_NL3
Public database	GU396687		562	partial, RdRp		2005-08-01	Russia	Commander Island		faecal and cloacal sample	Rock sandpiper coronavirus CIR-65824			rock sandpiper	Charadriiformes	Scolopacidae	Calidris	Calidris ptilocnemis	yes	Coronaviridae	Orthocoronavirinae	Gammacoronavirus	Igacovirus	Gammacoronavirus_Anatiscopes(NL3)	DuCoV_NL3	Gamma_NL3
Public database	GU396688		562	partial, RdRp		2005-08-01	Russia	Commander Island		faecal and cloacal sample	Rock sandpiper coronavirus CIR-65828			rock sandpiper	Charadriiformes	Scolopacidae	Calidris	Calidris ptilocnemis	yes	Coronaviridae	Orthocoronavirinae	Gammacoronavirus	Igacovirus	Gammacoronavirus_Anatiscopes(NL3)	DuCoV_NL3	Gamma_NL3
Public database	GU396689		562	partial, RdRp		2005-08-01	Russia	Commander Island		faecal and cloacal sample	Rock sandpiper coronavirus CIR-65885			rock sandpiper	Charadriiformes	Scolopacidae	Calidris	Calidris ptilocnemis	yes	Coronaviridae	Orthocoronavirinae	Gammacoronavirus	Igacovirus	Gammacoronavirus_Anatiscopes(NL3)	DuCoV_NL3	Gamma_NL3
Public database	KT882619		355	partial, RdRp		2007	Sweden	Ottenby		fecal swab	Avian coronavirus	AvCoV/Anas platyrhynchos/69969/2007	AvCoV/Anas platyrhynchos/69969/2007	Anas platyrhynchos	Anseriformes	Anatidae	Anas	Anas platyrhynchos	yes	Coronaviridae	Orthocoronavirinae	Gammacoronavirus	Igacovirus	Gammacoronavirus_Anatiscopes(NL3)	DuCoV_NL3	Gamma_NL3
Public database	MT083269		387	partial, RdRp		2015-11-24	Nepal			oral swab	Duck coronavirus	PREDICT_NPAI0035	PREDICT_NPAI0035	Anas platyrhynchos	Anseriformes	Anatidae	Anas	Anas platyrhynchos	yes	Coronaviridae	Orthocoronavirinae	Gammacoronavirus	Igacovirus	Gammacoronavirus_Anatiscopes(NL3)	DuCoV_NL3	Gamma_NL3
Public database	MT083270		387	partial, RdRp		2015-11-24	Nepal			oral swab	Duck coronavirus	PREDICT_NPAI0036	PREDICT_NPAI0036	Anas platyrhynchos	Anseriformes	Anatidae	Anas	Anas platyrhynchos	yes	Coronaviridae	Orthocoronavirinae	Gammacoronavirus	Igacovirus	Gammacoronavirus_Anatiscopes(NL3)	DuCoV_NL3	Gamma_NL3
Public database	MT083265		387	partial, RdRp		2015-11-18	Nepal			oral swab	Duck coronavirus	PREDICT_NPAI0013	PREDICT_NPAI0013	Anas platyrhynchos	Anseriformes	Anatidae	Anas	Anas platyrhynchos	yes	Coronaviridae	Orthocoronavirinae	Gammacoronavirus	Igacovirus	Gammacoronavirus_Anatiscopes(NL3)	DuCoV_NL3	Gamma_NL3
Public database	MT083274		393	partial, RdRp		2015-11-25	Nepal			oral swab	Duck coronavirus	PREDICT_NPAI0045	PREDICT_NPAI0045	Anas platyrhynchos	Anseriformes	Anatidae	Anas	Anas platyrhynchos	yes	Coronaviridae	Orthocoronavirinae	Gammacoronavirus	Igacovirus	Gammacoronavirus_Anatiscopes(NL3)	DuCoV_NL3	Gamma_NL3
Public database	MT083268		387	partial, RdRp		2015-11-24	Nepal			oral swab	Duck coronavirus	PREDICT_NPAI0026	PREDICT_NPAI0026	Anas platyrhynchos	Anseriformes	Anatidae	Anas	Anas platyrhynchos	yes	Coronaviridae	Orthocoronavirinae	Gammacoronavirus	Igacovirus	Gammacoronavirus_Anatiscopes(NL3)	DuCoV_NL3	Gamma_NL3
Public database	MT083273		387	partial, RdRp		2015-11-25	Nepal			oral swab	Duck coronavirus	PREDICT_NPAI0041	PREDICT_NPAI0041	Anas platyrhynchos	Anseriformes	Anatidae	Anas	Anas platyrhynchos	yes	Coronaviridae	Orthocoronavirinae	Gammacoronavirus	Igacovirus	Gammacoronavirus_Anatiscopes(NL3)	DuCoV_NL3	Gamma_NL3
Public database	MT083267		387	partial, RdRp		2015-11-18	Nepal			oral swab	Duck coronavirus	PREDICT_NPAI0017	PREDICT_NPAI0017	Anas platyrhynchos	Anseriformes	Anatidae	Anas	Anas platyrhynchos	yes	Coronaviridae	Orthocoronavirinae	Gammacoronavirus	Igacovirus	Gammacoronavirus_Anatiscopes(NL3)	DuCoV_NL3	Gamma_NL3
Public database	MT083266		387	partial, RdRp		2015-11-18	Nepal			oral swab	Duck coronavirus	PREDICT_NPAI0015	PREDICT_NPAI0015	Anas platyrhynchos	Anseriformes	Anatidae	Anas	Anas platyrhynchos	yes	Coronaviridae	Orthocoronavirinae	Gammacoronavirus	Igacovirus	Gammacoronavirus_Anatiscopes(NL3)	DuCoV_NL3	Gamma_NL3
Public database	MT083271		387	partial, RdRp		2015-11-25	Nepal			oral swab	Duck coronavirus	PREDICT_NPAI0039	PREDICT_NPAI0039	Anas platyrhynchos	Anseriformes	Anatidae	Anas	Anas platyrhynchos	yes	Coronaviridae	Orthocoronavirinae	Gammacoronavirus	Igacovirus	Gammacoronavirus_Anatiscopes(NL3)	DuCoV_NL3	Gamma_NL3
Public database	MT083272		387	partial, RdRp		2015-11-25	Nepal			oral swab	Duck coronavirus	PREDICT_NPAI0040	PREDICT_NPAI0040	Anas platyrhynchos	Anseriformes	Anatidae	Anas	Anas platyrhynchos	yes	Coronaviridae	Orthocoronavirinae	Gammacoronavirus	Igacovirus	Gammacoronavirus_Anatiscopes(NL3)	DuCoV_NL3	Gamma_NL3
Public database	OM970109		547	partial, RdRp		2020	Russia				Gammacoronavirus sp.	ACoV/rook/Novosibirsk/M20522/2020	ACoV/rook/Novosibirsk/M20522/2020	Corvus frugilegus	Passeriformes	Corvidae	Corvus	Corvus frugilegus	yes	Coronaviridae	Orthocoronavirinae	Gammacoronavirus	Igacovirus	Gammacoronavirus_Anatiscopes(NL3)	DuCoV_NL3	Gamma_NL3
Public database	KY320404		500	partial, RdRp		2015-01-12	Sweden	Uppsala		fecal swab	Avian coronavirus	937_Sweden_2015	937_Sweden_2015	Anas platyrhynchos	Anseriformes	Anatidae	Anas	Anas platyrhynchos	yes	Coronaviridae	Orthocoronavirinae	Gammacoronavirus	Igacovirus	Gammacoronavirus_Anatiscopes(NL3)	DuCoV_NL3	Gamma_NL3
Public database	KY320401		500	partial, RdRp		2015-01-12	Sweden	Uppsala		fecal swab	Avian coronavirus	937_Sweden_2015	937_Sweden_2015	Anas platyrhynchos	Anseriformes	Anatidae	Anas	Anas platyrhynchos	yes	Coronaviridae	Orthocoronavirinae	Gammacoronavirus	Igacovirus	Gammacoronavirus_Anatiscopes(NL3)	DuCoV_NL3	Gamma_NL3
Public database	OQ731809		492	partial, RdRp		2021-09-11	Russia	Sakhalin region, Okhinsky city district			Avian coronavirus	AvCoV/Common teal/Sakhalin/129m/2021	AvCoV/Common teal/Sakhalin/129m/2021	Anas crecca	Anseriformes	Anatidae	Anas	Anas crecca	yes	Coronaviridae	Orthocoronavirinae	Gammacoronavirus	Igacovirus	Gammacoronavirus_Anatiscopes(NL3)	DuCoV_NL3	Gamma_NL3
Public database	ON605848		395	partial, RdRp		2020	Russia				Gammacoronavirus sp.	AvCoV/herring gull/Novosibirsk/M20512/2020	AvCoV/herring gull/Novosibirsk/M20512/2020	herring gull	Charadriiformes	Laridae	Larus	Larus argentatus	yes	Coronaviridae	Orthocoronavirinae	Gammacoronavirus	Igacovirus	Gammacoronavirus_Anatiscopes(NL3)	DuCoV_NL3	Gamma_NL3
Public database	MG764093		395	partial, RdRp		2016-12-30	Australia	Victoria		Oropharyngeal and cloacal swabs	Avian coronavirus	CoV-9822-2016/12/30-WS/VIC	CoV-9822-2016/12/30-WS/VIC	Calidris ferruginea (curlew sandpiper)	Charadriiformes	Scolopacidae	Calidris	Calidris ferruginea	yes	Coronaviridae	Orthocoronavirinae	Gammacoronavirus	Igacovirus	Gammacoronavirus_Anatiscopes(NL3)	DuCoV_NL3	Gamma_NL3
Public database	MG764091		560	partial, RdRp		2016-12-28	Australia	Victoria		Oropharyngeal and cloacal swabs	Avian coronavirus	CoV-9776-2016/12/28-WS/VIC	CoV-9776-2016/12/28-WS/VIC	Calidris ferruginea (curlew sandpiper)	Charadriiformes	Scolopacidae	Calidris	Calidris ferruginea	yes	Coronaviridae	Orthocoronavirinae	Gammacoronavirus	Igacovirus	Gammacoronavirus_Anatiscopes(NL3)	DuCoV_NL3	Gamma_NL3
Public database	MG764092		560	partial, RdRp		2016-12-30	Australia	Victoria		Oropharyngeal and cloacal swabs	Avian coronavirus	CoV-9819-2016/12/30-WS/VIC	CoV-9819-2016/12/30-WS/VIC	Calidris ferruginea (curlew sandpiper)	Charadriiformes	Scolopacidae	Calidris	Calidris ferruginea	yes	Coronaviridae	Orthocoronavirinae	Gammacoronavirus	Igacovirus	Gammacoronavirus_Anatiscopes(NL3)	DuCoV_NL3	Gamma_NL3
Public database	MN623247		222	partial, RdRp		2019	Brazil	north, northeast, midwest, south, and southeast Brazil		orotracheal swab	Avian coronavirus	AvCoV/Anas bahamensis/Brazil/PNRJ46/2019	AvCoV/Anas bahamensis/Brazil/PNRJ46/2019	Anas bahamensis	Anseriformes	Anatidae	Anas	Anas bahamensis	yes	Coronaviridae	Orthocoronavirinae	Gammacoronavirus	Igacovirus	Gammacoronavirus_Anatiscopes(NL3)	DuCoV_NL3	Gamma_NL3
Public database	MH496830		427	partial, RdRp		2015	Laos	Vientiane	(Sikhottabong and Xaythani Districts	Cloacal swabs , oral/tracheal swabs	Avian coronavirus	AvCoV/chicken/Lao PDR/LAO15_A_11222/2015	AvCoV/chicken/Lao PDR/LAO15_A_11222/2015	chicken	Galliformes	Phasianidae	Gallus	Gallus gallus		Coronaviridae	Orthocoronavirinae	Gammacoronavirus	Igacovirus	Gammacoronavirus_Anatiscopes(NL3)	DuCoV_NL3	Gamma_NL3
Public database	MH496856		394	partial, RdRp		2015	Laos	Vientiane	(Sikhottabong and Xaythani Districts	Cloacal swabs , oral/tracheal swabs	Avian coronavirus	AvCoV/chicken/Lao PDR/LAO15_A_11222/2015	AvCoV/chicken/Lao PDR/LAO15_A_11222/2015	duck	Galliformes	Phasianidae	Gallus	Gallus gallus		Coronaviridae	Orthocoronavirinae	Gammacoronavirus	Igacovirus	Gammacoronavirus_Anatiscopes(NL3)	DuCoV_NL3	Gamma_NL3
Public database	MH496857		394	partial, RdRp		2015	Laos	Vientiane	(Sikhottabong and Xaythani Districts	Cloacal swabs , oral/tracheal swabs	Avian coronavirus	AvCoV/chicken/Lao PDR/LAO15_A_11222/2015	AvCoV/chicken/Lao PDR/LAO15_A_11222/2015	duck	Galliformes	Phasianidae	Gallus	Gallus gallus		Coronaviridae	Orthocoronavirinae	Gammacoronavirus	Igacovirus	Gammacoronavirus_Anatiscopes(NL3)	DuCoV_NL3	Gamma_NL3
Public database	MH496858		394	partial, RdRp		2015	Laos	Vientiane	(Sikhottabong and Xaythani Districts	Cloacal swabs , oral/tracheal swabs	Avian coronavirus	AvCoV/chicken/Lao PDR/LAO15_A_11222/2015	AvCoV/chicken/Lao PDR/LAO15_A_11222/2015	duck	Galliformes	Phasianidae	Gallus	Gallus gallus		Coronaviridae	Orthocoronavirinae	Gammacoronavirus	Igacovirus	Gammacoronavirus_Anatiscopes(NL3)	DuCoV_NL3	Gamma_NL3
Public database	MH496859		394	partial, RdRp		2015	Laos	Vientiane	(Sikhottabong and Xaythani Districts	Cloacal swabs , oral/tracheal swabs	Avian coronavirus	AvCoV/chicken/Lao PDR/LAO15_A_11222/2015	AvCoV/chicken/Lao PDR/LAO15_A_11222/2015	duck	Galliformes	Phasianidae	Gallus	Gallus gallus		Coronaviridae	Orthocoronavirinae	Gammacoronavirus	Igacovirus	Gammacoronavirus_Anatiscopes(NL3)	DuCoV_NL3	Gamma_NL3
Public database	MH496860		394	partial, RdRp		2015	Laos	Vientiane	(Sikhottabong and Xaythani Districts	Cloacal swabs , oral/tracheal swabs	Avian coronavirus	AvCoV/chicken/Lao PDR/LAO15_A_11222/2015	AvCoV/chicken/Lao PDR/LAO15_A_11222/2015	duck	Galliformes	Phasianidae	Gallus	Gallus gallus		Coronaviridae	Orthocoronavirinae	Gammacoronavirus	Igacovirus	Gammacoronavirus_Anatiscopes(NL3)	DuCoV_NL3	Gamma_NL3
Public database	MH496861		394	partial, RdRp		2015	Laos	Vientiane	(Sikhottabong and Xaythani Districts	Cloacal swabs , oral/tracheal swabs	Avian coronavirus	AvCoV/chicken/Lao PDR/LAO15_A_11222/2015	AvCoV/chicken/Lao PDR/LAO15_A_11222/2015	duck	Galliformes	Phasianidae	Gallus	Gallus gallus		Coronaviridae	Orthocoronavirinae	Gammacoronavirus	Igacovirus	Gammacoronavirus_Anatiscopes(NL3)	DuCoV_NL3	Gamma_NL3
Public database	MH496862		394	partial, RdRp		2015	Laos	Vientiane	(Sikhottabong and Xaythani Districts	Cloacal swabs , oral/tracheal swabs	Avian coronavirus	AvCoV/chicken/Lao PDR/LAO15_A_11222/2015	AvCoV/chicken/Lao PDR/LAO15_A_11222/2015	duck	Galliformes	Phasianidae	Gallus	Gallus gallus		Coronaviridae	Orthocoronavirinae	Gammacoronavirus	Igacovirus	Gammacoronavirus_Anatiscopes(NL3)	DuCoV_NL3	Gamma_NL3
Public database	MH496863		394	partial, RdRp		2015	Laos	Vientiane	(Sikhottabong and Xaythani Districts	Cloacal swabs , oral/tracheal swabs	Avian coronavirus	AvCoV/chicken/Lao PDR/LAO15_A_11222/2015	AvCoV/chicken/Lao PDR/LAO15_A_11222/2015	duck	Galliformes	Phasianidae	Gallus	Gallus gallus		Coronaviridae	Orthocoronavirinae	Gammacoronavirus	Igacovirus	Gammacoronavirus_Anatiscopes(NL3)	DuCoV_NL3	Gamma_NL3
Public database	MH496864		394	partial, RdRp		2015	Laos	Vientiane	(Sikhottabong and Xaythani Districts	Cloacal swabs , oral/tracheal swabs	Avian coronavirus	AvCoV/chicken/Lao PDR/LAO15_A_11222/2015	AvCoV/chicken/Lao PDR/LAO15_A_11222/2015	duck	Galliformes	Phasianidae	Gallus	Gallus gallus		Coronaviridae	Orthocoronavirinae	Gammacoronavirus	Igacovirus	Gammacoronavirus_Anatiscopes(NL3)	DuCoV_NL3	Gamma_NL3
Public database	MH496865		394	partial, RdRp		2015	Laos	Vientiane	(Sikhottabong and Xaythani Districts	Cloacal swabs , oral/tracheal swabs	Avian coronavirus	AvCoV/chicken/Lao PDR/LAO15_A_11222/2015	AvCoV/chicken/Lao PDR/LAO15_A_11222/2015	duck	Galliformes	Phasianidae	Gallus	Gallus gallus		Coronaviridae	Orthocoronavirinae	Gammacoronavirus	Igacovirus	Gammacoronavirus_Anatiscopes(NL3)	DuCoV_NL3	Gamma_NL3
Public database	MH496866		394	partial, RdRp		2015	Laos	Vientiane	(Sikhottabong and Xaythani Districts	Cloacal swabs , oral/tracheal swabs	Avian coronavirus	AvCoV/chicken/Lao PDR/LAO15_A_11222/2015	AvCoV/chicken/Lao PDR/LAO15_A_11222/2015	duck	Galliformes	Phasianidae	Gallus	Gallus gallus		Coronaviridae	Orthocoronavirinae	Gammacoronavirus	Igacovirus	Gammacoronavirus_Anatiscopes(NL3)	DuCoV_NL3	Gamma_NL3
Public database	MH496867		394	partial, RdRp		2015	Laos	Vientiane	(Sikhottabong and Xaythani Districts	Cloacal swabs , oral/tracheal swabs	Avian coronavirus	AvCoV/chicken/Lao PDR/LAO15_A_11222/2015	AvCoV/chicken/Lao PDR/LAO15_A_11222/2015	duck	Galliformes	Phasianidae	Gallus	Gallus gallus		Coronaviridae	Orthocoronavirinae	Gammacoronavirus	Igacovirus	Gammacoronavirus_Anatiscopes(NL3)	DuCoV_NL3	Gamma_NL3
Public database	MH496868		394	partial, RdRp		2015	Laos	Vientiane	(Sikhottabong and Xaythani Districts	Cloacal swabs , oral/tracheal swabs	Avian coronavirus	AvCoV/chicken/Lao PDR/LAO15_A_11222/2015	AvCoV/chicken/Lao PDR/LAO15_A_11222/2015	duck	Galliformes	Phasianidae	Gallus	Gallus gallus		Coronaviridae	Orthocoronavirinae	Gammacoronavirus	Igacovirus	Gammacoronavirus_Anatiscopes(NL3)	DuCoV_NL3	Gamma_NL3
Public database	MH496869		394	partial, RdRp		2015	Laos	Vientiane	(Sikhottabong and Xaythani Districts	Cloacal swabs , oral/tracheal swabs	Avian coronavirus	AvCoV/chicken/Lao PDR/LAO15_A_11222/2015	AvCoV/chicken/Lao PDR/LAO15_A_11222/2015	duck	Galliformes	Phasianidae	Gallus	Gallus gallus		Coronaviridae	Orthocoronavirinae	Gammacoronavirus	Igacovirus	Gammacoronavirus_Anatiscopes(NL3)	DuCoV_NL3	Gamma_NL3
Public database	MH496870		394	partial, RdRp		2015	Laos	Vientiane	(Sikhottabong and Xaythani Districts	Cloacal swabs , oral/tracheal swabs	Avian coronavirus	AvCoV/chicken/Lao PDR/LAO15_A_11222/2015	AvCoV/chicken/Lao PDR/LAO15_A_11222/2015	duck	Galliformes	Phasianidae	Gallus	Gallus gallus		Coronaviridae	Orthocoronavirinae	Gammacoronavirus	Igacovirus	Gammacoronavirus_Anatiscopes(NL3)	DuCoV_NL3	Gamma_NL3
Public database	MH496871		394	partial, RdRp		2015	Laos	Vientiane	(Sikhottabong and Xaythani Districts	Cloacal swabs , oral/tracheal swabs	Avian coronavirus	AvCoV/chicken/Lao PDR/LAO15_A_11222/2015	AvCoV/chicken/Lao PDR/LAO15_A_11222/2015	duck	Galliformes	Phasianidae	Gallus	Gallus gallus		Coronaviridae	Orthocoronavirinae	Gammacoronavirus	Igacovirus	Gammacoronavirus_Anatiscopes(NL3)	DuCoV_NL3	Gamma_NL3
Public database	MH496872		394	partial, RdRp		2015	Laos	Vientiane	(Sikhottabong and Xaythani Districts	Cloacal swabs , oral/tracheal swabs	Avian coronavirus	AvCoV/chicken/Lao PDR/LAO15_A_11222/2015	AvCoV/chicken/Lao PDR/LAO15_A_11222/2015	duck	Galliformes	Phasianidae	Gallus	Gallus gallus		Coronaviridae	Orthocoronavirinae	Gammacoronavirus	Igacovirus	Gammacoronavirus_Anatiscopes(NL3)	DuCoV_NL3	Gamma_NL3
Public database	MH496873		394	partial, RdRp		2015	Laos	Vientiane	(Sikhottabong and Xaythani Districts	Cloacal swabs , oral/tracheal swabs	Avian coronavirus	AvCoV/chicken/Lao PDR/LAO15_A_11222/2015	AvCoV/chicken/Lao PDR/LAO15_A_11222/2015	duck	Galliformes	Phasianidae	Gallus	Gallus gallus		Coronaviridae	Orthocoronavirinae	Gammacoronavirus	Igacovirus	Gammacoronavirus_Anatiscopes(NL3)	DuCoV_NL3	Gamma_NL3
Public database	MH496874		394	partial, RdRp		2015	Laos	Vientiane	(Sikhottabong and Xaythani Districts	Cloacal swabs , oral/tracheal swabs	Avian coronavirus	AvCoV/chicken/Lao PDR/LAO15_A_11222/2015	AvCoV/chicken/Lao PDR/LAO15_A_11222/2015	duck	Galliformes	Phasianidae	Gallus	Gallus gallus		Coronaviridae	Orthocoronavirinae	Gammacoronavirus	Igacovirus	Gammacoronavirus_Anatiscopes(NL3)	DuCoV_NL3	Gamma_NL3
Public database	MH496875		394	partial, RdRp		2015	Laos	Vientiane	(Sikhottabong and Xaythani Districts	Cloacal swabs , oral/tracheal swabs	Avian coronavirus	AvCoV/chicken/Lao PDR/LAO15_A_11222/2015	AvCoV/chicken/Lao PDR/LAO15_A_11222/2015	duck	Galliformes	Phasianidae	Gallus	Gallus gallus		Coronaviridae	Orthocoronavirinae	Gammacoronavirus	Igacovirus	Gammacoronavirus_Anatiscopes(NL3)	DuCoV_NL3	Gamma_NL3
Public database	MH496876		394	partial, RdRp		2015	Laos	Vientiane	(Sikhottabong and Xaythani Districts	Cloacal swabs , oral/tracheal swabs	Avian coronavirus	AvCoV/chicken/Lao PDR/LAO15_A_11222/2015	AvCoV/chicken/Lao PDR/LAO15_A_11222/2015	duck	Galliformes	Phasianidae	Gallus	Gallus gallus		Coronaviridae	Orthocoronavirinae	Gammacoronavirus	Igacovirus	Gammacoronavirus_Anatiscopes(NL3)	DuCoV_NL3	Gamma_NL3
Public database	MH496877		394	partial, RdRp		2015	Laos	Vientiane	(Sikhottabong and Xaythani Districts	Cloacal swabs , oral/tracheal swabs	Avian coronavirus	AvCoV/chicken/Lao PDR/LAO15_A_11222/2015	AvCoV/chicken/Lao PDR/LAO15_A_11222/2015	duck	Galliformes	Phasianidae	Gallus	Gallus gallus		Coronaviridae	Orthocoronavirinae	Gammacoronavirus	Igacovirus	Gammacoronavirus_Anatiscopes(NL3)	DuCoV_NL3	Gamma_NL3
Public database	MH496878		394	partial, RdRp		2015	Laos	Vientiane	(Sikhottabong and Xaythani Districts	Cloacal swabs , oral/tracheal swabs	Avian coronavirus	AvCoV/chicken/Lao PDR/LAO15_A_11222/2015	AvCoV/chicken/Lao PDR/LAO15_A_11222/2015	duck	Galliformes	Phasianidae	Gallus	Gallus gallus		Coronaviridae	Orthocoronavirinae	Gammacoronavirus	Igacovirus	Gammacoronavirus_Anatiscopes(NL3)	DuCoV_NL3	Gamma_NL3
Public database	MH496879		394	partial, RdRp		2015	Laos	Vientiane	(Sikhottabong and Xaythani Districts	Cloacal swabs , oral/tracheal swabs	Avian coronavirus	AvCoV/chicken/Lao PDR/LAO15_A_11222/2015	AvCoV/chicken/Lao PDR/LAO15_A_11222/2015	duck	Galliformes	Phasianidae	Gallus	Gallus gallus		Coronaviridae	Orthocoronavirinae	Gammacoronavirus	Igacovirus	Gammacoronavirus_Anatiscopes(NL3)	DuCoV_NL3	Gamma_NL3
Public database	MH496880		394	partial, RdRp		2015	Laos	Vientiane	(Sikhottabong and Xaythani Districts	Cloacal swabs , oral/tracheal swabs	Avian coronavirus	AvCoV/chicken/Lao PDR/LAO15_A_11222/2015	AvCoV/chicken/Lao PDR/LAO15_A_11222/2015	duck	Galliformes	Phasianidae	Gallus	Gallus gallus		Coronaviridae	Orthocoronavirinae	Gammacoronavirus	Igacovirus	Gammacoronavirus_Anatiscopes(NL3)	DuCoV_NL3	Gamma_NL3
Public database	MH496881		394	partial, RdRp		2015	Laos	Vientiane	(Sikhottabong and Xaythani Districts	Cloacal swabs , oral/tracheal swabs	Avian coronavirus	AvCoV/chicken/Lao PDR/LAO15_A_11222/2015	AvCoV/chicken/Lao PDR/LAO15_A_11222/2015	duck	Galliformes	Phasianidae	Gallus	Gallus gallus		Coronaviridae	Orthocoronavirinae	Gammacoronavirus	Igacovirus	Gammacoronavirus_Anatiscopes(NL3)	DuCoV_NL3	Gamma_NL3
Public database	MH496882		394	partial, RdRp		2015	Laos	Vientiane	(Sikhottabong and Xaythani Districts	Cloacal swabs , oral/tracheal swabs	Avian coronavirus	AvCoV/chicken/Lao PDR/LAO15_A_11222/2015	AvCoV/chicken/Lao PDR/LAO15_A_11222/2015	duck	Galliformes	Phasianidae	Gallus	Gallus gallus		Coronaviridae	Orthocoronavirinae	Gammacoronavirus	Igacovirus	Gammacoronavirus_Anatiscopes(NL3)	DuCoV_NL3	Gamma_NL3
Public database	MH496883		394	partial, RdRp		2015	Laos	Vientiane	(Sikhottabong and Xaythani Districts	Cloacal swabs , oral/tracheal swabs	Avian coronavirus	AvCoV/chicken/Lao PDR/LAO15_A_11222/2015	AvCoV/chicken/Lao PDR/LAO15_A_11222/2015	duck	Galliformes	Phasianidae	Gallus	Gallus gallus		Coronaviridae	Orthocoronavirinae	Gammacoronavirus	Igacovirus	Gammacoronavirus_Anatiscopes(NL3)	DuCoV_NL3	Gamma_NL3
Public database	MH496884		394	partial, RdRp		2015	Laos	Vientiane	(Sikhottabong and Xaythani Districts	Cloacal swabs , oral/tracheal swabs	Avian coronavirus	AvCoV/chicken/Lao PDR/LAO15_A_11222/2015	AvCoV/chicken/Lao PDR/LAO15_A_11222/2015	duck	Galliformes	Phasianidae	Gallus	Gallus gallus		Coronaviridae	Orthocoronavirinae	Gammacoronavirus	Igacovirus	Gammacoronavirus_Anatiscopes(NL3)	DuCoV_NL3	Gamma_NL3
Public database	MH496885		394	partial, RdRp		2015	Laos	Vientiane	(Sikhottabong and Xaythani Districts	Cloacal swabs , oral/tracheal swabs	Avian coronavirus	AvCoV/chicken/Lao PDR/LAO15_A_11222/2015	AvCoV/chicken/Lao PDR/LAO15_A_11222/2015	duck	Galliformes	Phasianidae	Gallus	Gallus gallus		Coronaviridae	Orthocoronavirinae	Gammacoronavirus	Igacovirus	Gammacoronavirus_Anatiscopes(NL3)	DuCoV_NL3	Gamma_NL3
Public database	MH496886		394	partial, RdRp		2015	Laos	Vientiane	(Sikhottabong and Xaythani Districts	Cloacal swabs , oral/tracheal swabs	Avian coronavirus	AvCoV/chicken/Lao PDR/LAO15_A_11222/2015	AvCoV/chicken/Lao PDR/LAO15_A_11222/2015	duck	Galliformes	Phasianidae	Gallus	Gallus gallus		Coronaviridae	Orthocoronavirinae	Gammacoronavirus	Igacovirus	Gammacoronavirus_Anatiscopes(NL3)	DuCoV_NL3	Gamma_NL3
Public database	MH496887		394	partial, RdRp		2015	Laos	Vientiane	(Sikhottabong and Xaythani Districts	Cloacal swabs , oral/tracheal swabs	Avian coronavirus	AvCoV/chicken/Lao PDR/LAO15_A_11222/2015	AvCoV/chicken/Lao PDR/LAO15_A_11222/2015	duck	Galliformes	Phasianidae	Gallus	Gallus gallus		Coronaviridae	Orthocoronavirinae	Gammacoronavirus	Igacovirus	Gammacoronavirus_Anatiscopes(NL3)	DuCoV_NL3	Gamma_NL3
Public database	MH496888		394	partial, RdRp		2015	Laos	Vientiane	(Sikhottabong and Xaythani Districts	Cloacal swabs , oral/tracheal swabs	Avian coronavirus	AvCoV/chicken/Lao PDR/LAO15_A_11222/2015	AvCoV/chicken/Lao PDR/LAO15_A_11222/2015	duck	Galliformes	Phasianidae	Gallus	Gallus gallus		Coronaviridae	Orthocoronavirinae	Gammacoronavirus	Igacovirus	Gammacoronavirus_Anatiscopes(NL3)	DuCoV_NL3	Gamma_NL3
Public database	MH496889		394	partial, RdRp		2015	Laos	Vientiane	(Sikhottabong and Xaythani Districts	Cloacal swabs , oral/tracheal swabs	Avian coronavirus	AvCoV/chicken/Lao PDR/LAO15_A_11222/2015	AvCoV/chicken/Lao PDR/LAO15_A_11222/2015	duck	Galliformes	Phasianidae	Gallus	Gallus gallus		Coronaviridae	Orthocoronavirinae	Gammacoronavirus	Igacovirus	Gammacoronavirus_Anatiscopes(NL3)	DuCoV_NL3	Gamma_NL3
Public database	MH496890		394	partial, RdRp		2015	Laos	Vientiane	(Sikhottabong and Xaythani Districts	Cloacal swabs , oral/tracheal swabs	Avian coronavirus	AvCoV/chicken/Lao PDR/LAO15_A_11222/2015	AvCoV/chicken/Lao PDR/LAO15_A_11222/2015	duck	Galliformes	Phasianidae	Gallus	Gallus gallus		Coronaviridae	Orthocoronavirinae	Gammacoronavirus	Igacovirus	Gammacoronavirus_Anatiscopes(NL3)	DuCoV_NL3	Gamma_NL3
Public database	MH496891		394	partial, RdRp		2015	Laos	Vientiane	(Sikhottabong and Xaythani Districts	Cloacal swabs , oral/tracheal swabs	Avian coronavirus	AvCoV/chicken/Lao PDR/LAO15_A_11222/2015	AvCoV/chicken/Lao PDR/LAO15_A_11222/2015	duck	Galliformes	Phasianidae	Gallus	Gallus gallus		Coronaviridae	Orthocoronavirinae	Gammacoronavirus	Igacovirus	Gammacoronavirus_Anatiscopes(NL3)	DuCoV_NL3	Gamma_NL3
Public database	MH496892		394	partial, RdRp		2015	Laos	Vientiane	(Sikhottabong and Xaythani Districts	Cloacal swabs , oral/tracheal swabs	Avian coronavirus	AvCoV/chicken/Lao PDR/LAO15_A_11222/2015	AvCoV/chicken/Lao PDR/LAO15_A_11222/2015	duck	Galliformes	Phasianidae	Gallus	Gallus gallus		Coronaviridae	Orthocoronavirinae	Gammacoronavirus	Igacovirus	Gammacoronavirus_Anatiscopes(NL3)	DuCoV_NL3	Gamma_NL3
Public database	MH496893		394	partial, RdRp		2015	Laos	Vientiane	(Sikhottabong and Xaythani Districts	Cloacal swabs , oral/tracheal swabs	Avian coronavirus	AvCoV/chicken/Lao PDR/LAO15_A_11222/2015	AvCoV/chicken/Lao PDR/LAO15_A_11222/2015	duck	Galliformes	Phasianidae	Gallus	Gallus gallus		Coronaviridae	Orthocoronavirinae	Gammacoronavirus	Igacovirus	Gammacoronavirus_Anatiscopes(NL3)	DuCoV_NL3	Gamma_NL3
Public database	MH496894		394	partial, RdRp		2015	Laos	Vientiane	(Sikhottabong and Xaythani Districts	Cloacal swabs , oral/tracheal swabs	Avian coronavirus	AvCoV/chicken/Lao PDR/LAO15_A_11222/2015	AvCoV/chicken/Lao PDR/LAO15_A_11222/2015	duck	Galliformes	Phasianidae	Gallus	Gallus gallus		Coronaviridae	Orthocoronavirinae	Gammacoronavirus	Igacovirus	Gammacoronavirus_Anatiscopes(NL3)	DuCoV_NL3	Gamma_NL3
Public database	MH496895		394	partial, RdRp		2015	Laos	Vientiane	(Sikhottabong and Xaythani Districts	Cloacal swabs , oral/tracheal swabs	Avian coronavirus	AvCoV/chicken/Lao PDR/LAO15_A_11222/2015	AvCoV/chicken/Lao PDR/LAO15_A_11222/2015	duck	Galliformes	Phasianidae	Gallus	Gallus gallus		Coronaviridae	Orthocoronavirinae	Gammacoronavirus	Igacovirus	Gammacoronavirus_Anatiscopes(NL3)	DuCoV_NL3	Gamma_NL3
Public database	MH496896		394	partial, RdRp		2015	Laos	Vientiane	(Sikhottabong and Xaythani Districts	Cloacal swabs , oral/tracheal swabs	Avian coronavirus	AvCoV/chicken/Lao PDR/LAO15_A_11222/2015	AvCoV/chicken/Lao PDR/LAO15_A_11222/2015	duck	Galliformes	Phasianidae	Gallus	Gallus gallus		Coronaviridae	Orthocoronavirinae	Gammacoronavirus	Igacovirus	Gammacoronavirus_Anatiscopes(NL3)	DuCoV_NL3	Gamma_NL3
Public database	MH496897		394	partial, RdRp		2015	Laos	Vientiane	(Sikhottabong and Xaythani Districts	Cloacal swabs , oral/tracheal swabs	Avian coronavirus	AvCoV/chicken/Lao PDR/LAO15_A_11222/2015	AvCoV/chicken/Lao PDR/LAO15_A_11222/2015	duck	Galliformes	Phasianidae	Gallus	Gallus gallus		Coronaviridae	Orthocoronavirinae	Gammacoronavirus	Igacovirus	Gammacoronavirus_Anatiscopes(NL3)	DuCoV_NL3	Gamma_NL3
Public database	MH496898		394	partial, RdRp		2015	Laos	Vientiane	(Sikhottabong and Xaythani Districts	Cloacal swabs , oral/tracheal swabs	Avian coronavirus	AvCoV/chicken/Lao PDR/LAO15_A_11222/2015	AvCoV/chicken/Lao PDR/LAO15_A_11222/2015	duck	Galliformes	Phasianidae	Gallus	Gallus gallus		Coronaviridae	Orthocoronavirinae	Gammacoronavirus	Igacovirus	Gammacoronavirus_Anatiscopes(NL3)	DuCoV_NL3	Gamma_NL3
Public database	MH496899		394	partial, RdRp		2015	Laos	Vientiane	(Sikhottabong and Xaythani Districts	Cloacal swabs , oral/tracheal swabs	Avian coronavirus	AvCoV/chicken/Lao PDR/LAO15_A_11222/2015	AvCoV/chicken/Lao PDR/LAO15_A_11222/2015	duck	Galliformes	Phasianidae	Gallus	Gallus gallus		Coronaviridae	Orthocoronavirinae	Gammacoronavirus	Igacovirus	Gammacoronavirus_Anatiscopes(NL3)	DuCoV_NL3	Gamma_NL3
Public database	MH496900		394	partial, RdRp		2015	Laos	Vientiane	(Sikhottabong and Xaythani Districts	Cloacal swabs , oral/tracheal swabs	Avian coronavirus	AvCoV/chicken/Lao PDR/LAO15_A_11222/2015	AvCoV/chicken/Lao PDR/LAO15_A_11222/2015	duck	Galliformes	Phasianidae	Gallus	Gallus gallus		Coronaviridae	Orthocoronavirinae	Gammacoronavirus	Igacovirus	Gammacoronavirus_Anatiscopes(NL3)	DuCoV_NL3	Gamma_NL3
Public database	MH496901		394	partial, RdRp		2015	Laos	Vientiane	(Sikhottabong and Xaythani Districts	Cloacal swabs , oral/tracheal swabs	Avian coronavirus	AvCoV/chicken/Lao PDR/LAO15_A_11222/2015	AvCoV/chicken/Lao PDR/LAO15_A_11222/2015	duck	Galliformes	Phasianidae	Gallus	Gallus gallus		Coronaviridae	Orthocoronavirinae	Gammacoronavirus	Igacovirus	Gammacoronavirus_Anatiscopes(NL3)	DuCoV_NL3	Gamma_NL3
Public database	MH496902		394	partial, RdRp		2015	Laos	Vientiane	(Sikhottabong and Xaythani Districts	Cloacal swabs , oral/tracheal swabs	Avian coronavirus	AvCoV/chicken/Lao PDR/LAO15_A_11222/2015	AvCoV/chicken/Lao PDR/LAO15_A_11222/2015	duck	Galliformes	Phasianidae	Gallus	Gallus gallus		Coronaviridae	Orthocoronavirinae	Gammacoronavirus	Igacovirus	Gammacoronavirus_Anatiscopes(NL3)	DuCoV_NL3	Gamma_NL3
Public database	MH496903		394	partial, RdRp		2015	Laos	Vientiane	(Sikhottabong and Xaythani Districts	Cloacal swabs , oral/tracheal swabs	Avian coronavirus	AvCoV/chicken/Lao PDR/LAO15_A_11222/2015	AvCoV/chicken/Lao PDR/LAO15_A_11222/2015	duck	Galliformes	Phasianidae	Gallus	Gallus gallus		Coronaviridae	Orthocoronavirinae	Gammacoronavirus	Igacovirus	Gammacoronavirus_Anatiscopes(NL3)	DuCoV_NL3	Gamma_NL3
Public database	MH496904		394	partial, RdRp		2015	Laos	Vientiane	(Sikhottabong and Xaythani Districts	Cloacal swabs , oral/tracheal swabs	Avian coronavirus	AvCoV/chicken/Lao PDR/LAO15_A_11222/2015	AvCoV/chicken/Lao PDR/LAO15_A_11222/2015	duck	Galliformes	Phasianidae	Gallus	Gallus gallus		Coronaviridae	Orthocoronavirinae	Gammacoronavirus	Igacovirus	Gammacoronavirus_Anatiscopes(NL3)	DuCoV_NL3	Gamma_NL3
Public database	MH496905		394	partial, RdRp		2015	Laos	Vientiane	(Sikhottabong and Xaythani Districts	Cloacal swabs , oral/tracheal swabs	Avian coronavirus	AvCoV/chicken/Lao PDR/LAO15_A_11222/2015	AvCoV/chicken/Lao PDR/LAO15_A_11222/2015	chicken	Galliformes	Phasianidae	Gallus	Gallus gallus		Coronaviridae	Orthocoronavirinae	Gammacoronavirus	Igacovirus	Gammacoronavirus_Anatiscopes(NL3)	DuCoV_NL3	Gamma_NL3
Public database	MH496906		394	partial, RdRp		2015	Laos	Vientiane	(Sikhottabong and Xaythani Districts	Cloacal swabs , oral/tracheal swabs	Avian coronavirus	AvCoV/chicken/Lao PDR/LAO15_A_11222/2015	AvCoV/chicken/Lao PDR/LAO15_A_11222/2015	chicken	Galliformes	Phasianidae	Gallus	Gallus gallus		Coronaviridae	Orthocoronavirinae	Gammacoronavirus	Igacovirus	Gammacoronavirus_Anatiscopes(NL3)	DuCoV_NL3	Gamma_NL3
Public database	MH496907		394	partial, RdRp		2015	Laos	Vientiane	(Sikhottabong and Xaythani Districts	Cloacal swabs , oral/tracheal swabs	Avian coronavirus	AvCoV/chicken/Lao PDR/LAO15_A_11222/2015	AvCoV/chicken/Lao PDR/LAO15_A_11222/2015	chicken	Galliformes	Phasianidae	Gallus	Gallus gallus		Coronaviridae	Orthocoronavirinae	Gammacoronavirus	Igacovirus	Gammacoronavirus_Anatiscopes(NL3)	DuCoV_NL3	Gamma_NL3
Public database	MH496908		394	partial, RdRp		2015	Laos	Vientiane	(Sikhottabong and Xaythani Districts	Cloacal swabs , oral/tracheal swabs	Avian coronavirus	AvCoV/chicken/Lao PDR/LAO15_A_11222/2015	AvCoV/chicken/Lao PDR/LAO15_A_11222/2015	chicken	Galliformes	Phasianidae	Gallus	Gallus gallus		Coronaviridae	Orthocoronavirinae	Gammacoronavirus	Igacovirus	Gammacoronavirus_Anatiscopes(NL3)	DuCoV_NL3	Gamma_NL3
Public database	MH496909		394	partial, RdRp		2015	Laos	Vientiane	(Sikhottabong and Xaythani Districts	Cloacal swabs , oral/tracheal swabs	Avian coronavirus	AvCoV/chicken/Lao PDR/LAO15_A_11222/2015	AvCoV/chicken/Lao PDR/LAO15_A_11222/2015	chicken	Galliformes	Phasianidae	Gallus	Gallus gallus		Coronaviridae	Orthocoronavirinae	Gammacoronavirus	Igacovirus	Gammacoronavirus_Anatiscopes(NL3)	DuCoV_NL3	Gamma_NL3
Public database	MH496910		394	partial, RdRp		2015	Laos	Vientiane	(Sikhottabong and Xaythani Districts	Cloacal swabs , oral/tracheal swabs	Avian coronavirus	AvCoV/chicken/Lao PDR/LAO15_A_11222/2015	AvCoV/chicken/Lao PDR/LAO15_A_11222/2015	chicken	Galliformes	Phasianidae	Gallus	Gallus gallus		Coronaviridae	Orthocoronavirinae	Gammacoronavirus	Igacovirus	Gammacoronavirus_Anatiscopes(NL3)	DuCoV_NL3	Gamma_NL3
Public database	MH496911		394	partial, RdRp		2015	Laos	Vientiane	(Sikhottabong and Xaythani Districts	Cloacal swabs , oral/tracheal swabs	Avian coronavirus	AvCoV/chicken/Lao PDR/LAO15_A_11222/2015	AvCoV/chicken/Lao PDR/LAO15_A_11222/2015	chicken	Galliformes	Phasianidae	Gallus	Gallus gallus		Coronaviridae	Orthocoronavirinae	Gammacoronavirus	Igacovirus	Gammacoronavirus_Anatiscopes(NL3)	DuCoV_NL3	Gamma_NL3
Public database	MH496912		394	partial, RdRp		2015	Laos	Vientiane	(Sikhottabong and Xaythani Districts	Cloacal swabs , oral/tracheal swabs	Avian coronavirus	AvCoV/chicken/Lao PDR/LAO15_A_11222/2015	AvCoV/chicken/Lao PDR/LAO15_A_11222/2015	chicken	Galliformes	Phasianidae	Gallus	Gallus gallus		Coronaviridae	Orthocoronavirinae	Gammacoronavirus	Igacovirus	Gammacoronavirus_Anatiscopes(NL3)	DuCoV_NL3	Gamma_NL3
Public database	MH496913		394	partial, RdRp		2015	Laos	Vientiane	(Sikhottabong and Xaythani Districts	Cloacal swabs , oral/tracheal swabs	Avian coronavirus	AvCoV/chicken/Lao PDR/LAO15_A_11222/2015	AvCoV/chicken/Lao PDR/LAO15_A_11222/2015	duck	Galliformes	Phasianidae	Gallus	Gallus gallus		Coronaviridae	Orthocoronavirinae	Gammacoronavirus	Igacovirus	Gammacoronavirus_Anatiscopes(NL3)	DuCoV_NL3	Gamma_NL3
Public database	MH496914		394	partial, RdRp		2015	Laos	Vientiane	(Sikhottabong and Xaythani Districts	Cloacal swabs , oral/tracheal swabs	Avian coronavirus	AvCoV/chicken/Lao PDR/LAO15_A_11222/2015	AvCoV/chicken/Lao PDR/LAO15_A_11222/2015	chicken	Galliformes	Phasianidae	Gallus	Gallus gallus		Coronaviridae	Orthocoronavirinae	Gammacoronavirus	Igacovirus	Gammacoronavirus_Anatiscopes(NL3)	DuCoV_NL3	Gamma_NL3
Public database	MH496915		394	partial, RdRp		2015	Laos	Vientiane	(Sikhottabong and Xaythani Districts	Cloacal swabs , oral/tracheal swabs	Avian coronavirus	AvCoV/chicken/Lao PDR/LAO15_A_11222/2015	AvCoV/chicken/Lao PDR/LAO15_A_11222/2015	chicken	Galliformes	Phasianidae	Gallus	Gallus gallus		Coronaviridae	Orthocoronavirinae	Gammacoronavirus	Igacovirus	Gammacoronavirus_Anatiscopes(NL3)	DuCoV_NL3	Gamma_NL3
Public database	MH496916		394	partial, RdRp		2015	Laos	Vientiane	(Sikhottabong and Xaythani Districts	Cloacal swabs , oral/tracheal swabs	Avian coronavirus	AvCoV/chicken/Lao PDR/LAO15_A_11222/2015	AvCoV/chicken/Lao PDR/LAO15_A_11222/2015	duck	Galliformes	Phasianidae	Gallus	Gallus gallus		Coronaviridae	Orthocoronavirinae	Gammacoronavirus	Igacovirus	Gammacoronavirus_Anatiscopes(NL3)	DuCoV_NL3	Gamma_NL3
Public database	MH496917		394	partial, RdRp		2015	Laos	Vientiane	(Sikhottabong and Xaythani Districts	Cloacal swabs , oral/tracheal swabs	Avian coronavirus	AvCoV/chicken/Lao PDR/LAO15_A_11222/2015	AvCoV/chicken/Lao PDR/LAO15_A_11222/2015	duck	Galliformes	Phasianidae	Gallus	Gallus gallus		Coronaviridae	Orthocoronavirinae	Gammacoronavirus	Igacovirus	Gammacoronavirus_Anatiscopes(NL3)	DuCoV_NL3	Gamma_NL3
Public database	MH496918		394	partial, RdRp		2015	Laos	Vientiane	(Sikhottabong and Xaythani Districts	Cloacal swabs , oral/tracheal swabs	Avian coronavirus	AvCoV/chicken/Lao PDR/LAO15_A_11222/2015	AvCoV/chicken/Lao PDR/LAO15_A_11222/2015	duck	Galliformes	Phasianidae	Gallus	Gallus gallus		Coronaviridae	Orthocoronavirinae	Gammacoronavirus	Igacovirus	Gammacoronavirus_Anatiscopes(NL3)	DuCoV_NL3	Gamma_NL3
Public database	MH496919		394	partial, RdRp		2015	Laos	Vientiane	(Sikhottabong and Xaythani Districts	Cloacal swabs , oral/tracheal swabs	Avian coronavirus	AvCoV/chicken/Lao PDR/LAO15_A_11222/2015	AvCoV/chicken/Lao PDR/LAO15_A_11222/2015	duck	Galliformes	Phasianidae	Gallus	Gallus gallus		Coronaviridae	Orthocoronavirinae	Gammacoronavirus	Igacovirus	Gammacoronavirus_Anatiscopes(NL3)	DuCoV_NL3	Gamma_NL3
Public database	MH496920		394	partial, RdRp		2015	Laos	Vientiane	(Sikhottabong and Xaythani Districts	Cloacal swabs , oral/tracheal swabs	Avian coronavirus	AvCoV/chicken/Lao PDR/LAO15_A_11222/2015	AvCoV/chicken/Lao PDR/LAO15_A_11222/2015	duck	Galliformes	Phasianidae	Gallus	Gallus gallus		Coronaviridae	Orthocoronavirinae	Gammacoronavirus	Igacovirus	Gammacoronavirus_Anatiscopes(NL3)	DuCoV_NL3	Gamma_NL3
Public database	MH496921		394	partial, RdRp		2015	Laos	Vientiane	(Sikhottabong and Xaythani Districts	Cloacal swabs , oral/tracheal swabs	Avian coronavirus	AvCoV/chicken/Lao PDR/LAO15_A_11222/2015	AvCoV/chicken/Lao PDR/LAO15_A_11222/2015	duck	Galliformes	Phasianidae	Gallus	Gallus gallus		Coronaviridae	Orthocoronavirinae	Gammacoronavirus	Igacovirus	Gammacoronavirus_Anatiscopes(NL3)	DuCoV_NL3	Gamma_NL3
Public database	MH496922		394	partial, RdRp		2015	Laos	Vientiane	(Sikhottabong and Xaythani Districts	Cloacal swabs , oral/tracheal swabs	Avian coronavirus	AvCoV/chicken/Lao PDR/LAO15_A_11222/2015	AvCoV/chicken/Lao PDR/LAO15_A_11222/2015	duck	Galliformes	Phasianidae	Gallus	Gallus gallus		Coronaviridae	Orthocoronavirinae	Gammacoronavirus	Igacovirus	Gammacoronavirus_Anatiscopes(NL3)	DuCoV_NL3	Gamma_NL3
Public database	MH496923		394	partial, RdRp		2015	Laos	Vientiane	(Sikhottabong and Xaythani Districts	Cloacal swabs , oral/tracheal swabs	Avian coronavirus	AvCoV/chicken/Lao PDR/LAO15_A_11222/2015	AvCoV/chicken/Lao PDR/LAO15_A_11222/2015	duck	Galliformes	Phasianidae	Gallus	Gallus gallus		Coronaviridae	Orthocoronavirinae	Gammacoronavirus	Igacovirus	Gammacoronavirus_Anatiscopes(NL3)	DuCoV_NL3	Gamma_NL3
Public database	MH496924		394	partial, RdRp		2015	Laos	Vientiane	(Sikhottabong and Xaythani Districts	Cloacal swabs , oral/tracheal swabs	Avian coronavirus	AvCoV/chicken/Lao PDR/LAO15_A_11222/2015	AvCoV/chicken/Lao PDR/LAO15_A_11222/2015	duck	Galliformes	Phasianidae	Gallus	Gallus gallus		Coronaviridae	Orthocoronavirinae	Gammacoronavirus	Igacovirus	Gammacoronavirus_Anatiscopes(NL3)	DuCoV_NL3	Gamma_NL3
Public database	MH496925		394	partial, RdRp		2015	Laos	Vientiane	(Sikhottabong and Xaythani Districts	Cloacal swabs , oral/tracheal swabs	Avian coronavirus	AvCoV/chicken/Lao PDR/LAO15_A_11222/2015	AvCoV/chicken/Lao PDR/LAO15_A_11222/2015	duck	Galliformes	Phasianidae	Gallus	Gallus gallus		Coronaviridae	Orthocoronavirinae	Gammacoronavirus	Igacovirus	Gammacoronavirus_Anatiscopes(NL3)	DuCoV_NL3	Gamma_NL3
Public database	MH496926		394	partial, RdRp		2015	Laos	Vientiane	(Sikhottabong and Xaythani Districts	Cloacal swabs , oral/tracheal swabs	Avian coronavirus	AvCoV/chicken/Lao PDR/LAO15_A_11222/2015	AvCoV/chicken/Lao PDR/LAO15_A_11222/2015	duck	Galliformes	Phasianidae	Gallus	Gallus gallus		Coronaviridae	Orthocoronavirinae	Gammacoronavirus	Igacovirus	Gammacoronavirus_Anatiscopes(NL3)	DuCoV_NL3	Gamma_NL3
Public database	MH496927		394	partial, RdRp		2015	Laos	Vientiane	(Sikhottabong and Xaythani Districts	Cloacal swabs , oral/tracheal swabs	Avian coronavirus	AvCoV/chicken/Lao PDR/LAO15_A_11222/2015	AvCoV/chicken/Lao PDR/LAO15_A_11222/2015	duck	Galliformes	Phasianidae	Gallus	Gallus gallus		Coronaviridae	Orthocoronavirinae	Gammacoronavirus	Igacovirus	Gammacoronavirus_Anatiscopes(NL3)	DuCoV_NL3	Gamma_NL3
Public database	MH496928		394	partial, RdRp		2015	Laos	Vientiane	(Sikhottabong and Xaythani Districts	Cloacal swabs , oral/tracheal swabs	Avian coronavirus	AvCoV/chicken/Lao PDR/LAO15_A_11222/2015	AvCoV/chicken/Lao PDR/LAO15_A_11222/2015	duck	Galliformes	Phasianidae	Gallus	Gallus gallus		Coronaviridae	Orthocoronavirinae	Gammacoronavirus	Igacovirus	Gammacoronavirus_Anatiscopes(NL3)	DuCoV_NL3	Gamma_NL3
Public database	MH496929		394	partial, RdRp		2015	Laos	Vientiane	(Sikhottabong and Xaythani Districts	Cloacal swabs , oral/tracheal swabs	Avian coronavirus	AvCoV/chicken/Lao PDR/LAO15_A_11222/2015	AvCoV/chicken/Lao PDR/LAO15_A_11222/2015	duck	Galliformes	Phasianidae	Gallus	Gallus gallus		Coronaviridae	Orthocoronavirinae	Gammacoronavirus	Igacovirus	Gammacoronavirus_Anatiscopes(NL3)	DuCoV_NL3	Gamma_NL3
Public database	MH496930		394	partial, RdRp		2015	Laos	Vientiane	(Sikhottabong and Xaythani Districts	Cloacal swabs , oral/tracheal swabs	Avian coronavirus	AvCoV/chicken/Lao PDR/LAO15_A_11222/2015	AvCoV/chicken/Lao PDR/LAO15_A_11222/2015	duck	Galliformes	Phasianidae	Gallus	Gallus gallus		Coronaviridae	Orthocoronavirinae	Gammacoronavirus	Igacovirus	Gammacoronavirus_Anatiscopes(NL3)	DuCoV_NL3	Gamma_NL3
Public database	MH496931		394	partial, RdRp		2015	Laos	Vientiane	(Sikhottabong and Xaythani Districts	Cloacal swabs , oral/tracheal swabs	Avian coronavirus	AvCoV/chicken/Lao PDR/LAO15_A_11222/2015	AvCoV/chicken/Lao PDR/LAO15_A_11222/2015	duck	Galliformes	Phasianidae	Gallus	Gallus gallus		Coronaviridae	Orthocoronavirinae	Gammacoronavirus	Igacovirus	Gammacoronavirus_Anatiscopes(NL3)	DuCoV_NL3	Gamma_NL3
Public database	MH496932		394	partial, RdRp		2015	Laos	Vientiane	(Sikhottabong and Xaythani Districts	Cloacal swabs , oral/tracheal swabs	Avian coronavirus	AvCoV/chicken/Lao PDR/LAO15_A_11222/2015	AvCoV/chicken/Lao PDR/LAO15_A_11222/2015	duck	Galliformes	Phasianidae	Gallus	Gallus gallus		Coronaviridae	Orthocoronavirinae	Gammacoronavirus	Igacovirus	Gammacoronavirus_Anatiscopes(NL3)	DuCoV_NL3	Gamma_NL3
Public database	MH496933		394	partial, RdRp		2015	Laos	Vientiane	(Sikhottabong and Xaythani Districts	Cloacal swabs , oral/tracheal swabs	Avian coronavirus	AvCoV/chicken/Lao PDR/LAO15_A_11222/2015	AvCoV/chicken/Lao PDR/LAO15_A_11222/2015	duck	Galliformes	Phasianidae	Gallus	Gallus gallus		Coronaviridae	Orthocoronavirinae	Gammacoronavirus	Igacovirus	Gammacoronavirus_Anatiscopes(NL3)	DuCoV_NL3	Gamma_NL3
Public database	MH496934		394	partial, RdRp		2015	Laos	Vientiane	(Sikhottabong and Xaythani Districts	Cloacal swabs , oral/tracheal swabs	Avian coronavirus	AvCoV/chicken/Lao PDR/LAO15_A_11222/2015	AvCoV/chicken/Lao PDR/LAO15_A_11222/2015	duck	Galliformes	Phasianidae	Gallus	Gallus gallus		Coronaviridae	Orthocoronavirinae	Gammacoronavirus	Igacovirus	Gammacoronavirus_Anatiscopes(NL3)	DuCoV_NL3	Gamma_NL3
Public database	MH496935		394	partial, RdRp		2015	Laos	Vientiane	(Sikhottabong and Xaythani Districts	Cloacal swabs , oral/tracheal swabs	Avian coronavirus	AvCoV/chicken/Lao PDR/LAO15_A_11222/2015	AvCoV/chicken/Lao PDR/LAO15_A_11222/2015	duck	Galliformes	Phasianidae	Gallus	Gallus gallus		Coronaviridae	Orthocoronavirinae	Gammacoronavirus	Igacovirus	Gammacoronavirus_Anatiscopes(NL3)	DuCoV_NL3	Gamma_NL3
Public database	MH496936		394	partial, RdRp		2015	Laos	Vientiane	(Sikhottabong and Xaythani Districts	Cloacal swabs , oral/tracheal swabs	Avian coronavirus	AvCoV/chicken/Lao PDR/LAO15_A_11222/2015	AvCoV/chicken/Lao PDR/LAO15_A_11222/2015	duck	Galliformes	Phasianidae	Gallus	Gallus gallus		Coronaviridae	Orthocoronavirinae	Gammacoronavirus	Igacovirus	Gammacoronavirus_Anatiscopes(NL3)	DuCoV_NL3	Gamma_NL3
Public database	MH496937		394	partial, RdRp		2015	Laos	Vientiane	(Sikhottabong and Xaythani Districts	Cloacal swabs , oral/tracheal swabs	Avian coronavirus	AvCoV/chicken/Lao PDR/LAO15_A_11222/2015	AvCoV/chicken/Lao PDR/LAO15_A_11222/2015	duck	Galliformes	Phasianidae	Gallus	Gallus gallus		Coronaviridae	Orthocoronavirinae	Gammacoronavirus	Igacovirus	Gammacoronavirus_Anatiscopes(NL3)	DuCoV_NL3	Gamma_NL3
Public database	MH496938		394	partial, RdRp		2015	Laos	Vientiane	(Sikhottabong and Xaythani Districts	Cloacal swabs , oral/tracheal swabs	Avian coronavirus	AvCoV/chicken/Lao PDR/LAO15_A_11222/2015	AvCoV/chicken/Lao PDR/LAO15_A_11222/2015	duck	Galliformes	Phasianidae	Gallus	Gallus gallus		Coronaviridae	Orthocoronavirinae	Gammacoronavirus	Igacovirus	Gammacoronavirus_Anatiscopes(NL3)	DuCoV_NL3	Gamma_NL3
Public database	MH496939		394	partial, RdRp		2015	Laos	Vientiane	(Sikhottabong and Xaythani Districts	Cloacal swabs , oral/tracheal swabs	Avian coronavirus	AvCoV/chicken/Lao PDR/LAO15_A_11222/2015	AvCoV/chicken/Lao PDR/LAO15_A_11222/2015	duck	Galliformes	Phasianidae	Gallus	Gallus gallus		Coronaviridae	Orthocoronavirinae	Gammacoronavirus	Igacovirus	Gammacoronavirus_Anatiscopes(NL3)	DuCoV_NL3	Gamma_NL3
Public database	MH496940		394	partial, RdRp		2015	Laos	Vientiane	(Sikhottabong and Xaythani Districts	Cloacal swabs , oral/tracheal swabs	Avian coronavirus	AvCoV/chicken/Lao PDR/LAO15_A_11222/2015	AvCoV/chicken/Lao PDR/LAO15_A_11222/2015	duck	Galliformes	Phasianidae	Gallus	Gallus gallus		Coronaviridae	Orthocoronavirinae	Gammacoronavirus	Igacovirus	Gammacoronavirus_Anatiscopes(NL3)	DuCoV_NL3	Gamma_NL3
Public database	MH496941		394	partial, RdRp		2015	Laos	Vientiane	(Sikhottabong and Xaythani Districts	Cloacal swabs , oral/tracheal swabs	Avian coronavirus	AvCoV/chicken/Lao PDR/LAO15_A_11222/2015	AvCoV/chicken/Lao PDR/LAO15_A_11222/2015	duck	Galliformes	Phasianidae	Gallus	Gallus gallus		Coronaviridae	Orthocoronavirinae	Gammacoronavirus	Igacovirus	Gammacoronavirus_Anatiscopes(NL3)	DuCoV_NL3	Gamma_NL3
Public database	MH496942		394	partial, RdRp		2015	Laos	Vientiane	(Sikhottabong and Xaythani Districts	Cloacal swabs , oral/tracheal swabs	Avian coronavirus	AvCoV/chicken/Lao PDR/LAO15_A_11222/2015	AvCoV/chicken/Lao PDR/LAO15_A_11222/2015	duck	Galliformes	Phasianidae	Gallus	Gallus gallus		Coronaviridae	Orthocoronavirinae	Gammacoronavirus	Igacovirus	Gammacoronavirus_Anatiscopes(NL3)	DuCoV_NL3	Gamma_NL3
Public database	MH496943		394	partial, RdRp		2015	Laos	Vientiane	(Sikhottabong and Xaythani Districts	Cloacal swabs , oral/tracheal swabs	Avian coronavirus	AvCoV/chicken/Lao PDR/LAO15_A_11222/2015	AvCoV/chicken/Lao PDR/LAO15_A_11222/2015	duck	Galliformes	Phasianidae	Gallus	Gallus gallus		Coronaviridae	Orthocoronavirinae	Gammacoronavirus	Igacovirus	Gammacoronavirus_Anatiscopes(NL3)	DuCoV_NL3	Gamma_NL3
Public database	MH496944		394	partial, RdRp		2015	Laos	Vientiane	(Sikhottabong and Xaythani Districts	Cloacal swabs , oral/tracheal swabs	Avian coronavirus	AvCoV/chicken/Lao PDR/LAO15_A_11222/2015	AvCoV/chicken/Lao PDR/LAO15_A_11222/2015	duck	Galliformes	Phasianidae	Gallus	Gallus gallus		Coronaviridae	Orthocoronavirinae	Gammacoronavirus	Igacovirus	Gammacoronavirus_Anatiscopes(NL3)	DuCoV_NL3	Gamma_NL3
Public database	MH496945		394	partial, RdRp		2015	Laos	Vientiane	(Sikhottabong and Xaythani Districts	Cloacal swabs , oral/tracheal swabs	Avian coronavirus	AvCoV/chicken/Lao PDR/LAO15_A_11222/2015	AvCoV/chicken/Lao PDR/LAO15_A_11222/2015	duck	Galliformes	Phasianidae	Gallus	Gallus gallus		Coronaviridae	Orthocoronavirinae	Gammacoronavirus	Igacovirus	Gammacoronavirus_Anatiscopes(NL3)	DuCoV_NL3	Gamma_NL3
Public database	KT882625		354	partial, RdRp		2007	Sweden	Ottenby		fecal swab	Avian coronavirus	AvCoV/Anas platyrhynchos/70043/2007	AvCoV/Anas platyrhynchos/70043/2007	Anas platyrhynchos	Anseriformes	Anatidae	Anas	Anas platyrhynchos	yes	Coronaviridae	Orthocoronavirinae	Gammacoronavirus	Igacovirus	Gammacoronavirus_Anatiscopes(NL3)	DuCoV_NL3	Gamma_NL3
Public database	KT882627		354	partial, RdRp		2007	Sweden	Ottenby		fecal swab	Avian coronavirus	AvCoV/Anas platyrhynchos/70119/2007	AvCoV/Anas platyrhynchos/70119/2007	Anas platyrhynchos	Anseriformes	Anatidae	Anas	Anas platyrhynchos	yes	Coronaviridae	Orthocoronavirinae	Gammacoronavirus	Igacovirus	Gammacoronavirus_Anatiscopes(NL3)	DuCoV_NL3	Gamma_NL3
Public database	KT882620		354	partial, RdRp		2007	Sweden	Ottenby		fecal swab	Avian coronavirus	AvCoV/Anas platyrhynchos/69974/2007	AvCoV/Anas platyrhynchos/69974/2007	Anas platyrhynchos	Anseriformes	Anatidae	Anas	Anas platyrhynchos	yes	Coronaviridae	Orthocoronavirinae	Gammacoronavirus	Igacovirus	Gammacoronavirus_Anatiscopes(NL3)	DuCoV_NL3	Gamma_NL3
Public database	JN788792		360	partial, RdRp		2009-11-27	China	Hong Kong	Mai Po Marshes	Cloacal swabs	Avian coronavirus	J0579/Anas crecca/091127	J0579/Anas crecca/091127	Anas crecca	Anseriformes	Anatidae	Anas	Anas crecca	yes	Coronaviridae	Orthocoronavirinae	Gammacoronavirus	Igacovirus	Gammacoronavirus_Anatiscopes(NL3)	DuCoV_NL3	Gamma_NL3
Public database	JN788871		360	partial, RdRp		2009-12-23	China	Hong Kong	Mai Po Marshes	Cloacal swabs	Avian coronavirus	K561/Anas clypeata/091223	K561/Anas clypeata/091223	Anas clypeata	Anseriformes	Anatidae	Anas	Anas clypeata		Coronaviridae	Orthocoronavirinae	Gammacoronavirus	Igacovirus	Gammacoronavirus_Anatiscopes(NL3)	DuCoV_NL3	Gamma_NL3
Public database	JN788786		360	partial, RdRp		2009-11-27	China	Hong Kong	Mai Po Marshes	Cloacal swabs	Avian coronavirus	J0559/Anas crecca/091127	J0559/Anas crecca/091127	Anas crecca	Anseriformes	Anatidae	Anas	Anas crecca	yes	Coronaviridae	Orthocoronavirinae	Gammacoronavirus	Igacovirus	Gammacoronavirus_Anatiscopes(NL3)	DuCoV_NL3	Gamma_NL3
Public database	KX588657		464	partial, RdRp		2013-08-14	Finland			cloacal swab, tracheal swab, oropharyngeal swab, or tissue	Avian coronavirus	AvCoV/Anas_platyrhynchos/Finland/8597/2010		Anas platyrhynchos	Charadriiformes	Laridae	Chroicocephalus	Chroicocephalus ridibundus		Coronaviridae	Orthocoronavirinae	Gammacoronavirus	Igacovirus	Gammacoronavirus_Anatiscopes(NL3)	DuCoV_NL3	Gamma_NL3
Public database	KT882623		354	partial, RdRp		2007	Sweden	Ottenby		fecal swab	Avian coronavirus	AvCoV/Anas platyrhynchos/69998/2007	AvCoV/Anas platyrhynchos/69998/2007	Anas platyrhynchos	Anseriformes	Anatidae	Anas	Anas platyrhynchos	yes	Coronaviridae	Orthocoronavirinae	Gammacoronavirus	Igacovirus	Gammacoronavirus_Anatiscopes(NL3)	DuCoV_NL3	Gamma_NL3
Public database	KX588666		463	partial, RdRp		2013-08-14	Finland			cloacal swab, tracheal swab, oropharyngeal swab, or tissue	Avian coronavirus	AvCoV/Anas_crecca/Finland/9203/2010		Anas crecca	Charadriiformes	Laridae	Chroicocephalus	Chroicocephalus ridibundus		Coronaviridae	Orthocoronavirinae	Gammacoronavirus	Igacovirus	Gammacoronavirus_Anatiscopes(NL3)	DuCoV_NL3	Gamma_NL3
Public database	KX588670		463	partial, RdRp		2013-08-14	Finland			cloacal swab, tracheal swab, oropharyngeal swab, or tissue	Avian coronavirus	AvCoV/Anas_crecca/Finland/9362/2010		Anas crecca	Charadriiformes	Laridae	Chroicocephalus	Chroicocephalus ridibundus		Coronaviridae	Orthocoronavirinae	Gammacoronavirus	Igacovirus	Gammacoronavirus_Anatiscopes(NL3)	DuCoV_NL3	Gamma_NL3
Public database	MK617427		472	partial, RdRp		2010-03-17	Poland			Cloacal/fecal swab	Avian coronavirus	GammaCoV/AvCoV/Mallard_duck/Poland/MW54/2010	GammaCoV/AvCoV/Mallard_duck/Poland/MW54/2010	mallard duck	Anseriformes	Anatidae	Anas	Anas platyrhynchos	yes	Coronaviridae	Orthocoronavirinae	Gammacoronavirus	Igacovirus	Gammacoronavirus_Anatiscopes(NL3)	DuCoV_NL3	Gamma_NL3
Public database	KX588648		464	partial, RdRp		2013-08-14	Finland			cloacal swab, tracheal swab, oropharyngeal swab, or tissue	Avian coronavirus	AvCoV/Anas_platyrhynchos/Finland/13389/2010		Anas platyrhynchos	Charadriiformes	Laridae	Chroicocephalus	Chroicocephalus ridibundus		Coronaviridae	Orthocoronavirinae	Gammacoronavirus	Igacovirus	Gammacoronavirus_Anatiscopes(NL3)	DuCoV_NL3	Gamma_NL3
Public database	KX588658		464	partial, RdRp		2013-08-14	Finland			cloacal swab, tracheal swab, oropharyngeal swab, or tissue	Avian coronavirus	AvCoV/Anas_platyrhynchos/Finland/8627/2010		Anas platyrhynchos	Charadriiformes	Laridae	Chroicocephalus	Chroicocephalus ridibundus		Coronaviridae	Orthocoronavirinae	Gammacoronavirus	Igacovirus	Gammacoronavirus_Anatiscopes(NL3)	DuCoV_NL3	Gamma_NL3
Public database	MK617424		472	partial, RdRp		2009-10-07	Poland			Cloacal/fecal swab	Avian coronavirus	GammaCoV/AvCoV/Mallard_duck/Poland/MW298A/2009	GammaCoV/AvCoV/Mallard_duck/Poland/MW298A/2009	mallard duck	Anseriformes	Anatidae	Anas	Anas platyrhynchos	yes	Coronaviridae	Orthocoronavirinae	Gammacoronavirus	Igacovirus	Gammacoronavirus_Anatiscopes(NL3)	DuCoV_NL3	Gamma_NL3
Public database	MK617389		472	partial, RdRp		2012-08-29	Poland			Cloacal/fecal swab	Avian coronavirus	GammaCoV/AvCoV/Common_teal/Poland/Mor77/2/2012	GammaCoV/AvCoV/Common_teal/Poland/Mor77/2/2012	common teal	Anseriformes	Anatidae	Anas	Anas crecca	yes	Coronaviridae	Orthocoronavirinae	Gammacoronavirus	Igacovirus	Gammacoronavirus_Anatiscopes(NL3)	DuCoV_NL3	Gamma_NL3
Public database	MK617426		472	partial, RdRp		2009-09-23	Poland			Cloacal/fecal swab	Avian coronavirus	GammaCoV/AvCoV/Mallard_duck/Poland/MW343/2009	GammaCoV/AvCoV/Mallard_duck/Poland/MW343/2009	mallard duck	Anseriformes	Anatidae	Anas	Anas platyrhynchos	yes	Coronaviridae	Orthocoronavirinae	Gammacoronavirus	Igacovirus	Gammacoronavirus_Anatiscopes(NL3)	DuCoV_NL3	Gamma_NL3
Public database	MK617491		472	partial, RdRp		2017-08-09	Poland			Cloacal/fecal swab	Avian coronavirus	GammaCoV/AvCoV/Mute_swan/Poland/P207/1/2017	GammaCoV/AvCoV/Mute_swan/Poland/P207/1/2017	mute swan	Anseriformes	Anatidae	Cygnus	Cygnus olor	yes	Coronaviridae	Orthocoronavirinae	Gammacoronavirus	Igacovirus	Gammacoronavirus_Anatiscopes(NL3)	DuCoV_NL3	Gamma_NL3
Public database	MK617474		472	partial, RdRp		2013-10-20	Poland			Cloacal/fecal swab	Avian coronavirus	GammaCoV/AvCoV/Mute_swan/Poland/Mor93/4/2013	GammaCoV/AvCoV/Mute_swan/Poland/Mor93/4/2013	mute swan	Anseriformes	Anatidae	Cygnus	Cygnus olor	yes	Coronaviridae	Orthocoronavirinae	Gammacoronavirus	Igacovirus	Gammacoronavirus_Anatiscopes(NL3)	DuCoV_NL3	Gamma_NL3
Public database	KT882624		352	partial, RdRp		2007	Sweden	Ottenby		fecal swab	Avian coronavirus	AvCoV/Anas platyrhynchos/70034/2007	AvCoV/Anas platyrhynchos/70034/2007	Anas platyrhynchos	Anseriformes	Anatidae	Anas	Anas platyrhynchos	yes	Coronaviridae	Orthocoronavirinae	Gammacoronavirus	Igacovirus	Gammacoronavirus_Anatiscopes(NL3)	DuCoV_NL3	Gamma_NL3
Public database	KT882621		354	partial, RdRp		2007	Sweden	Ottenby		fecal swab	Avian coronavirus	AvCoV/Anas platyrhynchos/69976/2007	AvCoV/Anas platyrhynchos/69976/2007	Anas platyrhynchos	Anseriformes	Anatidae	Anas	Anas platyrhynchos	yes	Coronaviridae	Orthocoronavirinae	Gammacoronavirus	Igacovirus	Gammacoronavirus_Anatiscopes(NL3)	DuCoV_NL3	Gamma_NL3
Public database	MK617457		472	partial, RdRp		2014-09-26	Poland			Cloacal/fecal swab	Avian coronavirus	GammaCoV/AvCoV/Mallard_duck/Poland/P115/1/2014	GammaCoV/AvCoV/Mallard_duck/Poland/P115/1/2014	mallard duck	Anseriformes	Anatidae	Anas	Anas platyrhynchos	yes	Coronaviridae	Orthocoronavirinae	Gammacoronavirus	Igacovirus	Gammacoronavirus_Anatiscopes(NL3)	DuCoV_NL3	Gamma_NL3
Public database	MK617429		472	partial, RdRp		2015-01-02	Poland			Cloacal/fecal swab	Avian coronavirus	GammaCoV/AvCoV/Mallard_duck/Poland/P003/14/2015	GammaCoV/AvCoV/Mallard_duck/Poland/P003/14/2015	mallard duck	Anseriformes	Anatidae	Anas	Anas platyrhynchos	yes	Coronaviridae	Orthocoronavirinae	Gammacoronavirus	Igacovirus	Gammacoronavirus_Anatiscopes(NL3)	DuCoV_NL3	Gamma_NL3
Public database	MK617432		472	partial, RdRp		2015-01-13	Poland			Cloacal/fecal swab	Avian coronavirus	GammaCoV/AvCoV/Mallard_duck/Poland/P012/11/2015	GammaCoV/AvCoV/Mallard_duck/Poland/P012/11/2015	mallard duck	Anseriformes	Anatidae	Anas	Anas platyrhynchos	yes	Coronaviridae	Orthocoronavirinae	Gammacoronavirus	Igacovirus	Gammacoronavirus_Anatiscopes(NL3)	DuCoV_NL3	Gamma_NL3
Public database	MK617458		461	partial, RdRp		2015-09-26	Poland			Cloacal/fecal swab	Avian coronavirus	GammaCoV/AvCoV/Mallard_duck/Poland/P115/1/2015	GammaCoV/AvCoV/Mallard_duck/Poland/P115/1/2015	mallard duck	Anseriformes	Anatidae	Anas	Anas platyrhynchos	yes	Coronaviridae	Orthocoronavirinae	Gammacoronavirus	Igacovirus	Gammacoronavirus_Anatiscopes(NL3)	DuCoV_NL3	Gamma_NL3
Public database	MK617423		472	partial, RdRp		2009-10-07	Poland			Cloacal/fecal swab	Avian coronavirus	GammaCoV/AvCoV/Mallard_duck/Poland/MW296B/2009	GammaCoV/AvCoV/Mallard_duck/Poland/MW296B/2009	mallard duck	Anseriformes	Anatidae	Anas	Anas platyrhynchos	yes	Coronaviridae	Orthocoronavirinae	Gammacoronavirus	Igacovirus	Gammacoronavirus_Anatiscopes(NL3)	DuCoV_NL3	Gamma_NL3
Public database	MK617477		472	partial, RdRp		2009-10-07	Poland			Cloacal/fecal swab	Avian coronavirus	GammaCoV/AvCoV/Mute_swan/Poland/MW296A/2009	GammaCoV/AvCoV/Mute_swan/Poland/MW296A/2009	mute swan	Anseriformes	Anatidae	Cygnus	Cygnus olor	yes	Coronaviridae	Orthocoronavirinae	Gammacoronavirus	Igacovirus	Gammacoronavirus_Anatiscopes(NL3)	DuCoV_NL3	Gamma_NL3
Public database	JN788808		360	partial, RdRp		2009-12-17	China	Hong Kong	Mai Po Marshes	Cloacal swabs	Avian coronavirus	J10127/091217	J10127/091217		Anseriformes	Anatidae	Anas	Anas clypeata		Coronaviridae	Orthocoronavirinae	Gammacoronavirus	Igacovirus	Gammacoronavirus_Anatiscopes(NL3)	DuCoV_NL3	Gamma_NL3
Public database	JN788869		360	partial, RdRp		2009-12-23	China	Hong Kong	Mai Po Marshes	Cloacal swabs	Avian coronavirus	K554/Anas clypeata/091223	K554/Anas clypeata/091223	Anas clypeata	Anseriformes	Anatidae	Anas	Anas clypeata		Coronaviridae	Orthocoronavirinae	Gammacoronavirus	Igacovirus	Gammacoronavirus_Anatiscopes(NL3)	DuCoV_NL3	Gamma_NL3
Public database	KT882628		522	partial, RdRp		2007	Sweden	Ottenby		fecal swab	Avian coronavirus	AvCoV/Anas platyrhynchos/70125/2007	AvCoV/Anas platyrhynchos/70125/2007	Anas platyrhynchos	Anseriformes	Anatidae	Anas	Anas platyrhynchos	yes	Coronaviridae	Orthocoronavirinae	Gammacoronavirus	Igacovirus	Gammacoronavirus_Anatiscopes(NL3)	DuCoV_NL3	Gamma_NL3
Public database	MK617421		472	partial, RdRp		2013-10-06	Poland			Cloacal/fecal swab	Avian coronavirus	GammaCoV/AvCoV/Mallard_duck/Poland/Mor89/6/2013	GammaCoV/AvCoV/Mallard_duck/Poland/Mor89/6/2013	mallard duck	Anseriformes	Anatidae	Anas	Anas platyrhynchos	yes	Coronaviridae	Orthocoronavirinae	Gammacoronavirus	Igacovirus	Gammacoronavirus_Anatiscopes(NL3)	DuCoV_NL3	Gamma_NL3
Public database	OQ731817		367	partial, RdRp		2021-09-11	Russia	Sakhalin region, Okhinsky city district			Avian coronavirus	AvCoV/Common teal/Sakhalin/198m/2021	AvCoV/Common teal/Sakhalin/198m/2021	Anas crecca	Anseriformes	Anatidae	Anas	Anas crecca	yes	Coronaviridae	Orthocoronavirinae	Gammacoronavirus	Igacovirus	Gammacoronavirus_Anatiscopes(NL3)	DuCoV_NL3	Gamma_NL3
Public database	KT882616		522	partial, RdRp		2007	Sweden	Ottenby		fecal swab	Avian coronavirus	AvCoV/Aythya marila/67699/2007	AvCoV/Aythya marila/67699/2007	Aythya marila	Anseriformes	Anatidae	Aythya	Aythya marila	yes	Coronaviridae	Orthocoronavirinae	Gammacoronavirus	Igacovirus	Gammacoronavirus_Anatiscopes(NL3)	DuCoV_NL3	Gamma_NL3
Public database	MK617395		472	partial, RdRp		2016-08-30	Poland			Cloacal/fecal swab	Avian coronavirus	GammaCoV/AvCoV/Common_teal/Poland/P069/1/2016	GammaCoV/AvCoV/Common_teal/Poland/P069/1/2016	common teal	Anseriformes	Anatidae	Anas	Anas crecca	yes	Coronaviridae	Orthocoronavirinae	Gammacoronavirus	Igacovirus	Gammacoronavirus_Anatiscopes(NL3)	DuCoV_NL3	Gamma_NL3
Public database	MK617398		472	partial, RdRp		2013-09-06	Poland			Cloacal/fecal swab	Avian coronavirus	GammaCoV/AvCoV/Common_teal/Poland/P069/10/2016	GammaCoV/AvCoV/Common_teal/Poland/P069/10/2016	common teal	Anseriformes	Anatidae	Anas	Anas crecca	yes	Coronaviridae	Orthocoronavirinae	Gammacoronavirus	Igacovirus	Gammacoronavirus_Anatiscopes(NL3)	DuCoV_NL3	Gamma_NL3
Public database	MK617431		472	partial, RdRp		2015-01-13	Poland			Cloacal/fecal swab	Avian coronavirus	GammaCoV/AvCoV/Mallard_duck/Poland/P012/10/2015	GammaCoV/AvCoV/Mallard_duck/Poland/P012/10/2015	mallard duck	Anseriformes	Anatidae	Anas	Anas platyrhynchos	yes	Coronaviridae	Orthocoronavirinae	Gammacoronavirus	Igacovirus	Gammacoronavirus_Anatiscopes(NL3)	DuCoV_NL3	Gamma_NL3
Public database	MK617401		472	partial, RdRp		2011-04-15	Poland			Cloacal/fecal swab	Avian coronavirus	GammaCoV/AvCoV/Greylag_goose/Poland/MW104A/2011	GammaCoV/AvCoV/Greylag_goose/Poland/MW104A/2011	greylag goose	Anseriformes	Anatidae	Anser	Anser anser	yes	Coronaviridae	Orthocoronavirinae	Gammacoronavirus	Igacovirus	Gammacoronavirus_Anatiscopes(NL3)	DuCoV_NL3	Gamma_NL3
Public database	MK617388		472	partial, RdRp		2012-08-20	Poland			Cloacal/fecal swab	Avian coronavirus	GammaCoV/AvCoV/Common_teal/Poland/Mor75/6/2012	GammaCoV/AvCoV/Common_teal/Poland/Mor75/6/2012	common teal	Anseriformes	Anatidae	Anas	Anas crecca	yes	Coronaviridae	Orthocoronavirinae	Gammacoronavirus	Igacovirus	Gammacoronavirus_Anatiscopes(NL3)	DuCoV_NL3	Gamma_NL3
Public database	MK617392		472	partial, RdRp		2013-08-26	Poland			Cloacal/fecal swab	Avian coronavirus	GammaCoV/AvCoV/Common_teal/Poland/Mor78/18/2013	GammaCoV/AvCoV/Common_teal/Poland/Mor78/18/2013	common teal	Anseriformes	Anatidae	Anas	Anas crecca	yes	Coronaviridae	Orthocoronavirinae	Gammacoronavirus	Igacovirus	Gammacoronavirus_Anatiscopes(NL3)	DuCoV_NL3	Gamma_NL3
Public database	MK617394		472	partial, RdRp		2013-08-26	Poland			Cloacal/fecal swab	Avian coronavirus	GammaCoV/AvCoV/Common_teal/Poland/Mor78/22/2013	GammaCoV/AvCoV/Common_teal/Poland/Mor78/22/2013	common teal	Anseriformes	Anatidae	Anas	Anas crecca	yes	Coronaviridae	Orthocoronavirinae	Gammacoronavirus	Igacovirus	Gammacoronavirus_Anatiscopes(NL3)	DuCoV_NL3	Gamma_NL3
Public database	MK617399		472	partial, RdRp		2016-09-06	Poland			Cloacal/fecal swab	Avian coronavirus	GammaCoV/AvCoV/Common_teal/Poland/P069/11/2016	GammaCoV/AvCoV/Common_teal/Poland/P069/11/2016	common teal	Anseriformes	Anatidae	Anas	Anas crecca	yes	Coronaviridae	Orthocoronavirinae	Gammacoronavirus	Igacovirus	Gammacoronavirus_Anatiscopes(NL3)	DuCoV_NL3	Gamma_NL3
Public database	MK617462		472	partial, RdRp		2017-11-26	Poland			Cloacal/fecal swab	Avian coronavirus	GammaCoV/AvCoV/Mallard_duck/Poland/P345/5/2017	GammaCoV/AvCoV/Mallard_duck/Poland/P345/5/2017	mallard duck	Anseriformes	Anatidae	Anas	Anas platyrhynchos	yes	Coronaviridae	Orthocoronavirinae	Gammacoronavirus	Igacovirus	Gammacoronavirus_Anatiscopes(NL3)	DuCoV_NL3	Gamma_NL3
Public database	MK617386		472	partial, RdRp		2011-03-23	Poland			Cloacal/fecal swab	Avian coronavirus	GammaCoV/AvCoV/Common_gull/Poland/MW60/2011	GammaCoV/AvCoV/Common_gull/Poland/MW60/2011	common gull	Charadriiformes	Laridae	Larus	Larus canus	yes	Coronaviridae	Orthocoronavirinae	Gammacoronavirus	Igacovirus	Gammacoronavirus_Anatiscopes(NL3)	DuCoV_NL3	Gamma_NL3
Public database	MK617486		472	partial, RdRp		2015-08-12	Poland			Cloacal/fecal swab	Avian coronavirus	GammaCoV/AvCoV/Mute_swan/Poland/P087/14/2015	GammaCoV/AvCoV/Mute_swan/Poland/P087/14/2015	mute swan	Anseriformes	Anatidae	Cygnus	Cygnus olor	yes	Coronaviridae	Orthocoronavirinae	Gammacoronavirus	Igacovirus	Gammacoronavirus_Anatiscopes(NL3)	DuCoV_NL3	Gamma_NL3
Public database	MK617487		472	partial, RdRp		2015-08-12	Poland			Cloacal/fecal swab	Avian coronavirus	GammaCoV/AvCoV/Mute_swan/Poland/P087/6/2015	GammaCoV/AvCoV/Mute_swan/Poland/P087/6/2015	mute swan	Anseriformes	Anatidae	Cygnus	Cygnus olor	yes	Coronaviridae	Orthocoronavirinae	Gammacoronavirus	Igacovirus	Gammacoronavirus_Anatiscopes(NL3)	DuCoV_NL3	Gamma_NL3
Public database	MK617488		472	partial, RdRp		2015-08-12	Poland			Cloacal/fecal swab	Avian coronavirus	GammaCoV/AvCoV/Mute_swan/Poland/P087/8/2015	GammaCoV/AvCoV/Mute_swan/Poland/P087/8/2015	mute swan	Anseriformes	Anatidae	Cygnus	Cygnus olor	yes	Coronaviridae	Orthocoronavirinae	Gammacoronavirus	Igacovirus	Gammacoronavirus_Anatiscopes(NL3)	DuCoV_NL3	Gamma_NL3
Public database	MK617490		472	partial, RdRp		2014-03-21	Poland			Cloacal/fecal swab	Avian coronavirus	GammaCoV/AvCoV/Mute_swan/Poland/P119/1/2014	GammaCoV/AvCoV/Mute_swan/Poland/P119/1/2014	mute swan	Anseriformes	Anatidae	Cygnus	Cygnus olor	yes	Coronaviridae	Orthocoronavirinae	Gammacoronavirus	Igacovirus	Gammacoronavirus_Anatiscopes(NL3)	DuCoV_NL3	Gamma_NL3
Public database	MK617443		472	partial, RdRp		2015-06-20	Poland			Cloacal/fecal swab	Avian coronavirus	GammaCoV/AvCoV/Mallard_duck/Poland/P076/1/2015	GammaCoV/AvCoV/Mallard_duck/Poland/P076/1/2015	mallard duck	Anseriformes	Anatidae	Anas	Anas platyrhynchos	yes	Coronaviridae	Orthocoronavirinae	Gammacoronavirus	Igacovirus	Gammacoronavirus_Anatiscopes(NL3)	DuCoV_NL3	Gamma_NL3
Public database	MK617472		472	partial, RdRp		2014-07-22	Poland			Cloacal/fecal swab	Avian coronavirus	GammaCoV/AvCoV/Mute_swan/Poland/Mor091pool1/2014	GammaCoV/AvCoV/Mute_swan/Poland/Mor091pool1/2014	mute swan	Anseriformes	Anatidae	Cygnus	Cygnus olor	yes	Coronaviridae	Orthocoronavirinae	Gammacoronavirus	Igacovirus	Gammacoronavirus_Anatiscopes(NL3)	DuCoV_NL3	Gamma_NL3
Public database	MK617517		456	partial, RdRp		2016-09-15	Poland			Cloacal/fecal swab	Avian coronavirus	GammaCoV/AvCoV/Mute_swan/Poland/P070/14/2016	GammaCoV/AvCoV/Mute_swan/Poland/P070/14/2016	mute swan	Anseriformes	Anatidae	Cygnus	Cygnus olor	yes	Coronaviridae	Orthocoronavirinae	Gammacoronavirus	Igacovirus	Gammacoronavirus_Anatiscopes(NL3)	DuCoV_NL3	Gamma_NL3
Public database	MK617461		472	partial, RdRp		2014-10-19	Poland			Cloacal/fecal swab	Avian coronavirus	GammaCoV/AvCoV/Mallard_duck/Poland/P148/2/2017	GammaCoV/AvCoV/Mallard_duck/Poland/P148/2/2017	mallard duck	Anseriformes	Anatidae	Anas	Anas platyrhynchos	yes	Coronaviridae	Orthocoronavirinae	Gammacoronavirus	Igacovirus	Gammacoronavirus_Anatiscopes(NL3)	DuCoV_NL3	Gamma_NL3
Public database	MK617448		472	partial, RdRp		2015-08-14	Poland			Cloacal/fecal swab	Avian coronavirus	GammaCoV/AvCoV/Mallard_duck/Poland/P092/5/2015	GammaCoV/AvCoV/Mallard_duck/Poland/P092/5/2015	mallard duck	Anseriformes	Anatidae	Anas	Anas platyrhynchos	yes	Coronaviridae	Orthocoronavirinae	Gammacoronavirus	Igacovirus	Gammacoronavirus_Anatiscopes(NL3)	DuCoV_NL3	Gamma_NL3
Public database	MK617464		472	partial, RdRp		2017-11-25	Poland			Cloacal/fecal swab	Avian coronavirus	GammaCoV/AvCoV/Mallard_duck/Poland/P348/3/2017	GammaCoV/AvCoV/Mallard_duck/Poland/P348/3/2017	mallard duck	Anseriformes	Anatidae	Anas	Anas platyrhynchos	yes	Coronaviridae	Orthocoronavirinae	Gammacoronavirus	Igacovirus	Gammacoronavirus_Anatiscopes(NL3)	DuCoV_NL3	Gamma_NL3
Public database	MK617425		472	partial, RdRp		2009-10-20	Poland			Cloacal/fecal swab	Avian coronavirus	GammaCoV/AvCoV/Mallard_duck/Poland/MW320/2009	GammaCoV/AvCoV/Mallard_duck/Poland/MW320/2009	mallard duck	Anseriformes	Anatidae	Anas	Anas platyrhynchos	yes	Coronaviridae	Orthocoronavirinae	Gammacoronavirus	Igacovirus	Gammacoronavirus_Anatiscopes(NL3)	DuCoV_NL3	Gamma_NL3
Public database	MK617400		472	partial, RdRp		2010-02-24	Poland			Cloacal/fecal swab	Avian coronavirus	GammaCoV/AvCoV/Coot/Poland/MW36B/2010	GammaCoV/AvCoV/Coot/Poland/MW36B/2010	coot	Gruiformes	Rallidae	Fulica	Fulica atra	yes	Coronaviridae	Orthocoronavirinae	Gammacoronavirus	Igacovirus	Gammacoronavirus_Anatiscopes(NL3)	DuCoV_NL3	Gamma_NL3
Public database	MK617416		472	partial, RdRp		2012-11-18	Poland			Cloacal/fecal swab	Avian coronavirus	GammaCoV/AvCoV/Mallard_duck/Poland/Mor129/2/2012	GammaCoV/AvCoV/Mallard_duck/Poland/Mor129/2/2012	mallard duck	Anseriformes	Anatidae	Anas	Anas platyrhynchos	yes	Coronaviridae	Orthocoronavirinae	Gammacoronavirus	Igacovirus	Gammacoronavirus_Anatiscopes(NL3)	DuCoV_NL3	Gamma_NL3
Public database	MK617442		458	partial, RdRp		2016-08-03	Poland			Cloacal/fecal swab	Avian coronavirus	GammaCoV/AvCoV/Mallard_duck/Poland/P067/3/2016	GammaCoV/AvCoV/Mallard_duck/Poland/P067/3/2016	mallard duck	Anseriformes	Anatidae	Anas	Anas platyrhynchos	yes	Coronaviridae	Orthocoronavirinae	Gammacoronavirus	Igacovirus	Gammacoronavirus_Anatiscopes(NL3)	DuCoV_NL3	Gamma_NL3
Public database	MK617420		472	partial, RdRp		2013-09-29	Poland			Cloacal/fecal swab	Avian coronavirus	GammaCoV/AvCoV/Mallard_duck/Poland/Mor79/2/2013	GammaCoV/AvCoV/Mallard_duck/Poland/Mor79/2/2013	mallard duck	Anseriformes	Anatidae	Anas	Anas platyrhynchos	yes	Coronaviridae	Orthocoronavirinae	Gammacoronavirus	Igacovirus	Gammacoronavirus_Anatiscopes(NL3)	DuCoV_NL3	Gamma_NL3
Public database	MK617403		472	partial, RdRp		2011-10-20	Poland			Cloacal/fecal swab	Avian coronavirus	GammaCoV/AvCoV/Greylag_goose/Poland/MW243/2011	GammaCoV/AvCoV/Greylag_goose/Poland/MW243/2011	greylag goose	Anseriformes	Anatidae	Anser	Anser anser	yes	Coronaviridae	Orthocoronavirinae	Gammacoronavirus	Igacovirus	Gammacoronavirus_Anatiscopes(NL3)	DuCoV_NL3	Gamma_NL3
Public database	MK617409		472	partial, RdRp		2012-01-02	Poland			Cloacal/fecal swab	Avian coronavirus	GammaCoV/AvCoV/Mallard_duck/Poland/Mor1/6/2012	GammaCoV/AvCoV/Mallard_duck/Poland/Mor1/6/2012	mallard duck	Anseriformes	Anatidae	Anas	Anas platyrhynchos	yes	Coronaviridae	Orthocoronavirinae	Gammacoronavirus	Igacovirus	Gammacoronavirus_Anatiscopes(NL3)	DuCoV_NL3	Gamma_NL3
Public database	MK617410		472	partial, RdRp		2014-09-18	Poland			Cloacal/fecal swab	Avian coronavirus	GammaCoV/AvCoV/Mallard_duck/Poland/P112/6/2014	GammaCoV/AvCoV/Mallard_duck/Poland/P112/6/2014	mallard duck	Anseriformes	Anatidae	Anas	Anas platyrhynchos	yes	Coronaviridae	Orthocoronavirinae	Gammacoronavirus	Igacovirus	Gammacoronavirus_Anatiscopes(NL3)	DuCoV_NL3	Gamma_NL3
Public database	MK617437		472	partial, RdRp		2015-02-14	Poland			Cloacal/fecal swab	Avian coronavirus	GammaCoV/AvCoV/Mallard_duck/Poland/P032/2/2015	GammaCoV/AvCoV/Mallard_duck/Poland/P032/2/2015	mallard duck	Anseriformes	Anatidae	Anas	Anas platyrhynchos	yes	Coronaviridae	Orthocoronavirinae	Gammacoronavirus	Igacovirus	Gammacoronavirus_Anatiscopes(NL3)	DuCoV_NL3	Gamma_NL3
Public database	MK617452		472	partial, RdRp		2015-08-31	Poland			Cloacal/fecal swab	Avian coronavirus	GammaCoV/AvCoV/Mallard_duck/Poland/P097/9/2015	GammaCoV/AvCoV/Mallard_duck/Poland/P097/9/2015	mallard duck	Anseriformes	Anatidae	Anas	Anas platyrhynchos	yes	Coronaviridae	Orthocoronavirinae	Gammacoronavirus	Igacovirus	Gammacoronavirus_Anatiscopes(NL3)	DuCoV_NL3	Gamma_NL3
Public database	KX588643		464	partial, RdRp		2013-08-14	Finland			cloacal swab, tracheal swab, oropharyngeal swab, or tissue	Avian coronavirus	AvCoV/Anas_platyrhynchos/Finland/13367/2010		Anas platyrhynchos	Charadriiformes	Laridae	Chroicocephalus	Chroicocephalus ridibundus		Coronaviridae	Orthocoronavirinae	Gammacoronavirus	Igacovirus	Gammacoronavirus_Anatiscopes(NL3)	DuCoV_NL3	Gamma_NL3
Public database	MK617476		472	partial, RdRp		2009-09-18	Poland			Cloacal/fecal swab	Avian coronavirus	GammaCoV/AvCoV/Mute_swan/Poland/MW240/2009	GammaCoV/AvCoV/Mute_swan/Poland/MW240/2009	mute swan	Anseriformes	Anatidae	Cygnus	Cygnus olor	yes	Coronaviridae	Orthocoronavirinae	Gammacoronavirus	Igacovirus	Gammacoronavirus_Anatiscopes(NL3)	DuCoV_NL3	Gamma_NL3
Public database	MK617455		472	partial, RdRp		2015-09-20	Poland			Cloacal/fecal swab	Avian coronavirus	GammaCoV/AvCoV/Mallard_duck/Poland/P108/11/2015	GammaCoV/AvCoV/Mallard_duck/Poland/P108/11/2015	mallard duck	Anseriformes	Anatidae	Anas	Anas platyrhynchos	yes	Coronaviridae	Orthocoronavirinae	Gammacoronavirus	Igacovirus	Gammacoronavirus_Anatiscopes(NL3)	DuCoV_NL3	Gamma_NL3
Public database	MK617413		472	partial, RdRp		2014-08-31	Poland			Cloacal/fecal swab	Avian coronavirus	GammaCoV/AvCoV/Mallard_duck/Poland/Mor105pool1/2 014	GammaCoV/AvCoV/Mallard_duck/Poland/Mor105pool1/2 014	mallard duck	Anseriformes	Anatidae	Anas	Anas platyrhynchos	yes	Coronaviridae	Orthocoronavirinae	Gammacoronavirus	Igacovirus	Gammacoronavirus_Anatiscopes(NL3)	DuCoV_NL3	Gamma_NL3
Public database	MK617489		472	partial, RdRp		2015-09-28	Poland			Cloacal/fecal swab	Avian coronavirus	GammaCoV/AvCoV/Mute_swan/Poland/P110/6/2015	GammaCoV/AvCoV/Mute_swan/Poland/P110/6/2015	mute swan	Anseriformes	Anatidae	Cygnus	Cygnus olor	yes	Coronaviridae	Orthocoronavirinae	Gammacoronavirus	Igacovirus	Gammacoronavirus_Anatiscopes(NL3)	DuCoV_NL3	Gamma_NL3
Public database	MK617456		472	partial, RdRp		2014-09-18	Poland			Cloacal/fecal swab	Avian coronavirus	GammaCoV/AvCoV/Mallard_duck/Poland/P112/5/2014	GammaCoV/AvCoV/Mallard_duck/Poland/P112/5/2014	mallard duck	Anseriformes	Anatidae	Anas	Anas platyrhynchos	yes	Coronaviridae	Orthocoronavirinae	Gammacoronavirus	Igacovirus	Gammacoronavirus_Anatiscopes(NL3)	DuCoV_NL3	Gamma_NL3
Public database	MK617468		472	partial, RdRp		2014-02-15	Poland			Cloacal/fecal swab	Avian coronavirus	GammaCoV/AvCoV/Mute_swan/Poland/Mor022/43/2014	GammaCoV/AvCoV/Mute_swan/Poland/Mor022/43/2014	mute swan	Anseriformes	Anatidae	Cygnus	Cygnus olor	yes	Coronaviridae	Orthocoronavirinae	Gammacoronavirus	Igacovirus	Gammacoronavirus_Anatiscopes(NL3)	DuCoV_NL3	Gamma_NL3
Public database	KX588664		463	partial, RdRp		2013-08-14	Finland			cloacal swab, tracheal swab, oropharyngeal swab, or tissue	Avian coronavirus	AvCoV/Anas_platyrhynchos/Finland/9135/2010		Anas platyrhynchos	Charadriiformes	Laridae	Chroicocephalus	Chroicocephalus ridibundus		Coronaviridae	Orthocoronavirinae	Gammacoronavirus	Igacovirus	Gammacoronavirus_Anatiscopes(NL3)	DuCoV_NL3	Gamma_NL3
Public database	KX588665		463	partial, RdRp		2013-08-14	Finland			cloacal swab, tracheal swab, oropharyngeal swab, or tissue	Avian coronavirus	AvCoV/Anas_platyrhynchos/Finland/9163/2010		Anas platyrhynchos	Charadriiformes	Laridae	Chroicocephalus	Chroicocephalus ridibundus		Coronaviridae	Orthocoronavirinae	Gammacoronavirus	Igacovirus	Gammacoronavirus_Anatiscopes(NL3)	DuCoV_NL3	Gamma_NL3
Public database	KX588635		464	partial, RdRp		2013-08-14	Finland			cloacal swab, tracheal swab, oropharyngeal swab, or tissue	Avian coronavirus	AvCoV/Anas_platyrhynchos/Finland/13345/2010		Anas platyrhynchos	Charadriiformes	Laridae	Chroicocephalus	Chroicocephalus ridibundus		Coronaviridae	Orthocoronavirinae	Gammacoronavirus	Igacovirus	Gammacoronavirus_Anatiscopes(NL3)	DuCoV_NL3	Gamma_NL3
Public database	KX588647		464	partial, RdRp		2013-08-14	Finland			cloacal swab, tracheal swab, oropharyngeal swab, or tissue	Avian coronavirus	AvCoV/Anas_platyrhynchos/Finland/13385/2010		Anas platyrhynchos	Charadriiformes	Laridae	Chroicocephalus	Chroicocephalus ridibundus		Coronaviridae	Orthocoronavirinae	Gammacoronavirus	Igacovirus	Gammacoronavirus_Anatiscopes(NL3)	DuCoV_NL3	Gamma_NL3
Public database	KX588639		464	partial, RdRp		2013-08-14	Finland			cloacal swab, tracheal swab, oropharyngeal swab, or tissue	Avian coronavirus	AvCoV/Anas_platyrhynchos/Finland/13347/2010		Anas platyrhynchos	Charadriiformes	Laridae	Chroicocephalus	Chroicocephalus ridibundus		Coronaviridae	Orthocoronavirinae	Gammacoronavirus	Igacovirus	Gammacoronavirus_Anatiscopes(NL3)	DuCoV_NL3	Gamma_NL3
[truncated: 2,116 more rows]

## Sheet: TableS6
Table S6 Comparative Identity of Gammacoronavirus and Deltacoronavirus Strains with Reference sequences in Five Conserved Regions
[truncated: 254 more rows]

## Sheet: TableS7
Table S7 Comparative Analysis of Whole Genome Sequence Homology for Gammacoronavirus and Deltacoronavirus
[truncated: 267 more rows]
[truncated: 217 more columns]

[truncated: 4 more sheets: TableS8, TableS9, TableS10, TableS11]
